# Supplementary material for: The effect of numerical aperture on quantitative use-wear studies and its implication on reproducibility
Source: PubMed Central journal article supplement (PMC6474883; doi:10.1038/s41598-019-42713-w), 2019-04-19

## **The effect of numerical aperture on quantitative use-wear studies and its implication on reproducibility**

Ivan Calandra, Lisa Schunk, Konstantin Bob, Walter Gneisinger, Antonella Pederghana, Eduardo Paixao, Andreas Hildebrandt, Joao Marreiros

*Scientific Reports*

**Supplementary Material 2.** PDF export of the results of the ConfoMap template applied to all analyzed surfaces. Editable \*.mnt files (which include the unprocessed surfaces) are available on Zenodo (DOI: <https://doi.org/10.5281/zenodo.1479117>).

**Flint FLT1-7**  
**50x objective, NA = 0.75 or 0.95**

| Identity card - FLT1-7_location1_LSM_50x-... |                                                |               |  |
|----------------------------------------------|------------------------------------------------|---------------|--|
| Name:                                        | FLT1-7_location1_LSM_50x-0.75_replica1_2018... |               |  |
| Created on:                                  | 8/15/2018 4:30:26 PM                           |               |  |
| <b>Axis: X</b>                               |                                                |               |  |
| Length:                                      | 255                                            | $\mu\text{m}$ |  |
| Size:                                        | 3000                                           | points        |  |
| Spacing:                                     | 85.2                                           | nm            |  |
| <b>Axis: Y</b>                               |                                                |               |  |
| Length:                                      | 255                                            | $\mu\text{m}$ |  |
| Size:                                        | 3000                                           | points        |  |
| Spacing:                                     | 85.2                                           | nm            |  |
| <b>Axis: Z</b>                               |                                                |               |  |
| Length:                                      | 28.1                                           | $\mu\text{m}$ |  |
| Size:                                        | 65532                                          | digits        |  |
| Spacing:                                     | 0.428                                          | nm            |  |
| NMP ratio:                                   | 0.00 % (0 Pts)                                 |               |  |

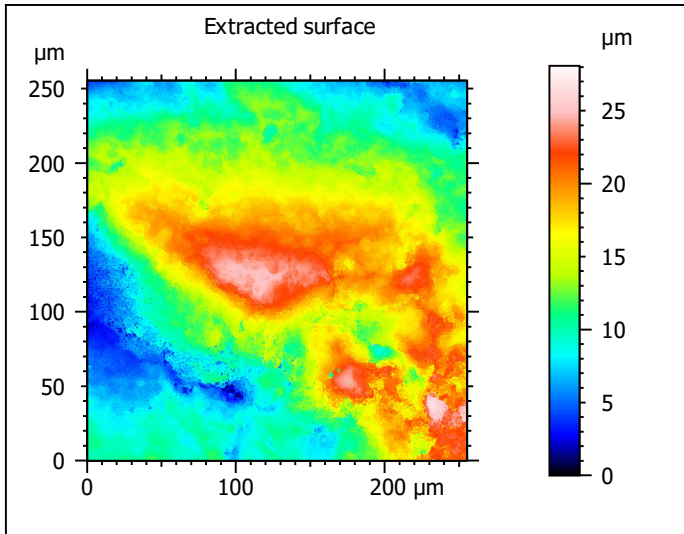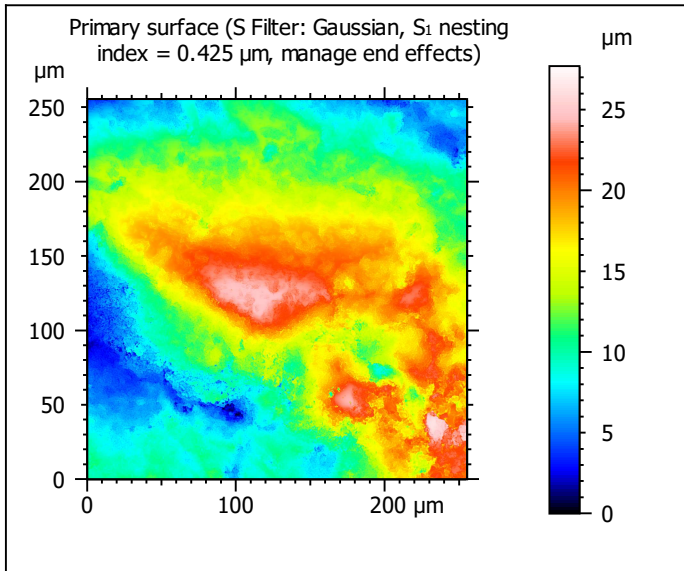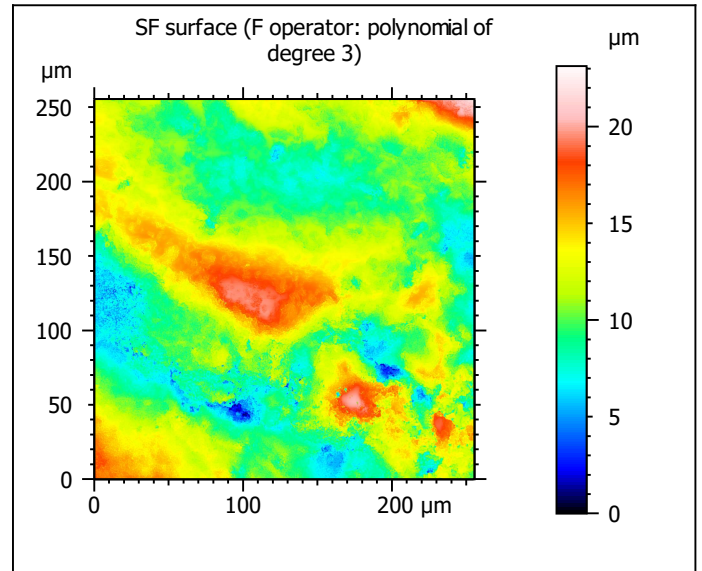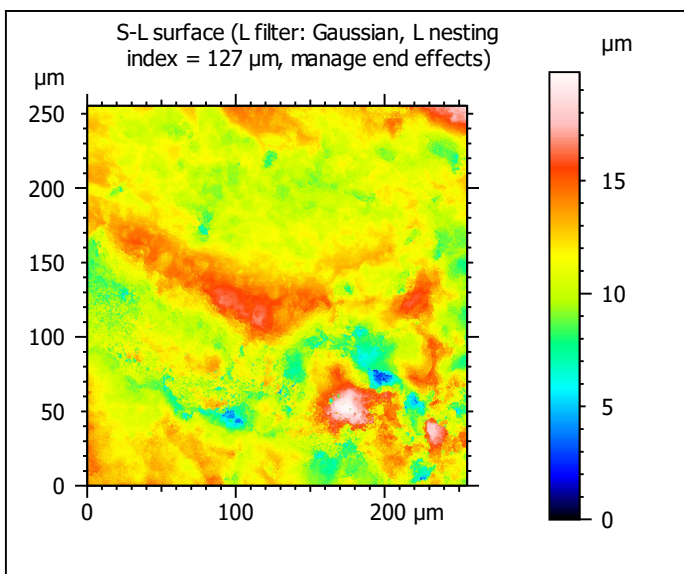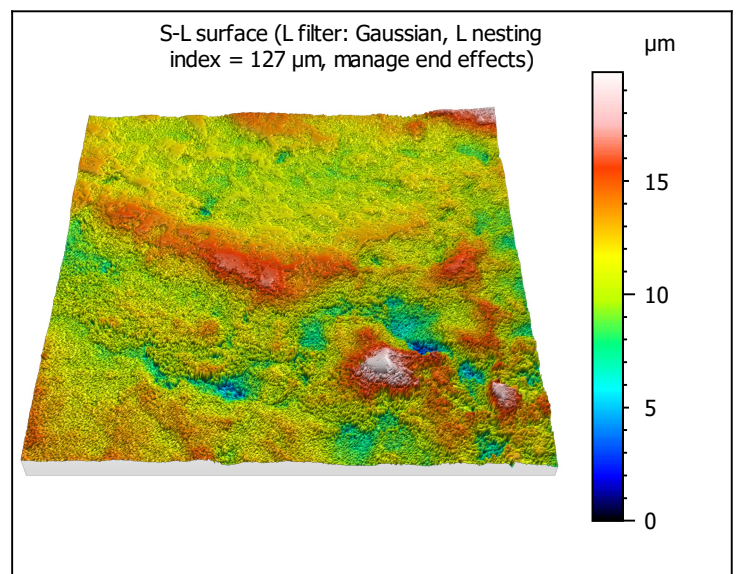

| ISO 25178                          |       |                                  |
|------------------------------------|-------|----------------------------------|
| <b>Height Parameters</b>           |       |                                  |
| Sq                                 | 1.92  | μm                               |
| Ssk                                | 0.251 |                                  |
| Sku                                | 4.41  |                                  |
| Sp                                 | 8.40  | μm                               |
| Sv                                 | 11.4  | μm                               |
| Sz                                 | 19.8  | μm                               |
| Sa                                 | 1.45  | μm                               |
| <b>Functional Parameters</b>       |       |                                  |
| Smr                                | 0.154 | %                                |
| Smc                                | 2.42  | μm                               |
| Sxp                                | 3.56  | μm                               |
| <b>Spatial Parameters</b>          |       |                                  |
| Sal                                | 17.2  | μm                               |
| Str                                | 0.504 |                                  |
| Std                                | 166   | °                                |
| <b>Hybrid Parameters</b>           |       |                                  |
| Sdq                                | 2.72  |                                  |
| Sdr                                | 119   | %                                |
| <b>Functional Parameters (V...</b> |       |                                  |
| Vm                                 | 0.125 | μm <sup>3</sup> /μm <sup>2</sup> |
| Vv                                 | 2.54  | μm <sup>3</sup> /μm <sup>2</sup> |
| Vmp                                | 0.125 | μm <sup>3</sup> /μm <sup>2</sup> |
| Vmc                                | 1.52  | μm <sup>3</sup> /μm <sup>2</sup> |
| Vvc                                | 2.32  | μm <sup>3</sup> /μm <sup>2</sup> |
| Vvv                                | 0.220 | μm <sup>3</sup> /μm <sup>2</sup> |
| <b>Functional Parameters (S...</b> |       |                                  |
| Sk                                 | 2.71  | μm                               |
| Spk                                | 1.74  | μm                               |
| Svk                                | 2.03  | μm                               |
| Smr1                               | 12.1  | %                                |
| Smr2                               | 87.6  | %                                |
| Spq                                | 0.442 |                                  |
| Svq                                | 3.71  |                                  |
| Smq                                | 55.8  |                                  |

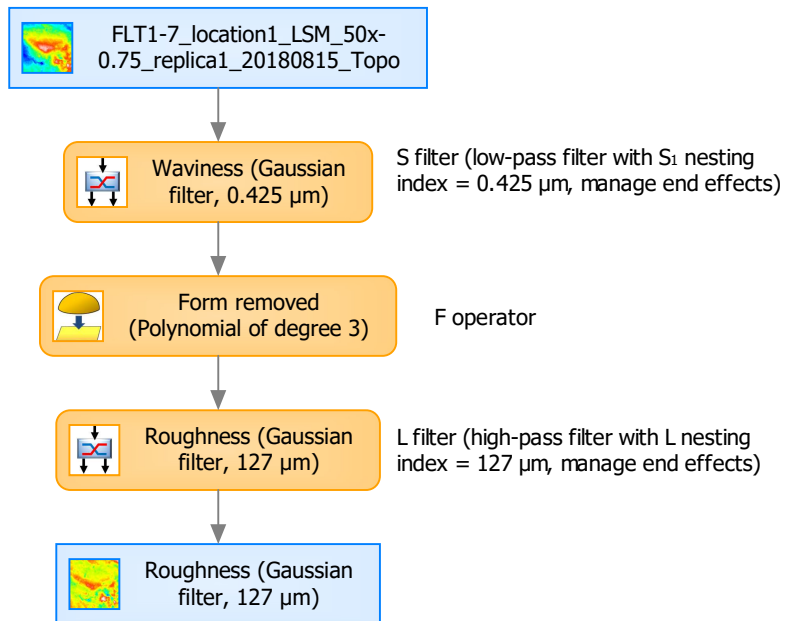

**Flint FLT1-7**  
**50x objective, NA = 0.75 or 0.95**

| Identity card - FLT1-7_location1_LSM_50x-... |                                                |               |  |
|----------------------------------------------|------------------------------------------------|---------------|--|
| Name:                                        | FLT1-7_location1_LSM_50x-0.75_replica2_2018... |               |  |
| Created on:                                  | 8/15/2018 4:56:32 PM                           |               |  |
| <b>Axis: X</b>                               |                                                |               |  |
| Length:                                      | 255                                            | $\mu\text{m}$ |  |
| Size:                                        | 3000                                           | points        |  |
| Spacing:                                     | 85.2                                           | nm            |  |
| <b>Axis: Y</b>                               |                                                |               |  |
| Length:                                      | 255                                            | $\mu\text{m}$ |  |
| Size:                                        | 3000                                           | points        |  |
| Spacing:                                     | 85.2                                           | nm            |  |
| <b>Axis: Z</b>                               |                                                |               |  |
| Length:                                      | 29.2                                           | $\mu\text{m}$ |  |
| Size:                                        | 65531                                          | digits        |  |
| Spacing:                                     | 0.445                                          | nm            |  |
| NMP ratio:                                   | 0.00 % (0 Pts)                                 |               |  |

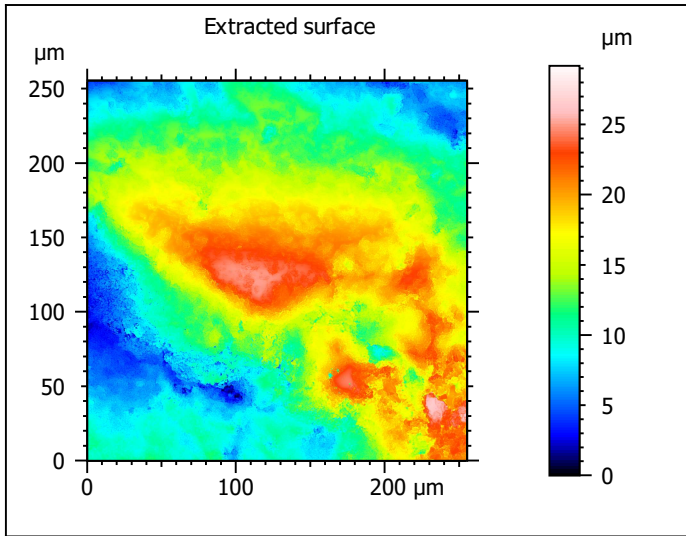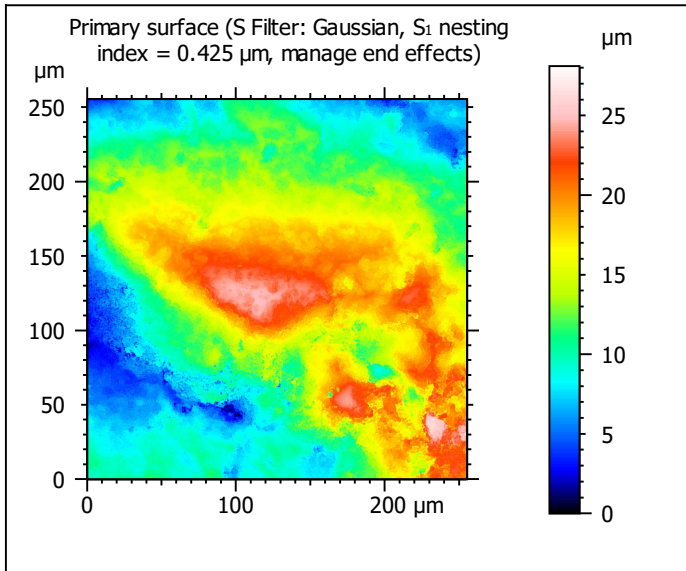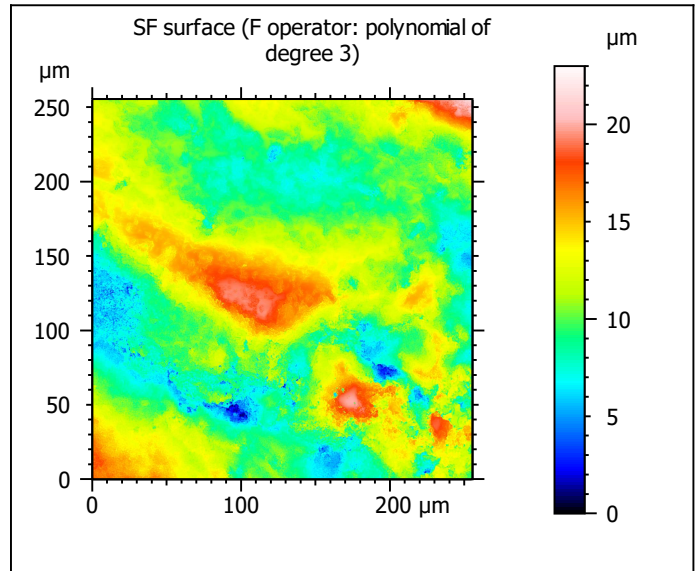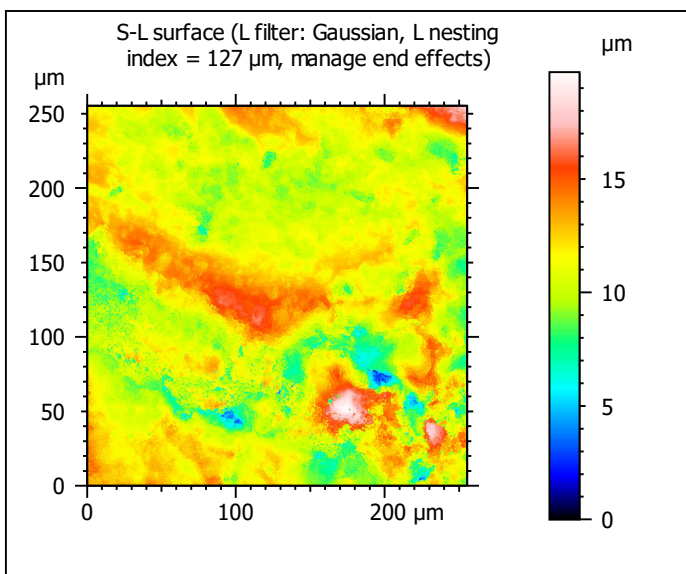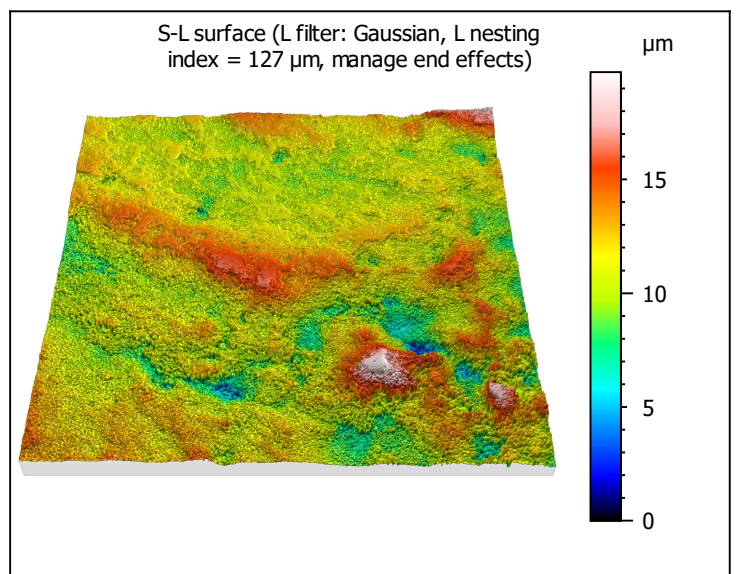

| ISO 25178                          |       |                                  |
|------------------------------------|-------|----------------------------------|
| <b>Height Parameters</b>           |       |                                  |
| Sq                                 | 1.91  | μm                               |
| Ssk                                | 0.260 |                                  |
| Sku                                | 4.40  |                                  |
| Sp                                 | 8.51  | μm                               |
| Sv                                 | 11.2  | μm                               |
| Sz                                 | 19.7  | μm                               |
| Sa                                 | 1.44  | μm                               |
| <b>Functional Parameters</b>       |       |                                  |
| Smr                                | 0.130 | %                                |
| Smc                                | 2.40  | μm                               |
| Sxp                                | 3.52  | μm                               |
| <b>Spatial Parameters</b>          |       |                                  |
| Sal                                | 17.2  | μm                               |
| Str                                | 0.506 |                                  |
| Std                                | 50.7  | °                                |
| <b>Hybrid Parameters</b>           |       |                                  |
| Sdq                                | 2.69  |                                  |
| Sdr                                | 117   | %                                |
| <b>Functional Parameters (V...</b> |       |                                  |
| Vm                                 | 0.125 | μm <sup>3</sup> /μm <sup>2</sup> |
| Vv                                 | 2.53  | μm <sup>3</sup> /μm <sup>2</sup> |
| Vmp                                | 0.125 | μm <sup>3</sup> /μm <sup>2</sup> |
| Vmc                                | 1.50  | μm <sup>3</sup> /μm <sup>2</sup> |
| Vvc                                | 2.31  | μm <sup>3</sup> /μm <sup>2</sup> |
| Vvv                                | 0.218 | μm <sup>3</sup> /μm <sup>2</sup> |
| <b>Functional Parameters (S...</b> |       |                                  |
| Sk                                 | 2.68  | μm                               |
| Spk                                | 1.74  | μm                               |
| Svk                                | 1.99  | μm                               |
| Smr1                               | 12.2  | %                                |
| Smr2                               | 87.5  | %                                |
| Spq                                | 1.41  |                                  |
| Svq                                | 3.66  |                                  |
| Smq                                | 98.1  |                                  |

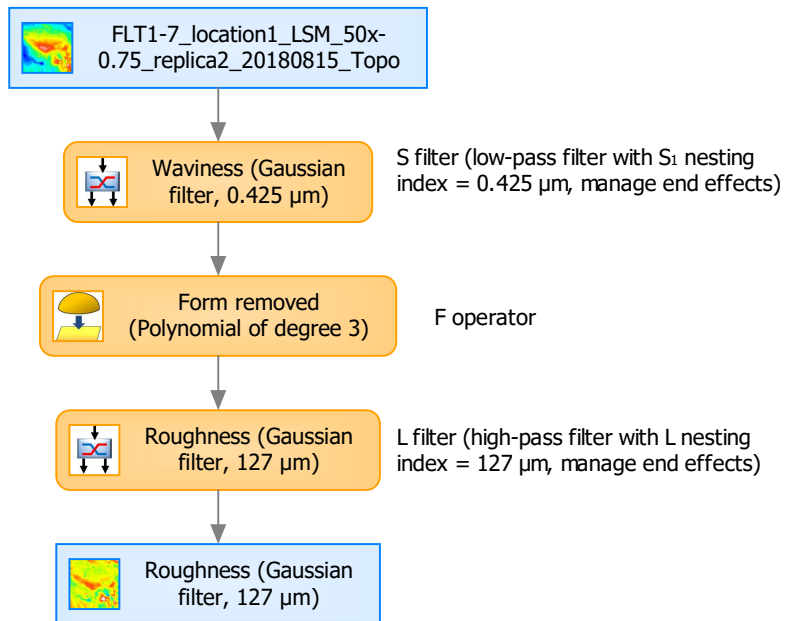

**Flint FLT1-7**  
**50x objective, NA = 0.75 or 0.95**

| Identity card - FLT1-7_location1_LSM_50x-... |                                                |               |  |
|----------------------------------------------|------------------------------------------------|---------------|--|
| Name:                                        | FLT1-7_location1_LSM_50x-0.75_replica3_2018... |               |  |
| Created on:                                  | 8/15/2018 5:17:01 PM                           |               |  |
| <b>Axis: X</b>                               |                                                |               |  |
| Length:                                      | 255                                            | $\mu\text{m}$ |  |
| Size:                                        | 3000                                           | points        |  |
| Spacing:                                     | 85.2                                           | nm            |  |
| <b>Axis: Y</b>                               |                                                |               |  |
| Length:                                      | 255                                            | $\mu\text{m}$ |  |
| Size:                                        | 3000                                           | points        |  |
| Spacing:                                     | 85.2                                           | nm            |  |
| <b>Axis: Z</b>                               |                                                |               |  |
| Length:                                      | 28.3                                           | $\mu\text{m}$ |  |
| Size:                                        | 65532                                          | digits        |  |
| Spacing:                                     | 0.431                                          | nm            |  |
| NMP ratio:                                   | 0.00 % (0 Pts)                                 |               |  |

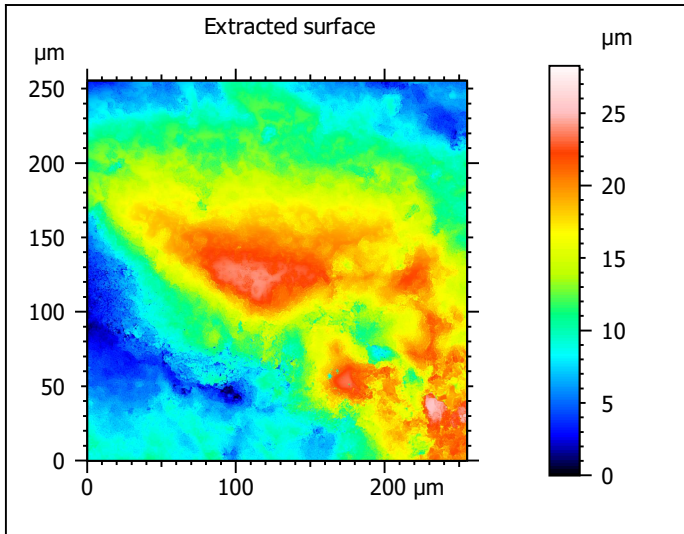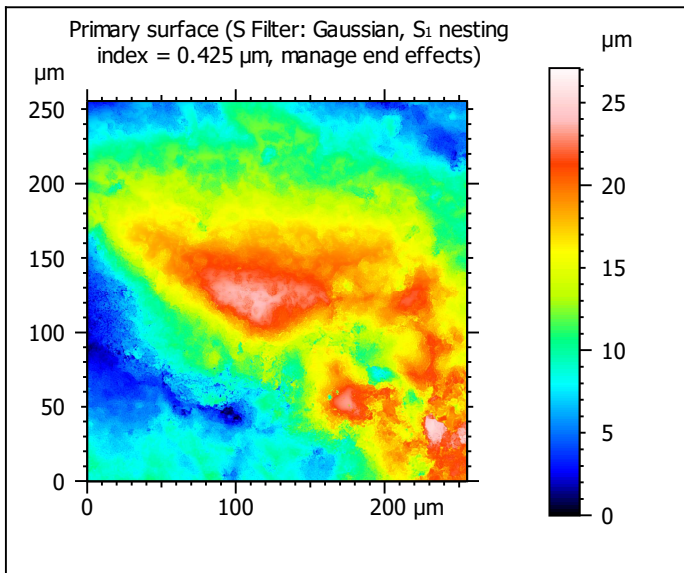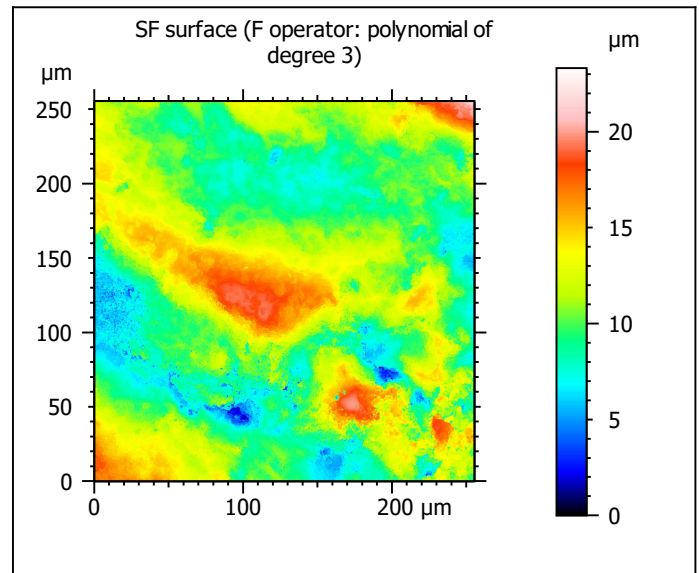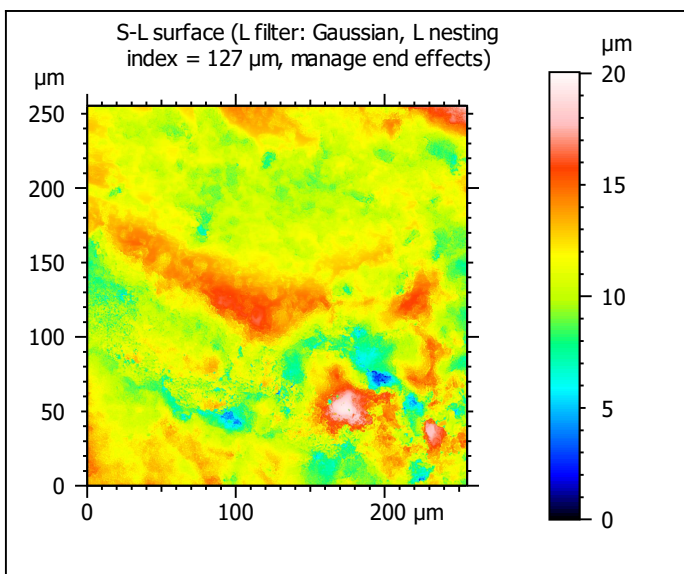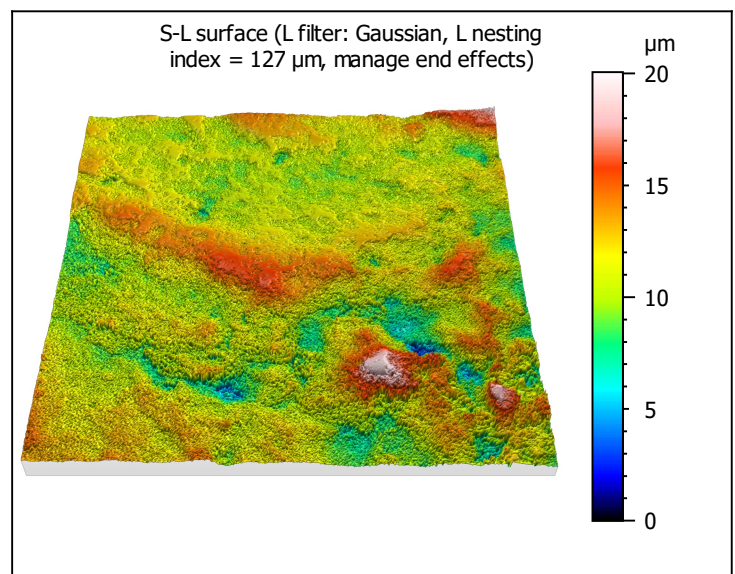

| ISO 25178                          |        |                                  |
|------------------------------------|--------|----------------------------------|
| <b>Height Parameters</b>           |        |                                  |
| Sq                                 | 1.90   | μm                               |
| Ssk                                | 0.251  |                                  |
| Sku                                | 4.35   |                                  |
| Sp                                 | 8.83   | μm                               |
| Sv                                 | 11.2   | μm                               |
| Sz                                 | 20.1   | μm                               |
| Sa                                 | 1.43   | μm                               |
| <b>Functional Parameters</b>       |        |                                  |
| Smr                                | 0.0643 | %                                |
| Smc                                | 2.39   | μm                               |
| Sxp                                | 3.52   | μm                               |
| <b>Spatial Parameters</b>          |        |                                  |
| Sal                                | 17.2   | μm                               |
| Str                                | 0.508  |                                  |
| Std                                | 167    | °                                |
| <b>Hybrid Parameters</b>           |        |                                  |
| Sdq                                | 2.67   |                                  |
| Sdr                                | 116    | %                                |
| <b>Functional Parameters (V...</b> |        |                                  |
| Vm                                 | 0.123  | μm <sup>3</sup> /μm <sup>2</sup> |
| Vv                                 | 2.51   | μm <sup>3</sup> /μm <sup>2</sup> |
| Vmp                                | 0.123  | μm <sup>3</sup> /μm <sup>2</sup> |
| Vmc                                | 1.50   | μm <sup>3</sup> /μm <sup>2</sup> |
| Vvc                                | 2.30   | μm <sup>3</sup> /μm <sup>2</sup> |
| Vvv                                | 0.218  | μm <sup>3</sup> /μm <sup>2</sup> |
| <b>Functional Parameters (S...</b> |        |                                  |
| Sk                                 | 2.67   | μm                               |
| Spk                                | 1.71   | μm                               |
| Svk                                | 1.98   | μm                               |
| Smr1                               | 12.2   | %                                |
| Smr2                               | 87.5   | %                                |
| Spq                                | 1.27   |                                  |
| Svq                                | 3.51   |                                  |
| Smq                                | 95.5   |                                  |

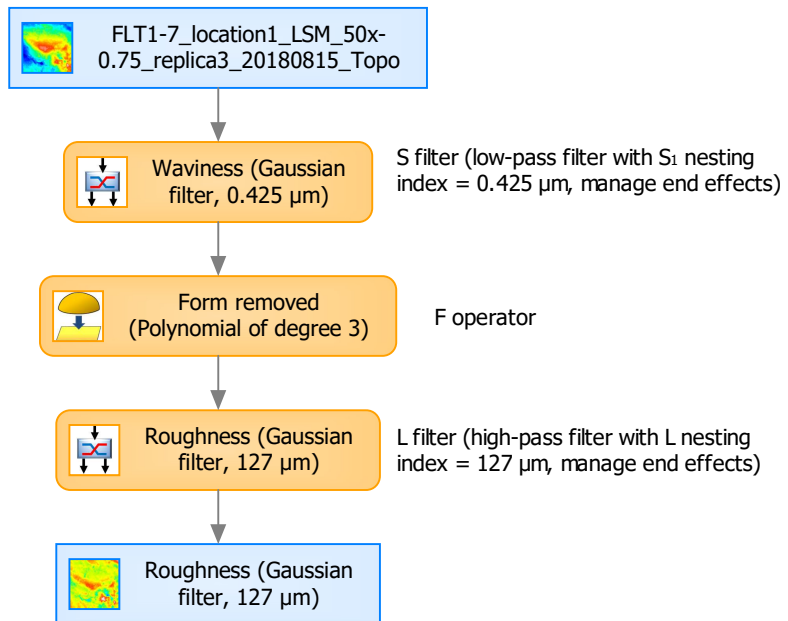

**Flint FLT1-7**  
**50x objective, NA = 0.75 or 0.95**

| Identity card - FLT1-7_location1_LSM_50x-... |                                                |               |  |
|----------------------------------------------|------------------------------------------------|---------------|--|
| Name:                                        | FLT1-7_location1_LSM_50x-0.95_replica1_2018... |               |  |
| Created on:                                  | 8/15/2018 4:17:30 PM                           |               |  |
| <b>Axis: X</b>                               |                                                |               |  |
| Length:                                      | 255                                            | $\mu\text{m}$ |  |
| Size:                                        | 3000                                           | points        |  |
| Spacing:                                     | 85.2                                           | nm            |  |
| <b>Axis: Y</b>                               |                                                |               |  |
| Length:                                      | 255                                            | $\mu\text{m}$ |  |
| Size:                                        | 3000                                           | points        |  |
| Spacing:                                     | 85.2                                           | nm            |  |
| <b>Axis: Z</b>                               |                                                |               |  |
| Length:                                      | 26.1                                           | $\mu\text{m}$ |  |
| Size:                                        | 65532                                          | digits        |  |
| Spacing:                                     | 0.398                                          | nm            |  |
| NMP ratio:                                   | 0.00 % (0 Pts)                                 |               |  |

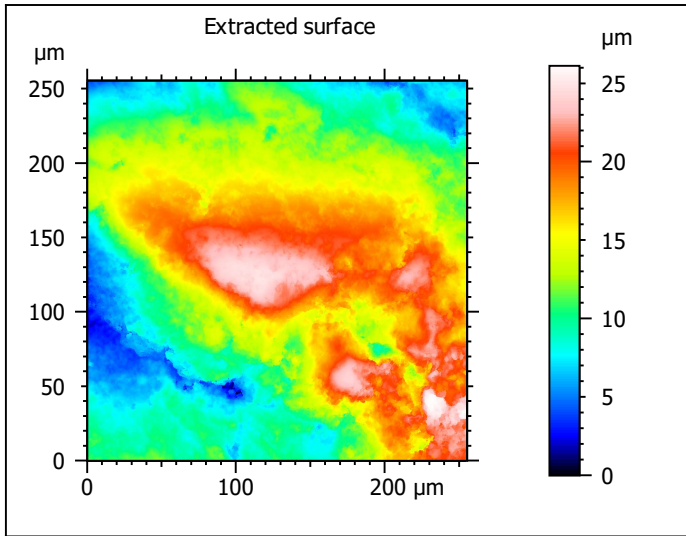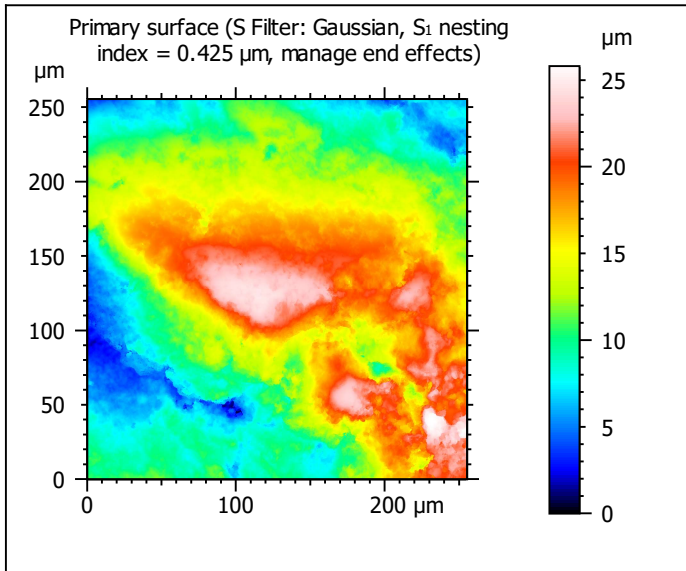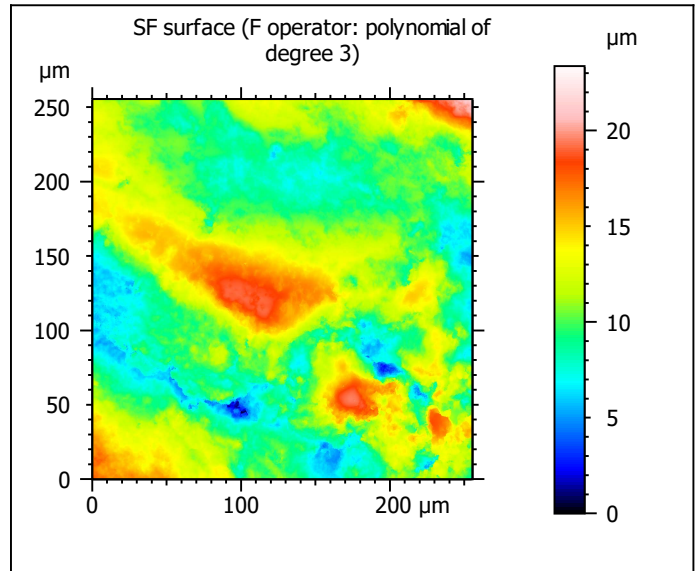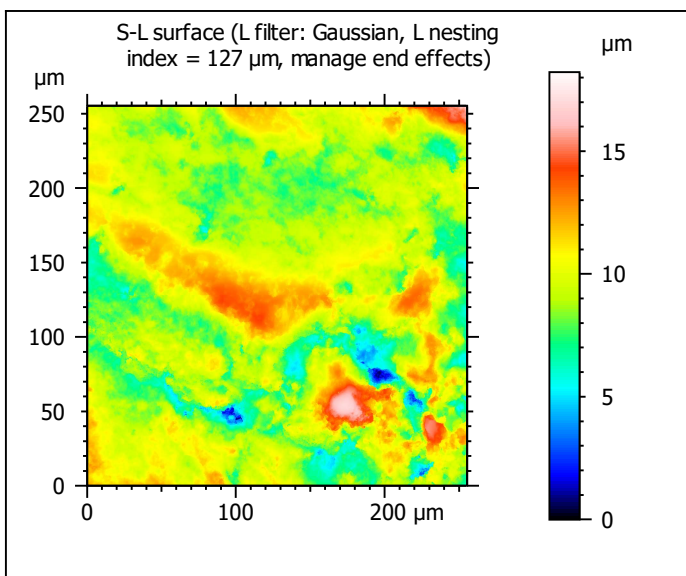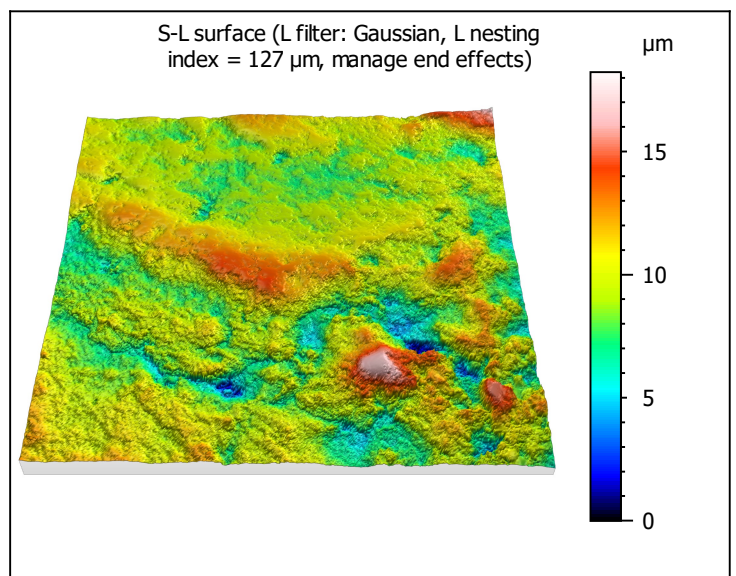



| ISO 25178                             |                                     |
|---------------------------------------|-------------------------------------|
| <b>Height Parameters</b>              |                                     |
| Sq                                    | 1.83 $\mu\text{m}$                  |
| Ssk                                   | 0.301                               |
| Sku                                   | 4.43                                |
| Sp                                    | 8.80 $\mu\text{m}$                  |
| Sv                                    | 9.43 $\mu\text{m}$                  |
| Sz                                    | 18.2 $\mu\text{m}$                  |
| Sa                                    | 1.38 $\mu\text{m}$                  |
| <b>Functional Parameters</b>          |                                     |
| Smr                                   | 0.00289 %                           |
| Smc                                   | 2.34 $\mu\text{m}$                  |
| Sxp                                   | 3.29 $\mu\text{m}$                  |
| <b>Spatial Parameters</b>             |                                     |
| Sal                                   | 17.5 $\mu\text{m}$                  |
| Str                                   | 0.489                               |
| Std                                   | 92.8 $^{\circ}$                     |
| <b>Hybrid Parameters</b>              |                                     |
| Sdq                                   | 1.26                                |
| Sdr                                   | 33.7 %                              |
| <b>Functional Parameters (Vol...)</b> |                                     |
| Vm                                    | 0.117 $\mu\text{m}^3/\mu\text{m}^2$ |
| Vv                                    | 2.46 $\mu\text{m}^3/\mu\text{m}^2$  |
| Vmp                                   | 0.117 $\mu\text{m}^3/\mu\text{m}^2$ |
| Vmc                                   | 1.42 $\mu\text{m}^3/\mu\text{m}^2$  |
| Vvc                                   | 2.26 $\mu\text{m}^3/\mu\text{m}^2$  |
| Vvv                                   | 0.204 $\mu\text{m}^3/\mu\text{m}^2$ |
| <b>Functional Parameters (Str...)</b> |                                     |
| Sk                                    | 2.35 $\mu\text{m}$                  |
| Spk                                   | 1.65 $\mu\text{m}$                  |
| Svk                                   | 1.83 $\mu\text{m}$                  |
| Smr1                                  | 13.2 %                              |
| Smr2                                  | 87.0 %                              |
| Spq                                   | 0.201                               |
| Svq                                   | 3.59                                |
| Smq                                   | 53.2                                |

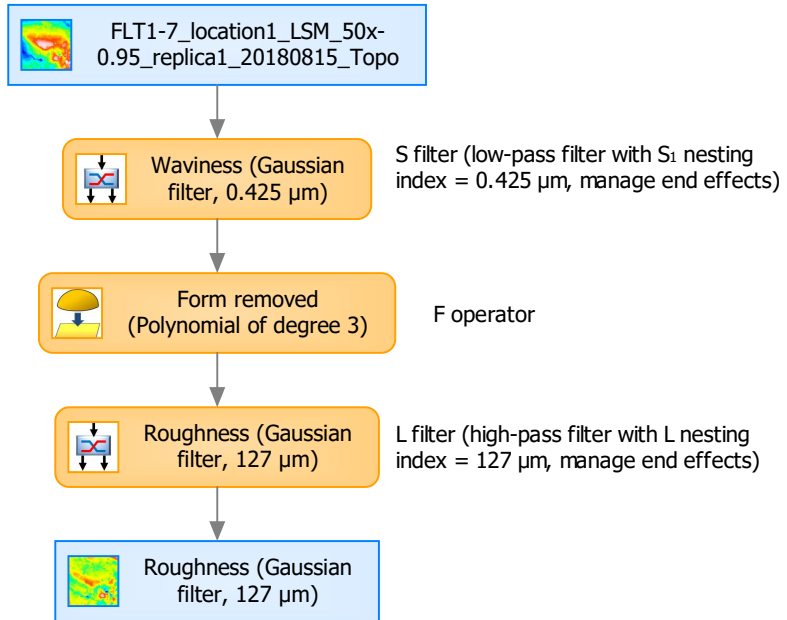

**Flint FLT1-7**  
**50x objective, NA = 0.75 or 0.95**

| Identity card - FLT1-7_location1_LSM_50x-... |                                                |               |  |
|----------------------------------------------|------------------------------------------------|---------------|--|
| Name:                                        | FLT1-7_location1_LSM_50x-0.95_replica2_2018... |               |  |
| Created on:                                  | 8/15/2018 4:44:00 PM                           |               |  |
| <b>Axis: X</b>                               |                                                |               |  |
| Length:                                      | 255                                            | $\mu\text{m}$ |  |
| Size:                                        | 3000                                           | points        |  |
| Spacing:                                     | 85.2                                           | nm            |  |
| <b>Axis: Y</b>                               |                                                |               |  |
| Length:                                      | 255                                            | $\mu\text{m}$ |  |
| Size:                                        | 3000                                           | points        |  |
| Spacing:                                     | 85.2                                           | nm            |  |
| <b>Axis: Z</b>                               |                                                |               |  |
| Length:                                      | 26.4                                           | $\mu\text{m}$ |  |
| Size:                                        | 65532                                          | digits        |  |
| Spacing:                                     | 0.403                                          | nm            |  |
| NMP ratio:                                   | 0.00 % (0 Pts)                                 |               |  |

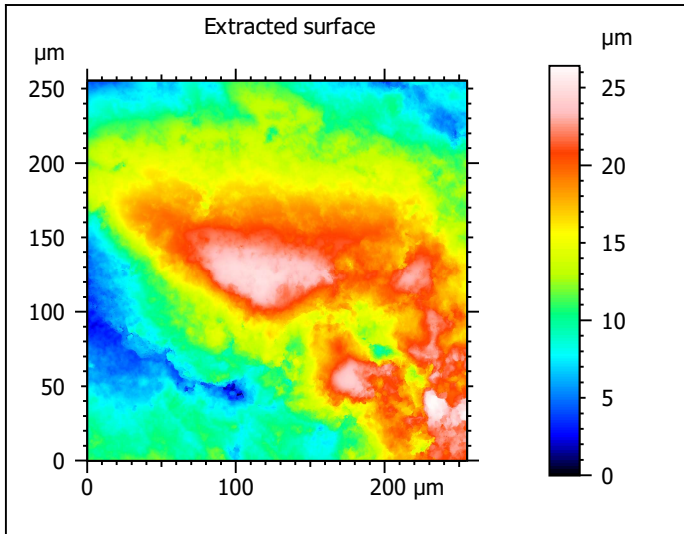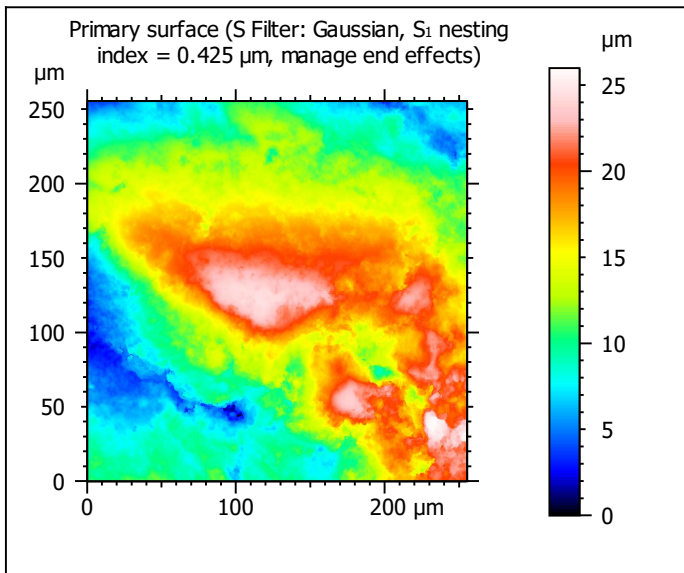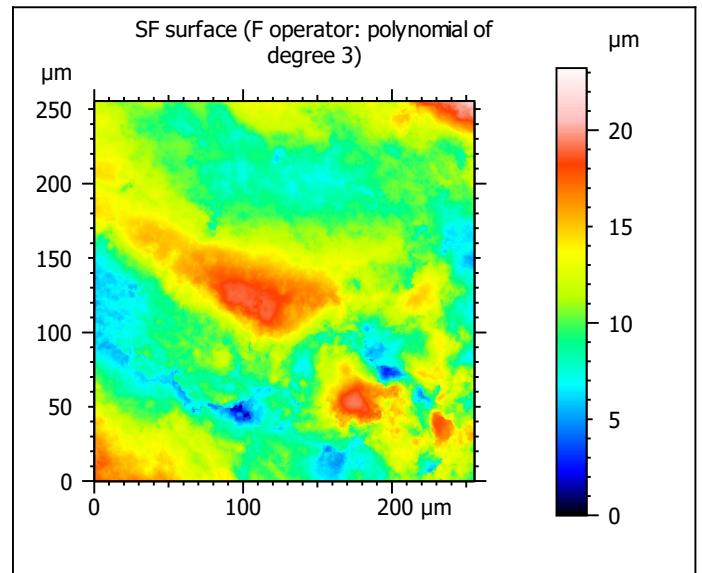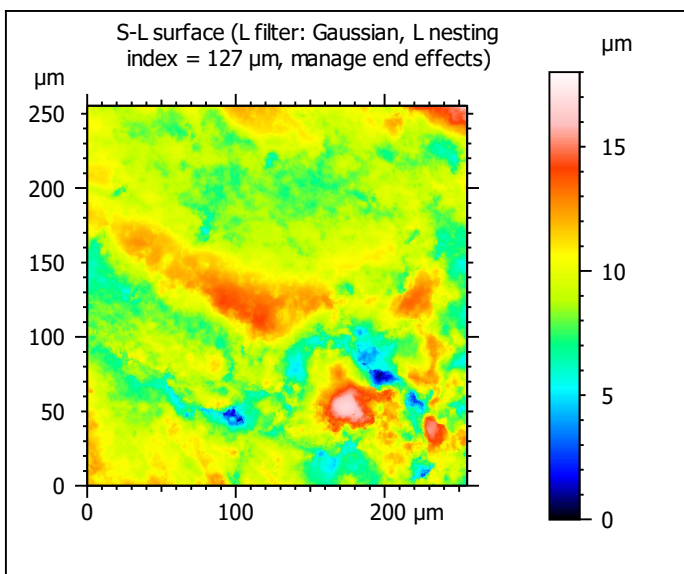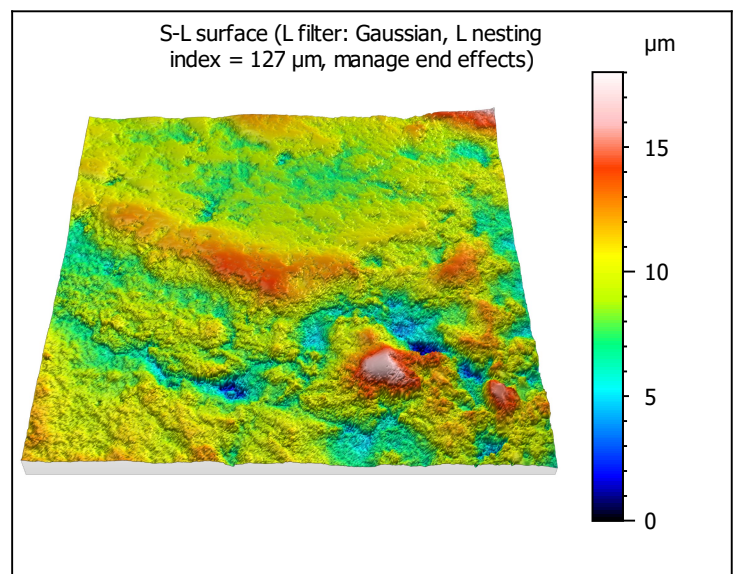

| <b>ISO 25178</b>                      |                                     |
|---------------------------------------|-------------------------------------|
| <b>Height Parameters</b>              |                                     |
| Sq                                    | 1.80 $\mu\text{m}$                  |
| Ssk                                   | 0.289                               |
| Sku                                   | 4.42                                |
| Sp                                    | 8.68 $\mu\text{m}$                  |
| Sv                                    | 9.33 $\mu\text{m}$                  |
| Sz                                    | 18.0 $\mu\text{m}$                  |
| Sa                                    | 1.36 $\mu\text{m}$                  |
| <b>Functional Parameters</b>          |                                     |
| Smr                                   | 0.00222 %                           |
| Smc                                   | 2.32 $\mu\text{m}$                  |
| Sxp                                   | 3.25 $\mu\text{m}$                  |
| <b>Spatial Parameters</b>             |                                     |
| Sal                                   | 17.6 $\mu\text{m}$                  |
| Str                                   | 0.484                               |
| Std                                   | 92.8 $^\circ$                       |
| <b>Hybrid Parameters</b>              |                                     |
| Sdq                                   | 1.24                                |
| Sdr                                   | 33.1 %                              |
| <b>Functional Parameters (Vol...)</b> |                                     |
| Vm                                    | 0.115 $\mu\text{m}^3/\mu\text{m}^2$ |
| Vv                                    | 2.43 $\mu\text{m}^3/\mu\text{m}^2$  |
| Vmp                                   | 0.115 $\mu\text{m}^3/\mu\text{m}^2$ |
| Vmc                                   | 1.41 $\mu\text{m}^3/\mu\text{m}^2$  |
| Vvc                                   | 2.23 $\mu\text{m}^3/\mu\text{m}^2$  |
| Vvv                                   | 0.202 $\mu\text{m}^3/\mu\text{m}^2$ |
| <b>Functional Parameters (Str...)</b> |                                     |
| Sk                                    | 2.34 $\mu\text{m}$                  |
| Spk                                   | 1.64 $\mu\text{m}$                  |
| Svk                                   | 1.82 $\mu\text{m}$                  |
| Smr1                                  | 12.8 %                              |
| Smr2                                  | 87.1 %                              |
| Spq                                   | 0.0523                              |
| Svq                                   | 3.61                                |
| Smq                                   | 46.8                                |

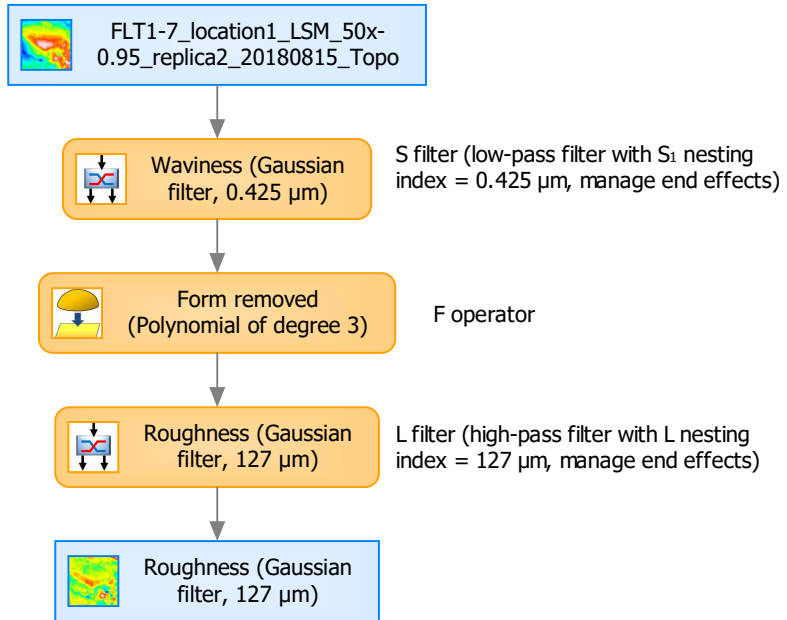

**Flint FLT1-7**  
**50x objective, NA = 0.75 or 0.95**

| Identity card - FLT1-7_location1_LSM_50x-... |                                                |        |  |
|----------------------------------------------|------------------------------------------------|--------|--|
| Name:                                        | FLT1-7_location1_LSM_50x-0.95_replica3_2018... |        |  |
| Created on:                                  | 8/15/2018 5:06:24 PM                           |        |  |
| <b>Axis: X</b>                               |                                                |        |  |
| Length:                                      | 255                                            | μm     |  |
| Size:                                        | 3000                                           | points |  |
| Spacing:                                     | 85.2                                           | nm     |  |
| <b>Axis: Y</b>                               |                                                |        |  |
| Length:                                      | 255                                            | μm     |  |
| Size:                                        | 3000                                           | points |  |
| Spacing:                                     | 85.2                                           | nm     |  |
| <b>Axis: Z</b>                               |                                                |        |  |
| Length:                                      | 25.9                                           | μm     |  |
| Size:                                        | 65532                                          | digits |  |
| Spacing:                                     | 0.395                                          | nm     |  |
| NMP ratio:                                   | 0.00 % (0 Pts)                                 |        |  |

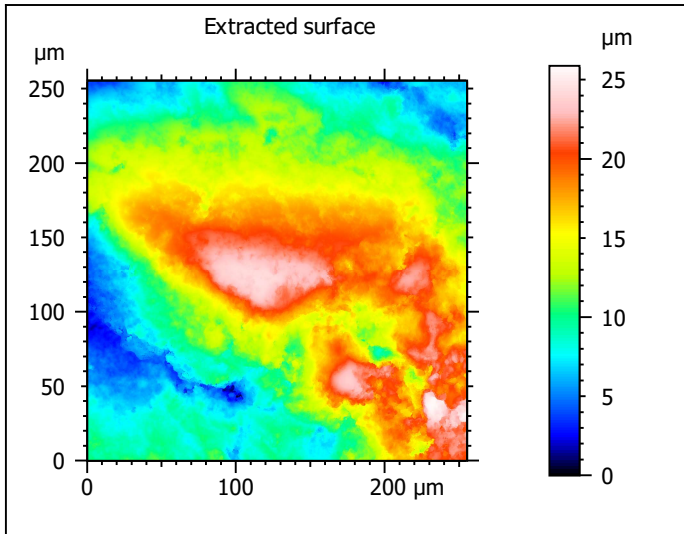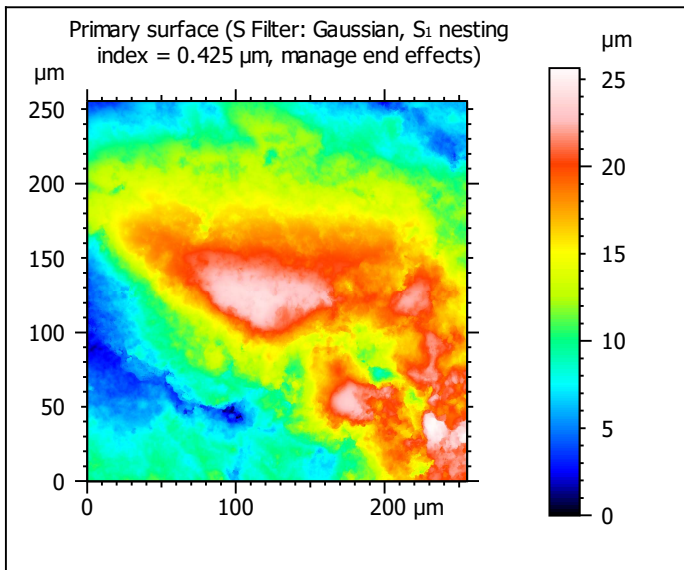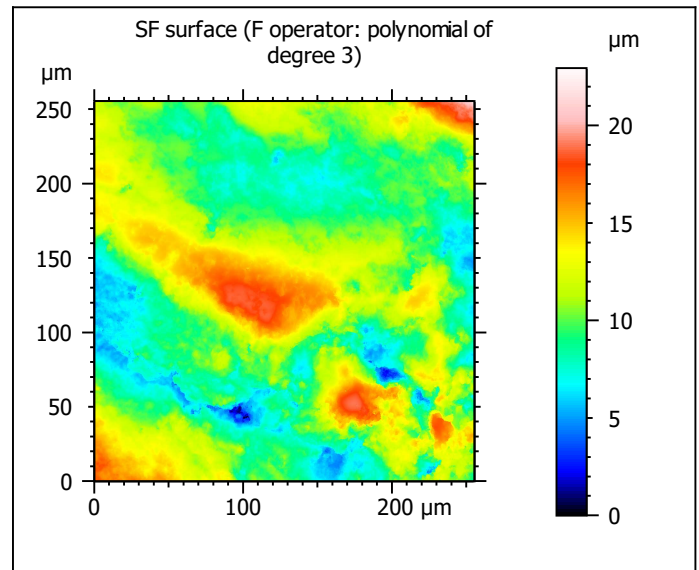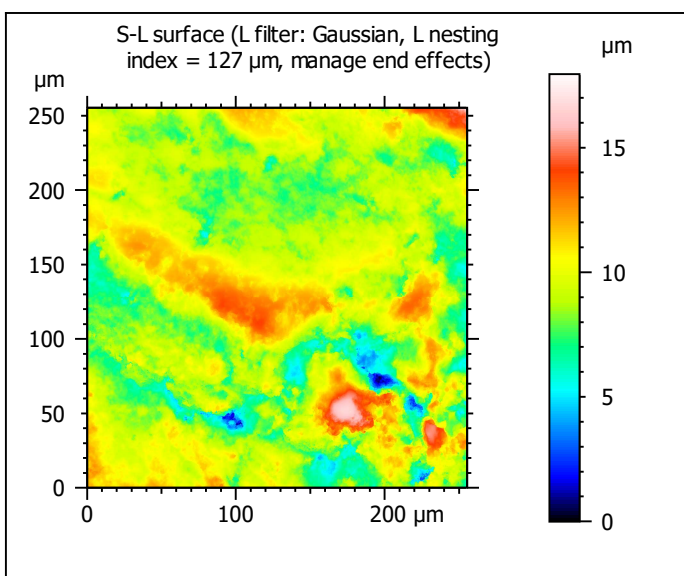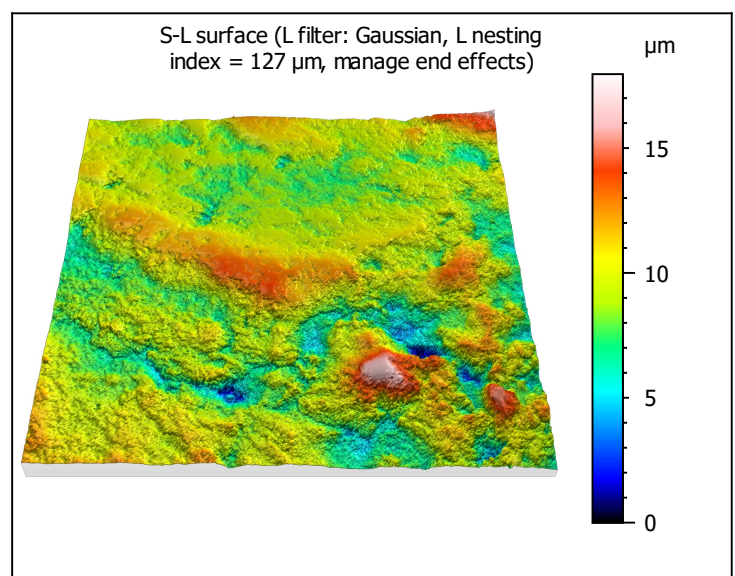

| ISO 25178                             |                                     |
|---------------------------------------|-------------------------------------|
| <b>Height Parameters</b>              |                                     |
| Sq                                    | 1.80 $\mu\text{m}$                  |
| Ssk                                   | 0.284                               |
| Sku                                   | 4.39                                |
| Sp                                    | 8.70 $\mu\text{m}$                  |
| Sv                                    | 9.26 $\mu\text{m}$                  |
| Sz                                    | 18.0 $\mu\text{m}$                  |
| Sa                                    | 1.36 $\mu\text{m}$                  |
| <b>Functional Parameters</b>          |                                     |
| Smr                                   | 0.00444 %                           |
| Smc                                   | 2.32 $\mu\text{m}$                  |
| Sxp                                   | 3.25 $\mu\text{m}$                  |
| <b>Spatial Parameters</b>             |                                     |
| Sal                                   | 17.6 $\mu\text{m}$                  |
| Str                                   | 0.484                               |
| Std                                   | 92.8 $^\circ$                       |
| <b>Hybrid Parameters</b>              |                                     |
| Sdq                                   | 1.24                                |
| Sdr                                   | 32.8 %                              |
| <b>Functional Parameters (Vol...)</b> |                                     |
| Vm                                    | 0.115 $\mu\text{m}^3/\mu\text{m}^2$ |
| Vv                                    | 2.43 $\mu\text{m}^3/\mu\text{m}^2$  |
| Vmp                                   | 0.115 $\mu\text{m}^3/\mu\text{m}^2$ |
| Vmc                                   | 1.41 $\mu\text{m}^3/\mu\text{m}^2$  |
| Vvc                                   | 2.23 $\mu\text{m}^3/\mu\text{m}^2$  |
| Vvv                                   | 0.202 $\mu\text{m}^3/\mu\text{m}^2$ |
| <b>Functional Parameters (Str...)</b> |                                     |
| Sk                                    | 2.34 $\mu\text{m}$                  |
| Spk                                   | 1.63 $\mu\text{m}$                  |
| Svk                                   | 1.82 $\mu\text{m}$                  |
| Smr1                                  | 12.8 %                              |
| Smr2                                  | 87.1 %                              |
| Spq                                   | 0.0791                              |
| Svq                                   | 3.58                                |
| Smq                                   | 47.3                                |

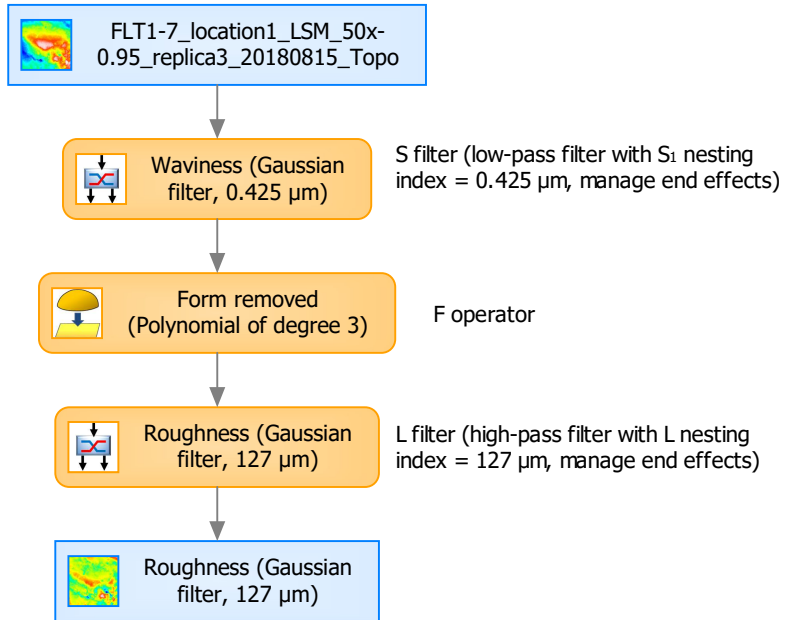

**Flint FLT1-7**  
**50x objective, NA = 0.75 or 0.95**

| Identity card - FLT1-7_location2_LSM_50x-... |                                                |               |  |
|----------------------------------------------|------------------------------------------------|---------------|--|
| Name:                                        | FLT1-7_location2_LSM_50x-0.75_replica1_2018... |               |  |
| Created on:                                  | 8/16/2018 3:35:16 PM                           |               |  |
| <b>Axis: X</b>                               |                                                |               |  |
| Length:                                      | 255                                            | $\mu\text{m}$ |  |
| Size:                                        | 3000                                           | points        |  |
| Spacing:                                     | 85.2                                           | nm            |  |
| <b>Axis: Y</b>                               |                                                |               |  |
| Length:                                      | 255                                            | $\mu\text{m}$ |  |
| Size:                                        | 3000                                           | points        |  |
| Spacing:                                     | 85.2                                           | nm            |  |
| <b>Axis: Z</b>                               |                                                |               |  |
| Length:                                      | 35.5                                           | $\mu\text{m}$ |  |
| Size:                                        | 65532                                          | digits        |  |
| Spacing:                                     | 0.541                                          | nm            |  |
| NMP ratio:                                   | 0.00 % (0 Pts)                                 |               |  |

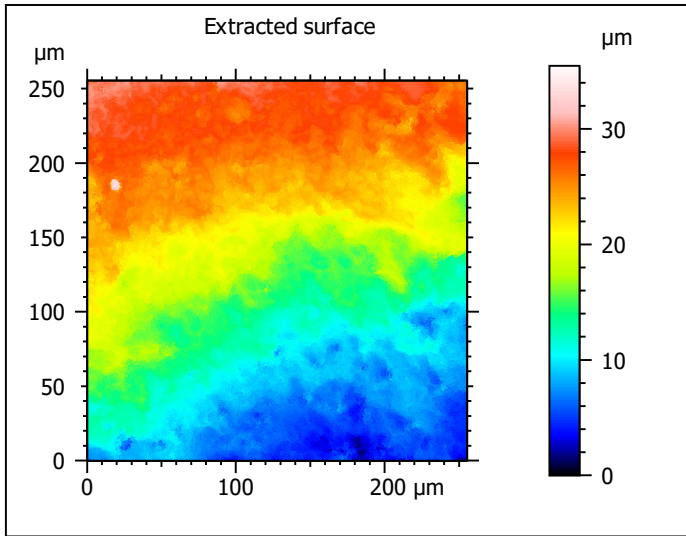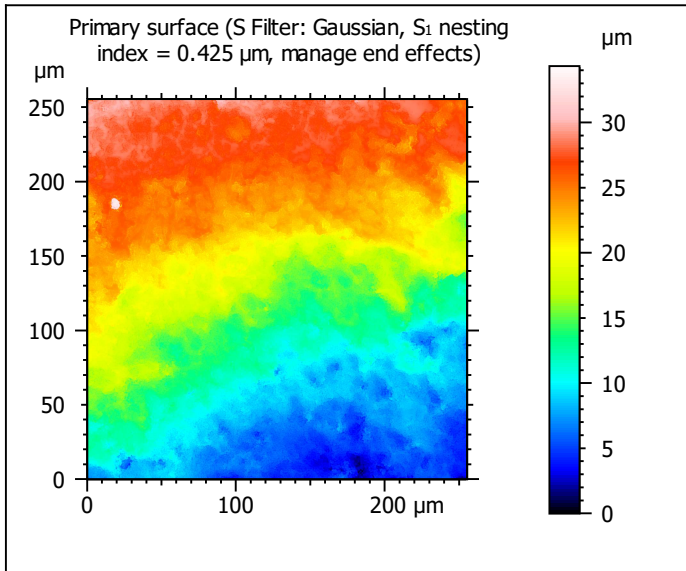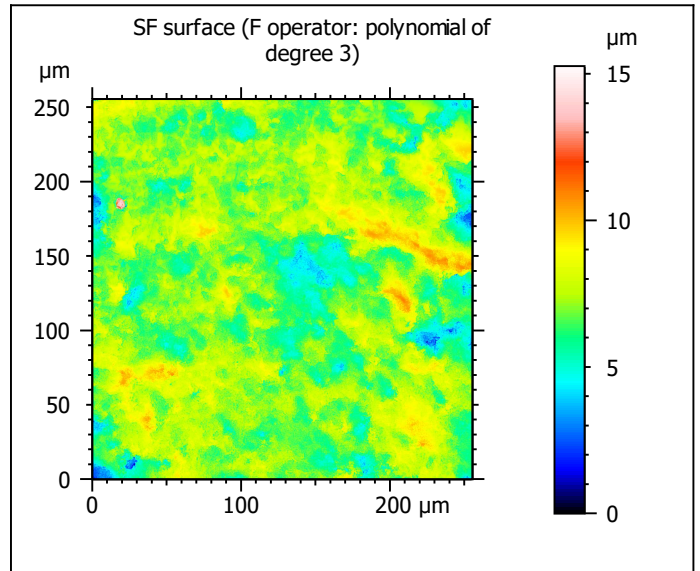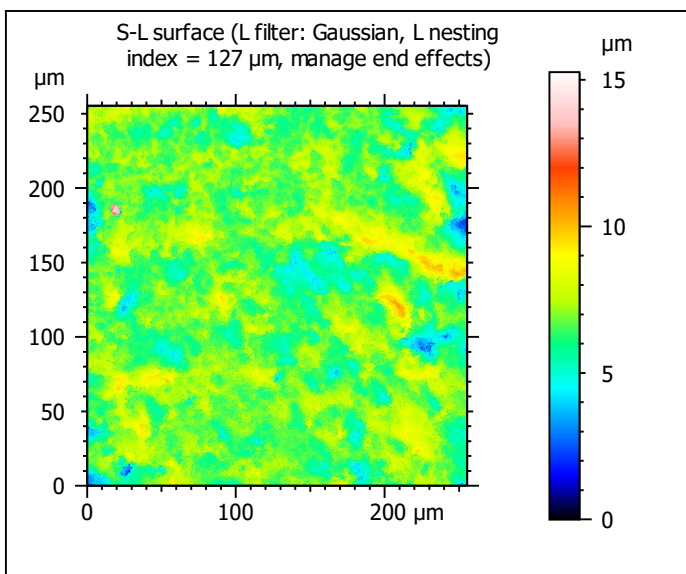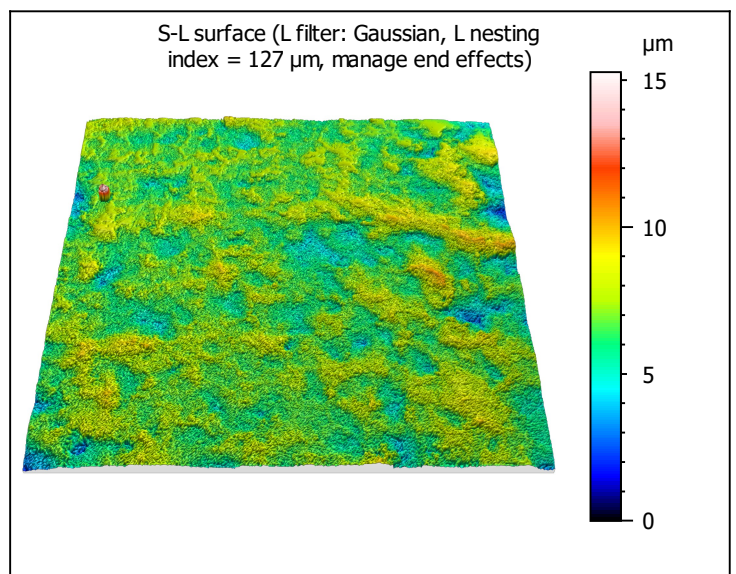

| ISO 25178                             |                                      |
|---------------------------------------|--------------------------------------|
| <b>Height Parameters</b>              |                                      |
| Sq                                    | 1.00 $\mu\text{m}$                   |
| Ssk                                   | -0.144                               |
| Sku                                   | 5.02                                 |
| Sp                                    | 8.52 $\mu\text{m}$                   |
| Sv                                    | 6.75 $\mu\text{m}$                   |
| Sz                                    | 15.3 $\mu\text{m}$                   |
| Sa                                    | 0.754 $\mu\text{m}$                  |
| <b>Functional Parameters</b>          |                                      |
| Smr                                   | 0.000783 %                           |
| Smc                                   | 1.17 $\mu\text{m}$                   |
| Sxp                                   | 2.17 $\mu\text{m}$                   |
| <b>Spatial Parameters</b>             |                                      |
| Sal                                   | 10.9 $\mu\text{m}$                   |
| Str                                   | 0.780                                |
| Std                                   | 132 $^\circ$                         |
| <b>Hybrid Parameters</b>              |                                      |
| Sdq                                   | 1.95                                 |
| Sdr                                   | 90.4 %                               |
| <b>Functional Parameters (Vol...)</b> |                                      |
| Vm                                    | 0.0561 $\mu\text{m}^3/\mu\text{m}^2$ |
| Vv                                    | 1.23 $\mu\text{m}^3/\mu\text{m}^2$   |
| Vmp                                   | 0.0561 $\mu\text{m}^3/\mu\text{m}^2$ |
| Vmc                                   | 0.805 $\mu\text{m}^3/\mu\text{m}^2$  |
| Vvc                                   | 1.09 $\mu\text{m}^3/\mu\text{m}^2$   |
| Vvv                                   | 0.139 $\mu\text{m}^3/\mu\text{m}^2$  |
| <b>Functional Parameters (Str...)</b> |                                      |
| Sk                                    | 1.98 $\mu\text{m}$                   |
| Spk                                   | 0.990 $\mu\text{m}$                  |
| Svk                                   | 1.12 $\mu\text{m}$                   |
| Smr1                                  | 10.0 %                               |
| Smr2                                  | 87.9 %                               |
| Spq                                   | *****                                |
| Svq                                   | *****                                |
| Smq                                   | *****                                |

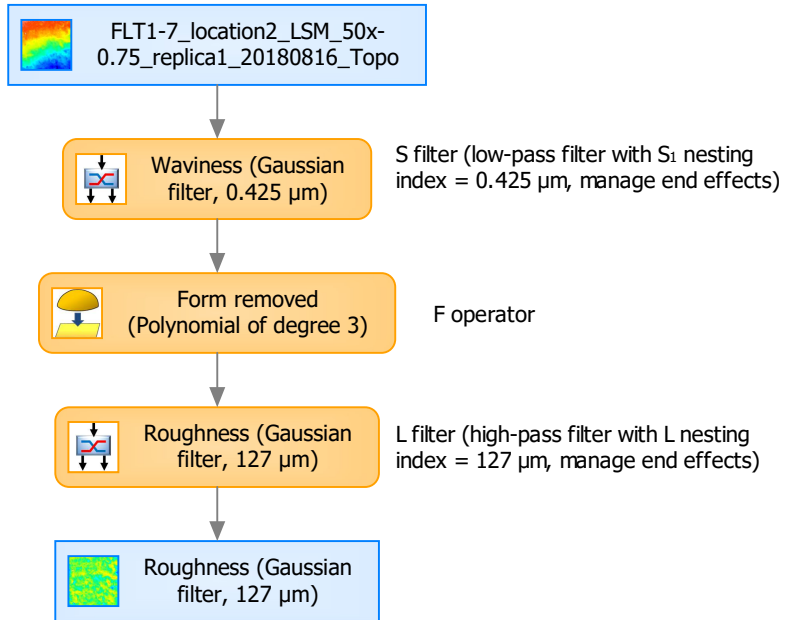

**Flint FLT1-7**  
**50x objective, NA = 0.75 or 0.95**

| Identity card - FLT1-7_location2_LSM_50x-... |                                                |               |  |
|----------------------------------------------|------------------------------------------------|---------------|--|
| Name:                                        | FLT1-7_location2_LSM_50x-0.75_replica2_2018... |               |  |
| Created on:                                  | 8/16/2018 4:01:40 PM                           |               |  |
| <b>Axis: X</b>                               |                                                |               |  |
| Length:                                      | 255                                            | $\mu\text{m}$ |  |
| Size:                                        | 3000                                           | points        |  |
| Spacing:                                     | 85.2                                           | nm            |  |
| <b>Axis: Y</b>                               |                                                |               |  |
| Length:                                      | 255                                            | $\mu\text{m}$ |  |
| Size:                                        | 3000                                           | points        |  |
| Spacing:                                     | 85.2                                           | nm            |  |
| <b>Axis: Z</b>                               |                                                |               |  |
| Length:                                      | 34.6                                           | $\mu\text{m}$ |  |
| Size:                                        | 65532                                          | digits        |  |
| Spacing:                                     | 0.528                                          | nm            |  |
| NMP ratio:                                   | 0.00 % (0 Pts)                                 |               |  |

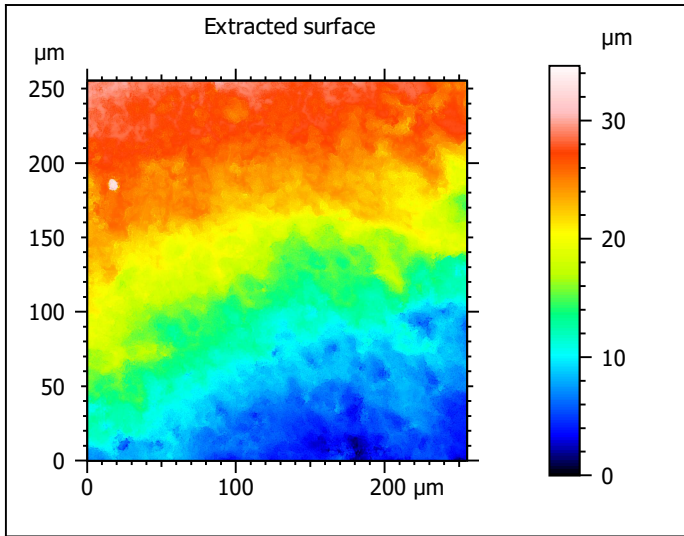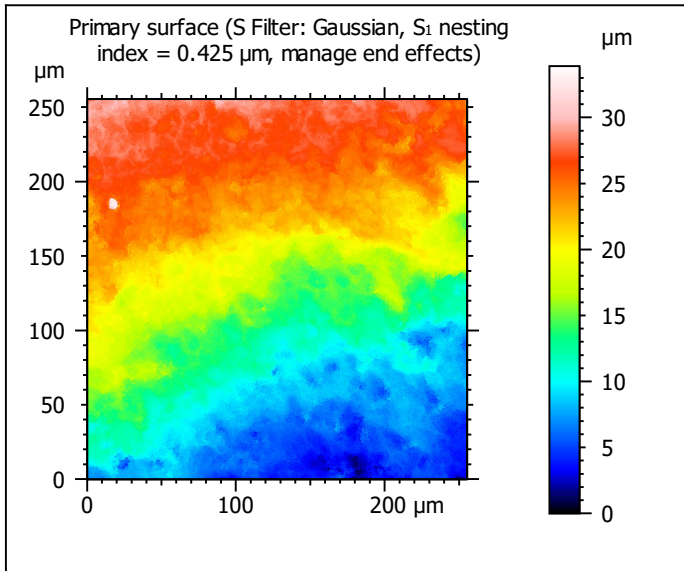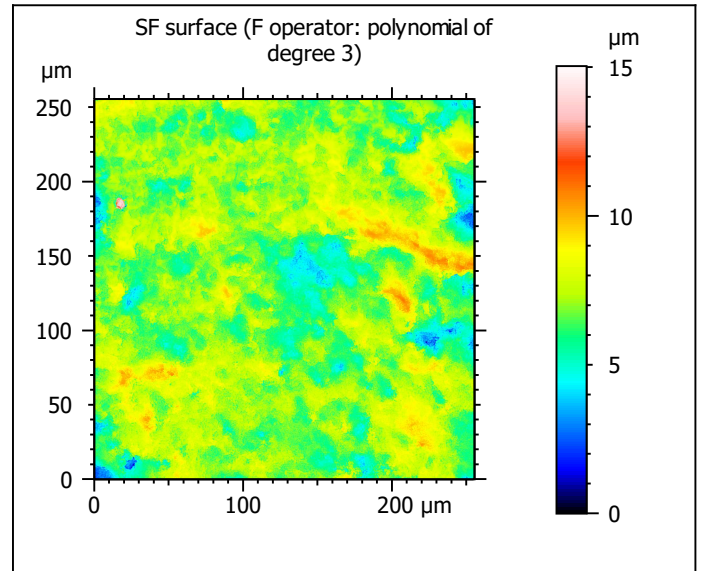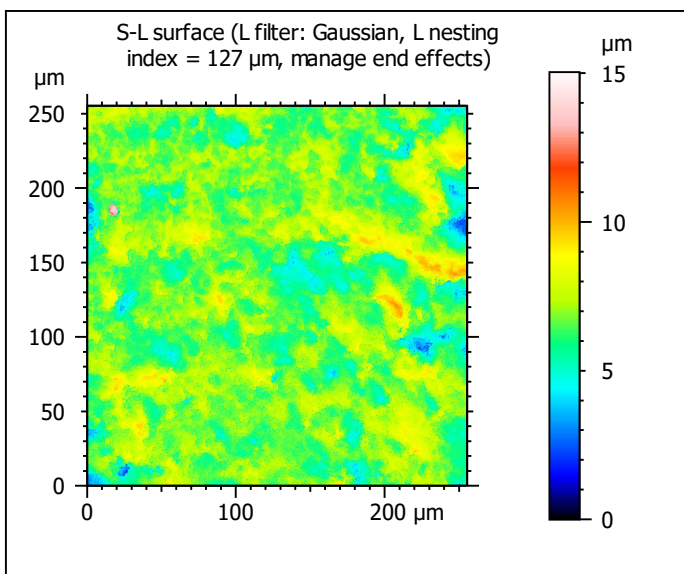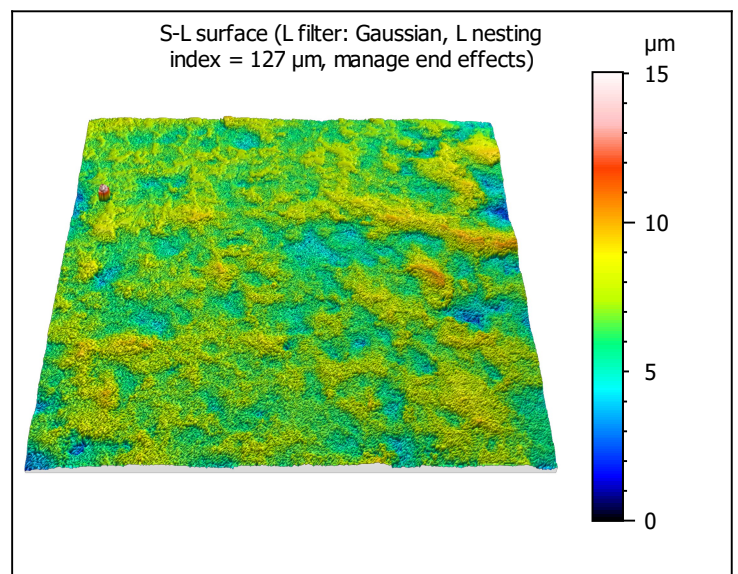



| ISO 25178                    |        |                                  |
|------------------------------|--------|----------------------------------|
| Height Parameters            |        |                                  |
| Sq                           | 1.01   | μm                               |
| Ssk                          | -0.129 |                                  |
| Sku                          | 4.98   |                                  |
| Sp                           | 8.29   | μm                               |
| Sv                           | 6.75   | μm                               |
| Sz                           | 15.0   | μm                               |
| Sa                           | 0.757  | μm                               |
| Functional Parameters        |        |                                  |
| Smr                          | 0.0035 | %                                |
| Smc                          | 1.18   | μm                               |
| Sxp                          | 2.17   | μm                               |
| Spatial Parameters           |        |                                  |
| Sal                          | 10.9   | μm                               |
| Str                          | 0.766  |                                  |
| Std                          | 130    | °                                |
| Hybrid Parameters            |        |                                  |
| Sdq                          | 1.94   |                                  |
| Sdr                          | 90.3   | %                                |
| Functional Parameters (V...) |        |                                  |
| Vm                           | 0.057  | μm <sup>3</sup> /μm <sup>2</sup> |
| Vv                           | 1.24   | μm <sup>3</sup> /μm <sup>2</sup> |
| Vmp                          | 0.057  | μm <sup>3</sup> /μm <sup>2</sup> |
| Vmc                          | 0.807  | μm <sup>3</sup> /μm <sup>2</sup> |
| Vvc                          | 1.10   | μm <sup>3</sup> /μm <sup>2</sup> |
| Vvv                          | 0.138  | μm <sup>3</sup> /μm <sup>2</sup> |
| Functional Parameters (S...) |        |                                  |
| Sk                           | 1.99   | μm                               |
| Spk                          | 0.998  | μm                               |
| Svk                          | 1.12   | μm                               |
| Smr1                         | 10.0   | %                                |
| Smr2                         | 88.1   | %                                |
| Spq                          | *****  |                                  |
| Svq                          | *****  |                                  |
| Smq                          | *****  |                                  |

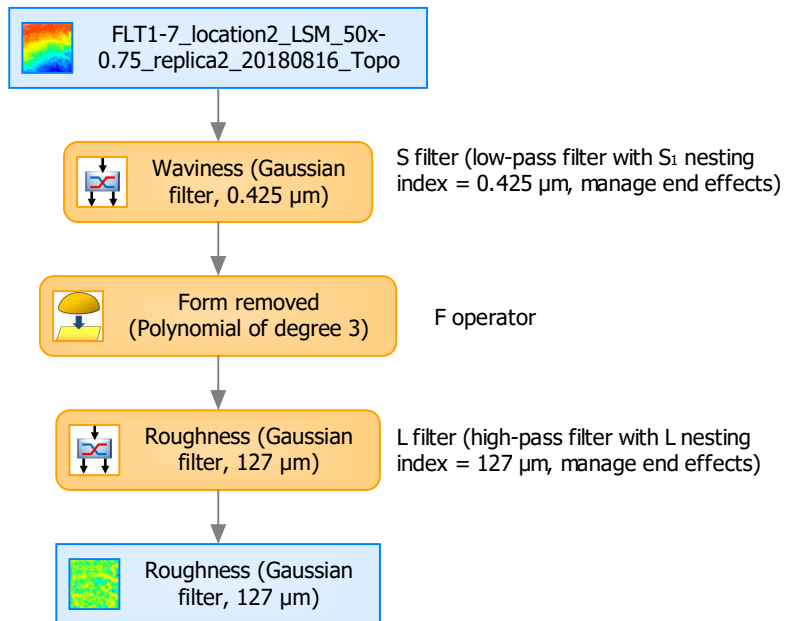

**Flint FLT1-7**  
**50x objective, NA = 0.75 or 0.95**

| Identity card - FLT1-7_location2_LSM_50x-... |                                                |               |  |
|----------------------------------------------|------------------------------------------------|---------------|--|
| Name:                                        | FLT1-7_location2_LSM_50x-0.75_replica3_2018... |               |  |
| Created on:                                  | 8/16/2018 4:28:37 PM                           |               |  |
| <b>Axis: X</b>                               |                                                |               |  |
| Length:                                      | 255                                            | $\mu\text{m}$ |  |
| Size:                                        | 3000                                           | points        |  |
| Spacing:                                     | 85.2                                           | nm            |  |
| <b>Axis: Y</b>                               |                                                |               |  |
| Length:                                      | 255                                            | $\mu\text{m}$ |  |
| Size:                                        | 3000                                           | points        |  |
| Spacing:                                     | 85.2                                           | nm            |  |
| <b>Axis: Z</b>                               |                                                |               |  |
| Length:                                      | 34.1                                           | $\mu\text{m}$ |  |
| Size:                                        | 65532                                          | digits        |  |
| Spacing:                                     | 0.521                                          | nm            |  |
| NMP ratio:                                   | 0.00 % (0 Pts)                                 |               |  |

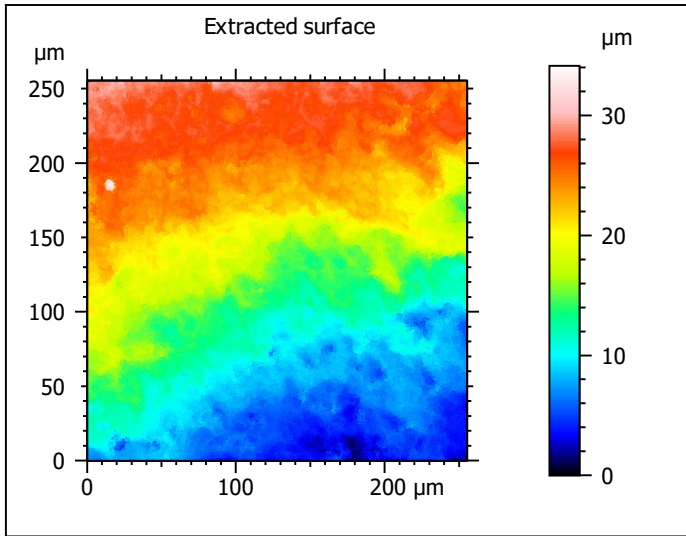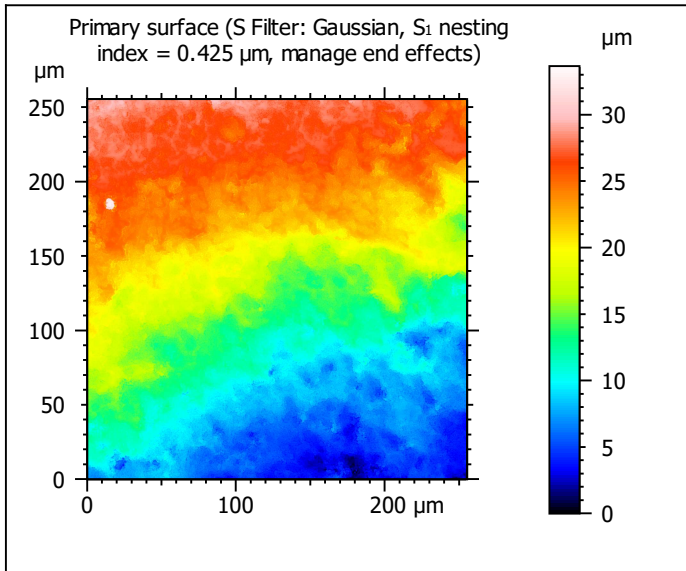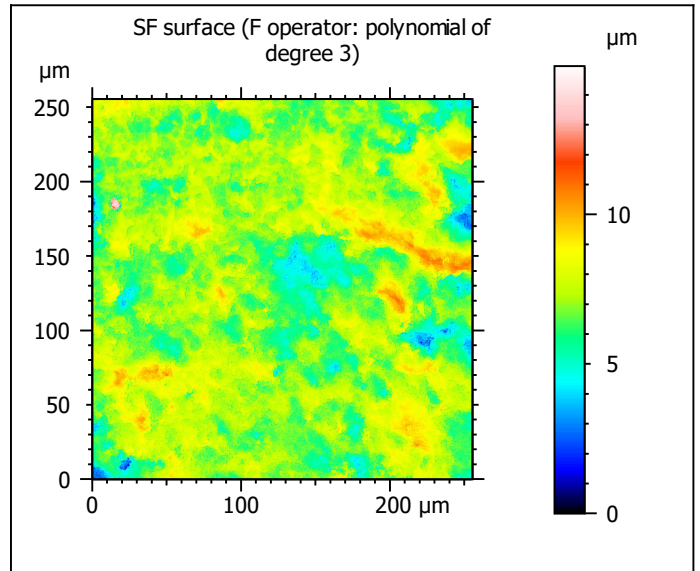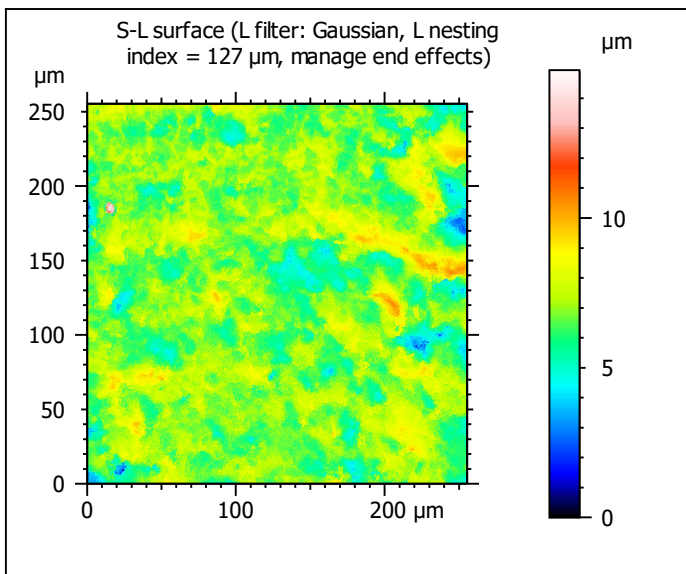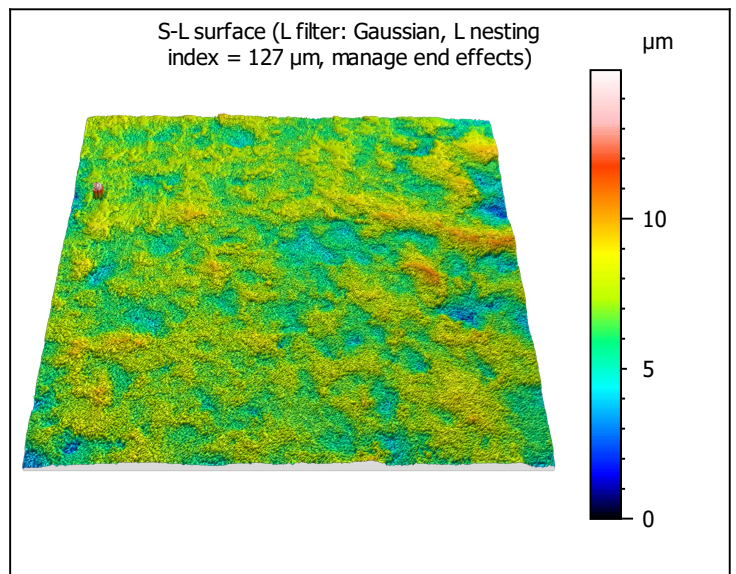

| ISO 25178                             |                                      |
|---------------------------------------|--------------------------------------|
| <b>Height Parameters</b>              |                                      |
| Sq                                    | 1.01 $\mu\text{m}$                   |
| Ssk                                   | -0.109                               |
| Sku                                   | 4.87                                 |
| Sp                                    | 8.09 $\mu\text{m}$                   |
| Sv                                    | 6.86 $\mu\text{m}$                   |
| Sz                                    | 14.9 $\mu\text{m}$                   |
| Sa                                    | 0.763 $\mu\text{m}$                  |
| <b>Functional Parameters</b>          |                                      |
| Smr                                   | 0.00638 %                            |
| Smc                                   | 1.19 $\mu\text{m}$                   |
| Sxp                                   | 2.17 $\mu\text{m}$                   |
| <b>Spatial Parameters</b>             |                                      |
| Sal                                   | 10.9 $\mu\text{m}$                   |
| Str                                   | 0.738                                |
| Std                                   | 130 $^{\circ}$                       |
| <b>Hybrid Parameters</b>              |                                      |
| Sdq                                   | 1.94                                 |
| Sdr                                   | 90.7 %                               |
| <b>Functional Parameters (Vol...)</b> |                                      |
| Vm                                    | 0.0583 $\mu\text{m}^3/\mu\text{m}^2$ |
| Vv                                    | 1.25 $\mu\text{m}^3/\mu\text{m}^2$   |
| Vmp                                   | 0.0583 $\mu\text{m}^3/\mu\text{m}^2$ |
| Vmc                                   | 0.814 $\mu\text{m}^3/\mu\text{m}^2$  |
| Vvc                                   | 1.11 $\mu\text{m}^3/\mu\text{m}^2$   |
| Vvv                                   | 0.138 $\mu\text{m}^3/\mu\text{m}^2$  |
| <b>Functional Parameters (Str...)</b> |                                      |
| Sk                                    | 2.01 $\mu\text{m}$                   |
| Spk                                   | 1.02 $\mu\text{m}$                   |
| Svk                                   | 1.13 $\mu\text{m}$                   |
| Smr1                                  | 9.96 %                               |
| Smr2                                  | 88.2 %                               |
| Spq                                   | *****                                |
| Svq                                   | *****                                |
| Smq                                   | *****                                |

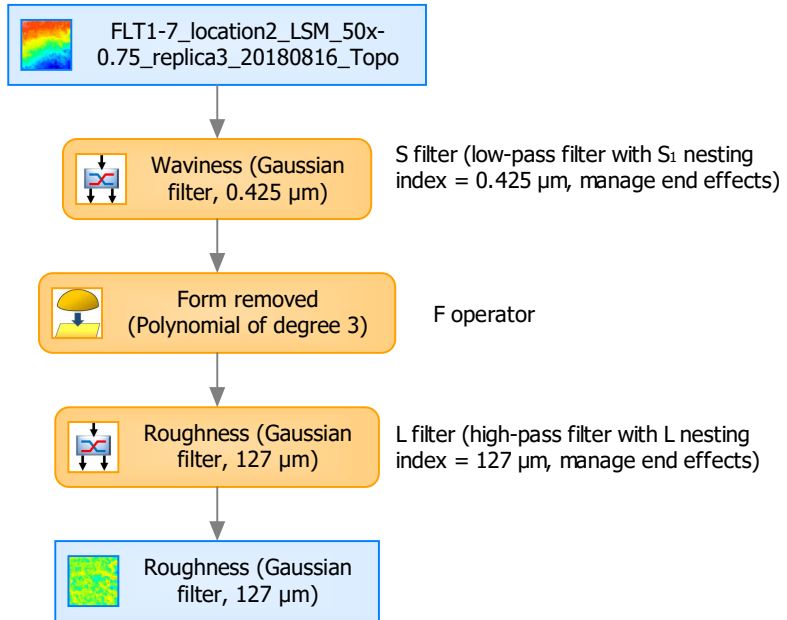

**Flint FLT1-7**  
**50x objective, NA = 0.75 or 0.95**

| Identity card - FLT1-7_location2_LSM_50x-... |                                                |               |  |
|----------------------------------------------|------------------------------------------------|---------------|--|
| Name:                                        | FLT1-7_location2_LSM_50x-0.95_replica1_2018... |               |  |
| Created on:                                  | 8/16/2018 3:22:20 PM                           |               |  |
| <b>Axis: X</b>                               |                                                |               |  |
| Length:                                      | 255                                            | $\mu\text{m}$ |  |
| Size:                                        | 3000                                           | points        |  |
| Spacing:                                     | 85.2                                           | nm            |  |
| <b>Axis: Y</b>                               |                                                |               |  |
| Length:                                      | 255                                            | $\mu\text{m}$ |  |
| Size:                                        | 3000                                           | points        |  |
| Spacing:                                     | 85.2                                           | nm            |  |
| <b>Axis: Z</b>                               |                                                |               |  |
| Length:                                      | 33.6                                           | $\mu\text{m}$ |  |
| Size:                                        | 65532                                          | digits        |  |
| Spacing:                                     | 0.512                                          | nm            |  |
| NMP ratio:                                   | 0.00 % (0 Pts)                                 |               |  |

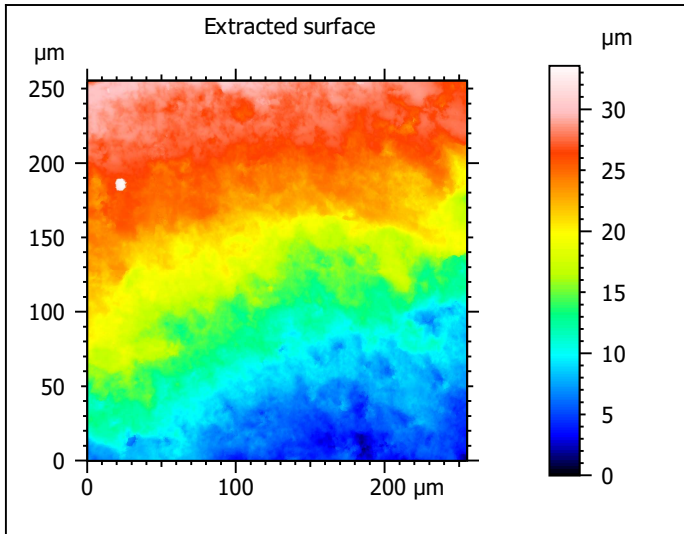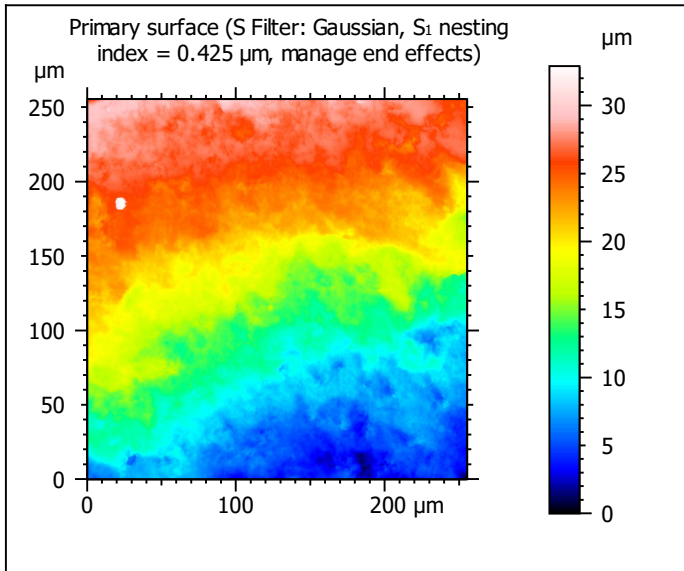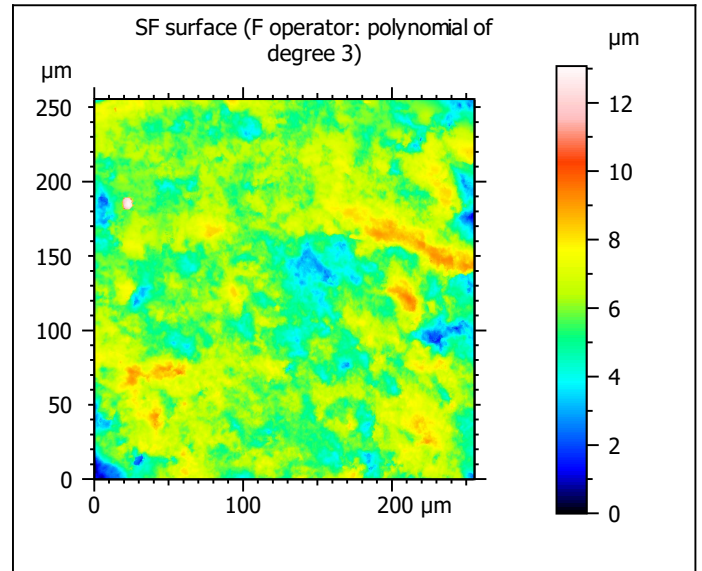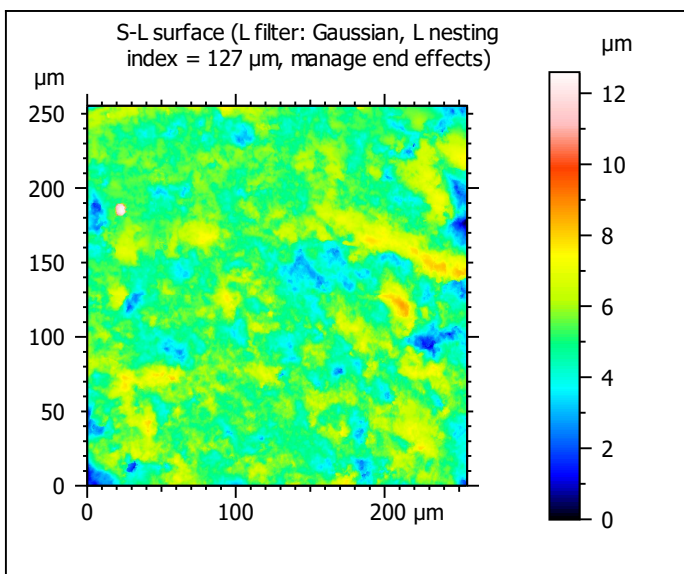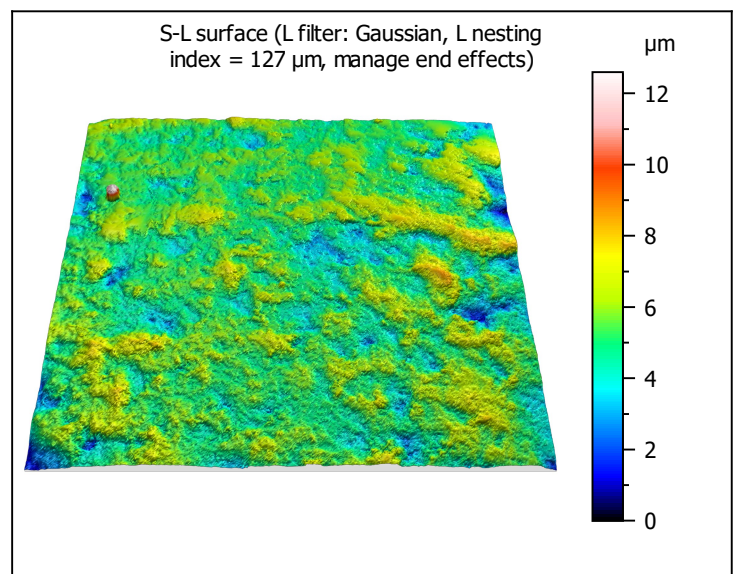

| ISO 25178                          |         |                                  |
|------------------------------------|---------|----------------------------------|
| <b>Height Parameters</b>           |         |                                  |
| Sq                                 | 0.930   | μm                               |
| Ssk                                | -0.0849 |                                  |
| Sku                                | 5.76    |                                  |
| Sp                                 | 7.38    | μm                               |
| Sv                                 | 5.22    | μm                               |
| Sz                                 | 12.6    | μm                               |
| Sa                                 | 0.689   | μm                               |
| <b>Functional Parameters</b>       |         |                                  |
| Smr                                | 0.0454  | %                                |
| Smc                                | 1.08    | μm                               |
| Sxp                                | 2.04    | μm                               |
| <b>Spatial Parameters</b>          |         |                                  |
| Sal                                | 11.4    | μm                               |
| Str                                | 0.780   |                                  |
| Std                                | 176     | °                                |
| <b>Hybrid Parameters</b>           |         |                                  |
| Sdq                                | 0.858   |                                  |
| Sdr                                | 22.2    | %                                |
| <b>Functional Parameters (V...</b> |         |                                  |
| Vm                                 | 0.0537  | μm <sup>3</sup> /μm <sup>2</sup> |
| Vv                                 | 1.13    | μm <sup>3</sup> /μm <sup>2</sup> |
| Vmp                                | 0.0537  | μm <sup>3</sup> /μm <sup>2</sup> |
| Vmc                                | 0.728   | μm <sup>3</sup> /μm <sup>2</sup> |
| Vvc                                | 0.999   | μm <sup>3</sup> /μm <sup>2</sup> |
| Vvv                                | 0.132   | μm <sup>3</sup> /μm <sup>2</sup> |
| <b>Functional Parameters (S...</b> |         |                                  |
| Sk                                 | 1.72    | μm                               |
| Spk                                | 0.962   | μm                               |
| Svk                                | 1.03    | μm                               |
| Smr1                               | 10.5    | %                                |
| Smr2                               | 87.3    | %                                |
| Spq                                | *****   |                                  |
| Svq                                | *****   |                                  |
| Smq                                | *****   |                                  |

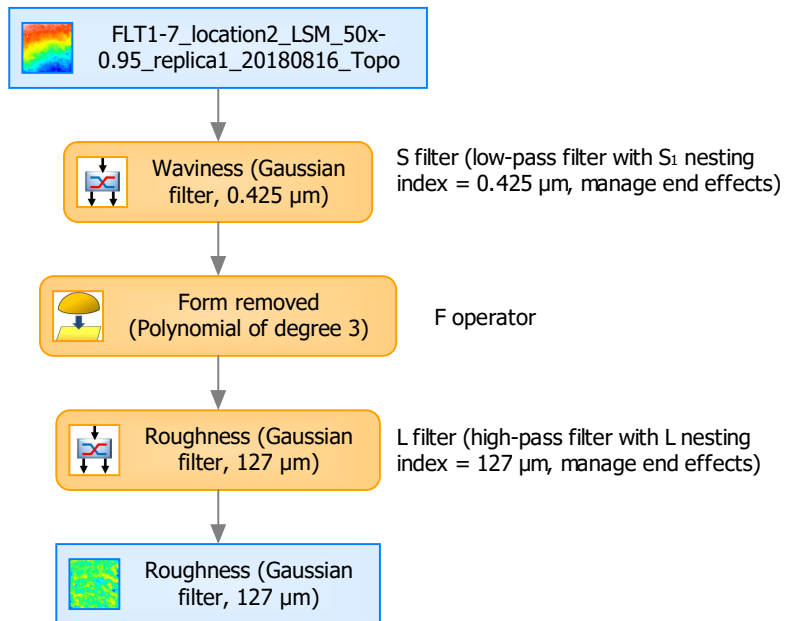

**Flint FLT1-7**  
**50x objective, NA = 0.75 or 0.95**

| Identity card - FLT1-7_location2_LSM_50x-... |                                                |               |  |
|----------------------------------------------|------------------------------------------------|---------------|--|
| Name:                                        | FLT1-7_location2_LSM_50x-0.95_replica2_2018... |               |  |
| Created on:                                  | 8/16/2018 3:49:58 PM                           |               |  |
| <b>Axis: X</b>                               |                                                |               |  |
| Length:                                      | 255                                            | $\mu\text{m}$ |  |
| Size:                                        | 3000                                           | points        |  |
| Spacing:                                     | 85.2                                           | nm            |  |
| <b>Axis: Y</b>                               |                                                |               |  |
| Length:                                      | 255                                            | $\mu\text{m}$ |  |
| Size:                                        | 3000                                           | points        |  |
| Spacing:                                     | 85.2                                           | nm            |  |
| <b>Axis: Z</b>                               |                                                |               |  |
| Length:                                      | 33.7                                           | $\mu\text{m}$ |  |
| Size:                                        | 65532                                          | digits        |  |
| Spacing:                                     | 0.514                                          | nm            |  |
| NMP ratio:                                   | 0.00 % (0 Pts)                                 |               |  |

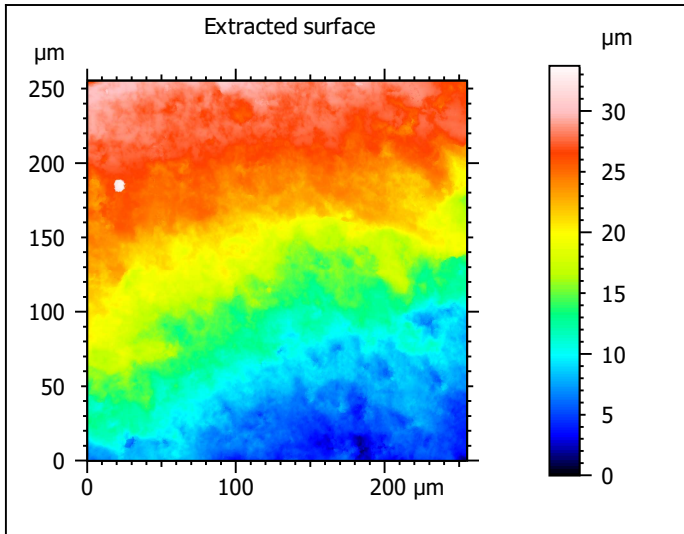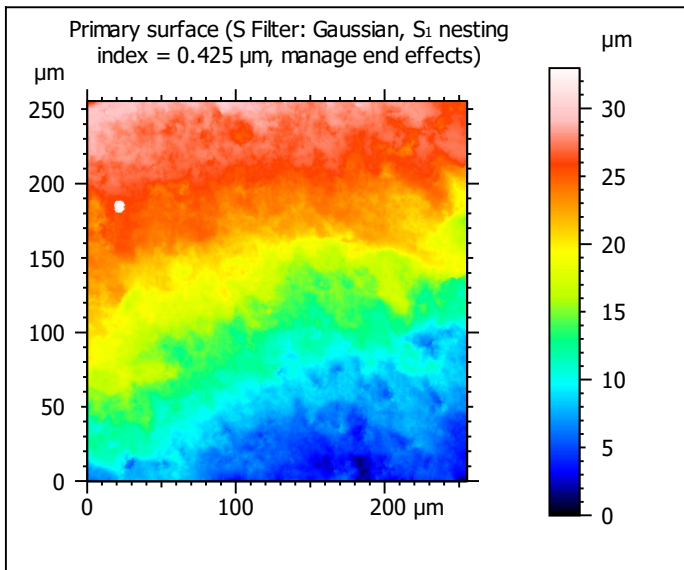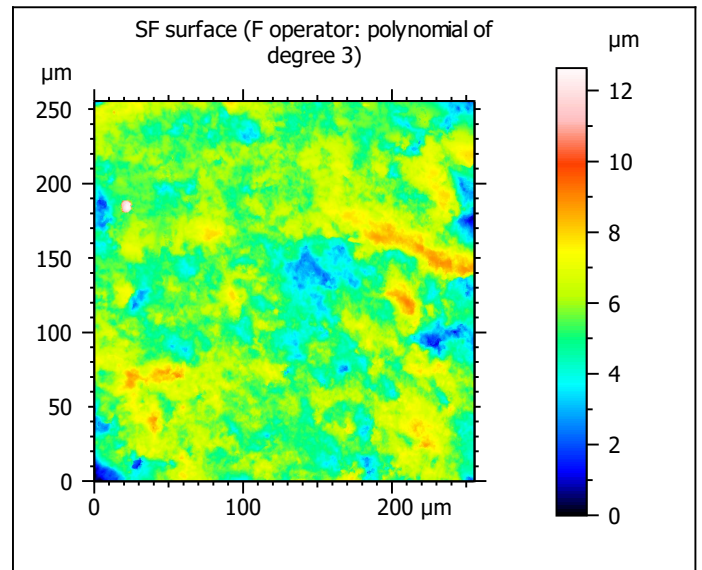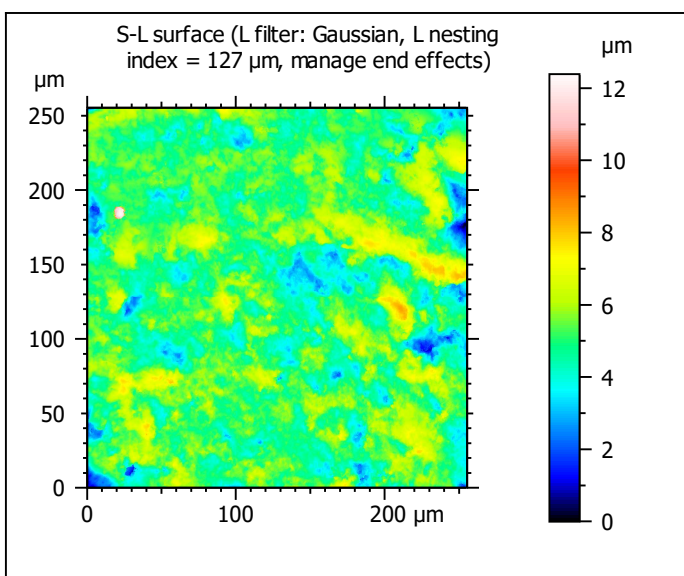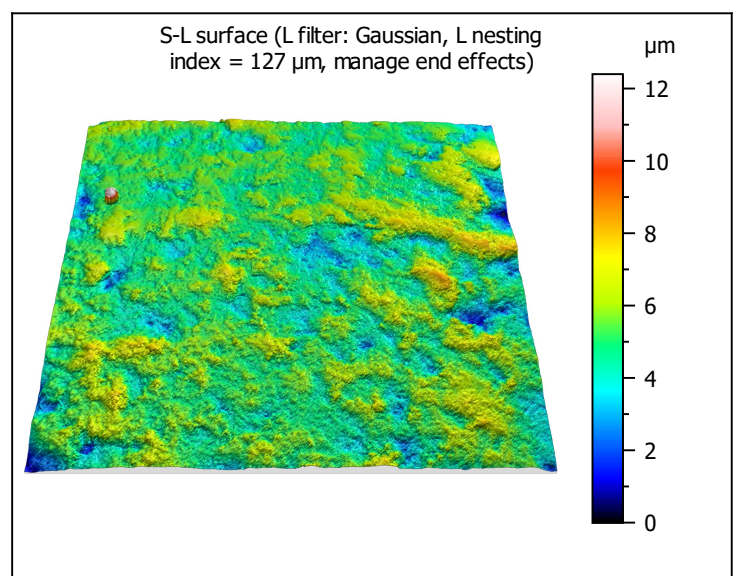

| ISO 25178                           |         |                                  |
|-------------------------------------|---------|----------------------------------|
| <b>Height Parameters</b>            |         |                                  |
| Sq                                  | 0.931   | μm                               |
| Ssk                                 | -0.0815 |                                  |
| Sku                                 | 5.73    |                                  |
| Sp                                  | 7.31    | μm                               |
| Sv                                  | 5.09    | μm                               |
| Sz                                  | 12.4    | μm                               |
| Sa                                  | 0.689   | μm                               |
| <b>Functional Parameters</b>        |         |                                  |
| Smr                                 | 0.046   | %                                |
| Smc                                 | 1.08    | μm                               |
| Sxp                                 | 2.04    | μm                               |
| <b>Spatial Parameters</b>           |         |                                  |
| Sal                                 | 11.5    | μm                               |
| Str                                 | 0.782   |                                  |
| Std                                 | 130     | °                                |
| <b>Hybrid Parameters</b>            |         |                                  |
| Sdq                                 | 0.852   |                                  |
| Sdr                                 | 22.1    | %                                |
| <b>Functional Parameters (V...)</b> |         |                                  |
| Vm                                  | 0.0543  | μm <sup>3</sup> /μm <sup>2</sup> |
| Vv                                  | 1.13    | μm <sup>3</sup> /μm <sup>2</sup> |
| Vmp                                 | 0.0543  | μm <sup>3</sup> /μm <sup>2</sup> |
| Vmc                                 | 0.728   | μm <sup>3</sup> /μm <sup>2</sup> |
| Vvc                                 | 1.00    | μm <sup>3</sup> /μm <sup>2</sup> |
| Vvv                                 | 0.132   | μm <sup>3</sup> /μm <sup>2</sup> |
| <b>Functional Parameters (S...)</b> |         |                                  |
| Sk                                  | 1.72    | μm                               |
| Spk                                 | 0.965   | μm                               |
| Svk                                 | 1.03    | μm                               |
| Smr1                                | 10.5    | %                                |
| Smr2                                | 87.3    | %                                |
| Spq                                 | *****   |                                  |
| Svq                                 | *****   |                                  |
| Smq                                 | *****   |                                  |

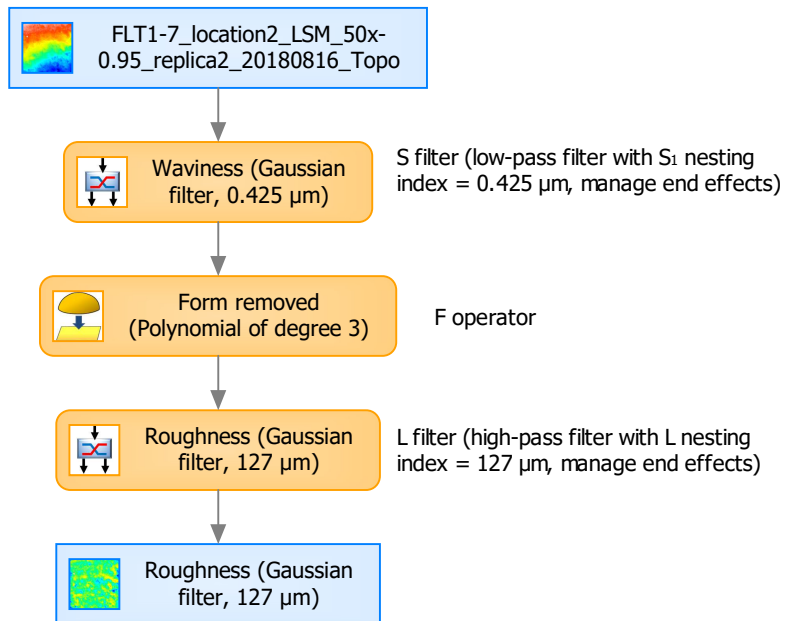

**Flint FLT1-7**  
**50x objective, NA = 0.75 or 0.95**

| Identity card - FLT1-7_location2_LSM_50x-... |                                                |               |  |
|----------------------------------------------|------------------------------------------------|---------------|--|
| Name:                                        | FLT1-7_location2_LSM_50x-0.95_replica3_2018... |               |  |
| Created on:                                  | 8/16/2018 4:17:09 PM                           |               |  |
| <b>Axis: X</b>                               |                                                |               |  |
| Length:                                      | 255                                            | $\mu\text{m}$ |  |
| Size:                                        | 3000                                           | points        |  |
| Spacing:                                     | 85.2                                           | nm            |  |
| <b>Axis: Y</b>                               |                                                |               |  |
| Length:                                      | 255                                            | $\mu\text{m}$ |  |
| Size:                                        | 3000                                           | points        |  |
| Spacing:                                     | 85.2                                           | nm            |  |
| <b>Axis: Z</b>                               |                                                |               |  |
| Length:                                      | 33.7                                           | $\mu\text{m}$ |  |
| Size:                                        | 65532                                          | digits        |  |
| Spacing:                                     | 0.515                                          | nm            |  |
| NMP ratio:                                   | 0.00 % (0 Pts)                                 |               |  |

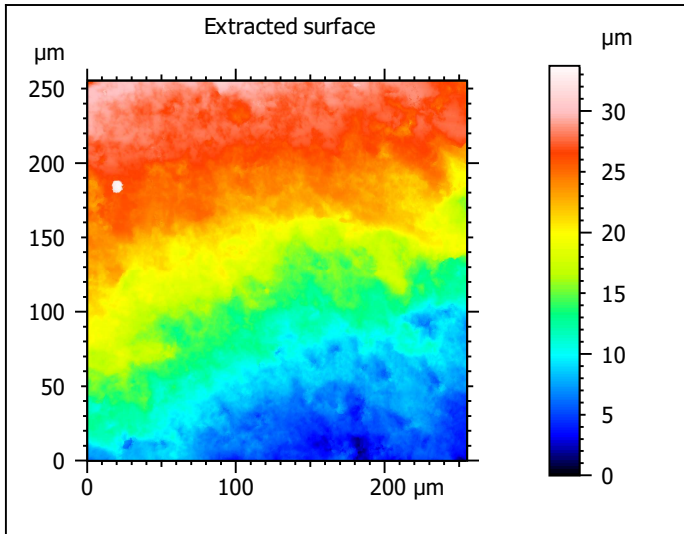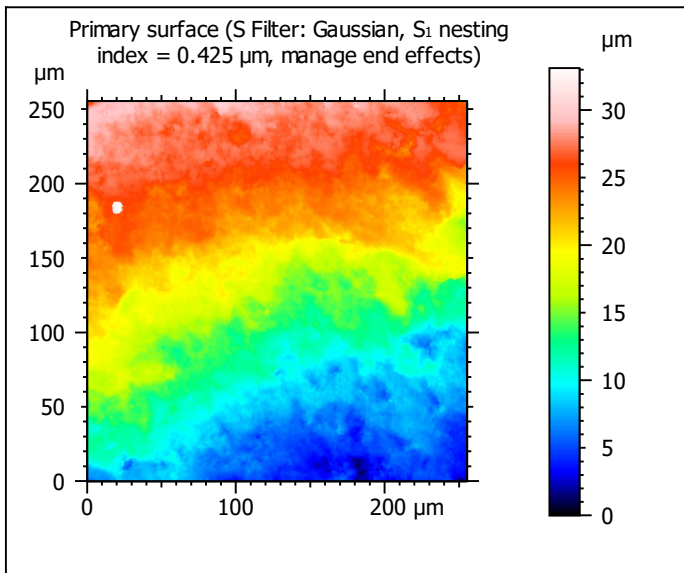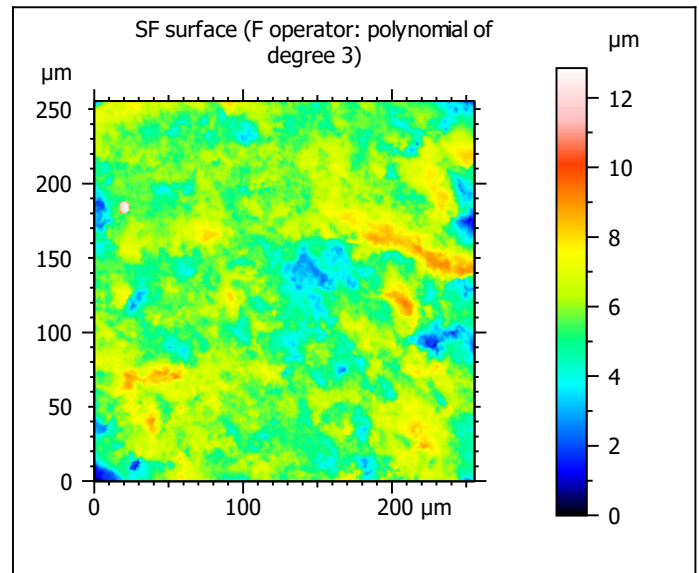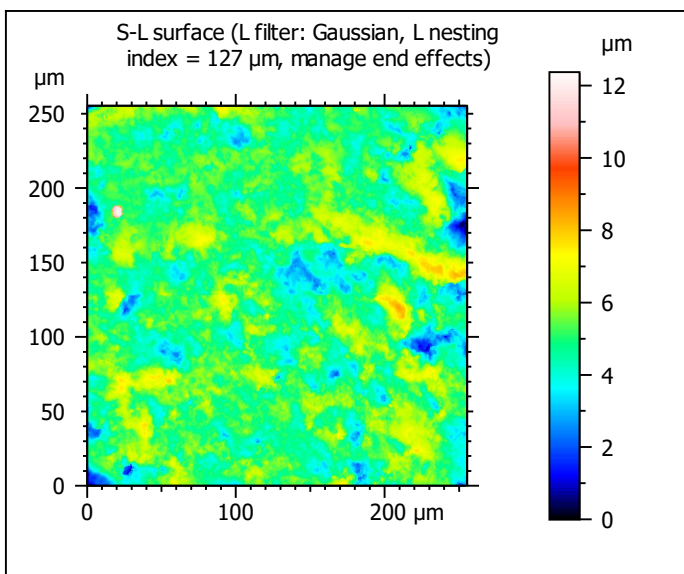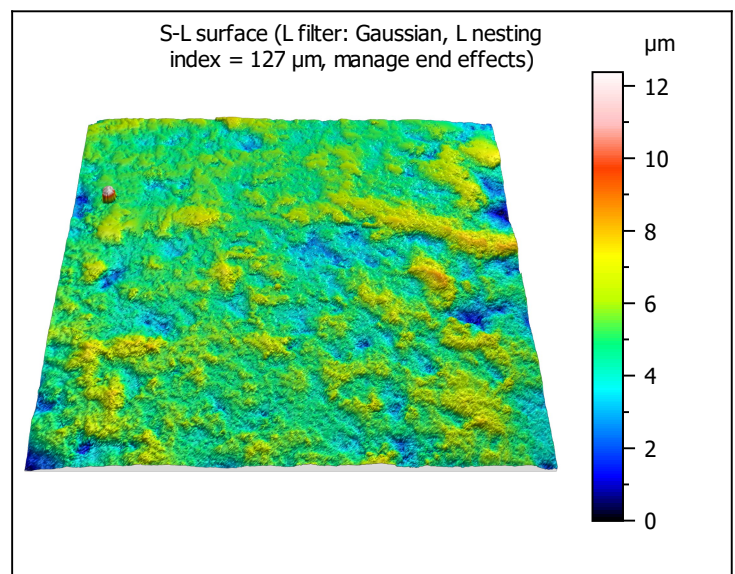



| ISO 25178                           |         |                                  |
|-------------------------------------|---------|----------------------------------|
| <b>Height Parameters</b>            |         |                                  |
| Sq                                  | 0.937   | μm                               |
| Ssk                                 | -0.0634 |                                  |
| Sku                                 | 5.76    |                                  |
| Sp                                  | 7.37    | μm                               |
| Sv                                  | 5.01    | μm                               |
| Sz                                  | 12.4    | μm                               |
| Sa                                  | 0.693   | μm                               |
| <b>Functional Parameters</b>        |         |                                  |
| Smr                                 | 0.0458  | %                                |
| Smc                                 | 1.09    | μm                               |
| Sxp                                 | 2.04    | μm                               |
| <b>Spatial Parameters</b>           |         |                                  |
| Sal                                 | 11.5    | μm                               |
| Str                                 | 0.773   |                                  |
| Std                                 | 130     | °                                |
| <b>Hybrid Parameters</b>            |         |                                  |
| Sdq                                 | 0.860   |                                  |
| Sdr                                 | 22.3    | %                                |
| <b>Functional Parameters (V...)</b> |         |                                  |
| Vm                                  | 0.0554  | μm <sup>3</sup> /μm <sup>2</sup> |
| Vv                                  | 1.14    | μm <sup>3</sup> /μm <sup>2</sup> |
| Vmp                                 | 0.0554  | μm <sup>3</sup> /μm <sup>2</sup> |
| Vmc                                 | 0.730   | μm <sup>3</sup> /μm <sup>2</sup> |
| Vvc                                 | 1.01    | μm <sup>3</sup> /μm <sup>2</sup> |
| Vvv                                 | 0.132   | μm <sup>3</sup> /μm <sup>2</sup> |
| <b>Functional Parameters (S...)</b> |         |                                  |
| Sk                                  | 1.73    | μm                               |
| Spk                                 | 0.980   | μm                               |
| Svk                                 | 1.04    | μm                               |
| Smr1                                | 10.4    | %                                |
| Smr2                                | 87.5    | %                                |
| Spq                                 | *****   |                                  |
| Svq                                 | *****   |                                  |
| Smq                                 | *****   |                                  |

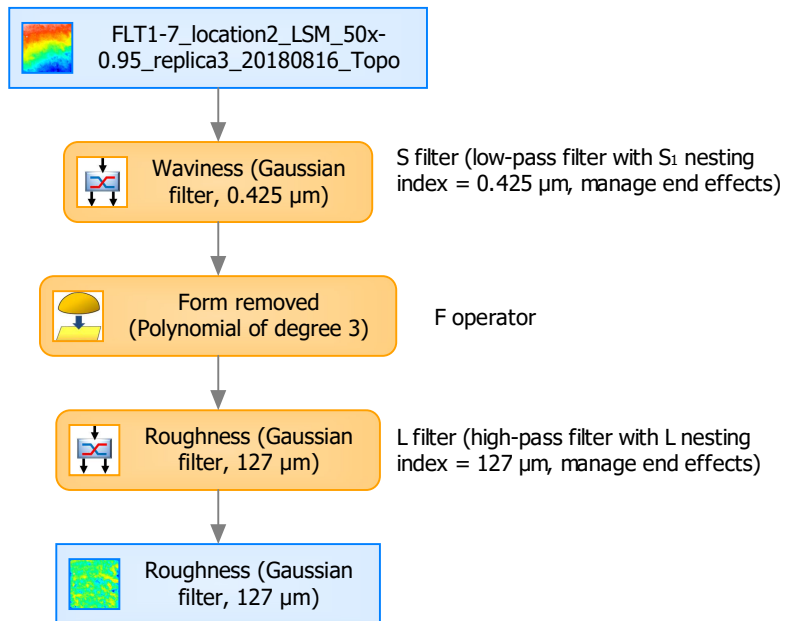

**Flint FLT1-7**  
**50x objective, NA = 0.75 or 0.95**

| Identity card - FLT1-7_location3_LSM_50x-... |                                                |               |  |
|----------------------------------------------|------------------------------------------------|---------------|--|
| Name:                                        | FLT1-7_location3_LSM_50x-0.75_replica1_2018... |               |  |
| Created on:                                  | 8/20/2018 11:31:12 AM                          |               |  |
| <b>Axis: X</b>                               |                                                |               |  |
| Length:                                      | 255                                            | $\mu\text{m}$ |  |
| Size:                                        | 3000                                           | points        |  |
| Spacing:                                     | 85.2                                           | nm            |  |
| <b>Axis: Y</b>                               |                                                |               |  |
| Length:                                      | 255                                            | $\mu\text{m}$ |  |
| Size:                                        | 3000                                           | points        |  |
| Spacing:                                     | 85.2                                           | nm            |  |
| <b>Axis: Z</b>                               |                                                |               |  |
| Length:                                      | 15.9                                           | $\mu\text{m}$ |  |
| Size:                                        | 65532                                          | digits        |  |
| Spacing:                                     | 0.243                                          | nm            |  |
| NMP ratio:                                   | 0.00 % (0 Pts)                                 |               |  |

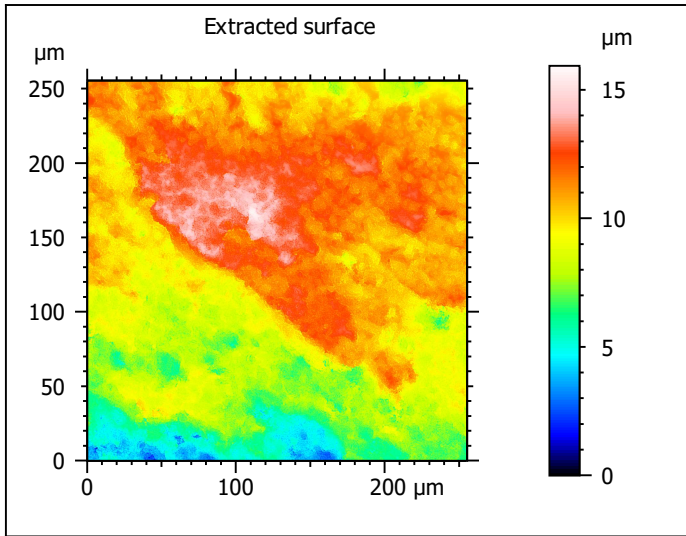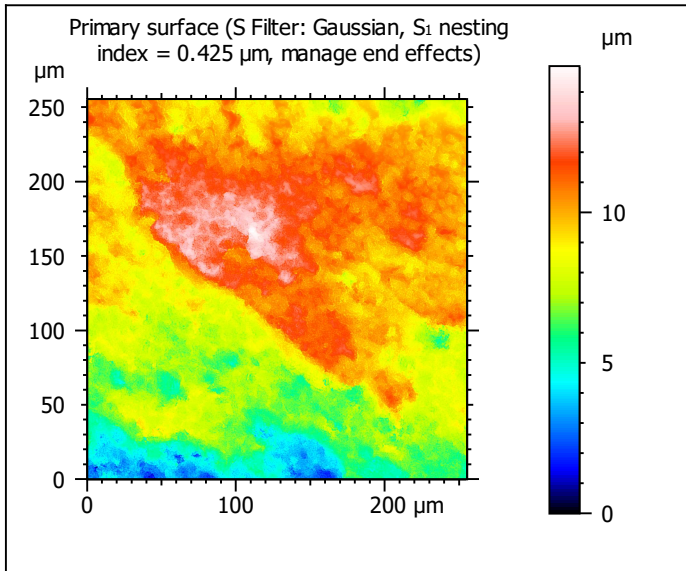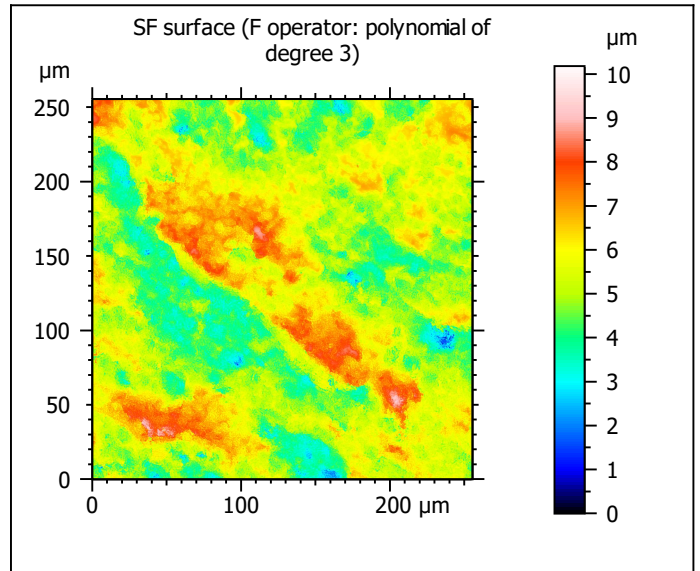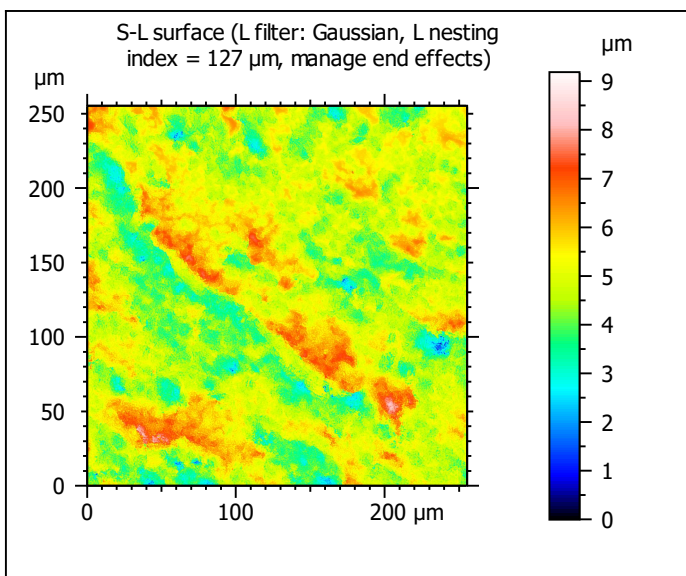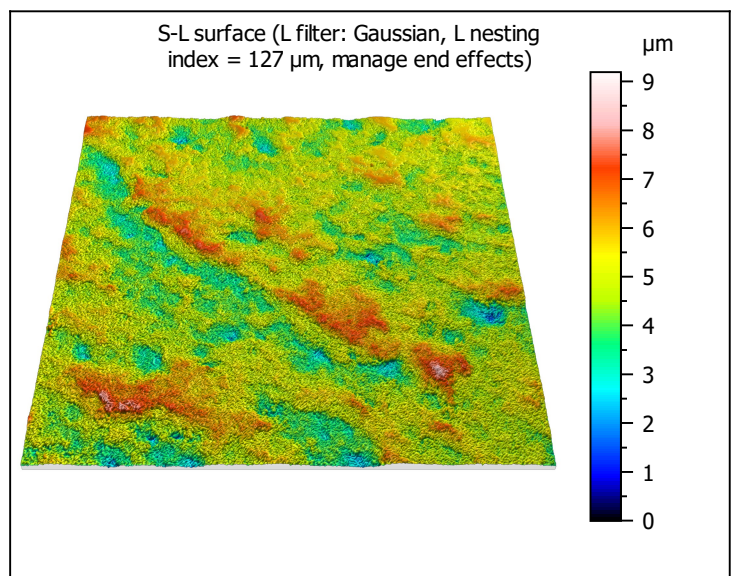

| ISO 25178                          |        |                                  |
|------------------------------------|--------|----------------------------------|
| <b>Height Parameters</b>           |        |                                  |
| Sq                                 | 0.855  | μm                               |
| Ssk                                | 0.123  |                                  |
| Sku                                | 3.40   |                                  |
| Sp                                 | 4.32   | μm                               |
| Sv                                 | 4.87   | μm                               |
| Sz                                 | 9.19   | μm                               |
| Sa                                 | 0.667  | μm                               |
| <b>Functional Parameters</b>       |        |                                  |
| Smr                                | 0.0111 | %                                |
| Smc                                | 1.10   | μm                               |
| Sxp                                | 1.62   | μm                               |
| <b>Spatial Parameters</b>          |        |                                  |
| Sal                                | 11.8   | μm                               |
| Str                                | 0.403  |                                  |
| Std                                | 141    | °                                |
| <b>Hybrid Parameters</b>           |        |                                  |
| Sdq                                | 1.64   |                                  |
| Sdr                                | 72.3   | %                                |
| <b>Functional Parameters (V...</b> |        |                                  |
| Vm                                 | 0.0469 | μm <sup>3</sup> /μm <sup>2</sup> |
| Vv                                 | 1.15   | μm <sup>3</sup> /μm <sup>2</sup> |
| Vmp                                | 0.0469 | μm <sup>3</sup> /μm <sup>2</sup> |
| Vmc                                | 0.734  | μm <sup>3</sup> /μm <sup>2</sup> |
| Vvc                                | 1.05   | μm <sup>3</sup> /μm <sup>2</sup> |
| Vvv                                | 0.096  | μm <sup>3</sup> /μm <sup>2</sup> |
| <b>Functional Parameters (S...</b> |        |                                  |
| Sk                                 | 1.62   | μm                               |
| Spk                                | 0.781  | μm                               |
| Svk                                | 0.808  | μm                               |
| Smr1                               | 11.1   | %                                |
| Smr2                               | 89.0   | %                                |
| Spq                                | *****  |                                  |
| Svq                                | *****  |                                  |
| Smq                                | *****  |                                  |

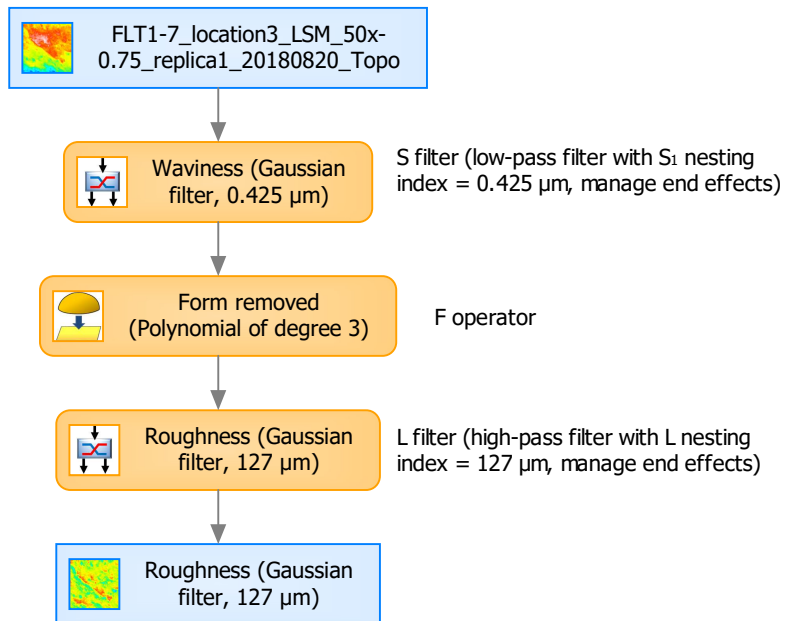

**Flint FLT1-7**  
**50x objective, NA = 0.75 or 0.95**

| Identity card - FLT1-7_location3_LSM_50x-... |                                                |               |  |
|----------------------------------------------|------------------------------------------------|---------------|--|
| Name:                                        | FLT1-7_location3_LSM_50x-0.75_replica2_2018... |               |  |
| Created on:                                  | 8/20/2018 11:50:58 AM                          |               |  |
| <b>Axis: X</b>                               |                                                |               |  |
| Length:                                      | 255                                            | $\mu\text{m}$ |  |
| Size:                                        | 3000                                           | points        |  |
| Spacing:                                     | 85.2                                           | nm            |  |
| <b>Axis: Y</b>                               |                                                |               |  |
| Length:                                      | 255                                            | $\mu\text{m}$ |  |
| Size:                                        | 3000                                           | points        |  |
| Spacing:                                     | 85.2                                           | nm            |  |
| <b>Axis: Z</b>                               |                                                |               |  |
| Length:                                      | 16.1                                           | $\mu\text{m}$ |  |
| Size:                                        | 65532                                          | digits        |  |
| Spacing:                                     | 0.246                                          | nm            |  |
| NMP ratio:                                   | 0.00 % (0 Pts)                                 |               |  |

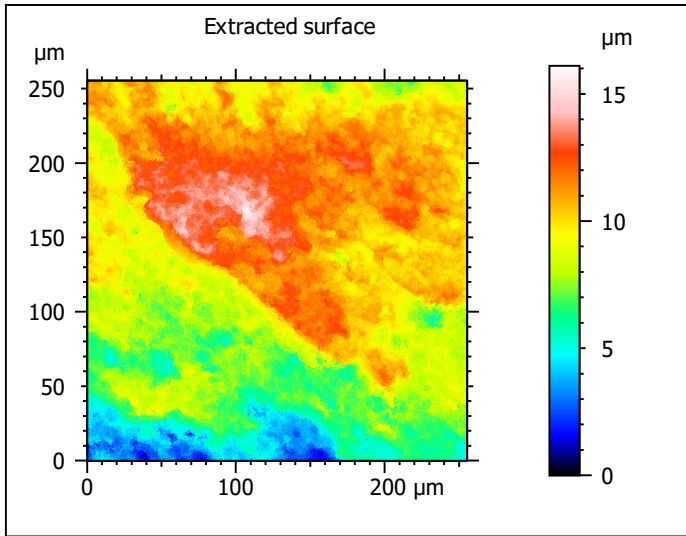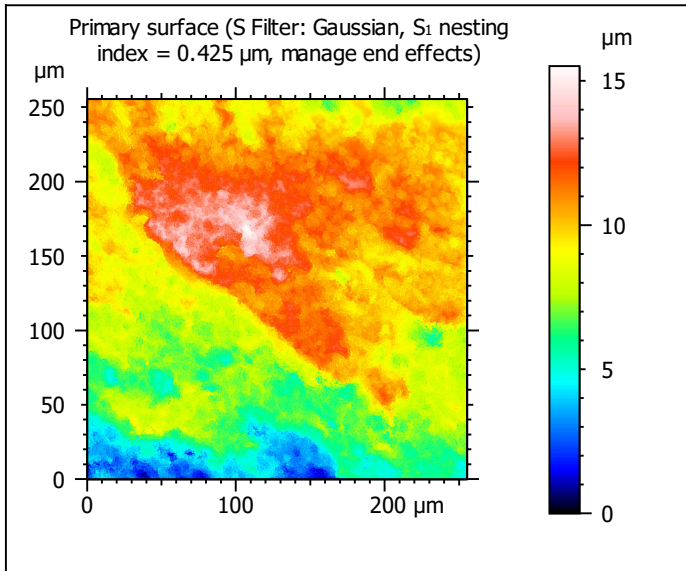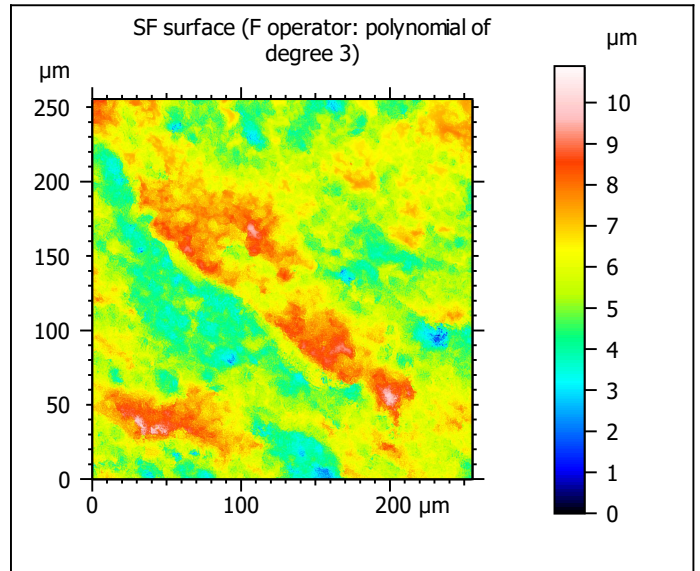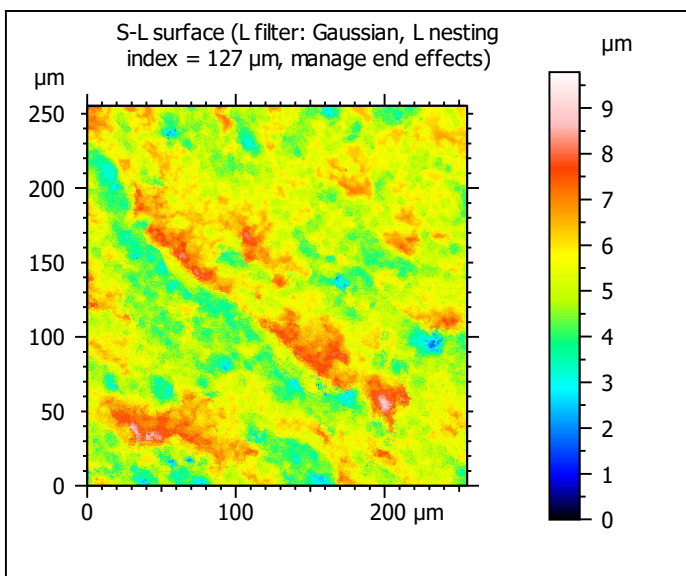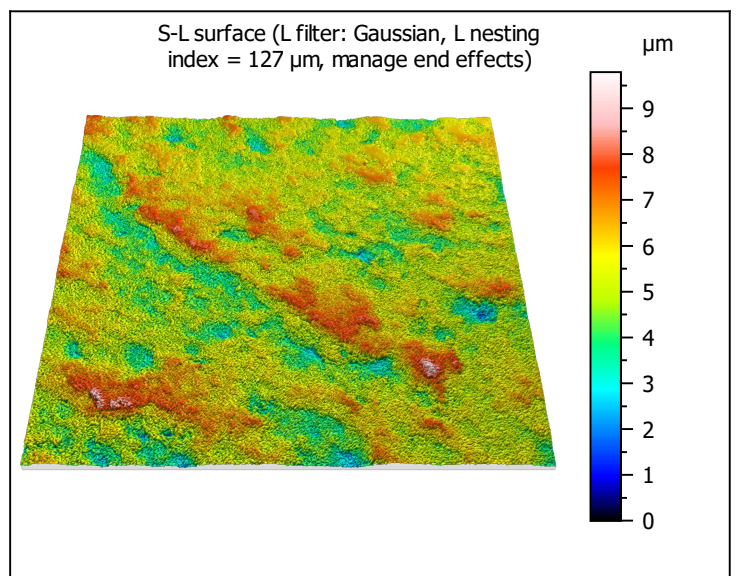

| ISO 25178                    |        |                                  |
|------------------------------|--------|----------------------------------|
| Height Parameters            |        |                                  |
| Sq                           | 0.932  | μm                               |
| Ssk                          | 0.112  |                                  |
| Sku                          | 3.42   |                                  |
| Sp                           | 4.47   | μm                               |
| Sv                           | 5.32   | μm                               |
| Sz                           | 9.79   | μm                               |
| Sa                           | 0.727  | μm                               |
| Functional Parameters        |        |                                  |
| Smr                          | 0.0339 | %                                |
| Smc                          | 1.19   | μm                               |
| Sxp                          | 1.78   | μm                               |
| Spatial Parameters           |        |                                  |
| Sal                          | 11.9   | μm                               |
| Str                          | 0.388  |                                  |
| Std                          | 141    | °                                |
| Hybrid Parameters            |        |                                  |
| Sdq                          | 1.78   |                                  |
| Sdr                          | 81.6   | %                                |
| Functional Parameters (V...) |        |                                  |
| Vm                           | 0.0516 | μm <sup>3</sup> /μm <sup>2</sup> |
| Vv                           | 1.25   | μm <sup>3</sup> /μm <sup>2</sup> |
| Vmp                          | 0.0516 | μm <sup>3</sup> /μm <sup>2</sup> |
| Vmc                          | 0.800  | μm <sup>3</sup> /μm <sup>2</sup> |
| Vvc                          | 1.14   | μm <sup>3</sup> /μm <sup>2</sup> |
| Vvv                          | 0.106  | μm <sup>3</sup> /μm <sup>2</sup> |
| Functional Parameters (S...) |        |                                  |
| Sk                           | 1.76   | μm                               |
| Spk                          | 0.852  | μm                               |
| Svk                          | 0.884  | μm                               |
| Smr1                         | 10.9   | %                                |
| Smr2                         | 88.9   | %                                |
| Spq                          | *****  |                                  |
| Svq                          | *****  |                                  |
| Smq                          | *****  |                                  |

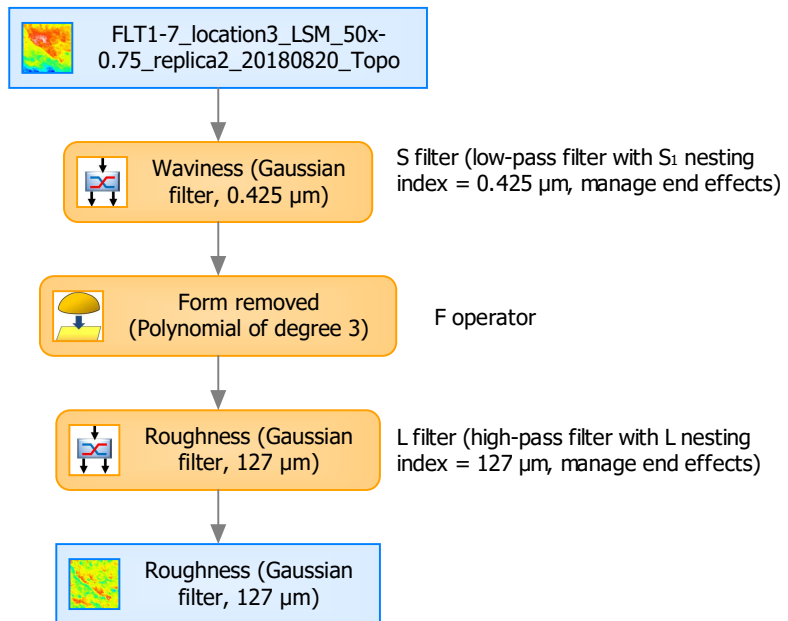

**Flint FLT1-7**  
**50x objective, NA = 0.75 or 0.95**

| Identity card - FLT1-7_location3_LSM_50x-... |                                                |               |  |
|----------------------------------------------|------------------------------------------------|---------------|--|
| Name:                                        | FLT1-7_location3_LSM_50x-0.75_replica3_2018... |               |  |
| Created on:                                  | 8/20/2018 12:05:22 PM                          |               |  |
| <b>Axis: X</b>                               |                                                |               |  |
| Length:                                      | 255                                            | $\mu\text{m}$ |  |
| Size:                                        | 3000                                           | points        |  |
| Spacing:                                     | 85.2                                           | nm            |  |
| <b>Axis: Y</b>                               |                                                |               |  |
| Length:                                      | 255                                            | $\mu\text{m}$ |  |
| Size:                                        | 3000                                           | points        |  |
| Spacing:                                     | 85.2                                           | nm            |  |
| <b>Axis: Z</b>                               |                                                |               |  |
| Length:                                      | 16.6                                           | $\mu\text{m}$ |  |
| Size:                                        | 65532                                          | digits        |  |
| Spacing:                                     | 0.253                                          | nm            |  |
| NMP ratio:                                   | 0.00 % (0 Pts)                                 |               |  |

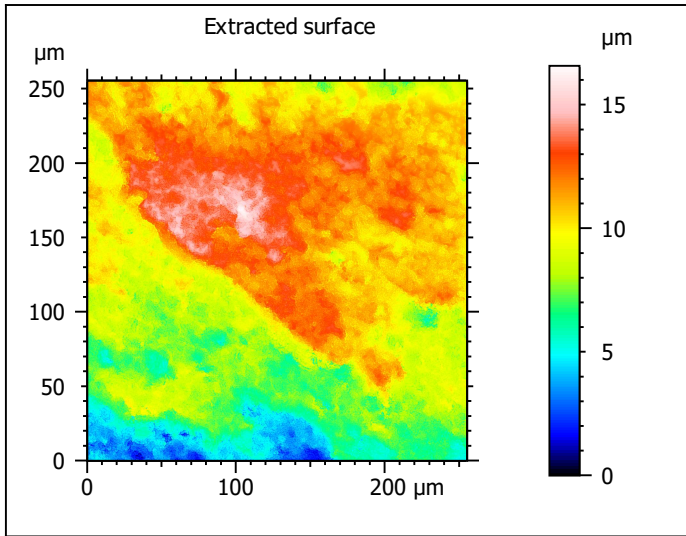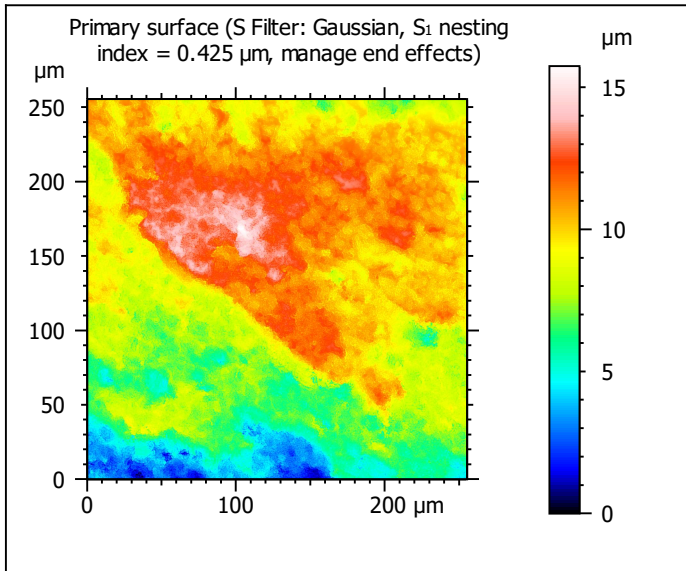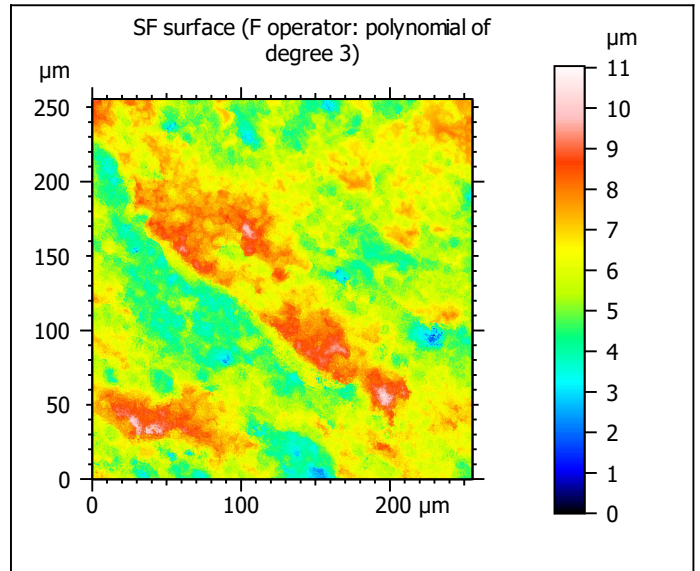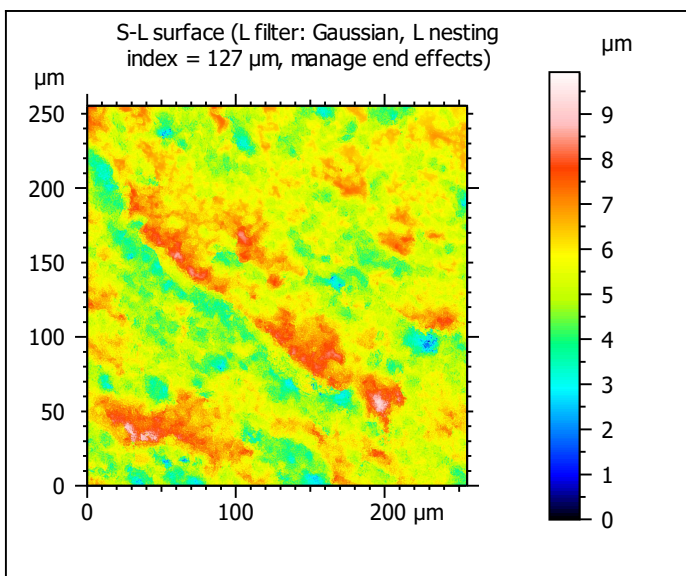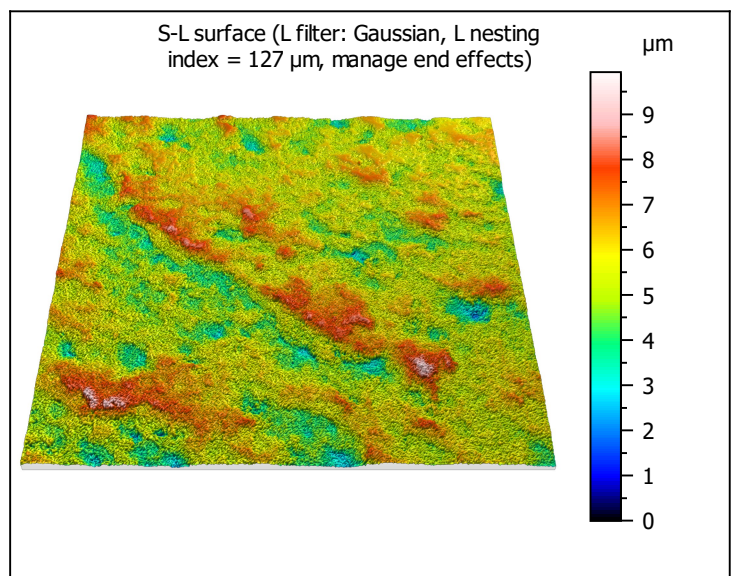

| ISO 25178                          |        |                                  |
|------------------------------------|--------|----------------------------------|
| <b>Height Parameters</b>           |        |                                  |
| Sq                                 | 0.955  | μm                               |
| Ssk                                | 0.108  |                                  |
| Sku                                | 3.42   |                                  |
| Sp                                 | 4.41   | μm                               |
| Sv                                 | 5.53   | μm                               |
| Sz                                 | 9.93   | μm                               |
| Sa                                 | 0.745  | μm                               |
| <b>Functional Parameters</b>       |        |                                  |
| Smr                                | 0.0677 | %                                |
| Smc                                | 1.22   | μm                               |
| Sxp                                | 1.83   | μm                               |
| <b>Spatial Parameters</b>          |        |                                  |
| Sal                                | 11.9   | μm                               |
| Str                                | 0.380  |                                  |
| Std                                | 141    | °                                |
| <b>Hybrid Parameters</b>           |        |                                  |
| Sdq                                | 1.82   |                                  |
| Sdr                                | 84.1   | %                                |
| <b>Functional Parameters (V...</b> |        |                                  |
| Vm                                 | 0.053  | μm <sup>3</sup> /μm <sup>2</sup> |
| Vv                                 | 1.27   | μm <sup>3</sup> /μm <sup>2</sup> |
| Vmp                                | 0.053  | μm <sup>3</sup> /μm <sup>2</sup> |
| Vmc                                | 0.821  | μm <sup>3</sup> /μm <sup>2</sup> |
| Vvc                                | 1.16   | μm <sup>3</sup> /μm <sup>2</sup> |
| Vvv                                | 0.108  | μm <sup>3</sup> /μm <sup>2</sup> |
| <b>Functional Parameters (S...</b> |        |                                  |
| Sk                                 | 1.79   | μm                               |
| Spk                                | 0.868  | μm                               |
| Svk                                | 0.909  | μm                               |
| Smr1                               | 11.0   | %                                |
| Smr2                               | 88.7   | %                                |
| Spq                                | *****  |                                  |
| Svq                                | *****  |                                  |
| Smq                                | *****  |                                  |

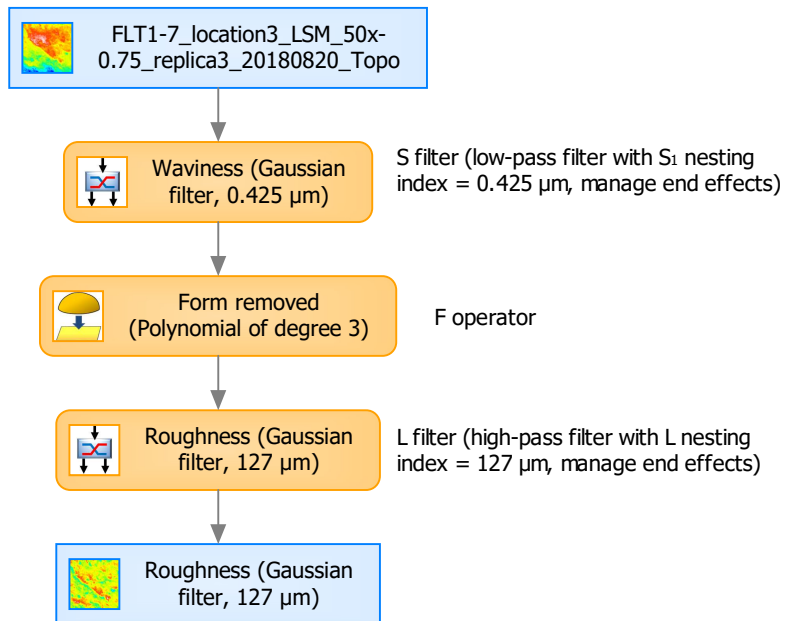

**Flint FLT1-7**  
**50x objective, NA = 0.75 or 0.95**

| Identity card - FLT1-7_location3_LSM_50x-... |                                                |               |  |
|----------------------------------------------|------------------------------------------------|---------------|--|
| Name:                                        | FLT1-7_location3_LSM_50x-0.95_replica1_2018... |               |  |
| Created on:                                  | 8/20/2018 11:23:03 AM                          |               |  |
| <b>Axis: X</b>                               |                                                |               |  |
| Length:                                      | 255                                            | $\mu\text{m}$ |  |
| Size:                                        | 3000                                           | points        |  |
| Spacing:                                     | 85.2                                           | nm            |  |
| <b>Axis: Y</b>                               |                                                |               |  |
| Length:                                      | 255                                            | $\mu\text{m}$ |  |
| Size:                                        | 3000                                           | points        |  |
| Spacing:                                     | 85.2                                           | nm            |  |
| <b>Axis: Z</b>                               |                                                |               |  |
| Length:                                      | 13.0                                           | $\mu\text{m}$ |  |
| Size:                                        | 65532                                          | digits        |  |
| Spacing:                                     | 0.198                                          | nm            |  |
| NMP ratio:                                   | 0.00 % (0 Pts)                                 |               |  |

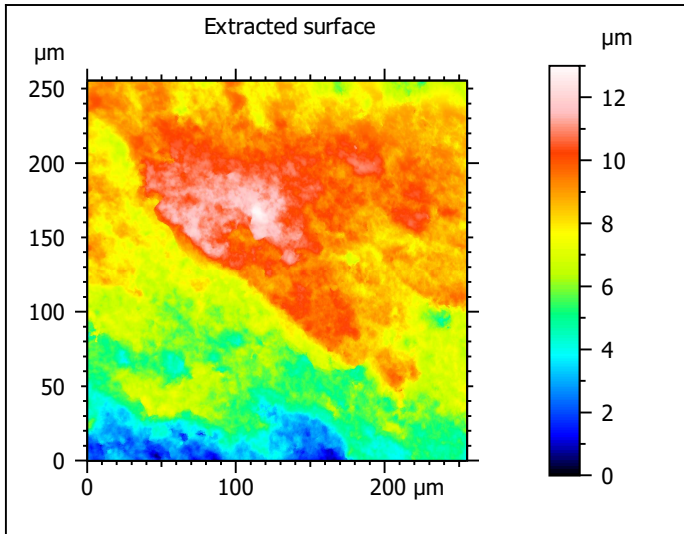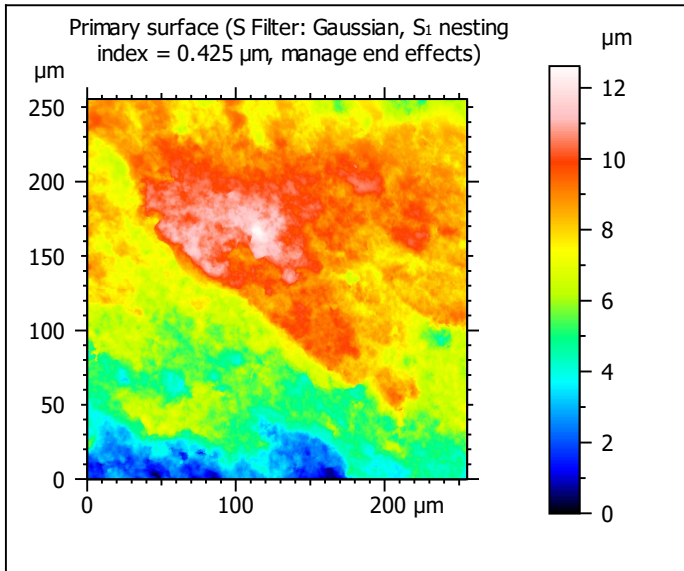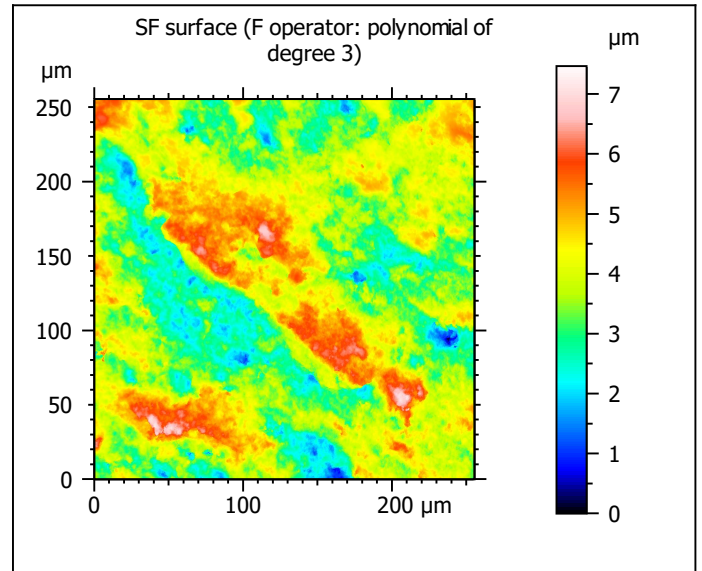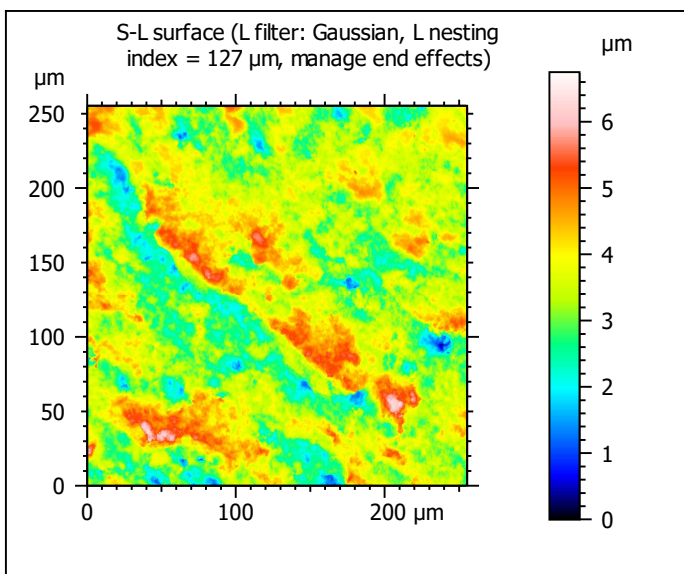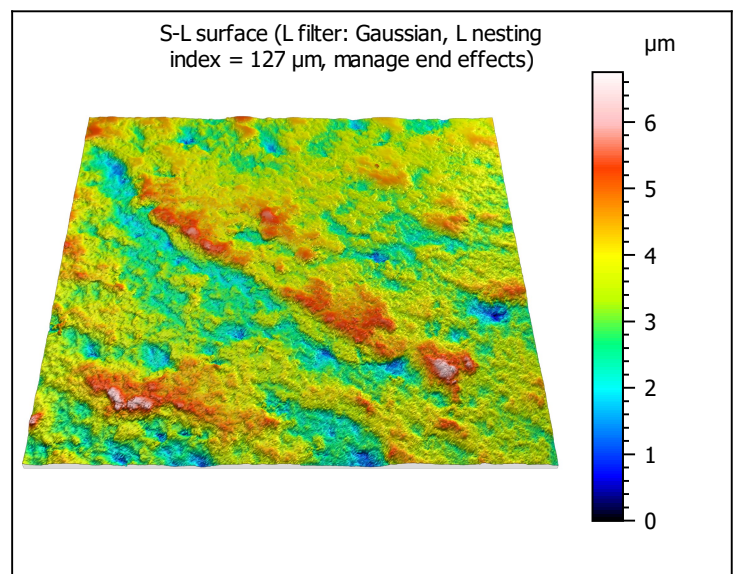



| ISO 25178                          |        |                                  |
|------------------------------------|--------|----------------------------------|
| <b>Height Parameters</b>           |        |                                  |
| Sq                                 | 0.740  | μm                               |
| Ssk                                | 0.175  |                                  |
| Sku                                | 3.38   |                                  |
| Sp                                 | 3.26   | μm                               |
| Sv                                 | 3.50   | μm                               |
| Sz                                 | 6.75   | μm                               |
| Sa                                 | 0.576  | μm                               |
| <b>Functional Parameters</b>       |        |                                  |
| Smr                                | 0.306  | %                                |
| Smc                                | 0.958  | μm                               |
| Sxp                                | 1.38   | μm                               |
| <b>Spatial Parameters</b>          |        |                                  |
| Sal                                | 12.4   | μm                               |
| Str                                | 0.392  |                                  |
| Std                                | 141    | °                                |
| <b>Hybrid Parameters</b>           |        |                                  |
| Sdq                                | 0.611  |                                  |
| Sdr                                | 13.5   | %                                |
| <b>Functional Parameters (V...</b> |        |                                  |
| Vm                                 | 0.0419 | μm <sup>3</sup> /μm <sup>2</sup> |
| Vv                                 | 1.00   | μm <sup>3</sup> /μm <sup>2</sup> |
| Vmp                                | 0.0419 | μm <sup>3</sup> /μm <sup>2</sup> |
| Vmc                                | 0.634  | μm <sup>3</sup> /μm <sup>2</sup> |
| Vvc                                | 0.918  | μm <sup>3</sup> /μm <sup>2</sup> |
| Vvv                                | 0.0819 | μm <sup>3</sup> /μm <sup>2</sup> |
| <b>Functional Parameters (S...</b> |        |                                  |
| Sk                                 | 1.33   | μm                               |
| Spk                                | 0.690  | μm                               |
| Svk                                | 0.679  | μm                               |
| Smr1                               | 11.8   | %                                |
| Smr2                               | 88.9   | %                                |
| Spq                                | *****  |                                  |
| Svq                                | *****  |                                  |
| Smq                                | *****  |                                  |

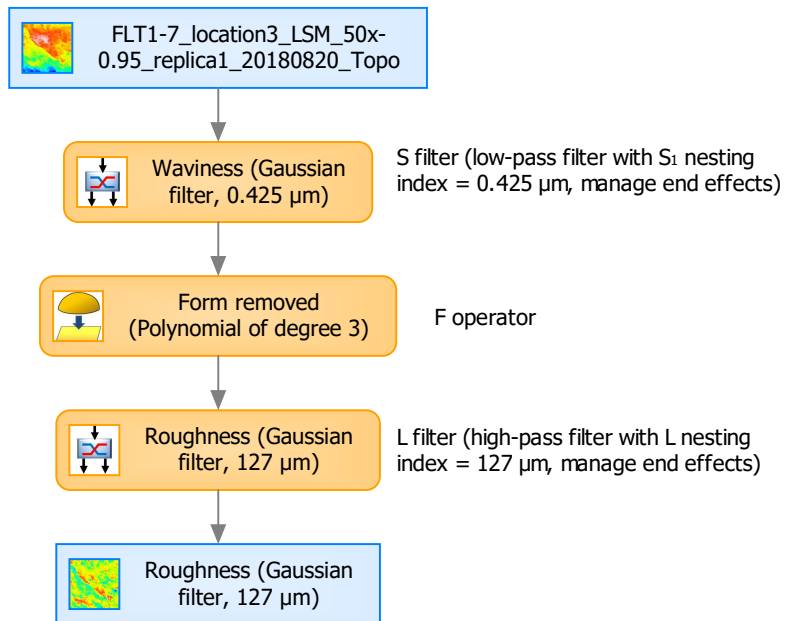

**Flint FLT1-7**  
**50x objective, NA = 0.75 or 0.95**

| Identity card - FLT1-7_location3_LSM_50x-... |                                                |               |  |
|----------------------------------------------|------------------------------------------------|---------------|--|
| Name:                                        | FLT1-7_location3_LSM_50x-0.95_replica2_2018... |               |  |
| Created on:                                  | 8/20/2018 11:40:53 AM                          |               |  |
| <b>Axis: X</b>                               |                                                |               |  |
| Length:                                      | 255                                            | $\mu\text{m}$ |  |
| Size:                                        | 3000                                           | points        |  |
| Spacing:                                     | 85.2                                           | nm            |  |
| <b>Axis: Y</b>                               |                                                |               |  |
| Length:                                      | 255                                            | $\mu\text{m}$ |  |
| Size:                                        | 3000                                           | points        |  |
| Spacing:                                     | 85.2                                           | nm            |  |
| <b>Axis: Z</b>                               |                                                |               |  |
| Length:                                      | 14.8                                           | $\mu\text{m}$ |  |
| Size:                                        | 65532                                          | digits        |  |
| Spacing:                                     | 0.227                                          | nm            |  |
| NMP ratio:                                   | 0.00 % (0 Pts)                                 |               |  |

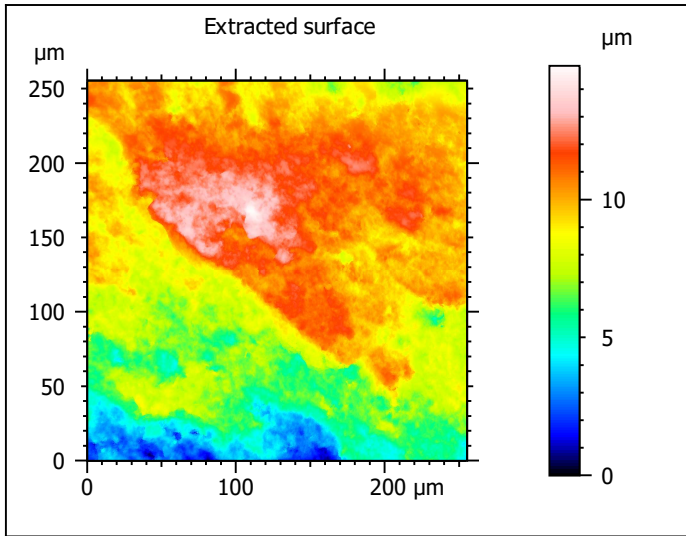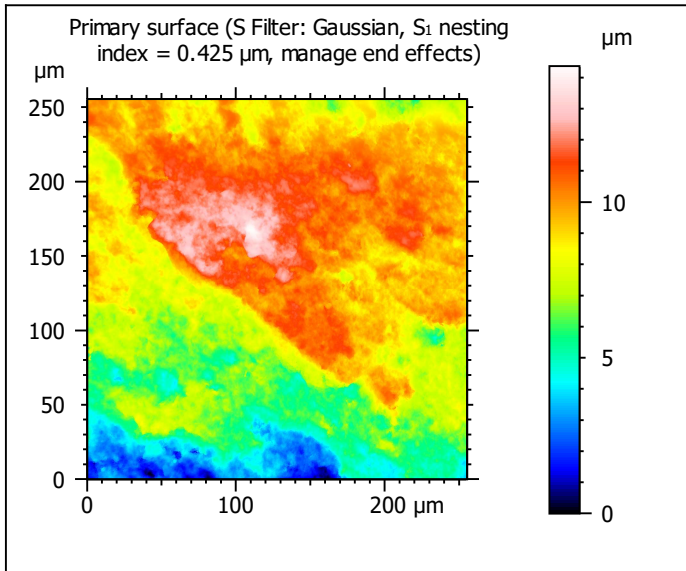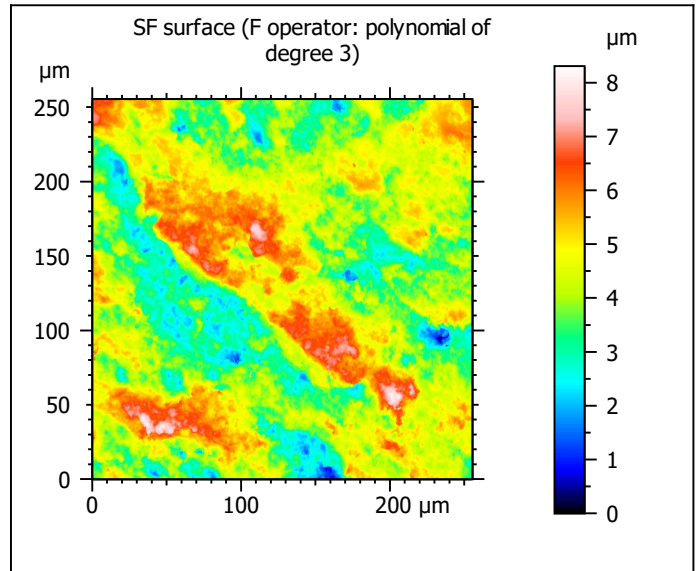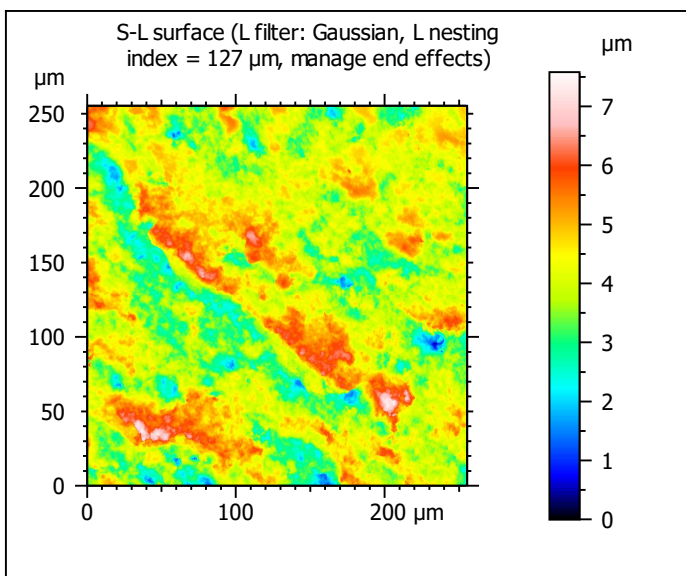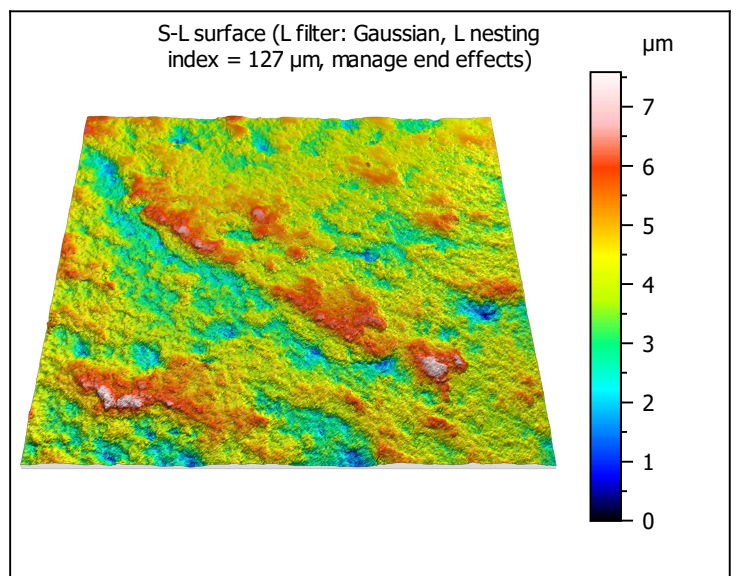

| ISO 25178                          |        |                                  |
|------------------------------------|--------|----------------------------------|
| <b>Height Parameters</b>           |        |                                  |
| Sq                                 | 0.844  | μm                               |
| Ssk                                | 0.170  |                                  |
| Sku                                | 3.40   |                                  |
| Sp                                 | 3.50   | μm                               |
| Sv                                 | 4.09   | μm                               |
| Sz                                 | 7.58   | μm                               |
| Sa                                 | 0.657  | μm                               |
| <b>Functional Parameters</b>       |        |                                  |
| Smr                                | 0.363  | %                                |
| Smc                                | 1.09   | μm                               |
| Sxp                                | 1.58   | μm                               |
| <b>Spatial Parameters</b>          |        |                                  |
| Sal                                | 12.4   | μm                               |
| Str                                | 0.384  |                                  |
| Std                                | 141    | °                                |
| <b>Hybrid Parameters</b>           |        |                                  |
| Sdq                                | 0.705  |                                  |
| Sdr                                | 17.2   | %                                |
| <b>Functional Parameters (V...</b> |        |                                  |
| Vm                                 | 0.0481 | μm <sup>3</sup> /μm <sup>2</sup> |
| Vv                                 | 1.14   | μm <sup>3</sup> /μm <sup>2</sup> |
| Vmp                                | 0.0481 | μm <sup>3</sup> /μm <sup>2</sup> |
| Vmc                                | 0.723  | μm <sup>3</sup> /μm <sup>2</sup> |
| Vvc                                | 1.04   | μm <sup>3</sup> /μm <sup>2</sup> |
| Vvv                                | 0.0939 | μm <sup>3</sup> /μm <sup>2</sup> |
| <b>Functional Parameters (S...</b> |        |                                  |
| Sk                                 | 1.52   | μm                               |
| Spk                                | 0.783  | μm                               |
| Svk                                | 0.773  | μm                               |
| Smr1                               | 11.5   | %                                |
| Smr2                               | 88.9   | %                                |
| Spq                                | *****  |                                  |
| Svq                                | *****  |                                  |
| Smq                                | *****  |                                  |

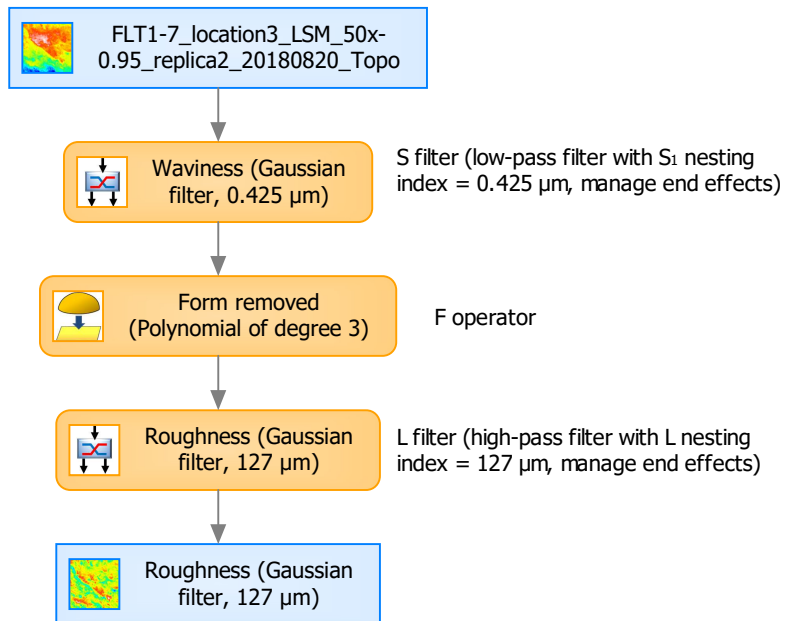

**Flint FLT1-7**  
**50x objective, NA = 0.75 or 0.95**

| Identity card - FLT1-7_location3_LSM_50x-... |                                                |               |  |
|----------------------------------------------|------------------------------------------------|---------------|--|
| Name:                                        | FLT1-7_location3_LSM_50x-0.95_replica3_2018... |               |  |
| Created on:                                  | 8/20/2018 11:58:10 AM                          |               |  |
| <b>Axis: X</b>                               |                                                |               |  |
| Length:                                      | 255                                            | $\mu\text{m}$ |  |
| Size:                                        | 3000                                           | points        |  |
| Spacing:                                     | 85.2                                           | nm            |  |
| <b>Axis: Y</b>                               |                                                |               |  |
| Length:                                      | 255                                            | $\mu\text{m}$ |  |
| Size:                                        | 3000                                           | points        |  |
| Spacing:                                     | 85.2                                           | nm            |  |
| <b>Axis: Z</b>                               |                                                |               |  |
| Length:                                      | 15.9                                           | $\mu\text{m}$ |  |
| Size:                                        | 65532                                          | digits        |  |
| Spacing:                                     | 0.243                                          | nm            |  |
| NMP ratio:                                   | 0.00 % (0 Pts)                                 |               |  |

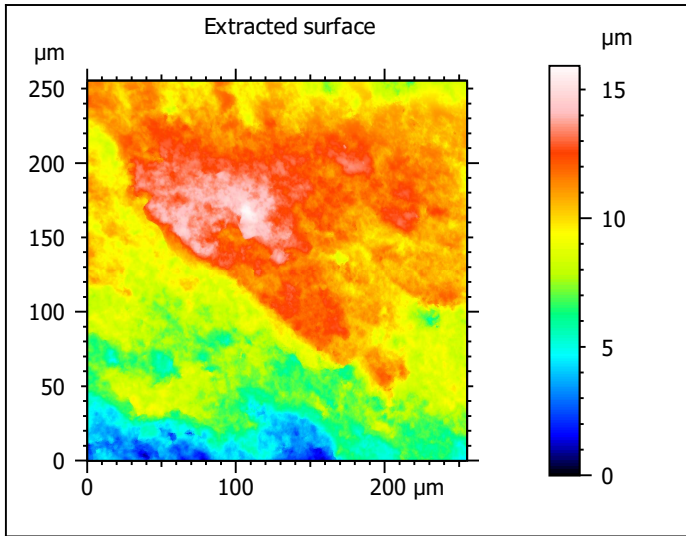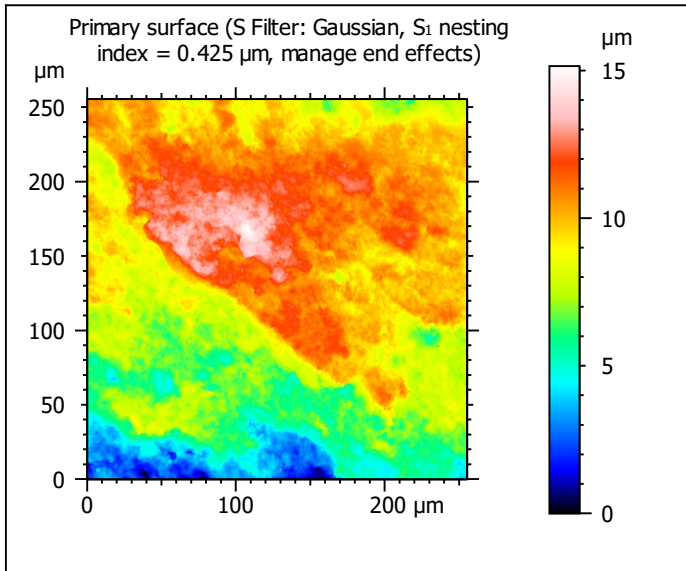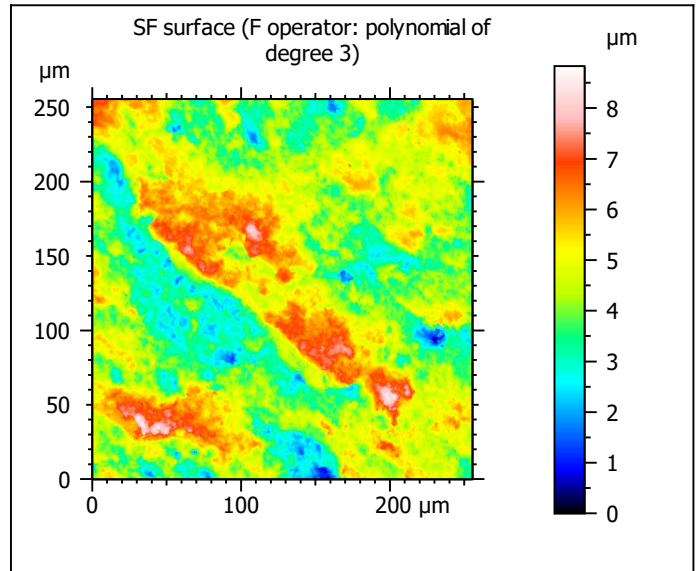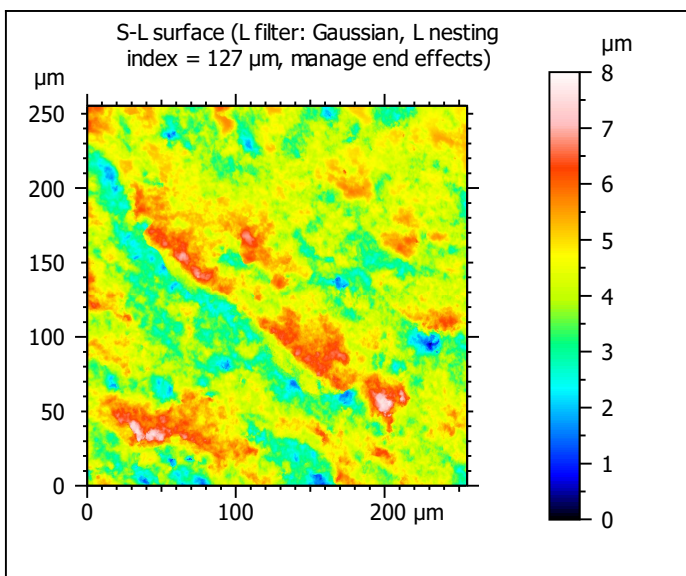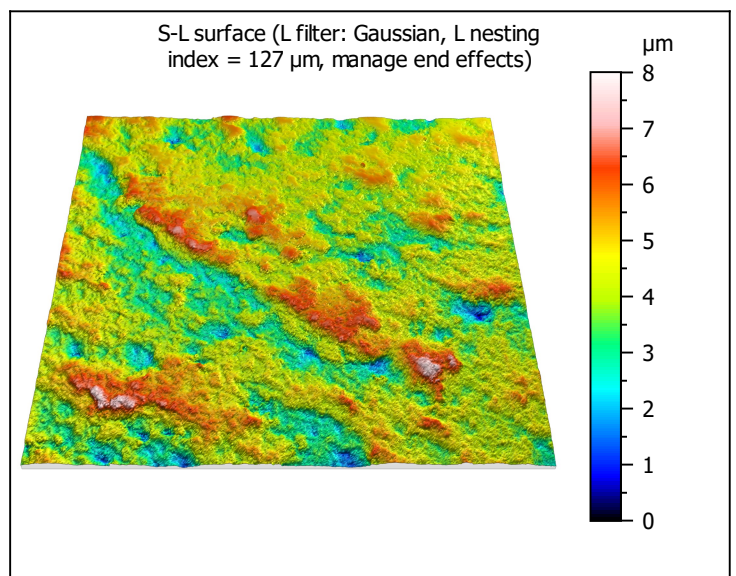

| ISO 25178                    |        |                                  |
|------------------------------|--------|----------------------------------|
| Height Parameters            |        |                                  |
| Sq                           | 0.887  | μm                               |
| Ssk                          | 0.165  |                                  |
| Sku                          | 3.40   |                                  |
| Sp                           | 3.77   | μm                               |
| Sv                           | 4.23   | μm                               |
| Sz                           | 8.00   | μm                               |
| Sa                           | 0.691  | μm                               |
| Functional Parameters        |        |                                  |
| Smr                          | 0.268  | %                                |
| Smc                          | 1.14   | μm                               |
| Sxp                          | 1.66   | μm                               |
| Spatial Parameters           |        |                                  |
| Sal                          | 12.5   | μm                               |
| Str                          | 0.380  |                                  |
| Std                          | 141    | °                                |
| Hybrid Parameters            |        |                                  |
| Sdq                          | 0.735  |                                  |
| Sdr                          | 18.6   | %                                |
| Functional Parameters (V...) |        |                                  |
| Vm                           | 0.0507 | μm <sup>3</sup> /μm <sup>2</sup> |
| Vv                           | 1.19   | μm <sup>3</sup> /μm <sup>2</sup> |
| Vmp                          | 0.0507 | μm <sup>3</sup> /μm <sup>2</sup> |
| Vmc                          | 0.760  | μm <sup>3</sup> /μm <sup>2</sup> |
| Vvc                          | 1.09   | μm <sup>3</sup> /μm <sup>2</sup> |
| Vvv                          | 0.0992 | μm <sup>3</sup> /μm <sup>2</sup> |
| Functional Parameters (S...) |        |                                  |
| Sk                           | 1.60   | μm                               |
| Spk                          | 0.825  | μm                               |
| Svk                          | 0.809  | μm                               |
| Smr1                         | 11.5   | %                                |
| Smr2                         | 88.8   | %                                |
| Spq                          | *****  |                                  |
| Svq                          | *****  |                                  |
| Smq                          | *****  |                                  |

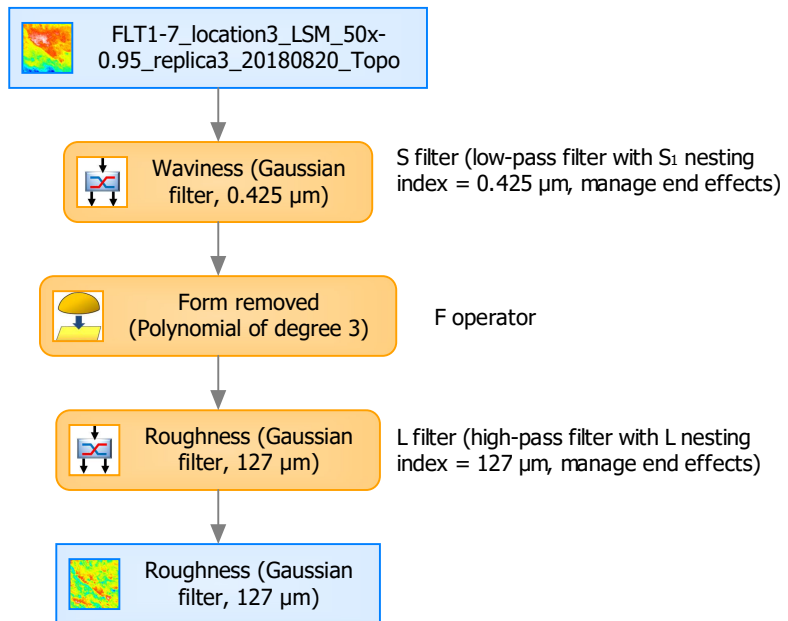

**Quartzite QTFU2-10**  
**50x objective, NA = 0.75 or 0.95**

| Identity card - QTFU2-10_location1_LSM_5... |                                                |               |  |
|---------------------------------------------|------------------------------------------------|---------------|--|
| Name:                                       | QTFU2-10_location1_LSM_50x-0.75_replica1_20... |               |  |
| Created on:                                 | 8/16/2018 10:53:03 AM                          |               |  |
| <b>Axis: X</b>                              |                                                |               |  |
| Length:                                     | 255                                            | $\mu\text{m}$ |  |
| Size:                                       | 3000                                           | points        |  |
| Spacing:                                    | 85.2                                           | nm            |  |
| <b>Axis: Y</b>                              |                                                |               |  |
| Length:                                     | 255                                            | $\mu\text{m}$ |  |
| Size:                                       | 3000                                           | points        |  |
| Spacing:                                    | 85.2                                           | nm            |  |
| <b>Axis: Z</b>                              |                                                |               |  |
| Length:                                     | 61.6                                           | $\mu\text{m}$ |  |
| Size:                                       | 65532                                          | digits        |  |
| Spacing:                                    | 0.940                                          | nm            |  |
| NMP ratio:                                  | 0.00 % (0 Pts)                                 |               |  |

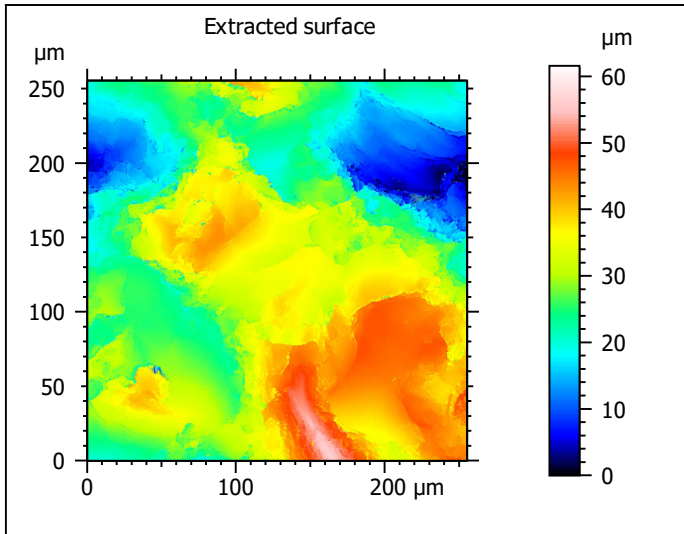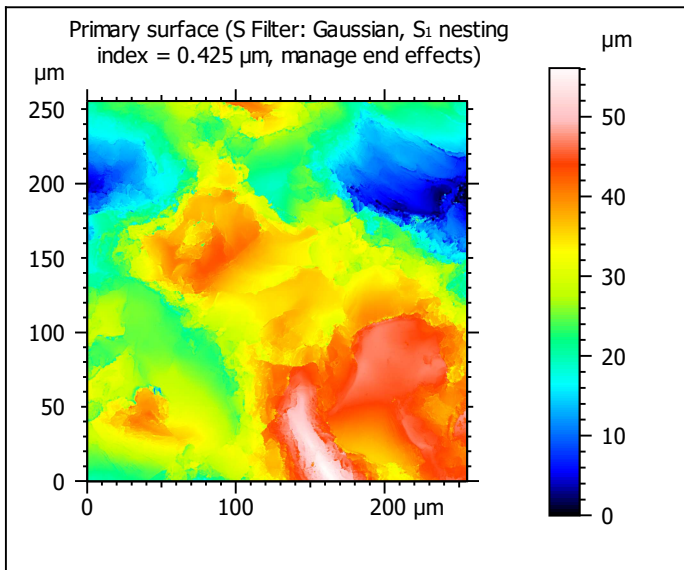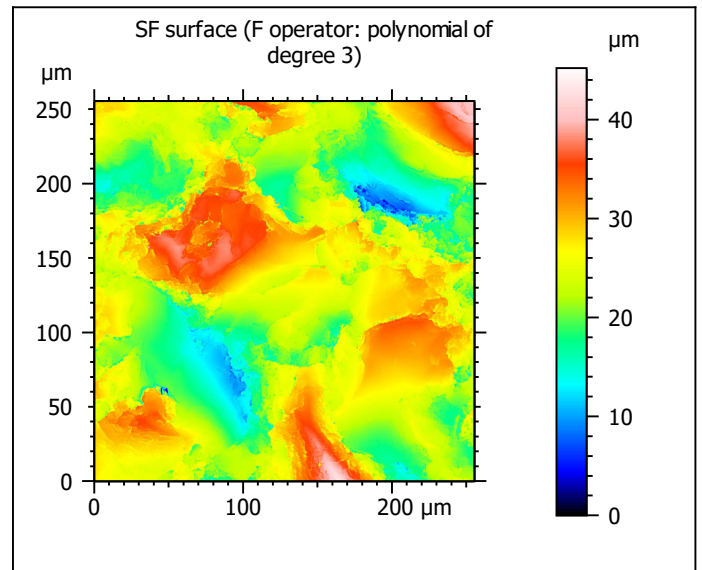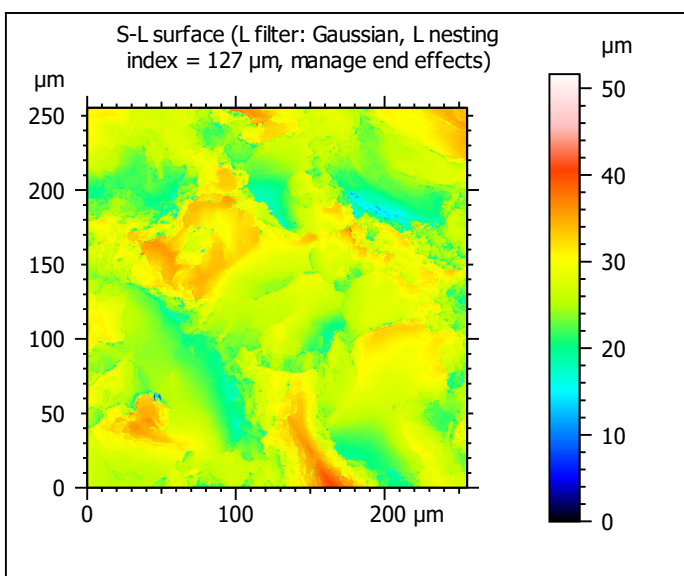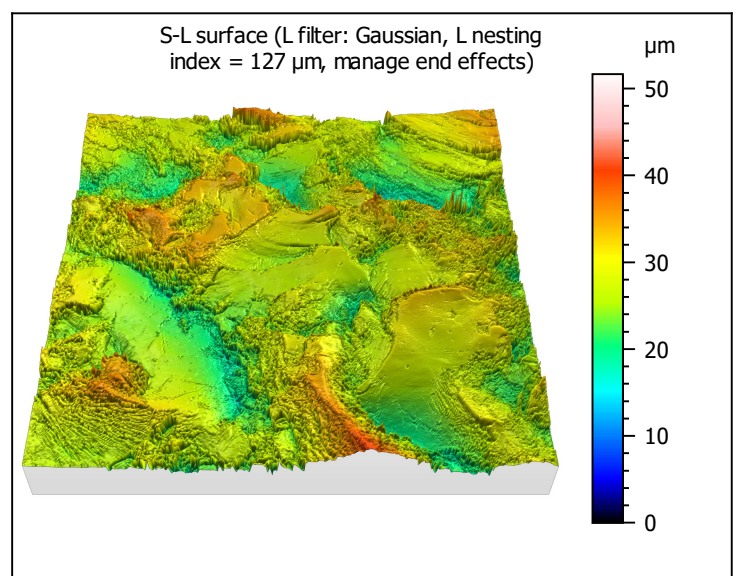

| ISO 25178                             |                                     |
|---------------------------------------|-------------------------------------|
| <b>Height Parameters</b>              |                                     |
| Sq                                    | 3.79 $\mu\text{m}$                  |
| Ssk                                   | -0.0178                             |
| Sku                                   | 3.12                                |
| Sp                                    | 24.9 $\mu\text{m}$                  |
| Sv                                    | 26.8 $\mu\text{m}$                  |
| Sz                                    | 51.7 $\mu\text{m}$                  |
| Sa                                    | 3.00 $\mu\text{m}$                  |
| <b>Functional Parameters</b>          |                                     |
| Smr                                   | 1.11e-05 %                          |
| Smc                                   | 4.97 $\mu\text{m}$                  |
| Sxp                                   | 7.29 $\mu\text{m}$                  |
| <b>Spatial Parameters</b>             |                                     |
| Sal                                   | 20.0 $\mu\text{m}$                  |
| Str                                   | 0.630                               |
| Std                                   | 19.0 $^\circ$                       |
| <b>Hybrid Parameters</b>              |                                     |
| Sdq                                   | 4.82                                |
| Sdr                                   | 148 %                               |
| <b>Functional Parameters (Vol...)</b> |                                     |
| Vm                                    | 0.174 $\mu\text{m}^3/\mu\text{m}^2$ |
| Vv                                    | 5.14 $\mu\text{m}^3/\mu\text{m}^2$  |
| Vmp                                   | 0.174 $\mu\text{m}^3/\mu\text{m}^2$ |
| Vmc                                   | 3.35 $\mu\text{m}^3/\mu\text{m}^2$  |
| Vvc                                   | 4.71 $\mu\text{m}^3/\mu\text{m}^2$  |
| Vvv                                   | 0.440 $\mu\text{m}^3/\mu\text{m}^2$ |
| <b>Functional Parameters (Str...)</b> |                                     |
| Sk                                    | 5.45 $\mu\text{m}$                  |
| Spk                                   | 2.78 $\mu\text{m}$                  |
| Svk                                   | 3.47 $\mu\text{m}$                  |
| Smr1                                  | 12.0 %                              |
| Smr2                                  | 87.1 %                              |
| Spq                                   | *****                               |
| Svq                                   | *****                               |
| Smq                                   | *****                               |

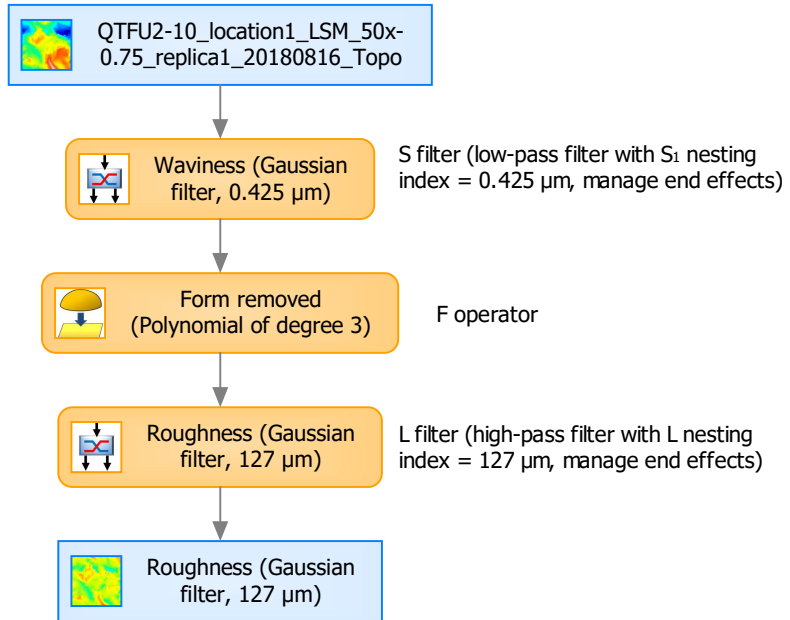

**Quartzite QTFU2-10**  
**50x objective, NA = 0.75 or 0.95**

| Identity card - QTFU2-10_location1_LSM_5... |                                                |        |  |
|---------------------------------------------|------------------------------------------------|--------|--|
| Name:                                       | QTFU2-10_location1_LSM_50x-0.75_replica2_20... |        |  |
| Created on:                                 | 8/16/2018 11:34:47 AM                          |        |  |
| <b>Axis: X</b>                              |                                                |        |  |
| Length:                                     | 255                                            | μm     |  |
| Size:                                       | 3000                                           | points |  |
| Spacing:                                    | 85.2                                           | nm     |  |
| <b>Axis: Y</b>                              |                                                |        |  |
| Length:                                     | 255                                            | μm     |  |
| Size:                                       | 3000                                           | points |  |
| Spacing:                                    | 85.2                                           | nm     |  |
| <b>Axis: Z</b>                              |                                                |        |  |
| Length:                                     | 61.3                                           | μm     |  |
| Size:                                       | 65532                                          | digits |  |
| Spacing:                                    | 0.935                                          | nm     |  |
| NMP ratio:                                  | 0.00 % (0 Pts)                                 |        |  |

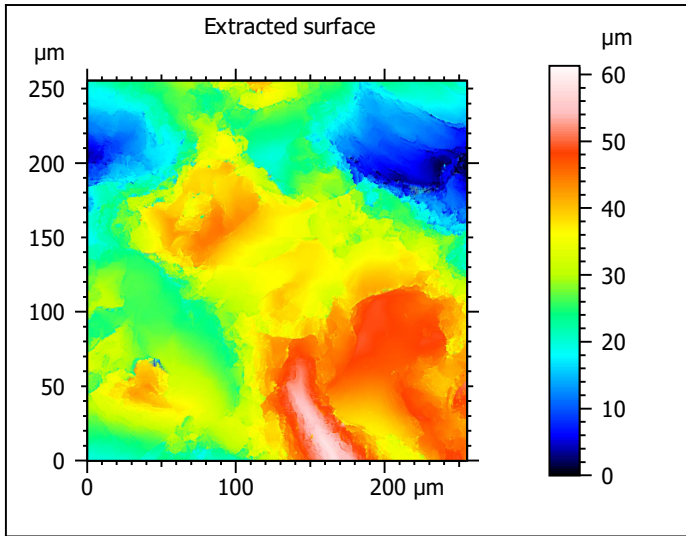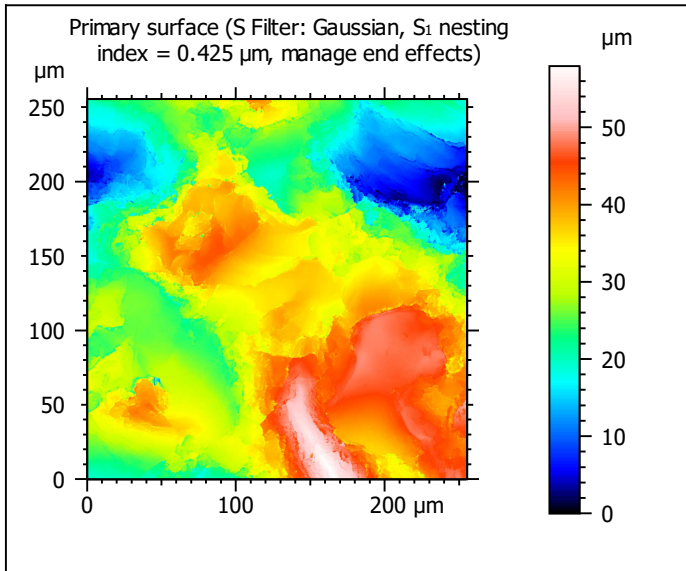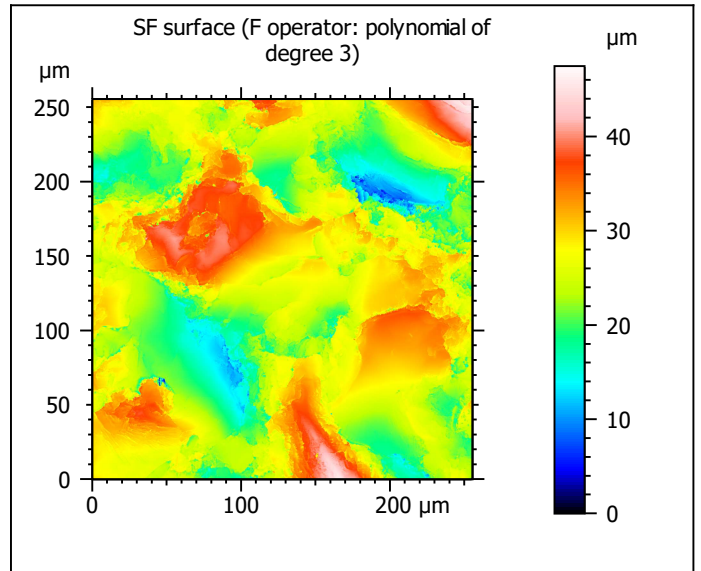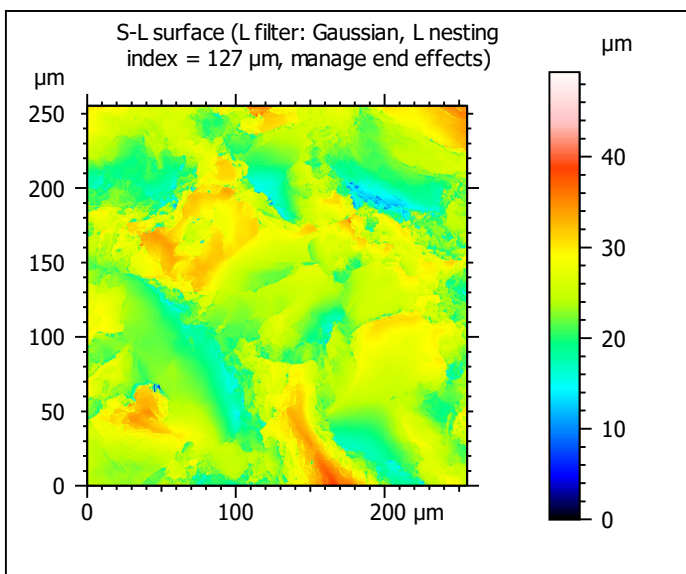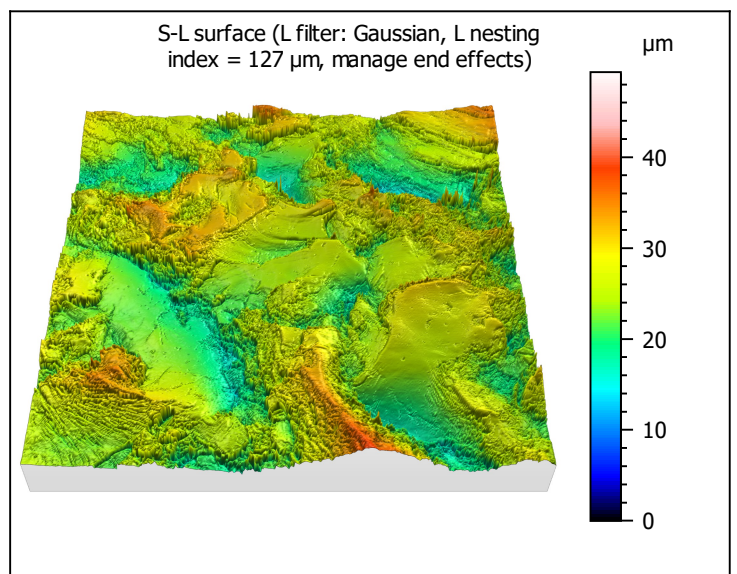



| ISO 25178                             |                                     |
|---------------------------------------|-------------------------------------|
| <b>Height Parameters</b>              |                                     |
| Sq                                    | 3.99 $\mu\text{m}$                  |
| Ssk                                   | -0.000955                           |
| Sku                                   | 3.11                                |
| Sp                                    | 24.8 $\mu\text{m}$                  |
| Sv                                    | 24.6 $\mu\text{m}$                  |
| Sz                                    | 49.4 $\mu\text{m}$                  |
| Sa                                    | 3.16 $\mu\text{m}$                  |
| <b>Functional Parameters</b>          |                                     |
| Smr                                   | 3.33e-05 %                          |
| Smc                                   | 5.22 $\mu\text{m}$                  |
| Sxp                                   | 7.64 $\mu\text{m}$                  |
| <b>Spatial Parameters</b>             |                                     |
| Sal                                   | 19.8 $\mu\text{m}$                  |
| Str                                   | 0.630                               |
| Std                                   | 19.3 $^\circ$                       |
| <b>Hybrid Parameters</b>              |                                     |
| Sdq                                   | 4.92                                |
| Sdr                                   | 155 %                               |
| <b>Functional Parameters (Vol...)</b> |                                     |
| Vm                                    | 0.185 $\mu\text{m}^3/\mu\text{m}^2$ |
| Vv                                    | 5.41 $\mu\text{m}^3/\mu\text{m}^2$  |
| Vmp                                   | 0.185 $\mu\text{m}^3/\mu\text{m}^2$ |
| Vmc                                   | 3.50 $\mu\text{m}^3/\mu\text{m}^2$  |
| Vvc                                   | 4.94 $\mu\text{m}^3/\mu\text{m}^2$  |
| Vvv                                   | 0.467 $\mu\text{m}^3/\mu\text{m}^2$ |
| <b>Functional Parameters (Str...)</b> |                                     |
| Sk                                    | 5.80 $\mu\text{m}$                  |
| Spk                                   | 2.86 $\mu\text{m}$                  |
| Svk                                   | 3.56 $\mu\text{m}$                  |
| Smr1                                  | 11.6 %                              |
| Smr2                                  | 87.5 %                              |
| Spq                                   | *****                               |
| Svq                                   | *****                               |
| Smq                                   | *****                               |

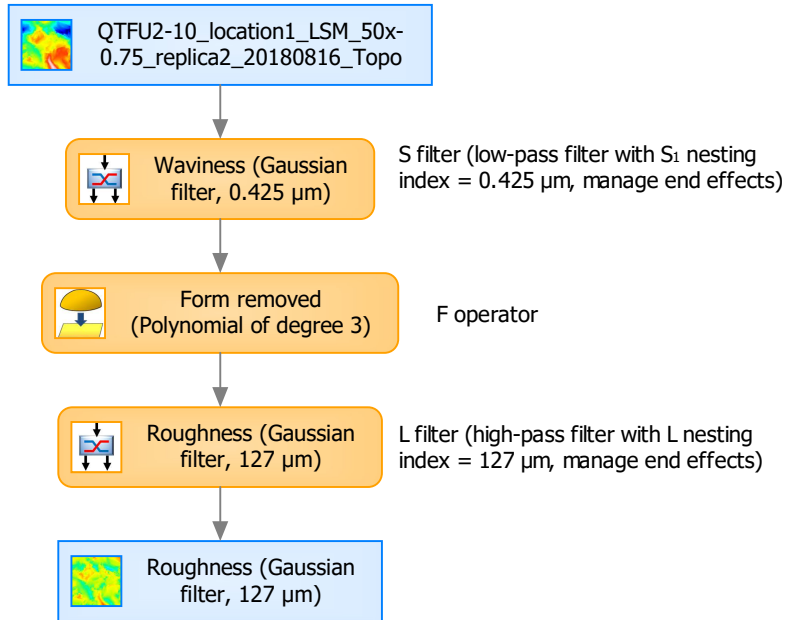

**Quartzite QTFU2-10**  
**50x objective, NA = 0.75 or 0.95**

| Identity card - QTFU2-10_location1_LSM_5... |                                                |        |  |
|---------------------------------------------|------------------------------------------------|--------|--|
| Name:                                       | QTFU2-10_location1_LSM_50x-0.75_replica3_20... |        |  |
| Created on:                                 | 8/16/2018 12:16:49 PM                          |        |  |
| <b>Axis: X</b>                              |                                                |        |  |
| Length:                                     | 255                                            | μm     |  |
| Size:                                       | 3000                                           | points |  |
| Spacing:                                    | 85.2                                           | nm     |  |
| <b>Axis: Y</b>                              |                                                |        |  |
| Length:                                     | 255                                            | μm     |  |
| Size:                                       | 3000                                           | points |  |
| Spacing:                                    | 85.2                                           | nm     |  |
| <b>Axis: Z</b>                              |                                                |        |  |
| Length:                                     | 64.3                                           | μm     |  |
| Size:                                       | 65532                                          | digits |  |
| Spacing:                                    | 0.981                                          | nm     |  |
| NMP ratio:                                  | 0.00 % (0 Pts)                                 |        |  |

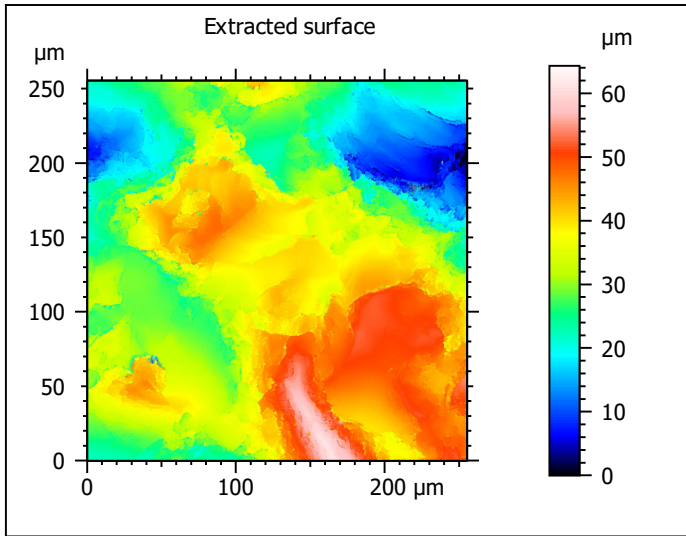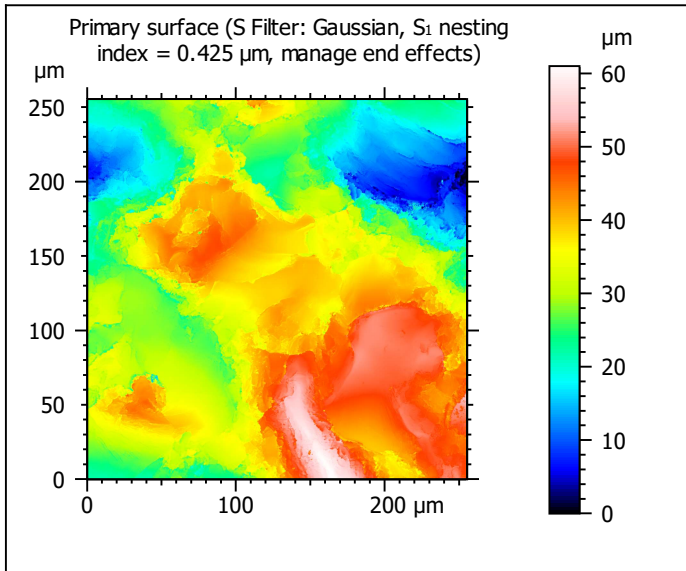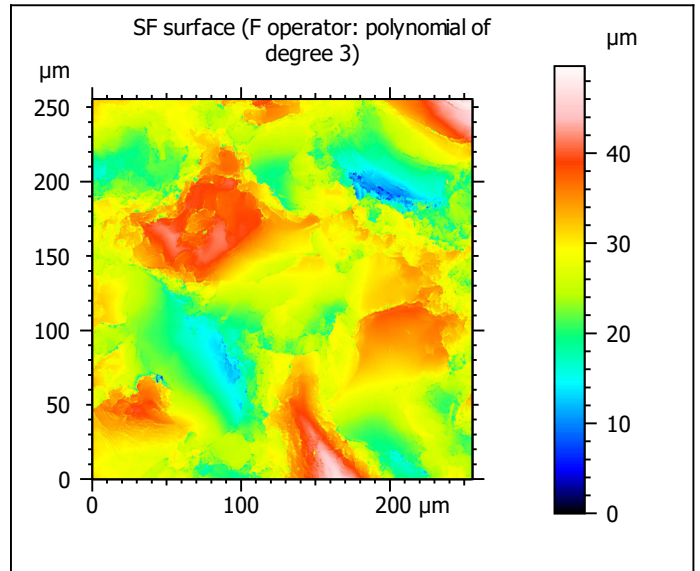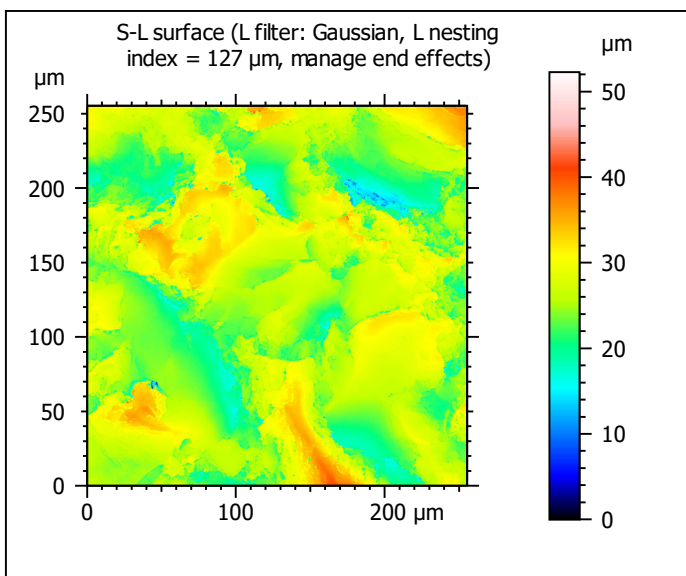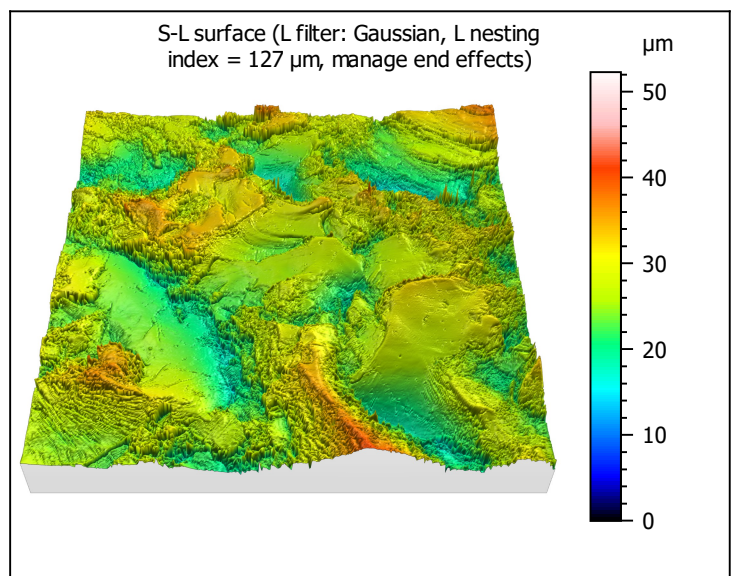

| ISO 25178                             |                                     |
|---------------------------------------|-------------------------------------|
| <b>Height Parameters</b>              |                                     |
| Sq                                    | 4.06 $\mu\text{m}$                  |
| Ssk                                   | -0.00287                            |
| Sku                                   | 3.12                                |
| Sp                                    | 26.3 $\mu\text{m}$                  |
| Sv                                    | 26.0 $\mu\text{m}$                  |
| Sz                                    | 52.3 $\mu\text{m}$                  |
| Sa                                    | 3.21 $\mu\text{m}$                  |
| <b>Functional Parameters</b>          |                                     |
| Smr                                   | 1.11e-05 %                          |
| Smc                                   | 5.34 $\mu\text{m}$                  |
| Sxp                                   | 7.77 $\mu\text{m}$                  |
| <b>Spatial Parameters</b>             |                                     |
| Sal                                   | 19.8 $\mu\text{m}$                  |
| Str                                   | 0.630                               |
| Std                                   | 20.0 $^\circ$                       |
| <b>Hybrid Parameters</b>              |                                     |
| Sdq                                   | 5.02                                |
| Sdr                                   | 159 %                               |
| <b>Functional Parameters (Vol...)</b> |                                     |
| Vm                                    | 0.187 $\mu\text{m}^3/\mu\text{m}^2$ |
| Vv                                    | 5.52 $\mu\text{m}^3/\mu\text{m}^2$  |
| Vmp                                   | 0.187 $\mu\text{m}^3/\mu\text{m}^2$ |
| Vmc                                   | 3.56 $\mu\text{m}^3/\mu\text{m}^2$  |
| Vvc                                   | 5.05 $\mu\text{m}^3/\mu\text{m}^2$  |
| Vvv                                   | 0.478 $\mu\text{m}^3/\mu\text{m}^2$ |
| <b>Functional Parameters (Str...)</b> |                                     |
| Sk                                    | 5.91 $\mu\text{m}$                  |
| Spk                                   | 2.90 $\mu\text{m}$                  |
| Svk                                   | 3.68 $\mu\text{m}$                  |
| Smr1                                  | 11.6 %                              |
| Smr2                                  | 87.7 %                              |
| Spq                                   | *****                               |
| Svq                                   | *****                               |
| Smq                                   | *****                               |

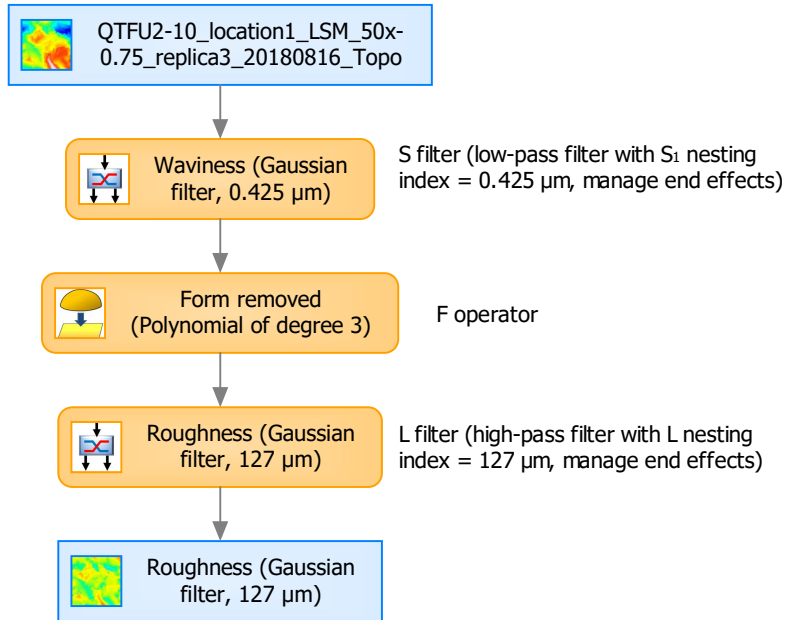

**Quartzite QTFU2-10**  
**50x objective, NA = 0.75 or 0.95**

| Identity card - QTFU2-10_location1_LSM_5... |                                                |               |  |
|---------------------------------------------|------------------------------------------------|---------------|--|
| Name:                                       | QTFU2-10_location1_LSM_50x-0.95_replica1_20... |               |  |
| Created on:                                 | 8/16/2018 10:33:48 AM                          |               |  |
| <b>Axis: X</b>                              |                                                |               |  |
| Length:                                     | 255                                            | $\mu\text{m}$ |  |
| Size:                                       | 3000                                           | points        |  |
| Spacing:                                    | 85.2                                           | nm            |  |
| <b>Axis: Y</b>                              |                                                |               |  |
| Length:                                     | 255                                            | $\mu\text{m}$ |  |
| Size:                                       | 3000                                           | points        |  |
| Spacing:                                    | 85.2                                           | nm            |  |
| <b>Axis: Z</b>                              |                                                |               |  |
| Length:                                     | 59.9                                           | $\mu\text{m}$ |  |
| Size:                                       | 65532                                          | digits        |  |
| Spacing:                                    | 0.914                                          | nm            |  |
| NMP ratio:                                  | 0.00 % (0 Pts)                                 |               |  |

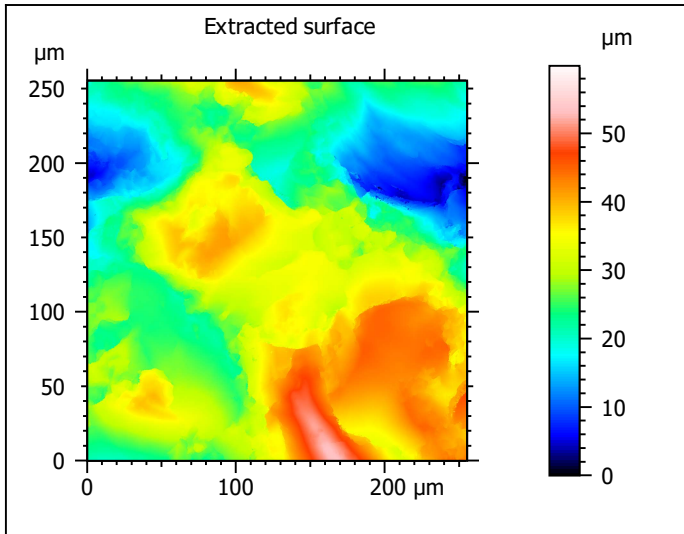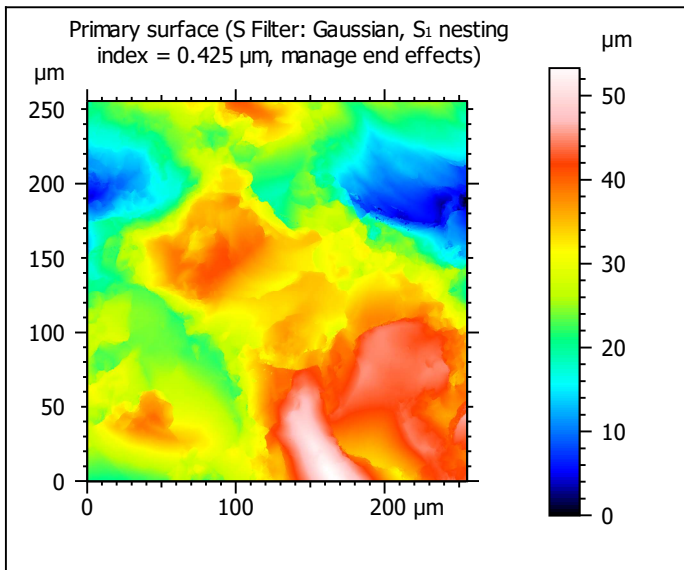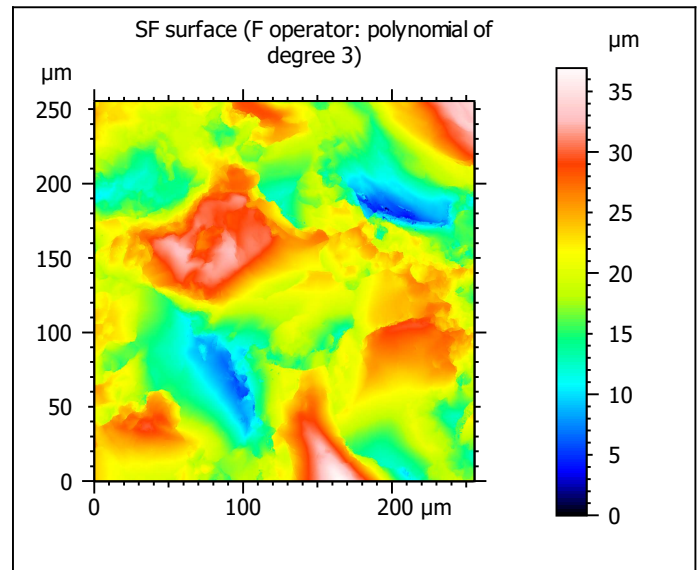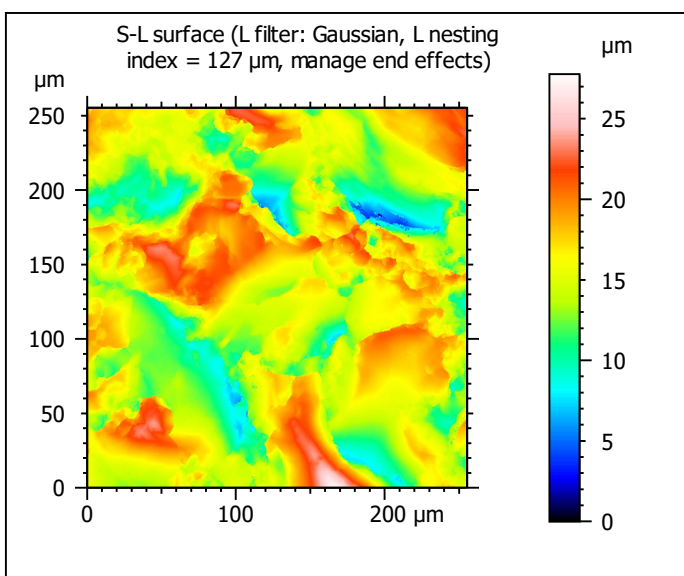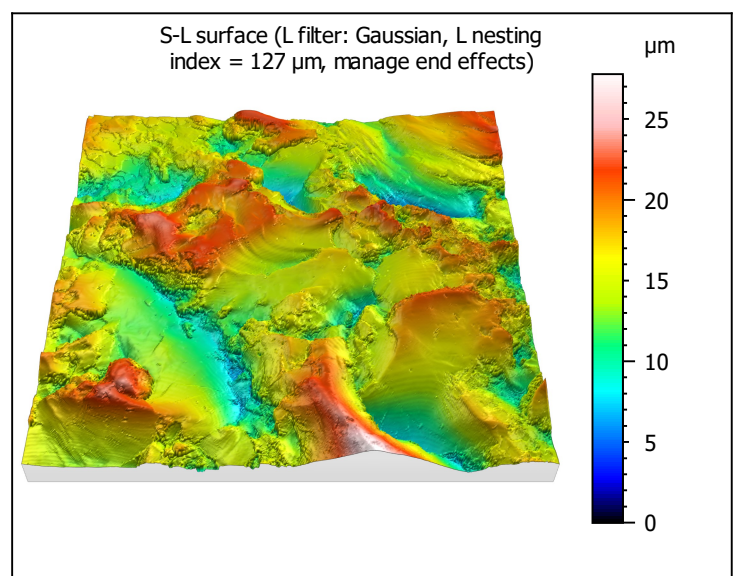

| ISO 25178                           |         |                                  |
|-------------------------------------|---------|----------------------------------|
| <b>Height Parameters</b>            |         |                                  |
| Sq                                  | 3.42    | μm                               |
| Ssk                                 | -0.0409 |                                  |
| Sku                                 | 2.93    |                                  |
| Sp                                  | 12.4    | μm                               |
| Sv                                  | 15.3    | μm                               |
| Sz                                  | 27.8    | μm                               |
| Sa                                  | 2.72    | μm                               |
| <b>Functional Parameters</b>        |         |                                  |
| Smr                                 | 0.0435  | %                                |
| Smc                                 | 4.56    | μm                               |
| Sxp                                 | 6.76    | μm                               |
| <b>Spatial Parameters</b>           |         |                                  |
| Sal                                 | 20.2    | μm                               |
| Str                                 | 0.606   |                                  |
| Std                                 | 129     | °                                |
| <b>Hybrid Parameters</b>            |         |                                  |
| Sdq                                 | 1.93    |                                  |
| Sdr                                 | 40.8    | %                                |
| <b>Functional Parameters (V...)</b> |         |                                  |
| Vm                                  | 0.140   | μm <sup>3</sup> /μm <sup>2</sup> |
| Vv                                  | 4.70    | μm <sup>3</sup> /μm <sup>2</sup> |
| Vmp                                 | 0.140   | μm <sup>3</sup> /μm <sup>2</sup> |
| Vmc                                 | 3.10    | μm <sup>3</sup> /μm <sup>2</sup> |
| Vvc                                 | 4.31    | μm <sup>3</sup> /μm <sup>2</sup> |
| Vvv                                 | 0.394   | μm <sup>3</sup> /μm <sup>2</sup> |
| <b>Functional Parameters (S...)</b> |         |                                  |
| Sk                                  | 4.70    | μm                               |
| Spk                                 | 2.17    | μm                               |
| Svk                                 | 2.77    | μm                               |
| Smr1                                | 11.6    | %                                |
| Smr2                                | 86.5    | %                                |
| Spq                                 | *****   |                                  |
| Svq                                 | *****   |                                  |
| Smq                                 | *****   |                                  |

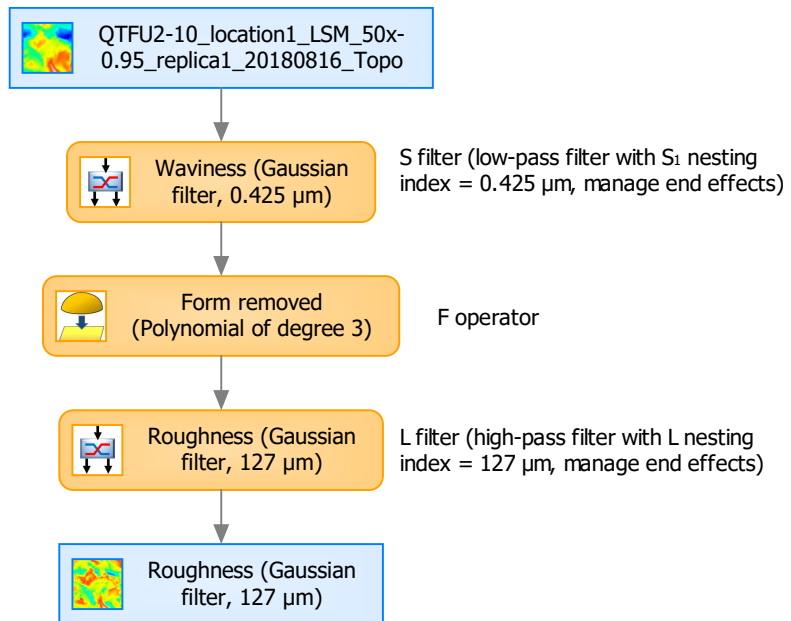

**Quartzite QTFU2-10**  
**50x objective, NA = 0.75 or 0.95**

| Identity card - QTFU2-10_location1_LSM_5... |                                                |        |  |
|---------------------------------------------|------------------------------------------------|--------|--|
| Name:                                       | QTFU2-10_location1_LSM_50x-0.95_replica2_20... |        |  |
| Created on:                                 | 8/16/2018 11:12:49 AM                          |        |  |
| <b>Axis: X</b>                              |                                                |        |  |
| Length:                                     | 255                                            | μm     |  |
| Size:                                       | 3000                                           | points |  |
| Spacing:                                    | 85.2                                           | nm     |  |
| <b>Axis: Y</b>                              |                                                |        |  |
| Length:                                     | 255                                            | μm     |  |
| Size:                                       | 3000                                           | points |  |
| Spacing:                                    | 85.2                                           | nm     |  |
| <b>Axis: Z</b>                              |                                                |        |  |
| Length:                                     | 57.6                                           | μm     |  |
| Size:                                       | 65532                                          | digits |  |
| Spacing:                                    | 0.879                                          | nm     |  |
| NMP ratio:                                  | 0.00 % (0 Pts)                                 |        |  |

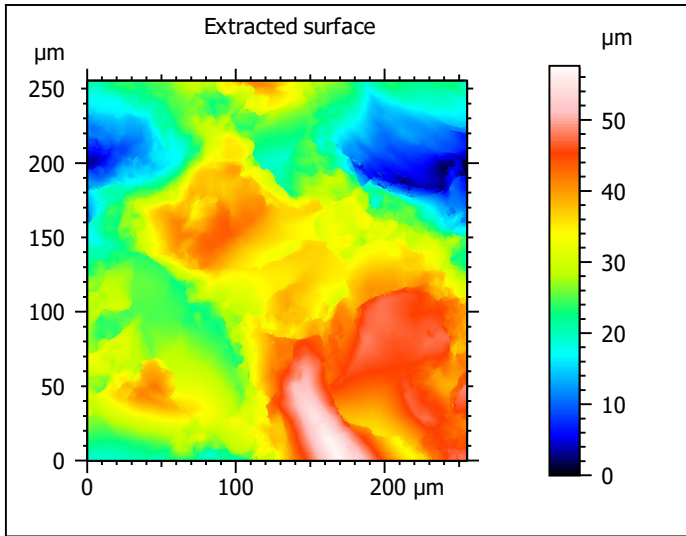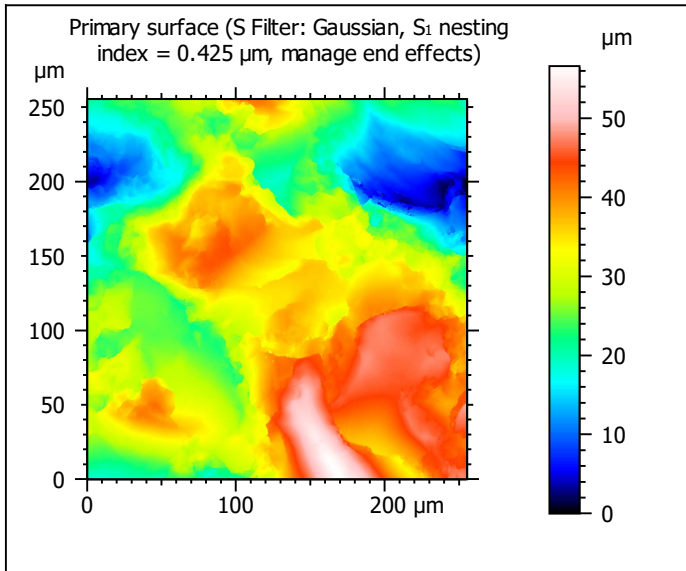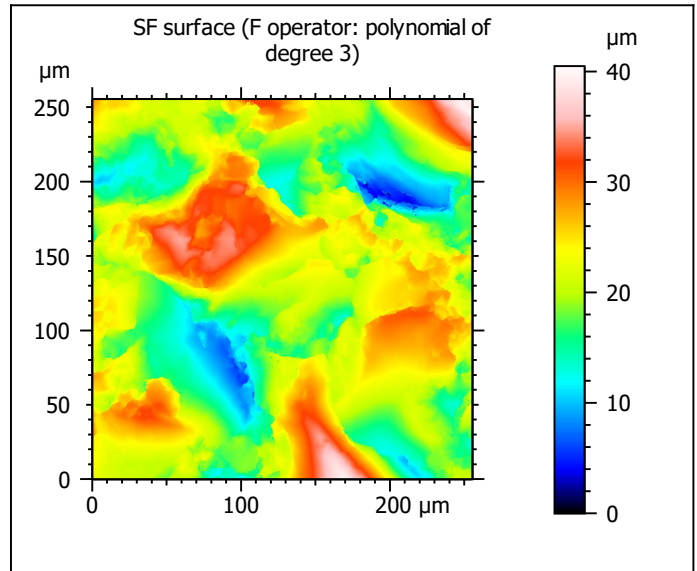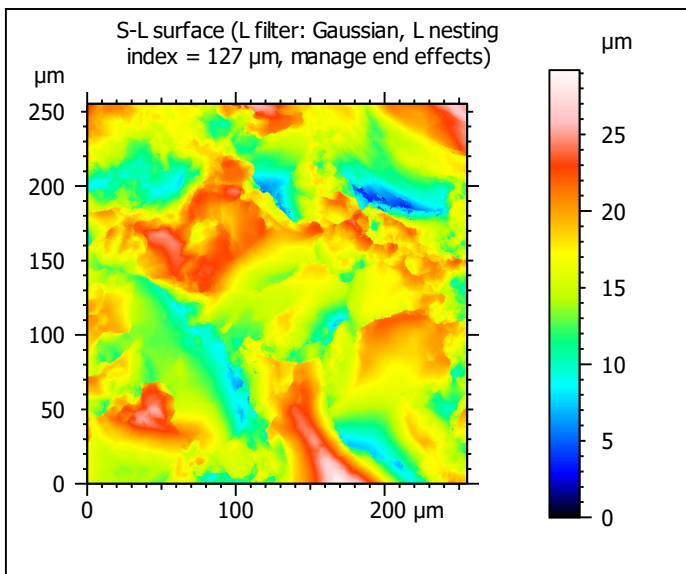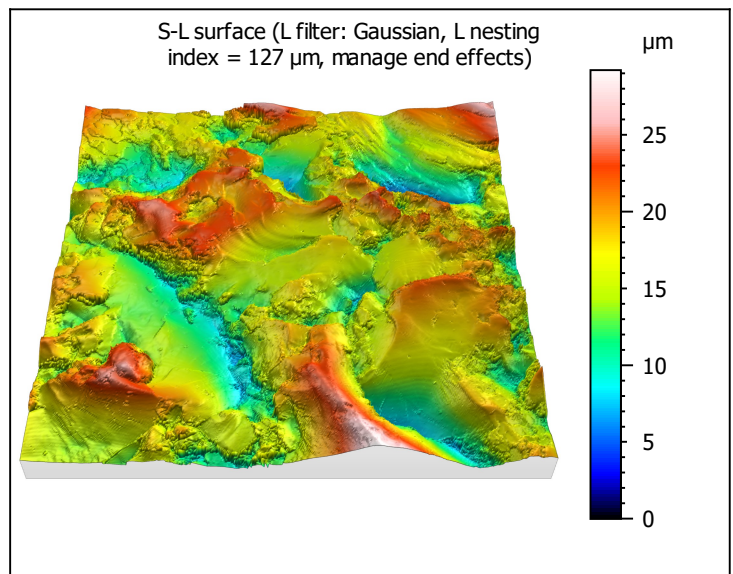

| ISO 25178                           |         |                                  |
|-------------------------------------|---------|----------------------------------|
| <b>Height Parameters</b>            |         |                                  |
| Sq                                  | 3.80    | μm                               |
| Ssk                                 | -0.0243 |                                  |
| Sku                                 | 2.96    |                                  |
| Sp                                  | 13.0    | μm                               |
| Sv                                  | 16.2    | μm                               |
| Sz                                  | 29.2    | μm                               |
| Sa                                  | 3.01    | μm                               |
| <b>Functional Parameters</b>        |         |                                  |
| Smr                                 | 0.0446  | %                                |
| Smc                                 | 4.99    | μm                               |
| Sxp                                 | 7.52    | μm                               |
| <b>Spatial Parameters</b>           |         |                                  |
| Sal                                 | 20.2    | μm                               |
| Str                                 | 0.618   |                                  |
| Std                                 | 129     | °                                |
| <b>Hybrid Parameters</b>            |         |                                  |
| Sdq                                 | 2.09    |                                  |
| Sdr                                 | 46.3    | %                                |
| <b>Functional Parameters (V...)</b> |         |                                  |
| Vm                                  | 0.168   | μm <sup>3</sup> /μm <sup>2</sup> |
| Vv                                  | 5.16    | μm <sup>3</sup> /μm <sup>2</sup> |
| Vmp                                 | 0.168   | μm <sup>3</sup> /μm <sup>2</sup> |
| Vmc                                 | 3.40    | μm <sup>3</sup> /μm <sup>2</sup> |
| Vvc                                 | 4.71    | μm <sup>3</sup> /μm <sup>2</sup> |
| Vvv                                 | 0.445   | μm <sup>3</sup> /μm <sup>2</sup> |
| <b>Functional Parameters (S...)</b> |         |                                  |
| Sk                                  | 5.34    | μm                               |
| Spk                                 | 2.24    | μm                               |
| Svk                                 | 2.97    | μm                               |
| Smr1                                | 11.0    | %                                |
| Smr2                                | 87.0    | %                                |
| Spq                                 | *****   |                                  |
| Svq                                 | *****   |                                  |
| Smq                                 | *****   |                                  |

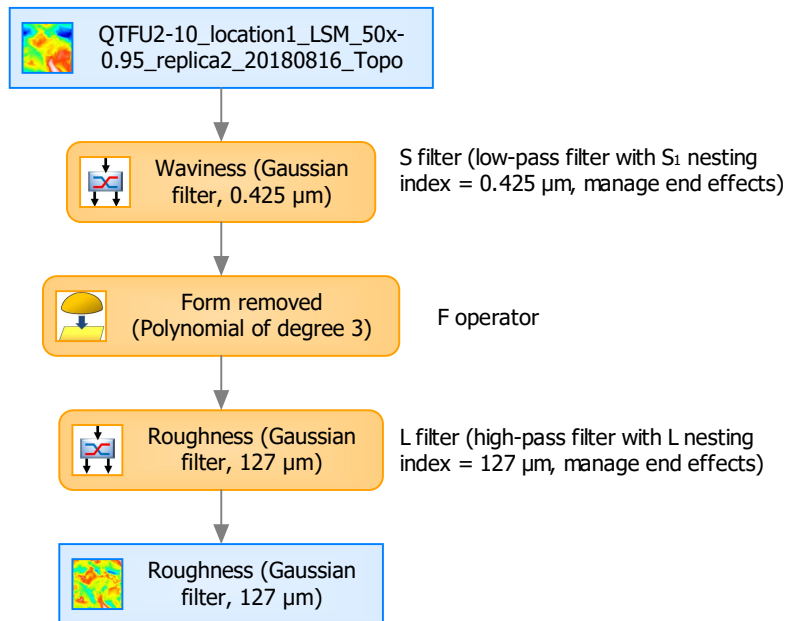

**Quartzite QTFU2-10**  
**50x objective, NA = 0.75 or 0.95**

| Identity card - QTFU2-10_location1_LSM_5... |                                                |               |  |
|---------------------------------------------|------------------------------------------------|---------------|--|
| Name:                                       | QTFU2-10_location1_LSM_50x-0.95_replica3_20... |               |  |
| Created on:                                 | 8/16/2018 11:55:19 AM                          |               |  |
| <b>Axis: X</b>                              |                                                |               |  |
| Length:                                     | 255                                            | $\mu\text{m}$ |  |
| Size:                                       | 3000                                           | points        |  |
| Spacing:                                    | 85.2                                           | nm            |  |
| <b>Axis: Y</b>                              |                                                |               |  |
| Length:                                     | 255                                            | $\mu\text{m}$ |  |
| Size:                                       | 3000                                           | points        |  |
| Spacing:                                    | 85.2                                           | nm            |  |
| <b>Axis: Z</b>                              |                                                |               |  |
| Length:                                     | 58.6                                           | $\mu\text{m}$ |  |
| Size:                                       | 65532                                          | digits        |  |
| Spacing:                                    | 0.895                                          | nm            |  |
| NMP ratio:                                  | 0.00 % (0 Pts)                                 |               |  |

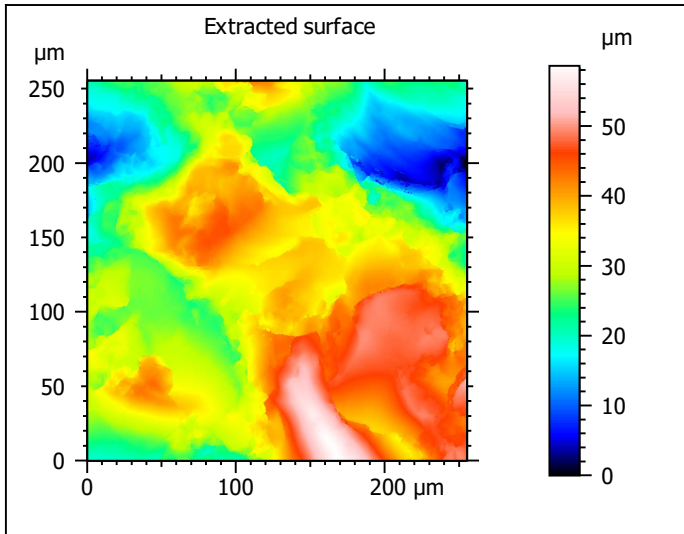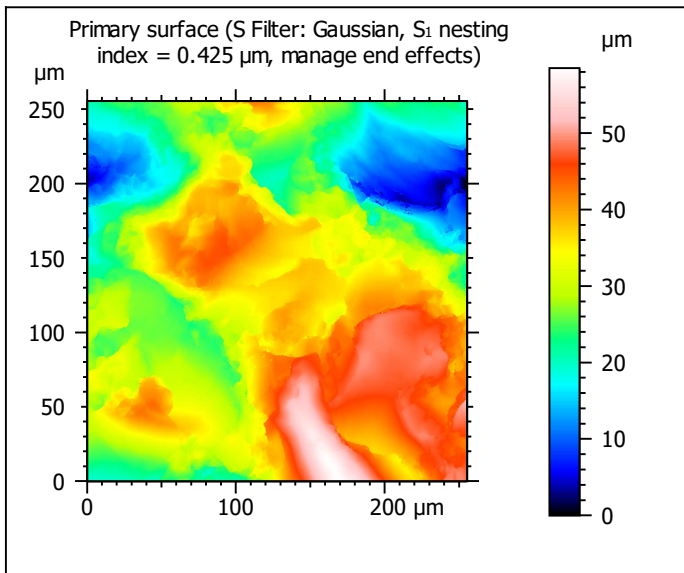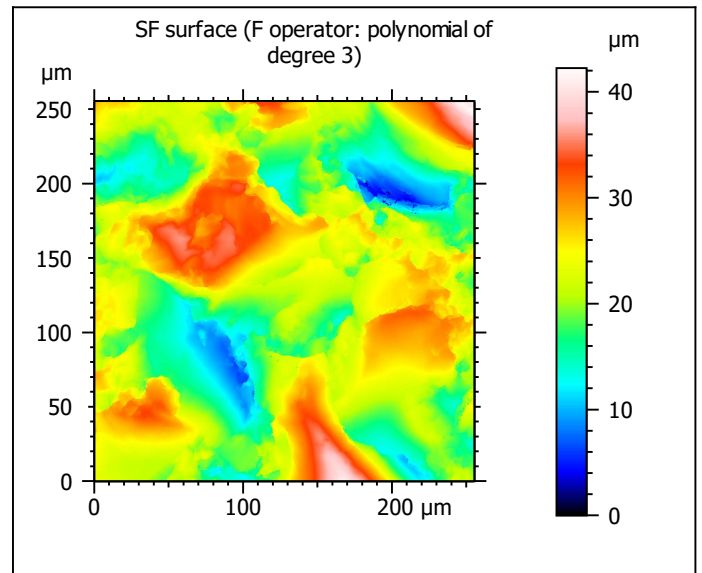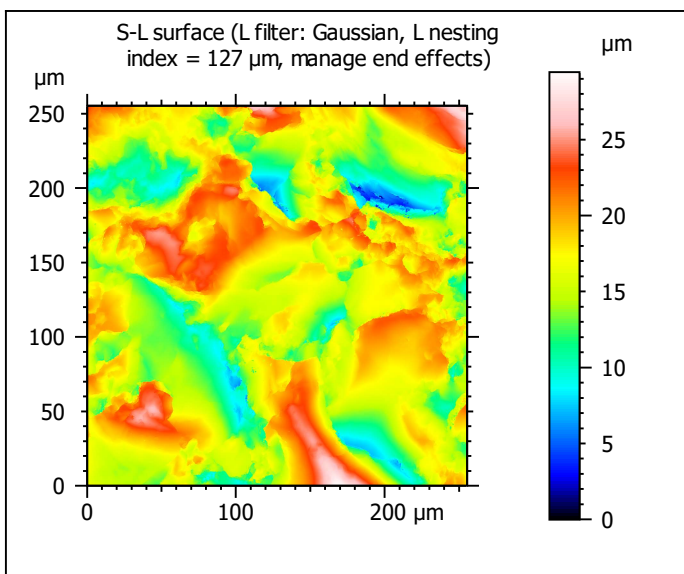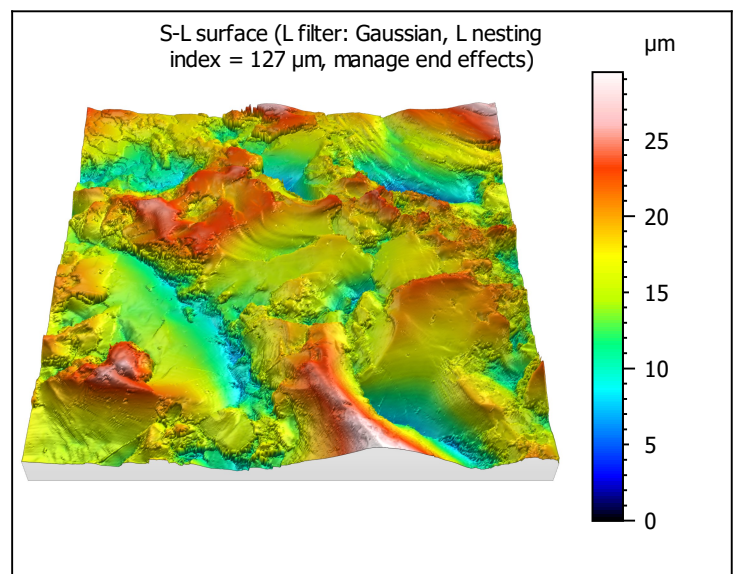



| ISO 25178                           |         |                                  |
|-------------------------------------|---------|----------------------------------|
| <b>Height Parameters</b>            |         |                                  |
| Sq                                  | 3.90    | μm                               |
| Ssk                                 | -0.0236 |                                  |
| Sku                                 | 2.97    |                                  |
| Sp                                  | 13.0    | μm                               |
| Sv                                  | 16.5    | μm                               |
| Sz                                  | 29.5    | μm                               |
| Sa                                  | 3.09    | μm                               |
| <b>Functional Parameters</b>        |         |                                  |
| Smr                                 | 0.0595  | %                                |
| Smc                                 | 5.13    | μm                               |
| Sxp                                 | 7.69    | μm                               |
| <b>Spatial Parameters</b>           |         |                                  |
| Sal                                 | 20.2    | μm                               |
| Str                                 | 0.622   |                                  |
| Std                                 | 129     | °                                |
| <b>Hybrid Parameters</b>            |         |                                  |
| Sdq                                 | 2.13    |                                  |
| Sdr                                 | 47.8    | %                                |
| <b>Functional Parameters (V...)</b> |         |                                  |
| Vm                                  | 0.171   | μm <sup>3</sup> /μm <sup>2</sup> |
| Vv                                  | 5.30    | μm <sup>3</sup> /μm <sup>2</sup> |
| Vmp                                 | 0.171   | μm <sup>3</sup> /μm <sup>2</sup> |
| Vmc                                 | 3.48    | μm <sup>3</sup> /μm <sup>2</sup> |
| Vvc                                 | 4.84    | μm <sup>3</sup> /μm <sup>2</sup> |
| Vvv                                 | 0.458   | μm <sup>3</sup> /μm <sup>2</sup> |
| <b>Functional Parameters (S...)</b> |         |                                  |
| Sk                                  | 5.58    | μm                               |
| Spk                                 | 2.26    | μm                               |
| Svk                                 | 2.99    | μm                               |
| Smr1                                | 10.7    | %                                |
| Smr2                                | 87.4    | %                                |
| Spq                                 | *****   |                                  |
| Svq                                 | *****   |                                  |
| Smq                                 | *****   |                                  |

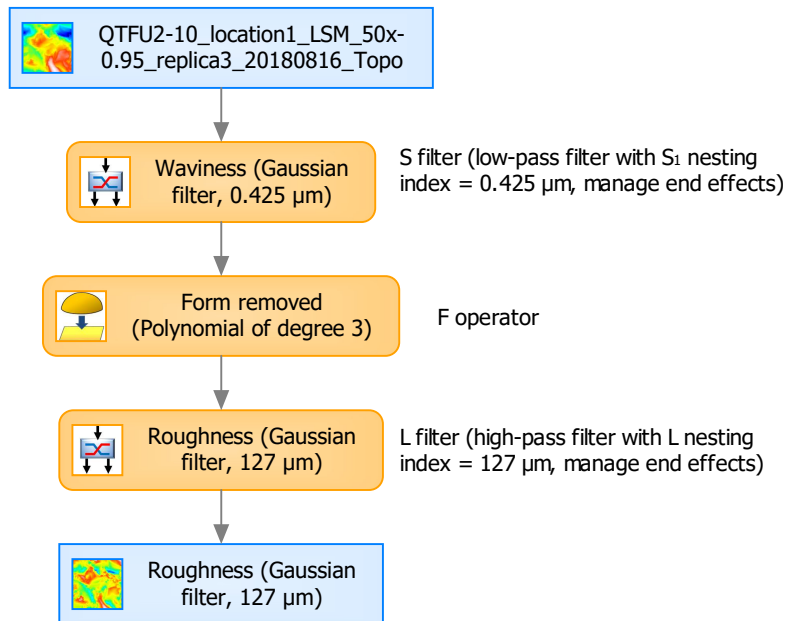

**Quartzite QTFU2-10**  
**50x objective, NA = 0.75 or 0.95**

| Identity card - QTFU2-10_location2_LSM_5... |                                                |        |  |
|---------------------------------------------|------------------------------------------------|--------|--|
| Name:                                       | QTFU2-10_location2_LSM_50x-0.75_replica1_20... |        |  |
| Created on:                                 | 8/17/2018 10:48:46 AM                          |        |  |
| <b>Axis: X</b>                              |                                                |        |  |
| Length:                                     | 255                                            | μm     |  |
| Size:                                       | 3000                                           | points |  |
| Spacing:                                    | 85.2                                           | nm     |  |
| <b>Axis: Y</b>                              |                                                |        |  |
| Length:                                     | 255                                            | μm     |  |
| Size:                                       | 3000                                           | points |  |
| Spacing:                                    | 85.2                                           | nm     |  |
| <b>Axis: Z</b>                              |                                                |        |  |
| Length:                                     | 82.5                                           | μm     |  |
| Size:                                       | 65532                                          | digits |  |
| Spacing:                                    | 1.26                                           | nm     |  |
| NMP ratio:                                  | 0.00 % (0 Pts)                                 |        |  |

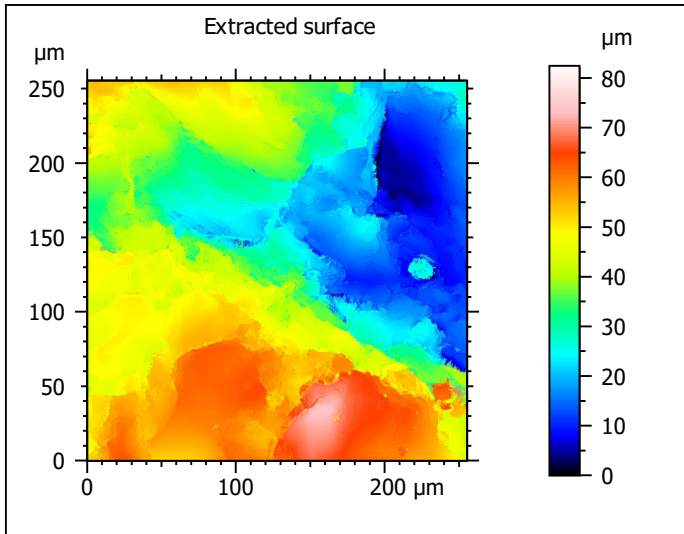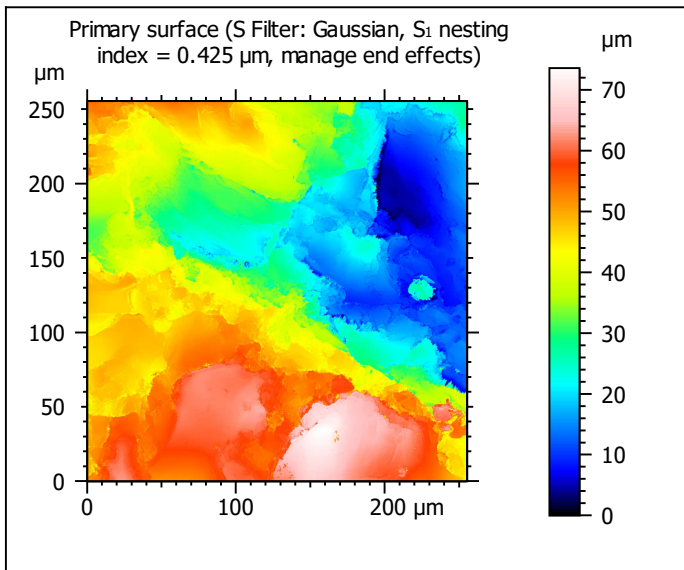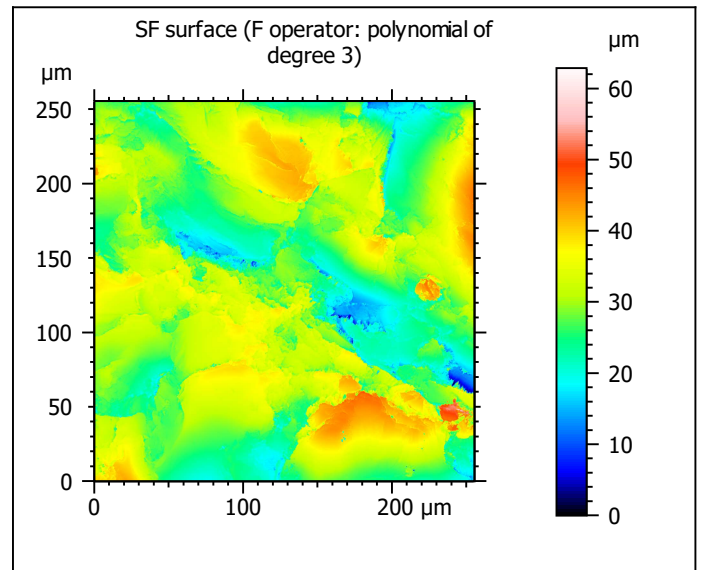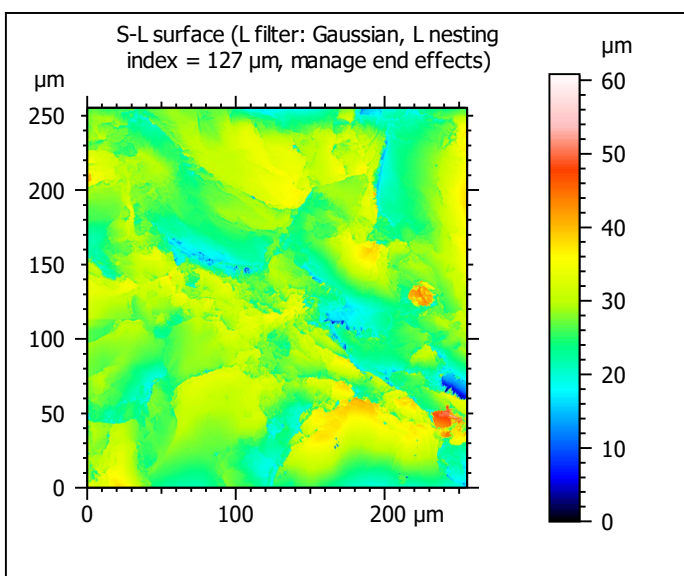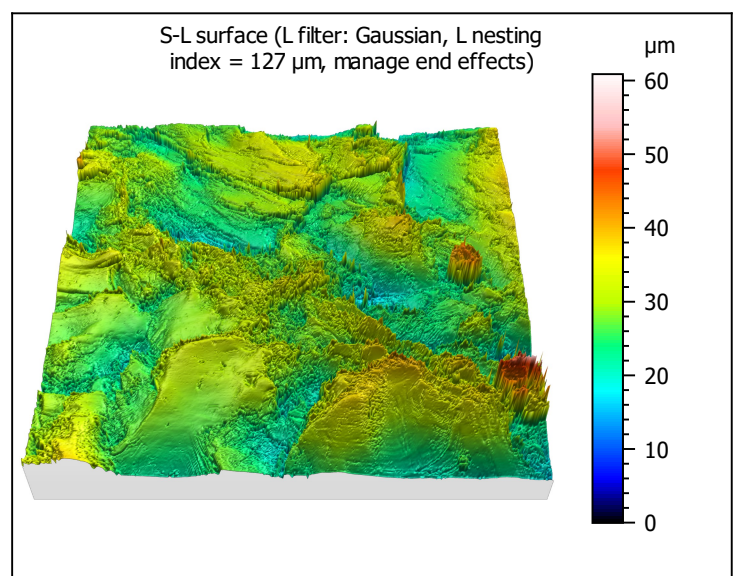

| ISO 25178                             |                                     |
|---------------------------------------|-------------------------------------|
| <b>Height Parameters</b>              |                                     |
| Sq                                    | 4.55 $\mu\text{m}$                  |
| Ssk                                   | -0.0139                             |
| Sku                                   | 4.29                                |
| Sp                                    | 33.3 $\mu\text{m}$                  |
| Sv                                    | 27.6 $\mu\text{m}$                  |
| Sz                                    | 60.9 $\mu\text{m}$                  |
| Sa                                    | 3.50 $\mu\text{m}$                  |
| <b>Functional Parameters</b>          |                                     |
| Smr                                   | 7.78e-05 %                          |
| Smc                                   | 5.70 $\mu\text{m}$                  |
| Sxp                                   | 9.05 $\mu\text{m}$                  |
| <b>Spatial Parameters</b>             |                                     |
| Sal                                   | 19.4 $\mu\text{m}$                  |
| Str                                   | 0.734                               |
| Std                                   | 150 $^\circ$                        |
| <b>Hybrid Parameters</b>              |                                     |
| Sdq                                   | 6.63                                |
| Sdr                                   | 190 %                               |
| <b>Functional Parameters (Vol...)</b> |                                     |
| Vm                                    | 0.231 $\mu\text{m}^3/\mu\text{m}^2$ |
| Vv                                    | 5.94 $\mu\text{m}^3/\mu\text{m}^2$  |
| Vmp                                   | 0.231 $\mu\text{m}^3/\mu\text{m}^2$ |
| Vmc                                   | 3.91 $\mu\text{m}^3/\mu\text{m}^2$  |
| Vvc                                   | 5.39 $\mu\text{m}^3/\mu\text{m}^2$  |
| Vvv                                   | 0.548 $\mu\text{m}^3/\mu\text{m}^2$ |
| <b>Functional Parameters (Str...)</b> |                                     |
| Sk                                    | 6.35 $\mu\text{m}$                  |
| Spk                                   | 4.27 $\mu\text{m}$                  |
| Svk                                   | 4.30 $\mu\text{m}$                  |
| Smr1                                  | 11.9 %                              |
| Smr2                                  | 86.6 %                              |
| Spq                                   | *****                               |
| Svq                                   | *****                               |
| Smq                                   | *****                               |

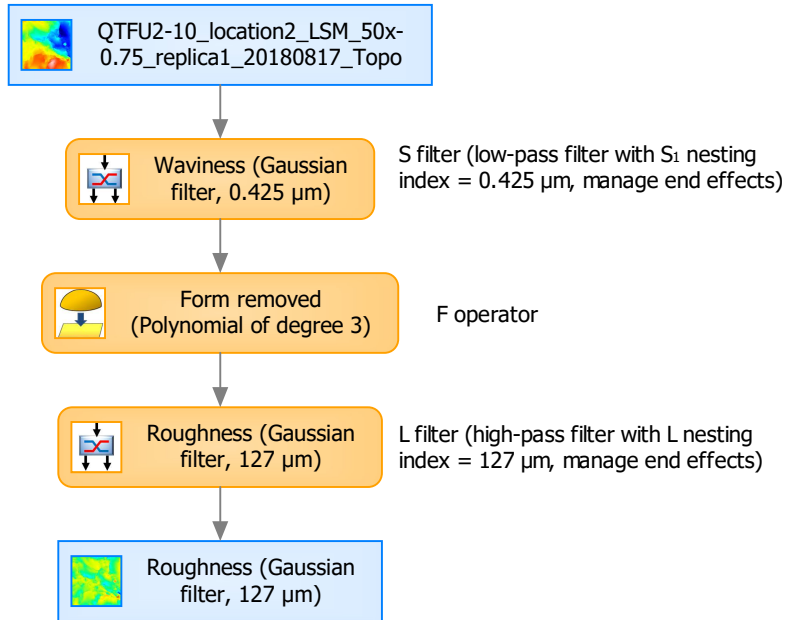

**Quartzite QTFU2-10**  
**50x objective, NA = 0.75 or 0.95**

| Identity card - QTFU2-10_location2_LSM_5... |                                                |        |  |
|---------------------------------------------|------------------------------------------------|--------|--|
| Name:                                       | QTFU2-10_location2_LSM_50x-0.75_replica2_20... |        |  |
| Created on:                                 | 8/17/2018 11:37:03 AM                          |        |  |
| <b>Axis: X</b>                              |                                                |        |  |
| Length:                                     | 255                                            | μm     |  |
| Size:                                       | 3000                                           | points |  |
| Spacing:                                    | 85.2                                           | nm     |  |
| <b>Axis: Y</b>                              |                                                |        |  |
| Length:                                     | 255                                            | μm     |  |
| Size:                                       | 3000                                           | points |  |
| Spacing:                                    | 85.2                                           | nm     |  |
| <b>Axis: Z</b>                              |                                                |        |  |
| Length:                                     | 81.3                                           | μm     |  |
| Size:                                       | 65532                                          | digits |  |
| Spacing:                                    | 1.24                                           | nm     |  |
| NMP ratio:                                  | 0.00 % (0 Pts)                                 |        |  |

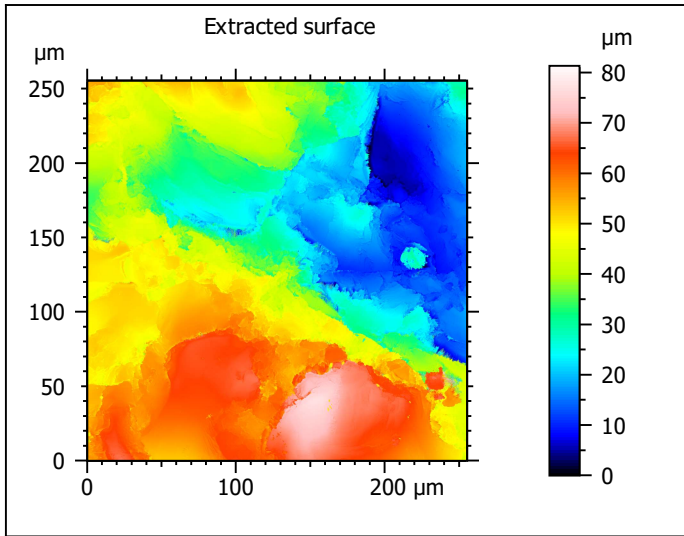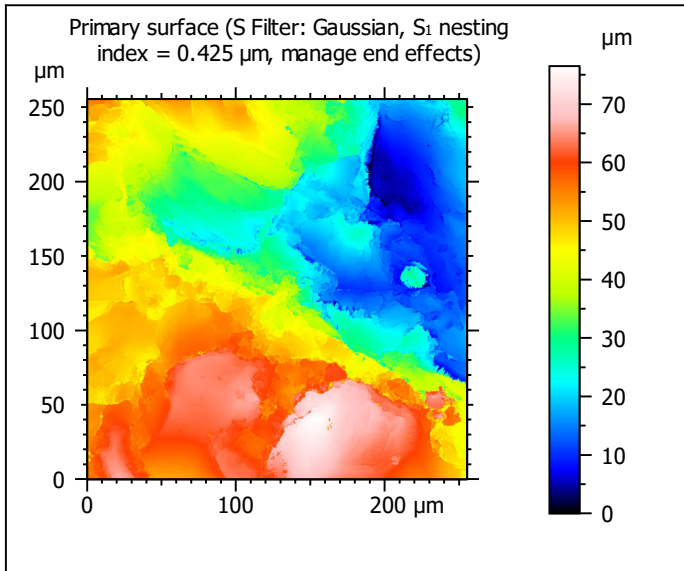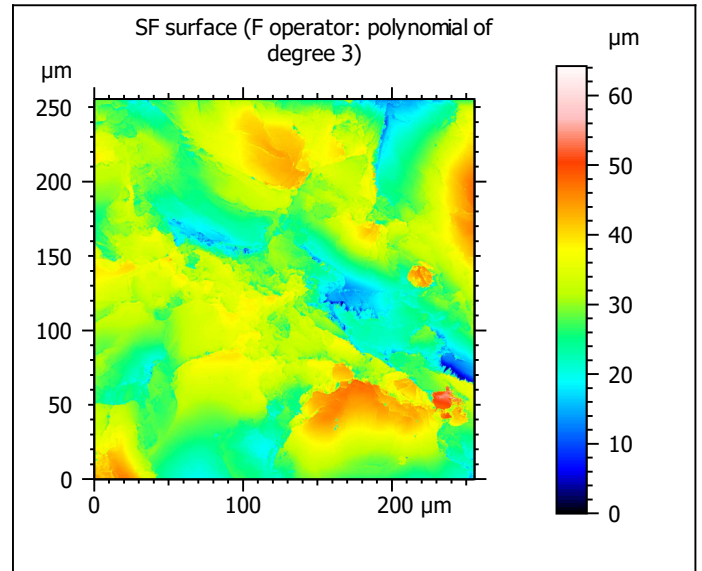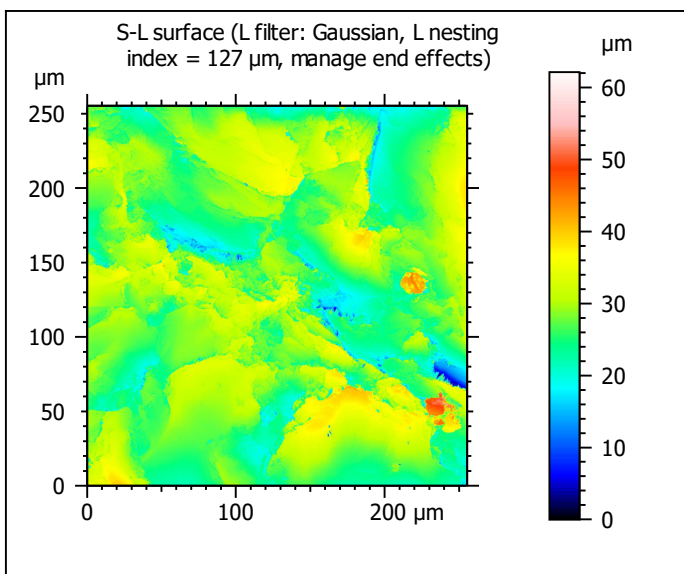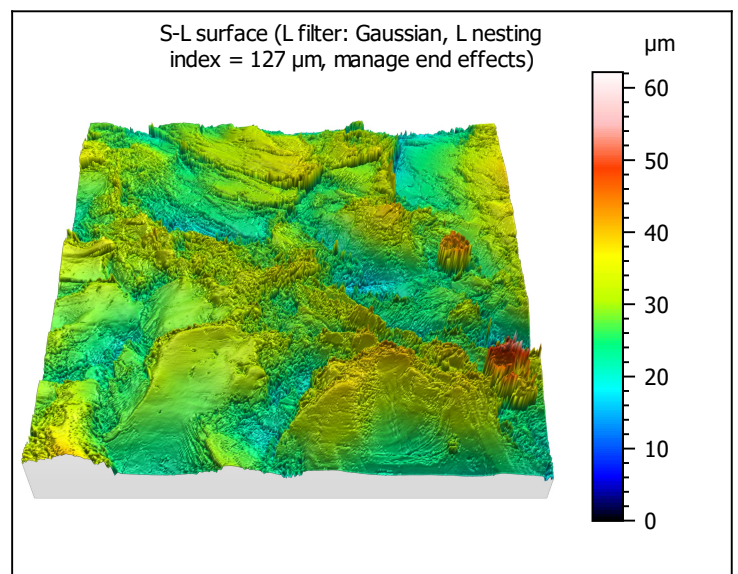

| ISO 25178                             |                                     |
|---------------------------------------|-------------------------------------|
| <b>Height Parameters</b>              |                                     |
| Sq                                    | 4.68 $\mu\text{m}$                  |
| Ssk                                   | -0.00798                            |
| Sku                                   | 4.35                                |
| Sp                                    | 34.2 $\mu\text{m}$                  |
| Sv                                    | 27.9 $\mu\text{m}$                  |
| Sz                                    | 62.2 $\mu\text{m}$                  |
| Sa                                    | 3.60 $\mu\text{m}$                  |
| <b>Functional Parameters</b>          |                                     |
| Smr                                   | 5.65e-05 %                          |
| Smc                                   | 5.81 $\mu\text{m}$                  |
| Sxp                                   | 9.24 $\mu\text{m}$                  |
| <b>Spatial Parameters</b>             |                                     |
| Sal                                   | 19.8 $\mu\text{m}$                  |
| Str                                   | 0.778                               |
| Std                                   | 150 $^\circ$                        |
| <b>Hybrid Parameters</b>              |                                     |
| Sdq                                   | 6.76                                |
| Sdr                                   | 196 %                               |
| <b>Functional Parameters (Vol...)</b> |                                     |
| Vm                                    | 0.244 $\mu\text{m}^3/\mu\text{m}^2$ |
| Vv                                    | 6.05 $\mu\text{m}^3/\mu\text{m}^2$  |
| Vmp                                   | 0.244 $\mu\text{m}^3/\mu\text{m}^2$ |
| Vmc                                   | 4.01 $\mu\text{m}^3/\mu\text{m}^2$  |
| Vvc                                   | 5.50 $\mu\text{m}^3/\mu\text{m}^2$  |
| Vvv                                   | 0.550 $\mu\text{m}^3/\mu\text{m}^2$ |
| <b>Functional Parameters (Str...)</b> |                                     |
| Sk                                    | 6.56 $\mu\text{m}$                  |
| Spk                                   | 4.47 $\mu\text{m}$                  |
| Svk                                   | 4.48 $\mu\text{m}$                  |
| Smr1                                  | 11.4 %                              |
| Smr2                                  | 86.9 %                              |
| Spq                                   | *****                               |
| Svq                                   | *****                               |
| Smq                                   | *****                               |

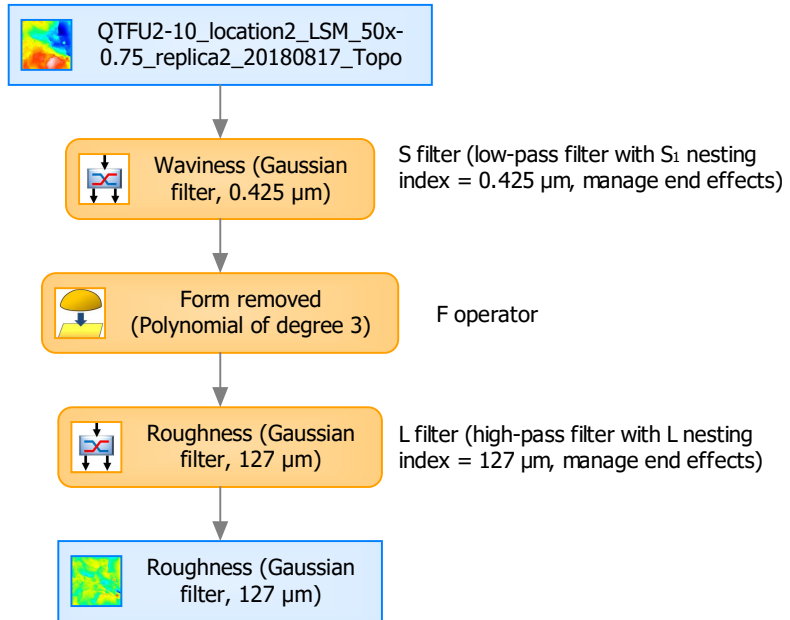

**Quartzite QTFU2-10**  
**50x objective, NA = 0.75 or 0.95**

| Identity card - QTFU2-10_location2_LSM_5... |                                                |               |  |
|---------------------------------------------|------------------------------------------------|---------------|--|
| Name:                                       | QTFU2-10_location2_LSM_50x-0.75_replica3_20... |               |  |
| Created on:                                 | 8/17/2018 12:27:24 PM                          |               |  |
| <b>Axis: X</b>                              |                                                |               |  |
| Length:                                     | 255                                            | $\mu\text{m}$ |  |
| Size:                                       | 3000                                           | points        |  |
| Spacing:                                    | 85.2                                           | nm            |  |
| <b>Axis: Y</b>                              |                                                |               |  |
| Length:                                     | 255                                            | $\mu\text{m}$ |  |
| Size:                                       | 3000                                           | points        |  |
| Spacing:                                    | 85.2                                           | nm            |  |
| <b>Axis: Z</b>                              |                                                |               |  |
| Length:                                     | 80.2                                           | $\mu\text{m}$ |  |
| Size:                                       | 65532                                          | digits        |  |
| Spacing:                                    | 1.22                                           | nm            |  |
| NMP ratio:                                  | 0.00 % (0 Pts)                                 |               |  |

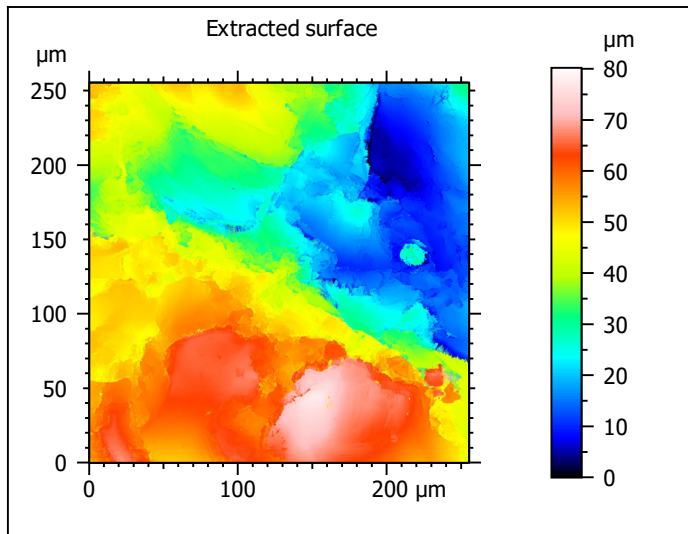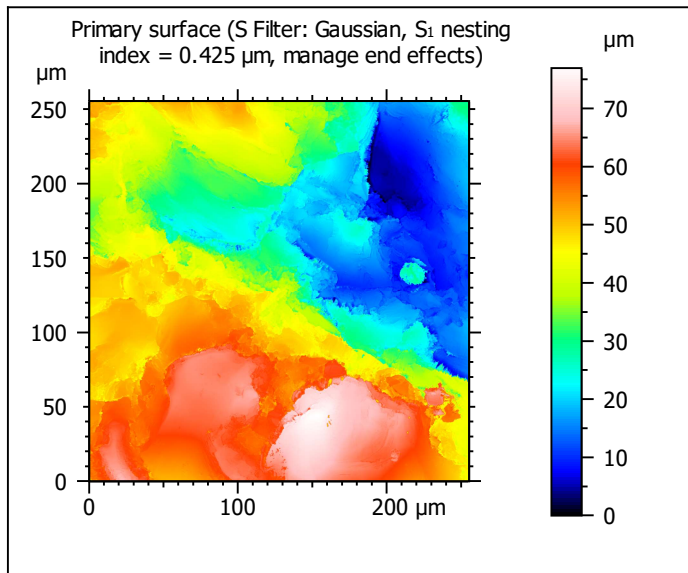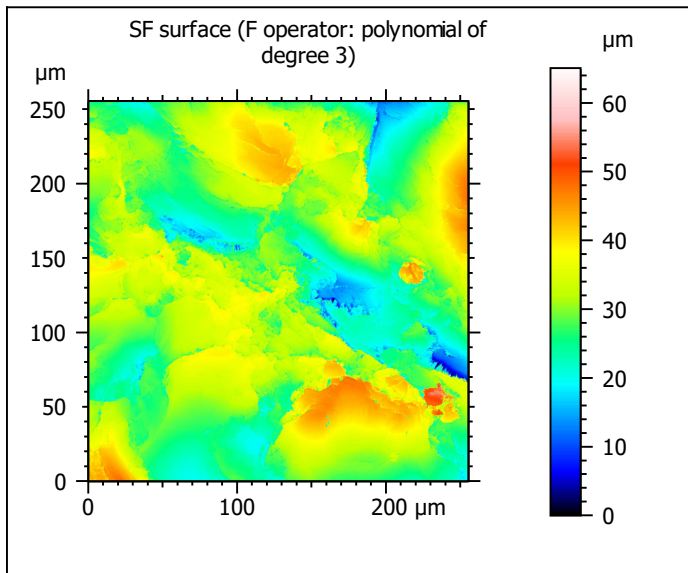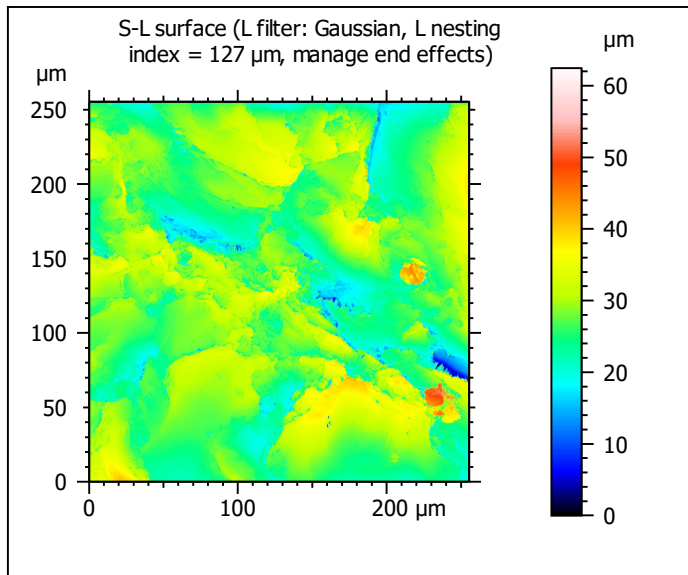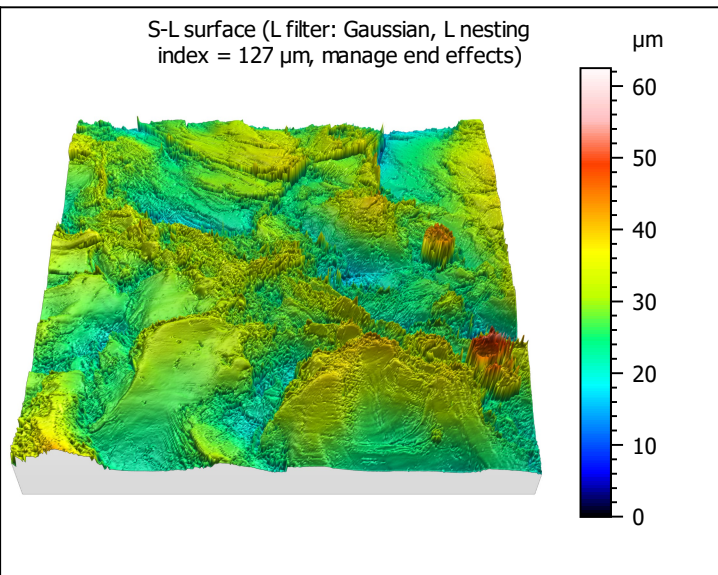

| ISO 25178                             |                                     |
|---------------------------------------|-------------------------------------|
| <b>Height Parameters</b>              |                                     |
| Sq                                    | 4.70 $\mu\text{m}$                  |
| Ssk                                   | -0.00636                            |
| Sku                                   | 4.41                                |
| Sp                                    | 34.9 $\mu\text{m}$                  |
| Sv                                    | 27.6 $\mu\text{m}$                  |
| Sz                                    | 62.5 $\mu\text{m}$                  |
| Sa                                    | 3.62 $\mu\text{m}$                  |
| <b>Functional Parameters</b>          |                                     |
| Smr                                   | 4.44e-05 %                          |
| Smc                                   | 5.82 $\mu\text{m}$                  |
| Sxp                                   | 9.29 $\mu\text{m}$                  |
| <b>Spatial Parameters</b>             |                                     |
| Sal                                   | 19.7 $\mu\text{m}$                  |
| Str                                   | 0.763                               |
| Std                                   | 150 $^{\circ}$                      |
| <b>Hybrid Parameters</b>              |                                     |
| Sdq                                   | 6.75                                |
| Sdr                                   | 196 %                               |
| <b>Functional Parameters (Vol...)</b> |                                     |
| Vm                                    | 0.251 $\mu\text{m}^3/\mu\text{m}^2$ |
| Vv                                    | 6.07 $\mu\text{m}^3/\mu\text{m}^2$  |
| Vmp                                   | 0.251 $\mu\text{m}^3/\mu\text{m}^2$ |
| Vmc                                   | 3.97 $\mu\text{m}^3/\mu\text{m}^2$  |
| Vvc                                   | 5.51 $\mu\text{m}^3/\mu\text{m}^2$  |
| Vvv                                   | 0.563 $\mu\text{m}^3/\mu\text{m}^2$ |
| <b>Functional Parameters (Str...)</b> |                                     |
| Sk                                    | 6.44 $\mu\text{m}$                  |
| Spk                                   | 4.56 $\mu\text{m}$                  |
| Svk                                   | 4.53 $\mu\text{m}$                  |
| Smr1                                  | 11.8 %                              |
| Smr2                                  | 86.5 %                              |
| Spq                                   | *****                               |
| Svq                                   | *****                               |
| Smq                                   | *****                               |

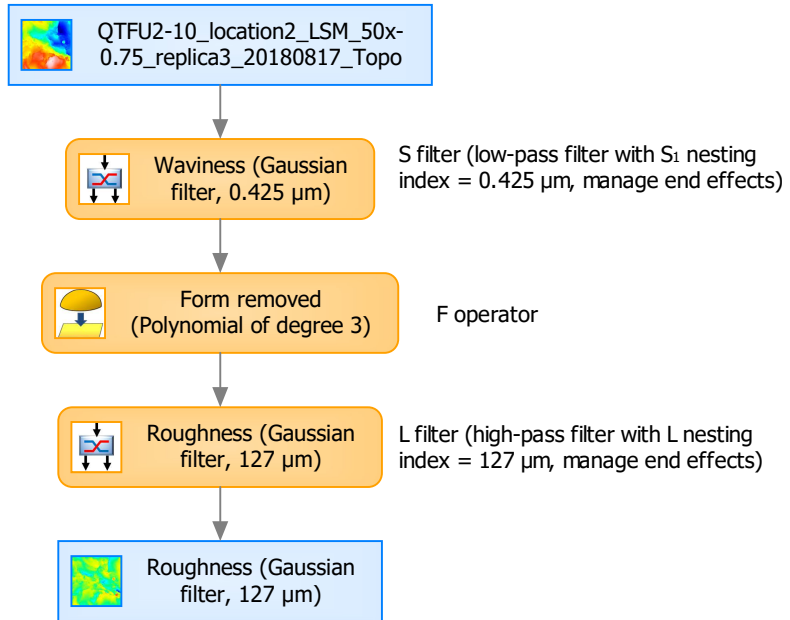

**Quartzite QTFU2-10**  
**50x objective, NA = 0.75 or 0.95**

| Identity card - QTFU2-10_location2_LSM_5... |                                                |        |  |
|---------------------------------------------|------------------------------------------------|--------|--|
| Name:                                       | QTFU2-10_location2_LSM_50x-0.95_replica1_20... |        |  |
| Created on:                                 | 8/17/2018 10:22:20 AM                          |        |  |
| <b>Axis: X</b>                              |                                                |        |  |
| Length:                                     | 255                                            | μm     |  |
| Size:                                       | 3000                                           | points |  |
| Spacing:                                    | 85.2                                           | nm     |  |
| <b>Axis: Y</b>                              |                                                |        |  |
| Length:                                     | 255                                            | μm     |  |
| Size:                                       | 3000                                           | points |  |
| Spacing:                                    | 85.2                                           | nm     |  |
| <b>Axis: Z</b>                              |                                                |        |  |
| Length:                                     | 77.0                                           | μm     |  |
| Size:                                       | 65532                                          | digits |  |
| Spacing:                                    | 1.18                                           | nm     |  |
| NMP ratio:                                  | 0.00 % (0 Pts)                                 |        |  |

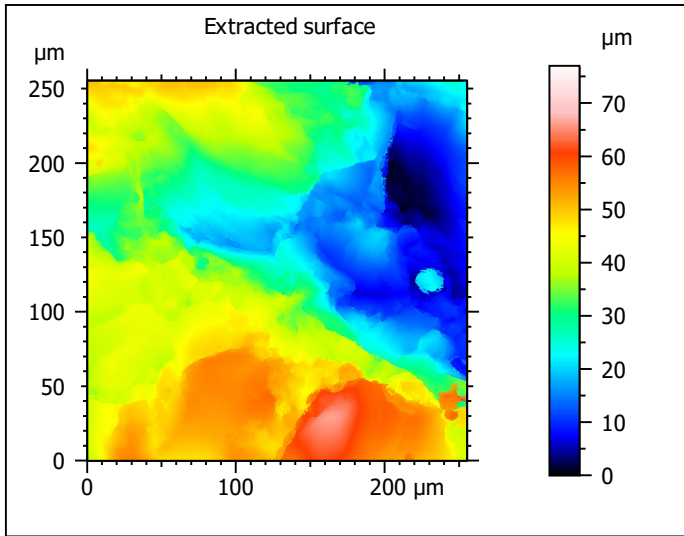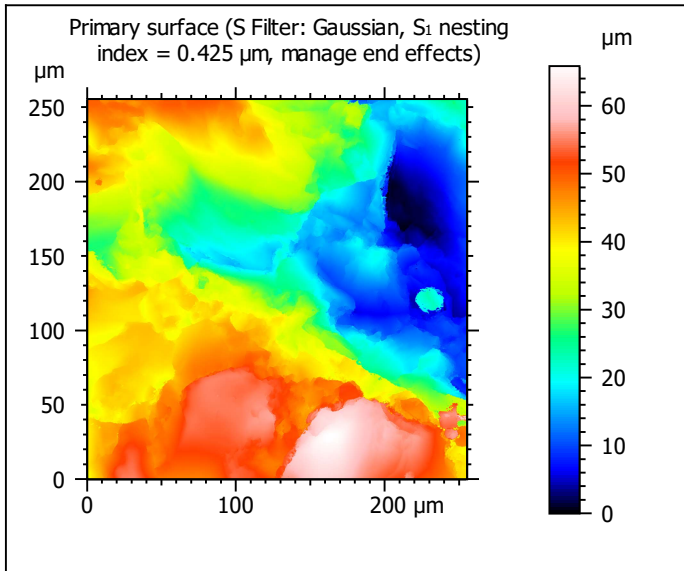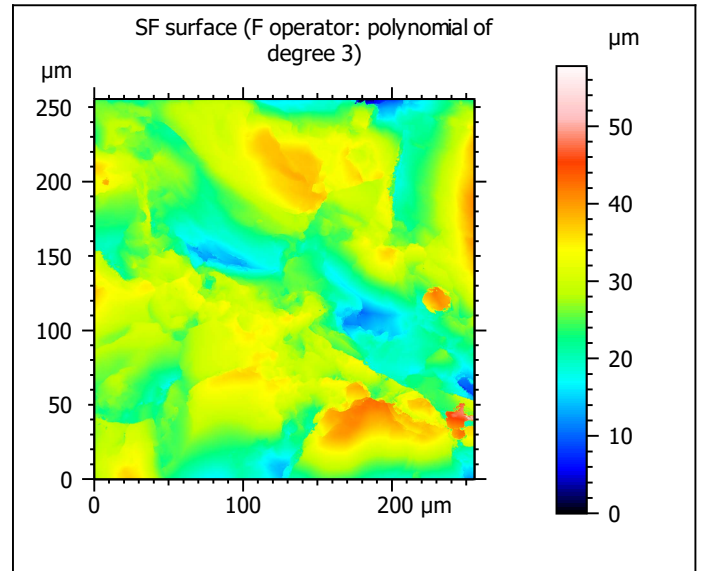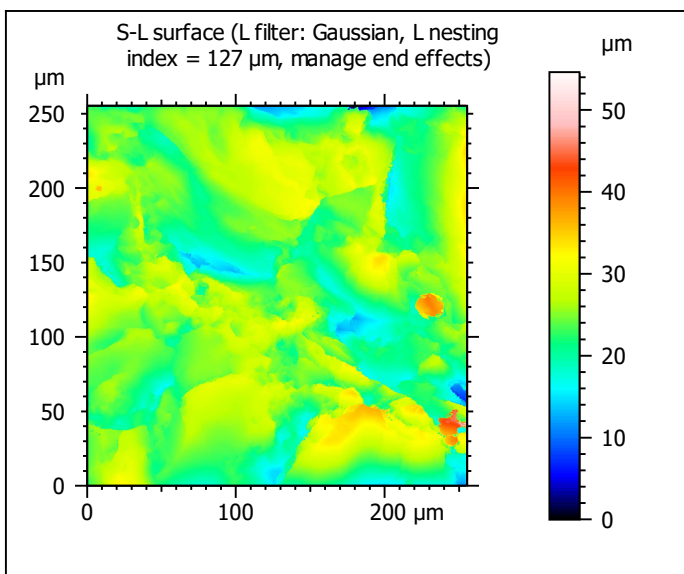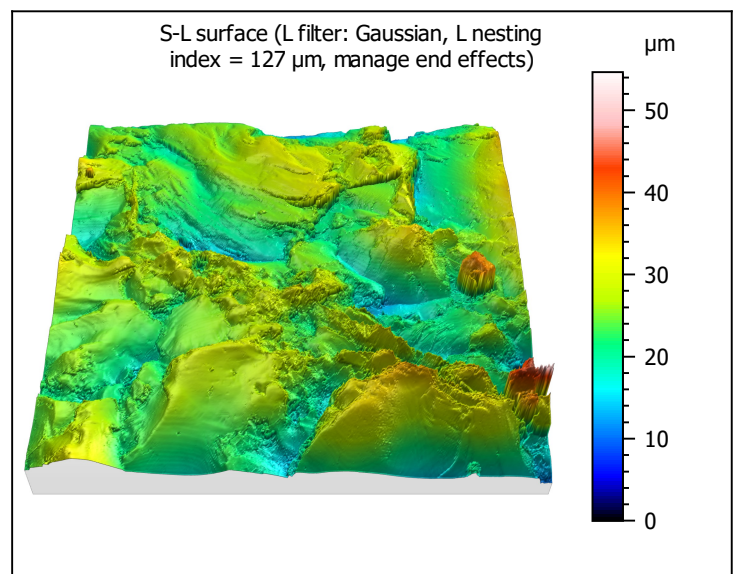



| ISO 25178                             |                                     |
|---------------------------------------|-------------------------------------|
| <b>Height Parameters</b>              |                                     |
| Sq                                    | 4.17 $\mu\text{m}$                  |
| Ssk                                   | 0.0218                              |
| Sku                                   | 4.33                                |
| Sp                                    | 30.2 $\mu\text{m}$                  |
| Sv                                    | 24.5 $\mu\text{m}$                  |
| Sz                                    | 54.7 $\mu\text{m}$                  |
| Sa                                    | 3.19 $\mu\text{m}$                  |
| <b>Functional Parameters</b>          |                                     |
| Smr                                   | 2.55e-05 %                          |
| Smc                                   | 5.16 $\mu\text{m}$                  |
| Sxp                                   | 8.43 $\mu\text{m}$                  |
| <b>Spatial Parameters</b>             |                                     |
| Sal                                   | 19.1 $\mu\text{m}$                  |
| Str                                   | 0.634                               |
| Std                                   | 147 $^\circ$                        |
| <b>Hybrid Parameters</b>              |                                     |
| Sdq                                   | 3.39                                |
| Sdr                                   | 63.6 %                              |
| <b>Functional Parameters (Vol...)</b> |                                     |
| Vm                                    | 0.214 $\mu\text{m}^3/\mu\text{m}^2$ |
| Vv                                    | 5.38 $\mu\text{m}^3/\mu\text{m}^2$  |
| Vmp                                   | 0.214 $\mu\text{m}^3/\mu\text{m}^2$ |
| Vmc                                   | 3.56 $\mu\text{m}^3/\mu\text{m}^2$  |
| Vvc                                   | 4.86 $\mu\text{m}^3/\mu\text{m}^2$  |
| Vvv                                   | 0.516 $\mu\text{m}^3/\mu\text{m}^2$ |
| <b>Functional Parameters (Str...)</b> |                                     |
| Sk                                    | 5.44 $\mu\text{m}$                  |
| Spk                                   | 3.84 $\mu\text{m}$                  |
| Svk                                   | 3.74 $\mu\text{m}$                  |
| Smr1                                  | 13.1 %                              |
| Smr2                                  | 86.1 %                              |
| Spq                                   | *****                               |
| Svq                                   | *****                               |
| Smq                                   | *****                               |

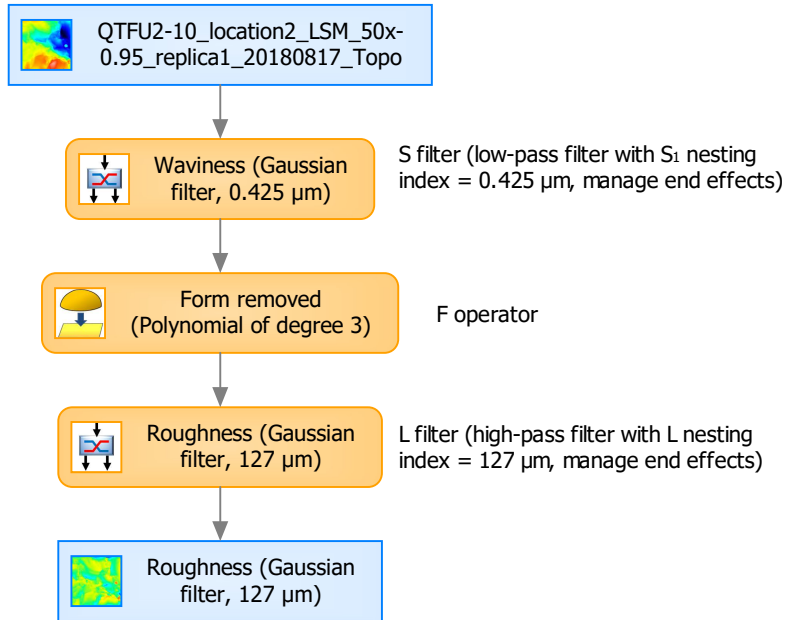

**Quartzite QTFU2-10**  
**50x objective, NA = 0.75 or 0.95**

| Identity card - QTFU2-10_location2_LSM_5... |                                                |               |  |
|---------------------------------------------|------------------------------------------------|---------------|--|
| Name:                                       | QTFU2-10_location2_LSM_50x-0.95_replica2_20... |               |  |
| Created on:                                 | 8/17/2018 11:12:17 AM                          |               |  |
| <b>Axis: X</b>                              |                                                |               |  |
| Length:                                     | 255                                            | $\mu\text{m}$ |  |
| Size:                                       | 3000                                           | points        |  |
| Spacing:                                    | 85.2                                           | nm            |  |
| <b>Axis: Y</b>                              |                                                |               |  |
| Length:                                     | 255                                            | $\mu\text{m}$ |  |
| Size:                                       | 3000                                           | points        |  |
| Spacing:                                    | 85.2                                           | nm            |  |
| <b>Axis: Z</b>                              |                                                |               |  |
| Length:                                     | 76.4                                           | $\mu\text{m}$ |  |
| Size:                                       | 65531                                          | digits        |  |
| Spacing:                                    | 1.17                                           | nm            |  |
| NMP ratio:                                  | 0.00 % (0 Pts)                                 |               |  |

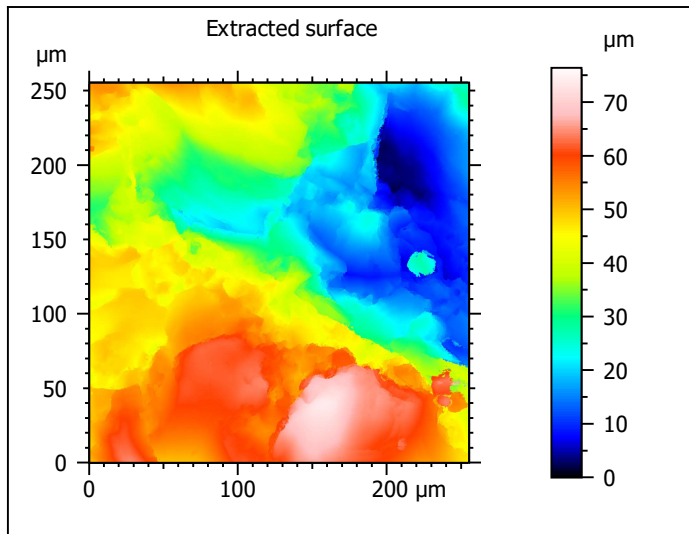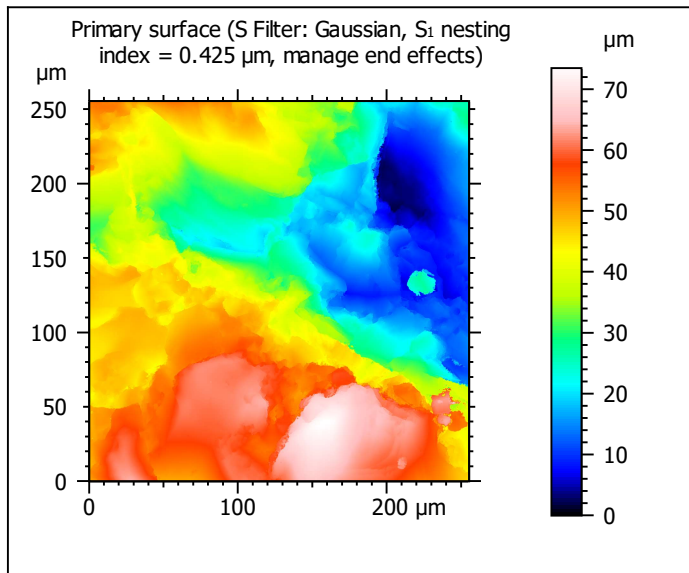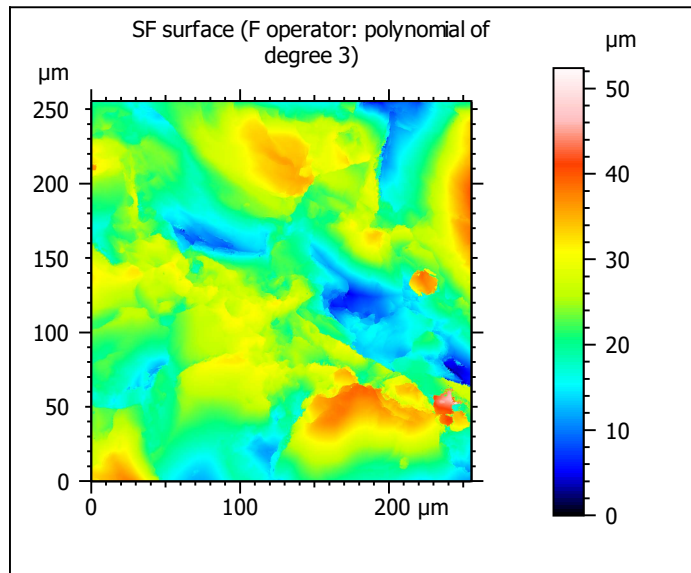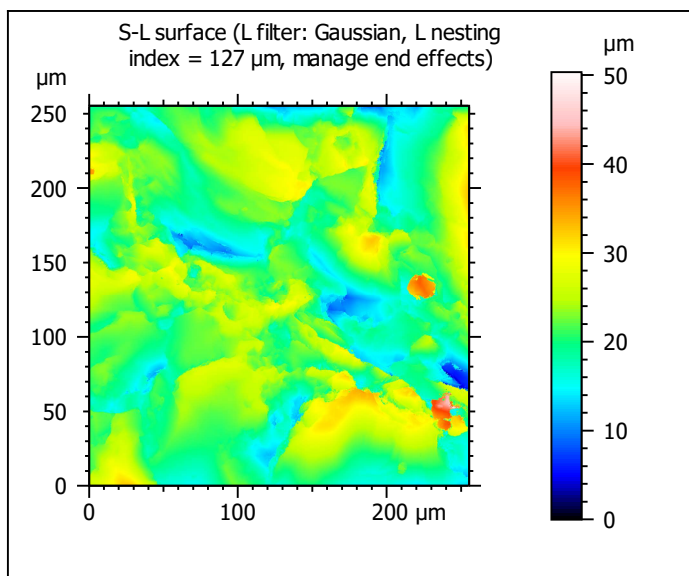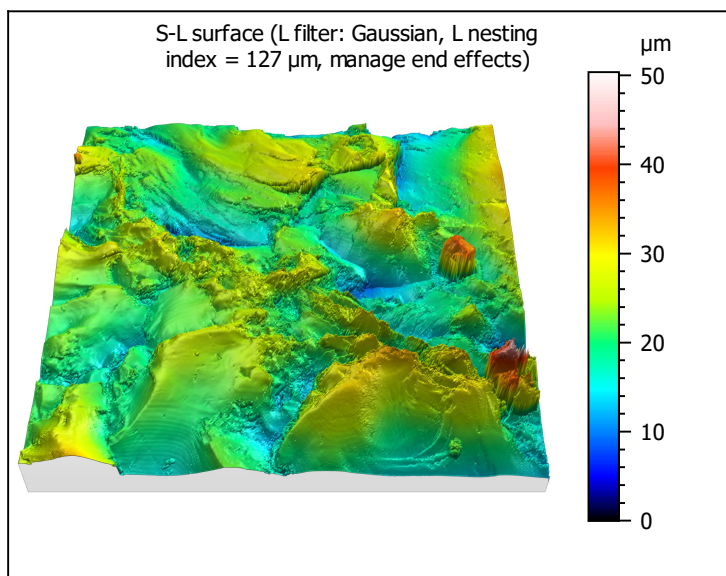

| ISO 25178                             |                                     |
|---------------------------------------|-------------------------------------|
| <b>Height Parameters</b>              |                                     |
| Sq                                    | 4.45 $\mu\text{m}$                  |
| Ssk                                   | 0.203                               |
| Sku                                   | 3.97                                |
| Sp                                    | 28.8 $\mu\text{m}$                  |
| Sv                                    | 21.6 $\mu\text{m}$                  |
| Sz                                    | 50.4 $\mu\text{m}$                  |
| Sa                                    | 3.44 $\mu\text{m}$                  |
| <b>Functional Parameters</b>          |                                     |
| Smr                                   | 0.000605 %                          |
| Smc                                   | 5.64 $\mu\text{m}$                  |
| Sxp                                   | 8.38 $\mu\text{m}$                  |
| <b>Spatial Parameters</b>             |                                     |
| Sal                                   | 20.4 $\mu\text{m}$                  |
| Str                                   | 0.785                               |
| Std                                   | 147 $^\circ$                        |
| <b>Hybrid Parameters</b>              |                                     |
| Sdq                                   | 3.68                                |
| Sdr                                   | 70.1 %                              |
| <b>Functional Parameters (Vol...)</b> |                                     |
| Vm                                    | 0.239 $\mu\text{m}^3/\mu\text{m}^2$ |
| Vv                                    | 5.88 $\mu\text{m}^3/\mu\text{m}^2$  |
| Vmp                                   | 0.239 $\mu\text{m}^3/\mu\text{m}^2$ |
| Vmc                                   | 3.89 $\mu\text{m}^3/\mu\text{m}^2$  |
| Vvc                                   | 5.38 $\mu\text{m}^3/\mu\text{m}^2$  |
| Vvv                                   | 0.496 $\mu\text{m}^3/\mu\text{m}^2$ |
| <b>Functional Parameters (Str...)</b> |                                     |
| Sk                                    | 6.23 $\mu\text{m}$                  |
| Spk                                   | 4.13 $\mu\text{m}$                  |
| Svk                                   | 3.65 $\mu\text{m}$                  |
| Smr1                                  | 11.9 %                              |
| Smr2                                  | 87.7 %                              |
| Spq                                   | *****                               |
| Svq                                   | *****                               |
| Smq                                   | *****                               |

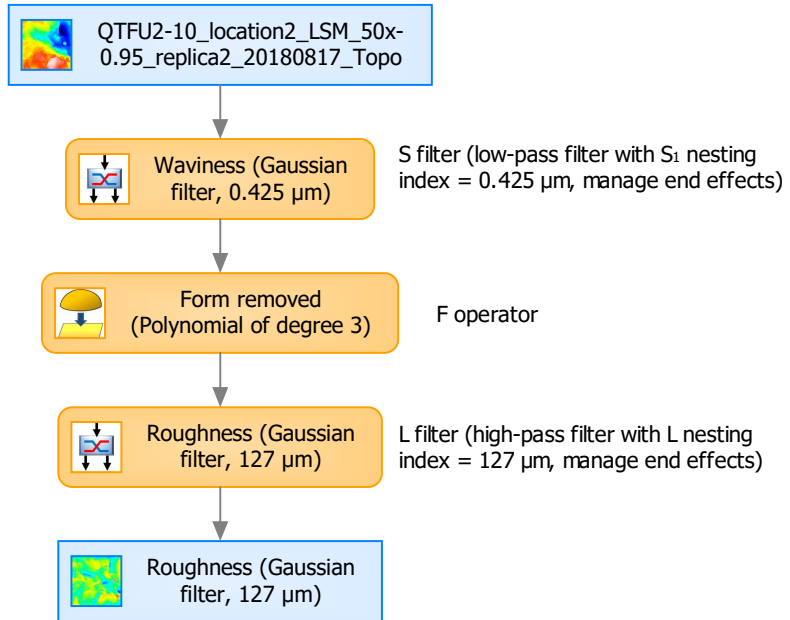

**Quartzite QTFU2-10**  
**50x objective, NA = 0.75 or 0.95**

| Identity card - QTFU2-10_location2_LSM_5... |                                                |        |  |
|---------------------------------------------|------------------------------------------------|--------|--|
| Name:                                       | QTFU2-10_location2_LSM_50x-0.95_replica3_20... |        |  |
| Created on:                                 | 8/17/2018 12:00:25 PM                          |        |  |
| <b>Axis: X</b>                              |                                                |        |  |
| Length:                                     | 255                                            | μm     |  |
| Size:                                       | 3000                                           | points |  |
| Spacing:                                    | 85.2                                           | nm     |  |
| <b>Axis: Y</b>                              |                                                |        |  |
| Length:                                     | 255                                            | μm     |  |
| Size:                                       | 3000                                           | points |  |
| Spacing:                                    | 85.2                                           | nm     |  |
| <b>Axis: Z</b>                              |                                                |        |  |
| Length:                                     | 76.5                                           | μm     |  |
| Size:                                       | 65532                                          | digits |  |
| Spacing:                                    | 1.17                                           | nm     |  |
| NMP ratio:                                  | 0.00 % (0 Pts)                                 |        |  |

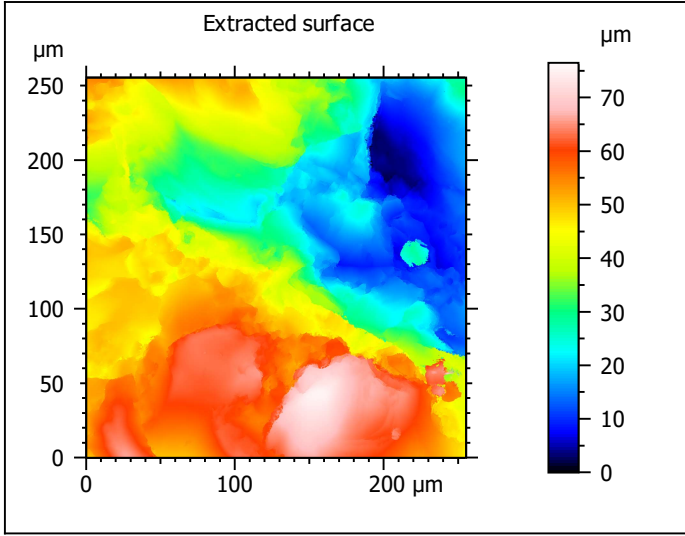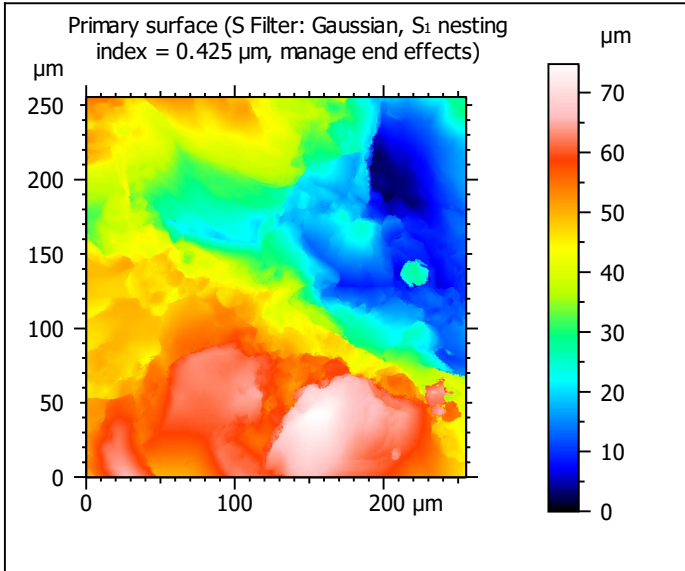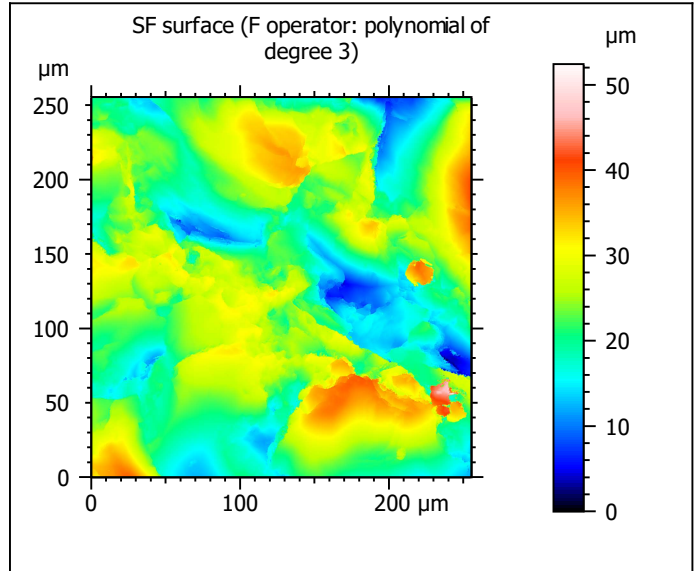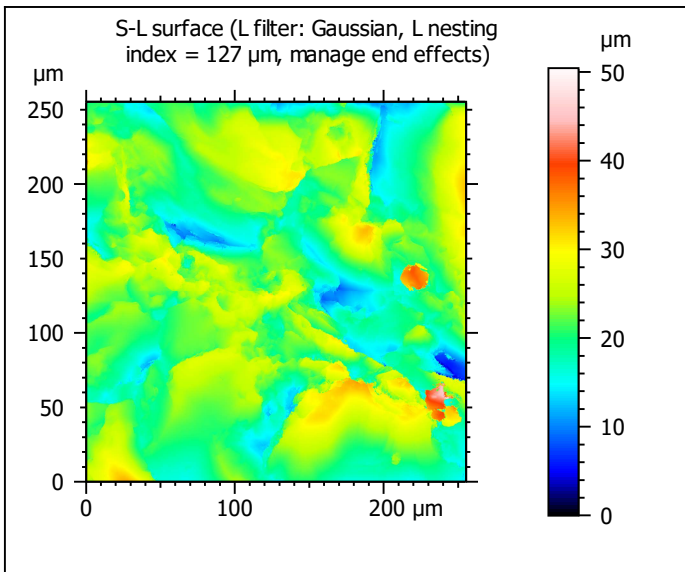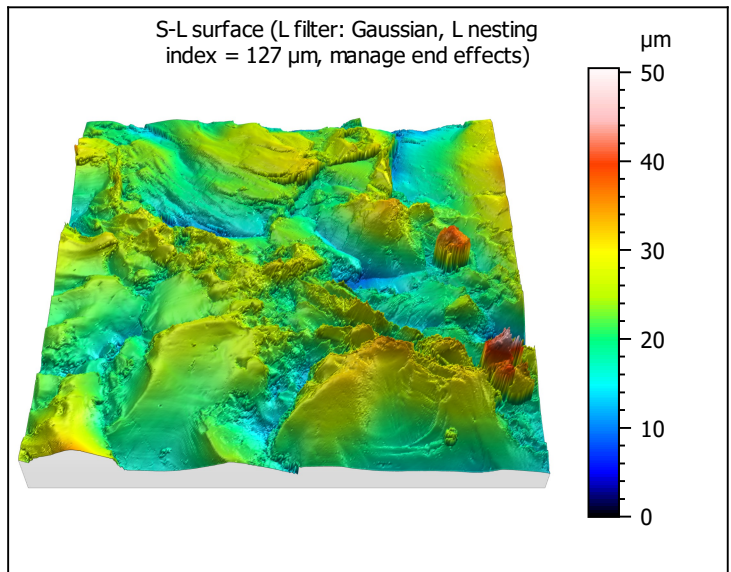

| ISO 25178                             |                                     |
|---------------------------------------|-------------------------------------|
| <b>Height Parameters</b>              |                                     |
| Sq                                    | 4.51 $\mu\text{m}$                  |
| Ssk                                   | 0.205                               |
| Sku                                   | 4.01                                |
| Sp                                    | 28.6 $\mu\text{m}$                  |
| Sv                                    | 21.9 $\mu\text{m}$                  |
| Sz                                    | 50.5 $\mu\text{m}$                  |
| Sa                                    | 3.49 $\mu\text{m}$                  |
| <b>Functional Parameters</b>          |                                     |
| Smr                                   | 0.000474 %                          |
| Smc                                   | 5.68 $\mu\text{m}$                  |
| Sxp                                   | 8.57 $\mu\text{m}$                  |
| <b>Spatial Parameters</b>             |                                     |
| Sal                                   | 20.5 $\mu\text{m}$                  |
| Str                                   | 0.811                               |
| Std                                   | 147 $^\circ$                        |
| <b>Hybrid Parameters</b>              |                                     |
| Sdq                                   | 3.73                                |
| Sdr                                   | 70.8 %                              |
| <b>Functional Parameters (Vol...)</b> |                                     |
| Vm                                    | 0.247 $\mu\text{m}^3/\mu\text{m}^2$ |
| Vv                                    | 5.93 $\mu\text{m}^3/\mu\text{m}^2$  |
| Vmp                                   | 0.247 $\mu\text{m}^3/\mu\text{m}^2$ |
| Vmc                                   | 3.92 $\mu\text{m}^3/\mu\text{m}^2$  |
| Vvc                                   | 5.43 $\mu\text{m}^3/\mu\text{m}^2$  |
| Vvv                                   | 0.501 $\mu\text{m}^3/\mu\text{m}^2$ |
| <b>Functional Parameters (Str...)</b> |                                     |
| Sk                                    | 6.23 $\mu\text{m}$                  |
| Spk                                   | 4.28 $\mu\text{m}$                  |
| Svk                                   | 3.74 $\mu\text{m}$                  |
| Smr1                                  | 11.8 %                              |
| Smr2                                  | 87.4 %                              |
| Spq                                   | *****                               |
| Svq                                   | *****                               |
| Smq                                   | *****                               |

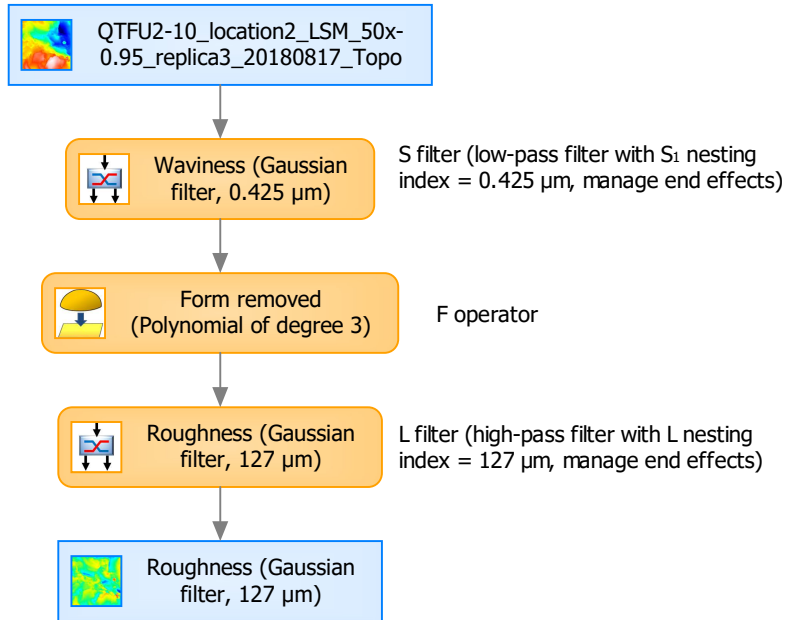

**Quartzite QTFU2-10**  
**50x objective, NA = 0.75 or 0.95**

| Identity card - QTFU2-10_location3_LSM_5... |                                                |               |  |
|---------------------------------------------|------------------------------------------------|---------------|--|
| Name:                                       | QTFU2-10_location3_LSM_50x-0.75_replica1_20... |               |  |
| Created on:                                 | 8/20/2018 1:59:54 PM                           |               |  |
| <b>Axis: X</b>                              |                                                |               |  |
| Length:                                     | 255                                            | $\mu\text{m}$ |  |
| Size:                                       | 3000                                           | points        |  |
| Spacing:                                    | 85.2                                           | nm            |  |
| <b>Axis: Y</b>                              |                                                |               |  |
| Length:                                     | 255                                            | $\mu\text{m}$ |  |
| Size:                                       | 3000                                           | points        |  |
| Spacing:                                    | 85.2                                           | nm            |  |
| <b>Axis: Z</b>                              |                                                |               |  |
| Length:                                     | 65.8                                           | $\mu\text{m}$ |  |
| Size:                                       | 65532                                          | digits        |  |
| Spacing:                                    | 1.00                                           | nm            |  |
| NMP ratio:                                  | 0.00 % (0 Pts)                                 |               |  |

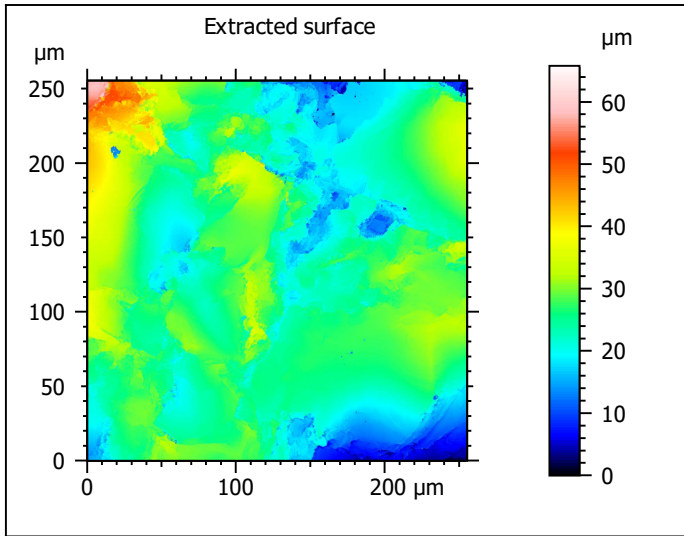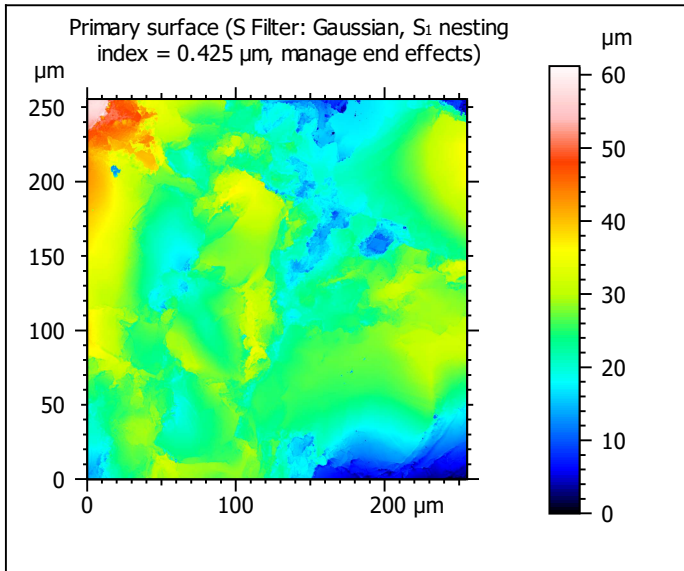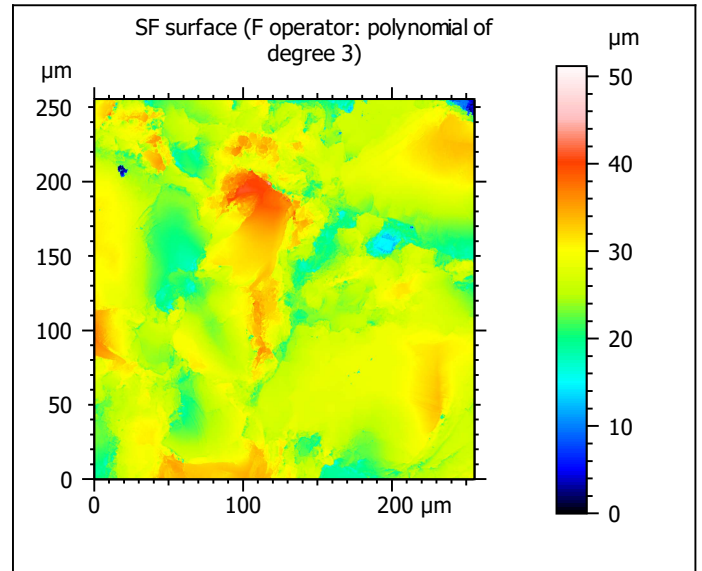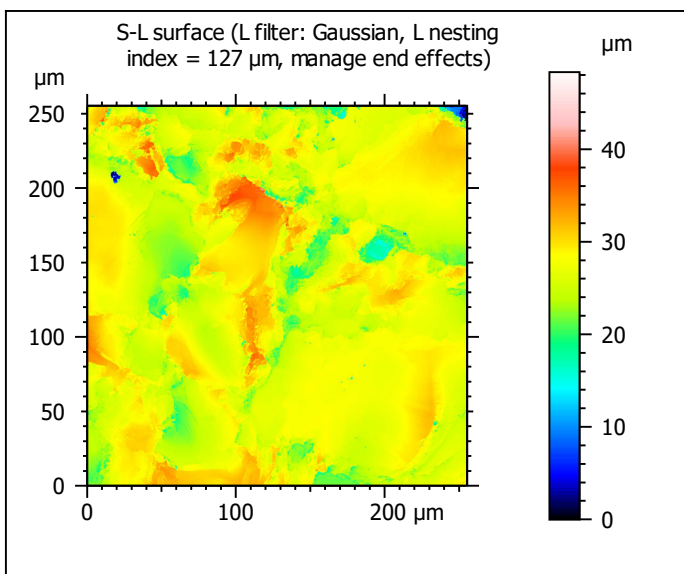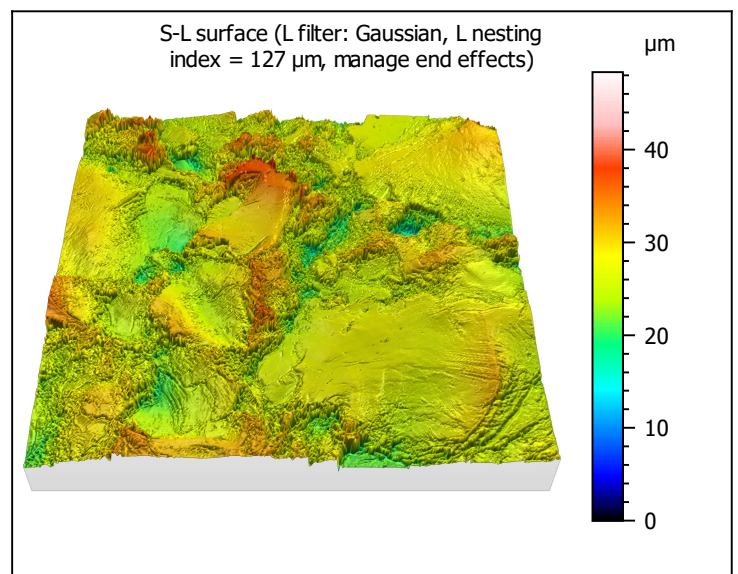

| ISO 25178                      |                                     |
|--------------------------------|-------------------------------------|
| Height Parameters              |                                     |
| Sq                             | 3.08 $\mu\text{m}$                  |
| Ssk                            | -0.811                              |
| Sku                            | 8.11                                |
| Sp                             | 21.4 $\mu\text{m}$                  |
| Sv                             | 27.0 $\mu\text{m}$                  |
| Sz                             | 48.3 $\mu\text{m}$                  |
| Sa                             | 2.27 $\mu\text{m}$                  |
| Functional Parameters          |                                     |
| Smr                            | 2.22e-05 %                          |
| Smc                            | 3.49 $\mu\text{m}$                  |
| Sxp                            | 6.45 $\mu\text{m}$                  |
| Spatial Parameters             |                                     |
| Sal                            | 15.6 $\mu\text{m}$                  |
| Str                            | 0.757                               |
| Std                            | 69.0 $^{\circ}$                     |
| Hybrid Parameters              |                                     |
| Sdq                            | 4.06                                |
| Sdr                            | 122 %                               |
| Functional Parameters (Vol...) |                                     |
| Vm                             | 0.160 $\mu\text{m}^3/\mu\text{m}^2$ |
| Vv                             | 3.65 $\mu\text{m}^3/\mu\text{m}^2$  |
| Vmp                            | 0.160 $\mu\text{m}^3/\mu\text{m}^2$ |
| Vmc                            | 2.44 $\mu\text{m}^3/\mu\text{m}^2$  |
| Vvc                            | 3.22 $\mu\text{m}^3/\mu\text{m}^2$  |
| Vvv                            | 0.436 $\mu\text{m}^3/\mu\text{m}^2$ |
| Functional Parameters (Str...) |                                     |
| Sk                             | 4.06 $\mu\text{m}$                  |
| Spk                            | 2.80 $\mu\text{m}$                  |
| Svk                            | 3.61 $\mu\text{m}$                  |
| Smr1                           | 13.6 %                              |
| Smr2                           | 84.2 %                              |
| Spq                            | 2.48                                |
| Svq                            | 17.3                                |
| Smq                            | 99.3                                |

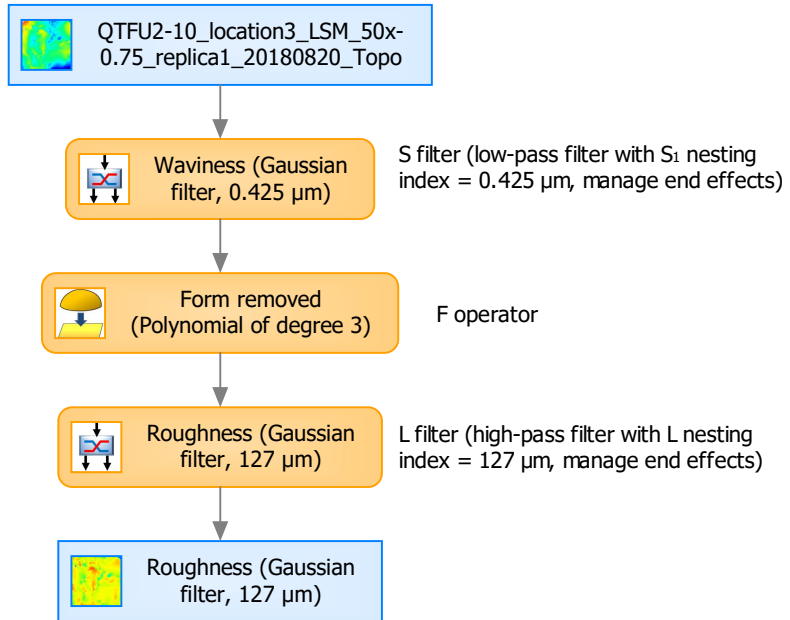

**Quartzite QTFU2-10**  
**50x objective, NA = 0.75 or 0.95**

| Identity card - QTFU2-10_location3_LSM_5... |                                                |        |  |
|---------------------------------------------|------------------------------------------------|--------|--|
| Name:                                       | QTFU2-10_location3_LSM_50x-0.75_replica2_20... |        |  |
| Created on:                                 | 8/20/2018 2:44:00 PM                           |        |  |
| <b>Axis: X</b>                              |                                                |        |  |
| Length:                                     | 255                                            | μm     |  |
| Size:                                       | 3000                                           | points |  |
| Spacing:                                    | 85.2                                           | nm     |  |
| <b>Axis: Y</b>                              |                                                |        |  |
| Length:                                     | 255                                            | μm     |  |
| Size:                                       | 3000                                           | points |  |
| Spacing:                                    | 85.2                                           | nm     |  |
| <b>Axis: Z</b>                              |                                                |        |  |
| Length:                                     | 64.1                                           | μm     |  |
| Size:                                       | 65531                                          | digits |  |
| Spacing:                                    | 0.978                                          | nm     |  |
| NMP ratio:                                  | 0.00 % (0 Pts)                                 |        |  |

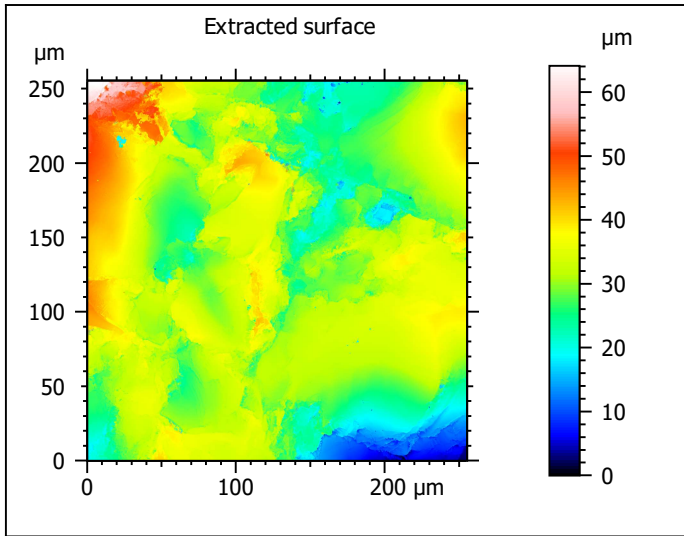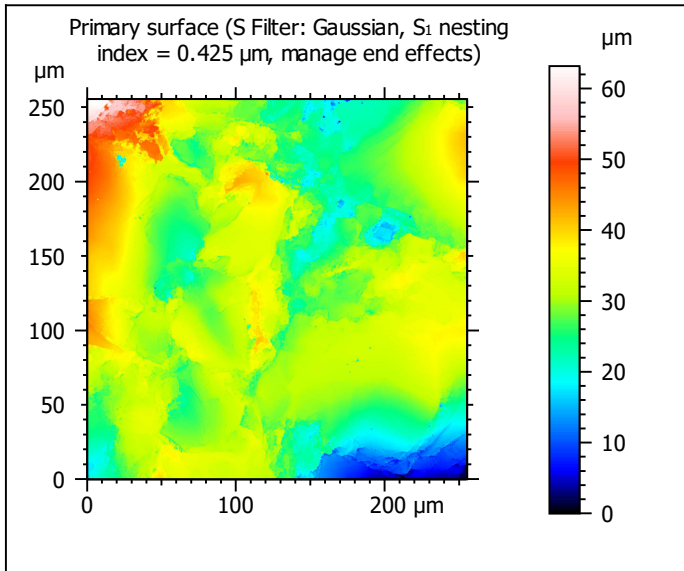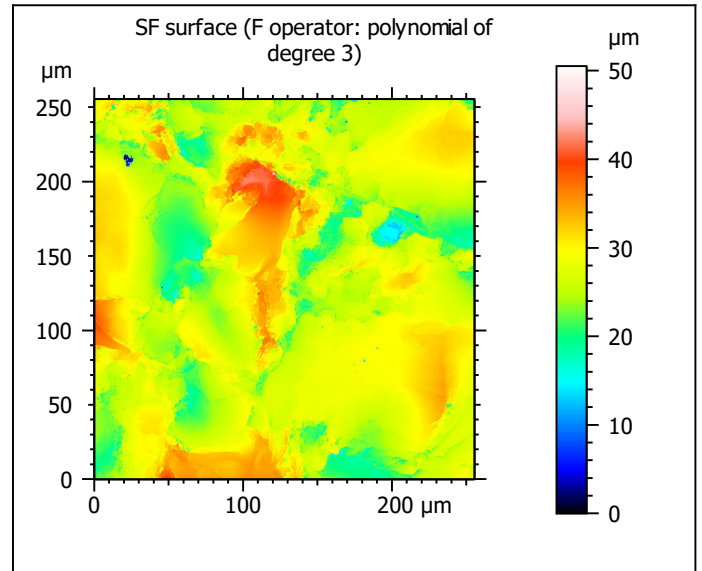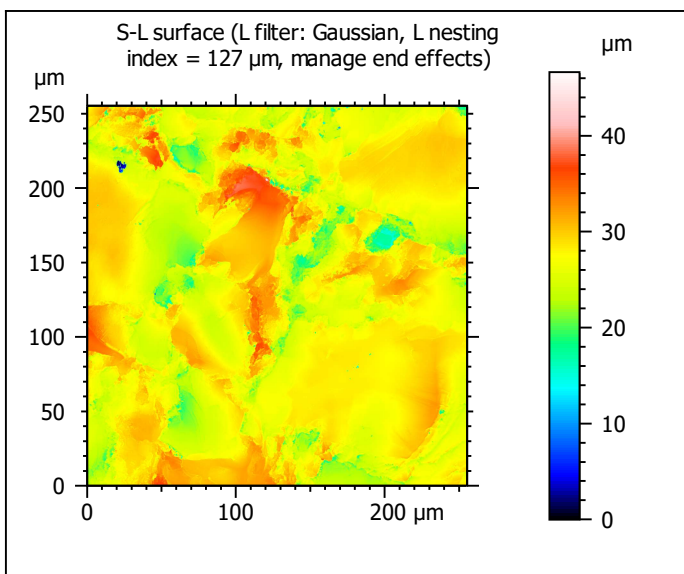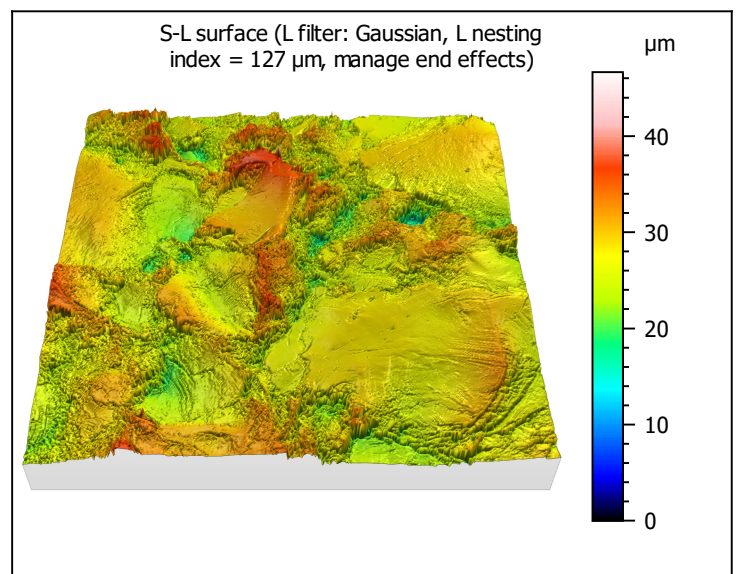



| ISO 25178                             |                                     |
|---------------------------------------|-------------------------------------|
| <b>Height Parameters</b>              |                                     |
| Sq                                    | 3.09 $\mu\text{m}$                  |
| Ssk                                   | -0.321                              |
| Sku                                   | 5.38                                |
| Sp                                    | 19.4 $\mu\text{m}$                  |
| Sv                                    | 27.3 $\mu\text{m}$                  |
| Sz                                    | 46.6 $\mu\text{m}$                  |
| Sa                                    | 2.35 $\mu\text{m}$                  |
| <b>Functional Parameters</b>          |                                     |
| Smr                                   | 0.000167 %                          |
| Smc                                   | 3.48 $\mu\text{m}$                  |
| Sxp                                   | 6.54 $\mu\text{m}$                  |
| <b>Spatial Parameters</b>             |                                     |
| Sal                                   | 16.5 $\mu\text{m}$                  |
| Str                                   | 0.704                               |
| Std                                   | 73.0 $^{\circ}$                     |
| <b>Hybrid Parameters</b>              |                                     |
| Sdq                                   | 4.14                                |
| Sdr                                   | 127 %                               |
| <b>Functional Parameters (Vol...)</b> |                                     |
| Vm                                    | 0.185 $\mu\text{m}^3/\mu\text{m}^2$ |
| Vv                                    | 3.66 $\mu\text{m}^3/\mu\text{m}^2$  |
| Vmp                                   | 0.185 $\mu\text{m}^3/\mu\text{m}^2$ |
| Vmc                                   | 2.55 $\mu\text{m}^3/\mu\text{m}^2$  |
| Vvc                                   | 3.25 $\mu\text{m}^3/\mu\text{m}^2$  |
| Vvv                                   | 0.411 $\mu\text{m}^3/\mu\text{m}^2$ |
| <b>Functional Parameters (Str...)</b> |                                     |
| Sk                                    | 4.17 $\mu\text{m}$                  |
| Spk                                   | 3.03 $\mu\text{m}$                  |
| Svk                                   | 3.43 $\mu\text{m}$                  |
| Smr1                                  | 12.5 %                              |
| Smr2                                  | 84.4 %                              |
| Spq                                   | *****                               |
| Svq                                   | *****                               |
| Smq                                   | *****                               |

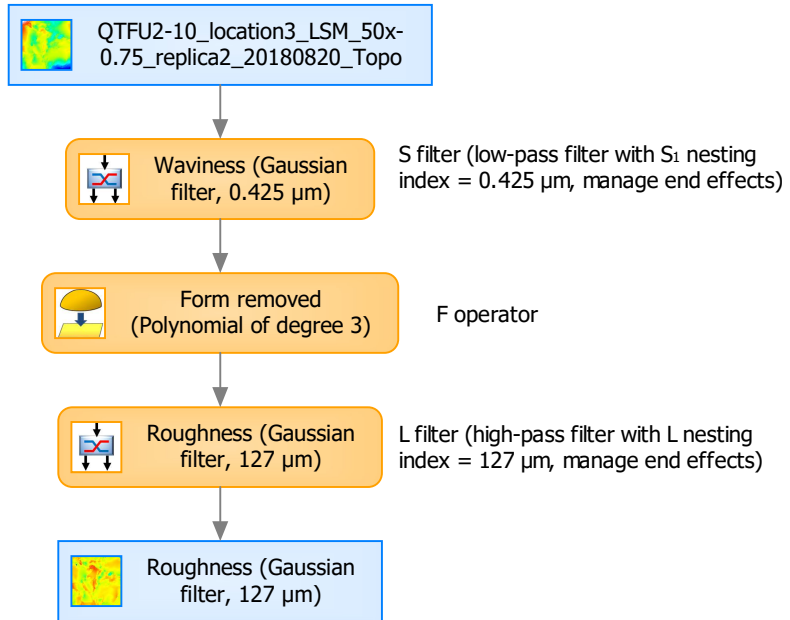

**Quartzite QTFU2-10**  
**50x objective, NA = 0.75 or 0.95**

| Identity card - QTFU2-10_location3_LSM_5... |                                                |        |  |
|---------------------------------------------|------------------------------------------------|--------|--|
| Name:                                       | QTFU2-10_location3_LSM_50x-0.75_replica3_20... |        |  |
| Created on:                                 | 8/20/2018 3:26:18 PM                           |        |  |
| <b>Axis: X</b>                              |                                                |        |  |
| Length:                                     | 255                                            | μm     |  |
| Size:                                       | 3000                                           | points |  |
| Spacing:                                    | 85.2                                           | nm     |  |
| <b>Axis: Y</b>                              |                                                |        |  |
| Length:                                     | 255                                            | μm     |  |
| Size:                                       | 3000                                           | points |  |
| Spacing:                                    | 85.2                                           | nm     |  |
| <b>Axis: Z</b>                              |                                                |        |  |
| Length:                                     | 63.4                                           | μm     |  |
| Size:                                       | 65532                                          | digits |  |
| Spacing:                                    | 0.967                                          | nm     |  |
| NMP ratio:                                  | 0.00 % (0 Pts)                                 |        |  |

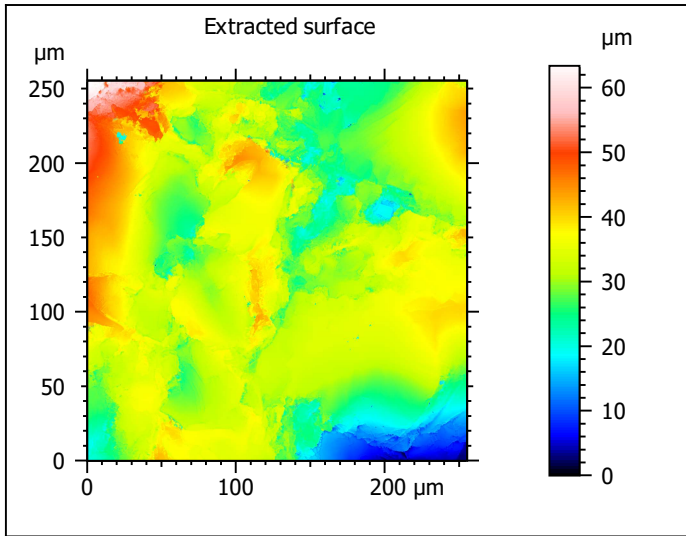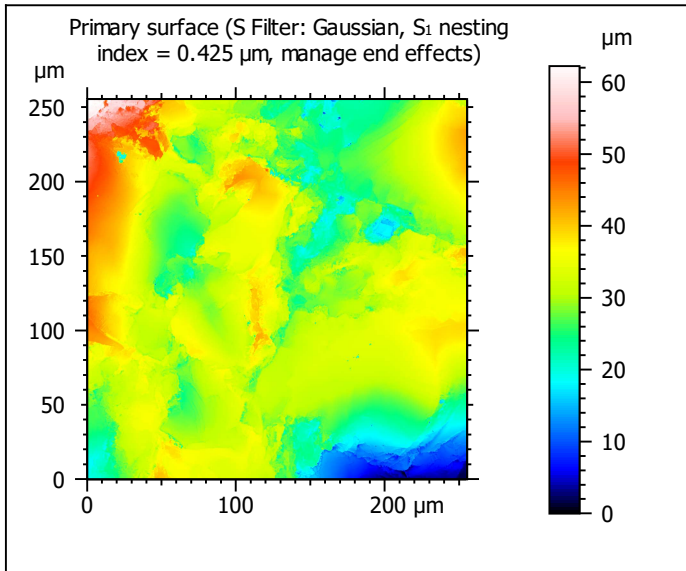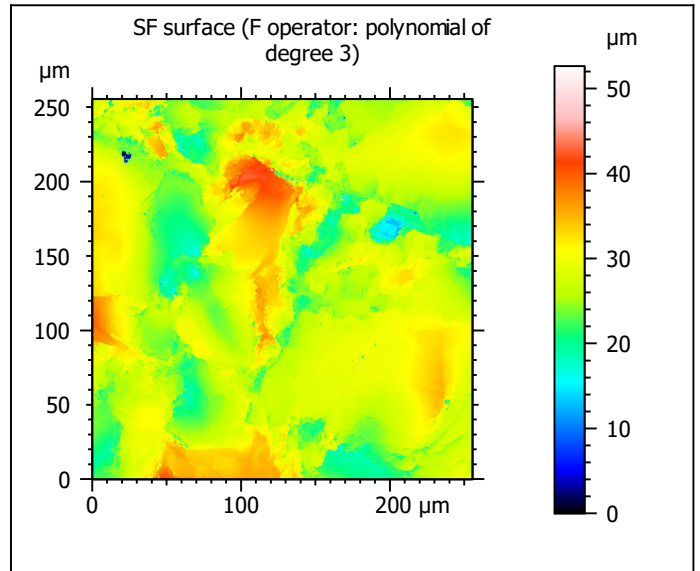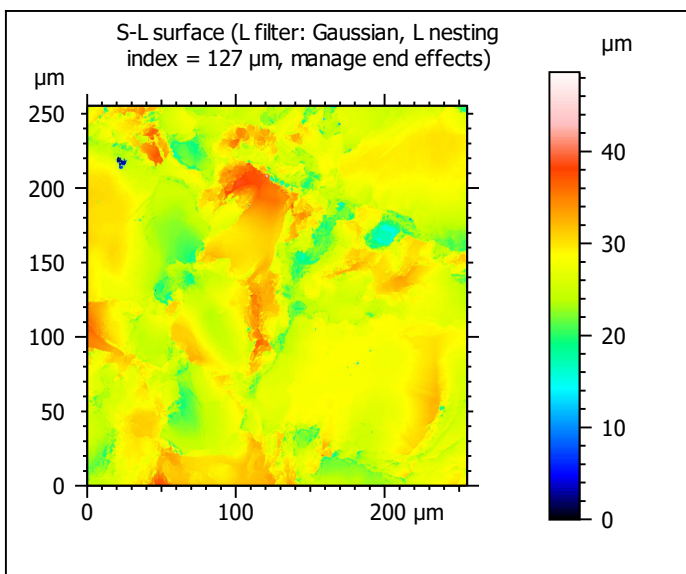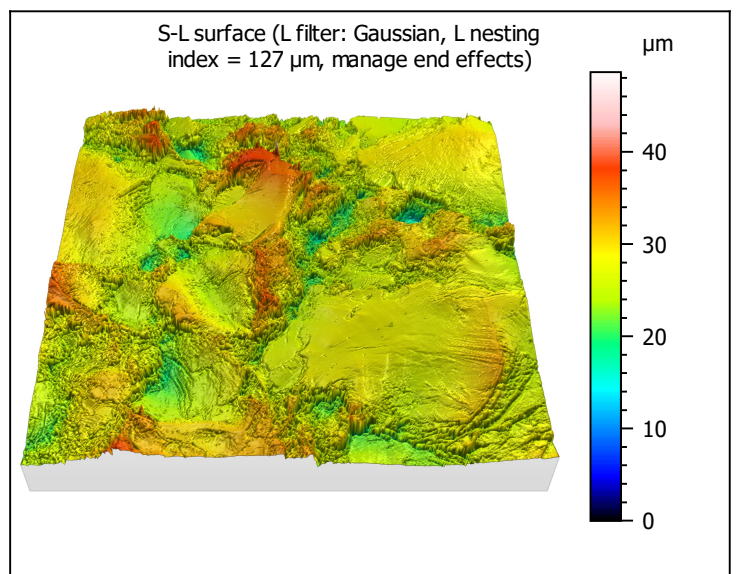

| ISO 25178                          |        |                                  |
|------------------------------------|--------|----------------------------------|
| <b>Height Parameters</b>           |        |                                  |
| Sq                                 | 3.14   | μm                               |
| Ssk                                | -0.283 |                                  |
| Sku                                | 5.17   |                                  |
| Sp                                 | 21.3   | μm                               |
| Sv                                 | 27.3   | μm                               |
| Sz                                 | 48.6   | μm                               |
| Sa                                 | 2.39   | μm                               |
| <b>Functional Parameters</b>       |        |                                  |
| Smr                                | 0.0001 | %                                |
| Smc                                | 3.53   | μm                               |
| Sxp                                | 6.64   | μm                               |
| <b>Spatial Parameters</b>          |        |                                  |
| Sal                                | 16.6   | μm                               |
| Str                                | 0.668  |                                  |
| Std                                | 69.2   | °                                |
| <b>Hybrid Parameters</b>           |        |                                  |
| Sdq                                | 4.17   |                                  |
| Sdr                                | 128    | %                                |
| <b>Functional Parameters (V...</b> |        |                                  |
| Vm                                 | 0.188  | μm <sup>3</sup> /μm <sup>2</sup> |
| Vv                                 | 3.72   | μm <sup>3</sup> /μm <sup>2</sup> |
| Vmp                                | 0.188  | μm <sup>3</sup> /μm <sup>2</sup> |
| Vmc                                | 2.60   | μm <sup>3</sup> /μm <sup>2</sup> |
| Vvc                                | 3.30   | μm <sup>3</sup> /μm <sup>2</sup> |
| Vvv                                | 0.413  | μm <sup>3</sup> /μm <sup>2</sup> |
| <b>Functional Parameters (S...</b> |        |                                  |
| Sk                                 | 4.20   | μm                               |
| Spk                                | 3.08   | μm                               |
| Svk                                | 3.42   | μm                               |
| Smr1                               | 12.8   | %                                |
| Smr2                               | 84.0   | %                                |
| Spq                                | *****  |                                  |
| Svq                                | *****  |                                  |
| Smq                                | *****  |                                  |

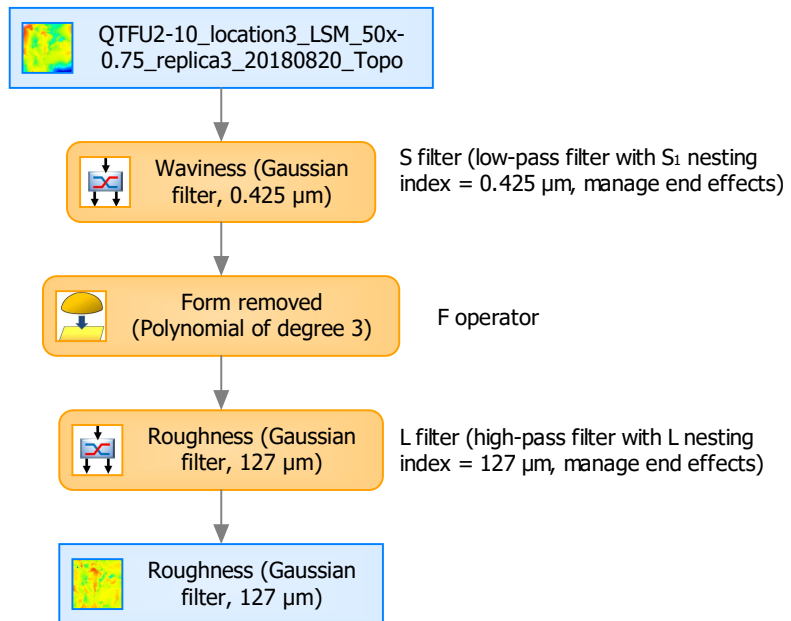

**Quartzite QTFU2-10**  
**50x objective, NA = 0.75 or 0.95**

| Identity card - QTFU2-10_location3_LSM_5... |                                                |        |  |
|---------------------------------------------|------------------------------------------------|--------|--|
| Name:                                       | QTFU2-10_location3_LSM_50x-0.95_replica1_20... |        |  |
| Created on:                                 | 8/20/2018 1:39:43 PM                           |        |  |
| <b>Axis: X</b>                              |                                                |        |  |
| Length:                                     | 255                                            | μm     |  |
| Size:                                       | 3000                                           | points |  |
| Spacing:                                    | 85.2                                           | nm     |  |
| <b>Axis: Y</b>                              |                                                |        |  |
| Length:                                     | 255                                            | μm     |  |
| Size:                                       | 3000                                           | points |  |
| Spacing:                                    | 85.2                                           | nm     |  |
| <b>Axis: Z</b>                              |                                                |        |  |
| Length:                                     | 60.2                                           | μm     |  |
| Size:                                       | 65532                                          | digits |  |
| Spacing:                                    | 0.919                                          | nm     |  |
| NMP ratio:                                  | 0.00 % (0 Pts)                                 |        |  |

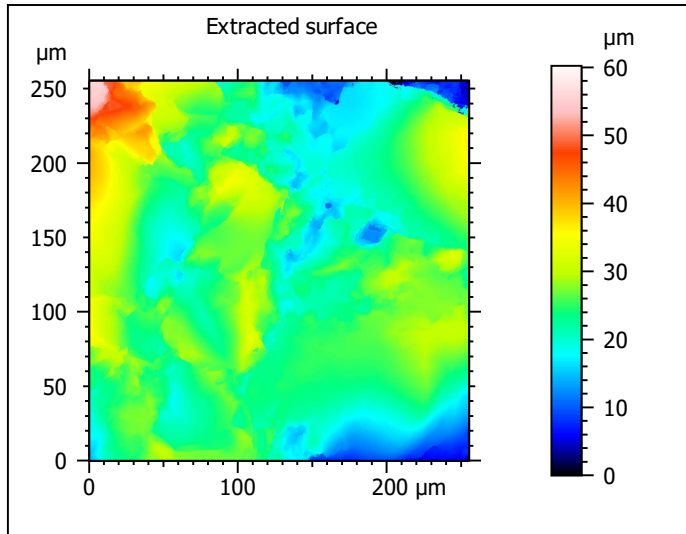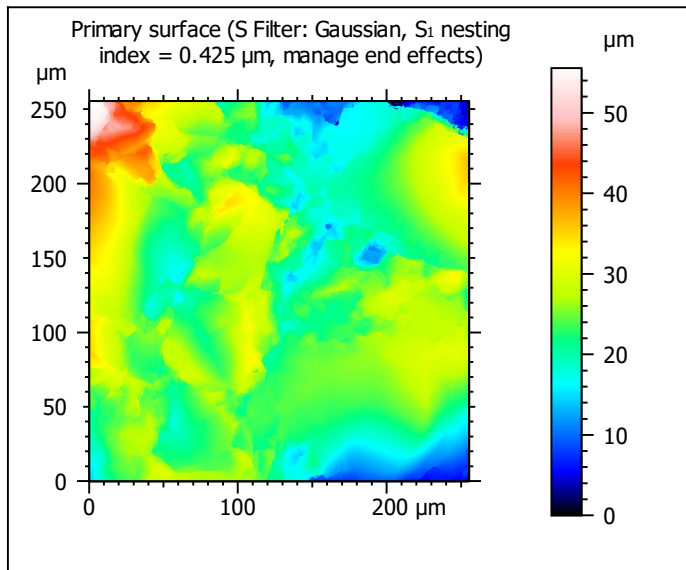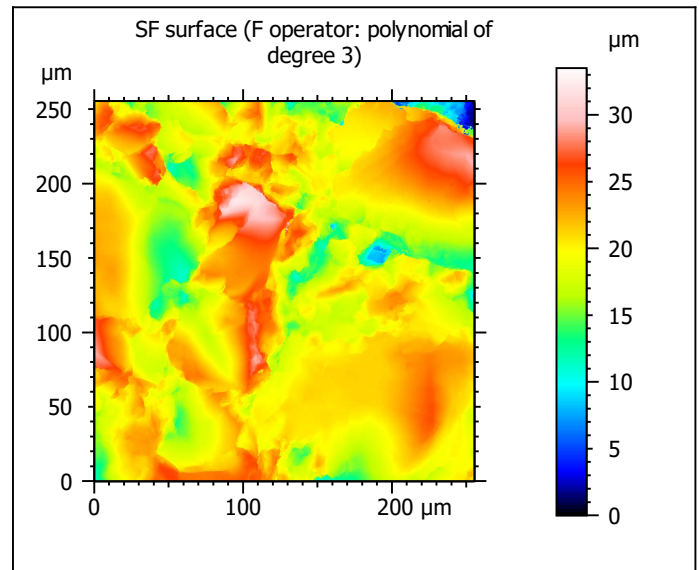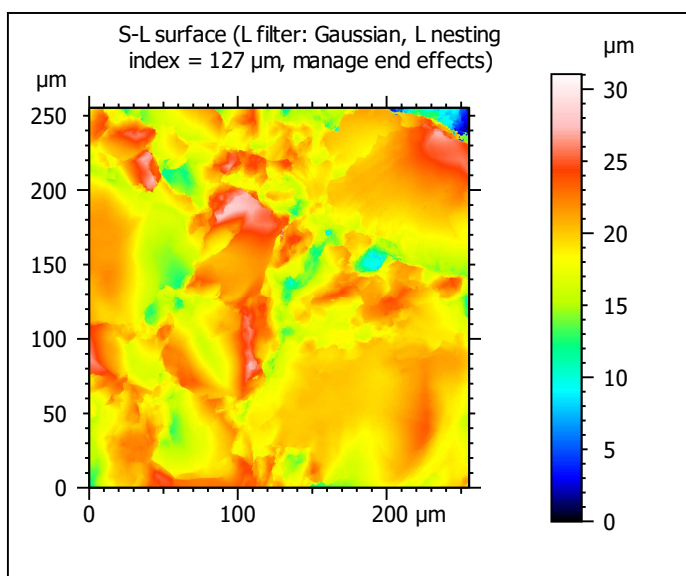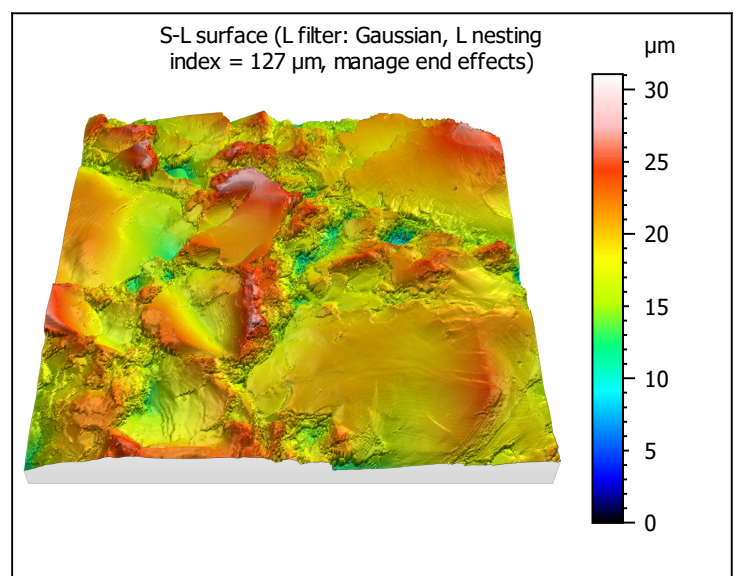

| ISO 25178                             |                                     |
|---------------------------------------|-------------------------------------|
| <b>Height Parameters</b>              |                                     |
| Sq                                    | 2.85 $\mu\text{m}$                  |
| Ssk                                   | -0.656                              |
| Sku                                   | 6.21                                |
| Sp                                    | 11.7 $\mu\text{m}$                  |
| Sv                                    | 19.3 $\mu\text{m}$                  |
| Sz                                    | 31.1 $\mu\text{m}$                  |
| Sa                                    | 2.10 $\mu\text{m}$                  |
| <b>Functional Parameters</b>          |                                     |
| Smr                                   | 0.000256 %                          |
| Smc                                   | 3.32 $\mu\text{m}$                  |
| Sxp                                   | 5.95 $\mu\text{m}$                  |
| <b>Spatial Parameters</b>             |                                     |
| Sal                                   | 15.0 $\mu\text{m}$                  |
| Str                                   | 0.740                               |
| Std                                   | 73.0 $^\circ$                       |
| <b>Hybrid Parameters</b>              |                                     |
| Sdq                                   | 2.09                                |
| Sdr                                   | 39.0 %                              |
| <b>Functional Parameters (Vol...)</b> |                                     |
| Vm                                    | 0.155 $\mu\text{m}^3/\mu\text{m}^2$ |
| Vv                                    | 3.48 $\mu\text{m}^3/\mu\text{m}^2$  |
| Vmp                                   | 0.155 $\mu\text{m}^3/\mu\text{m}^2$ |
| Vmc                                   | 2.26 $\mu\text{m}^3/\mu\text{m}^2$  |
| Vvc                                   | 3.08 $\mu\text{m}^3/\mu\text{m}^2$  |
| Vvv                                   | 0.396 $\mu\text{m}^3/\mu\text{m}^2$ |
| <b>Functional Parameters (Str...)</b> |                                     |
| Sk                                    | 3.61 $\mu\text{m}$                  |
| Spk                                   | 2.66 $\mu\text{m}$                  |
| Svk                                   | 3.08 $\mu\text{m}$                  |
| Smr1                                  | 14.9 %                              |
| Smr2                                  | 84.3 %                              |
| Spq                                   | *****                               |
| Svq                                   | *****                               |
| Smq                                   | *****                               |

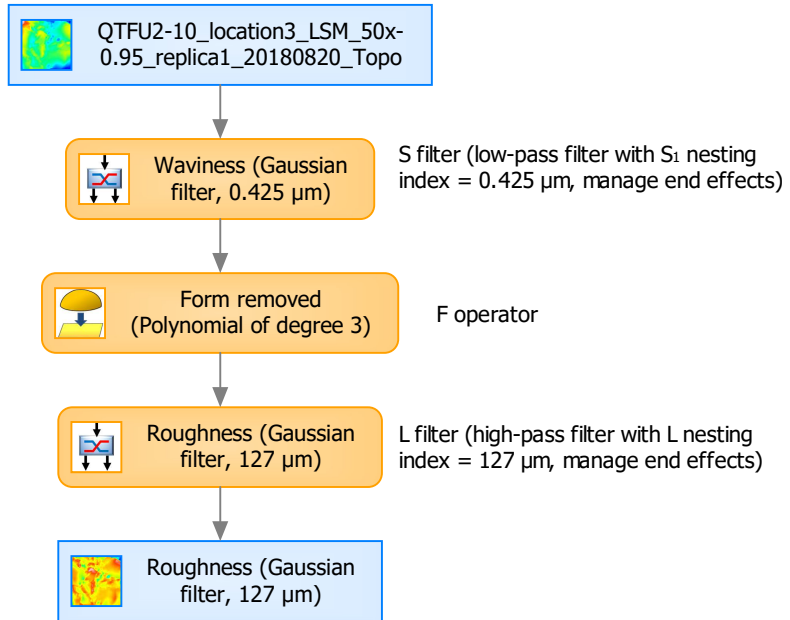

**Quartzite QTFU2-10**  
**50x objective, NA = 0.75 or 0.95**

| Identity card - QTFU2-10_location3_LSM_5... |                                                |        |  |
|---------------------------------------------|------------------------------------------------|--------|--|
| Name:                                       | QTFU2-10_location3_LSM_50x-0.95_replica2_20... |        |  |
| Created on:                                 | 8/20/2018 2:23:07 PM                           |        |  |
| <b>Axis: X</b>                              |                                                |        |  |
| Length:                                     | 255                                            | μm     |  |
| Size:                                       | 3000                                           | points |  |
| Spacing:                                    | 85.2                                           | nm     |  |
| <b>Axis: Y</b>                              |                                                |        |  |
| Length:                                     | 255                                            | μm     |  |
| Size:                                       | 3000                                           | points |  |
| Spacing:                                    | 85.2                                           | nm     |  |
| <b>Axis: Z</b>                              |                                                |        |  |
| Length:                                     | 70.7                                           | μm     |  |
| Size:                                       | 65532                                          | digits |  |
| Spacing:                                    | 1.08                                           | nm     |  |
| NMP ratio:                                  | 0.00 % (0 Pts)                                 |        |  |

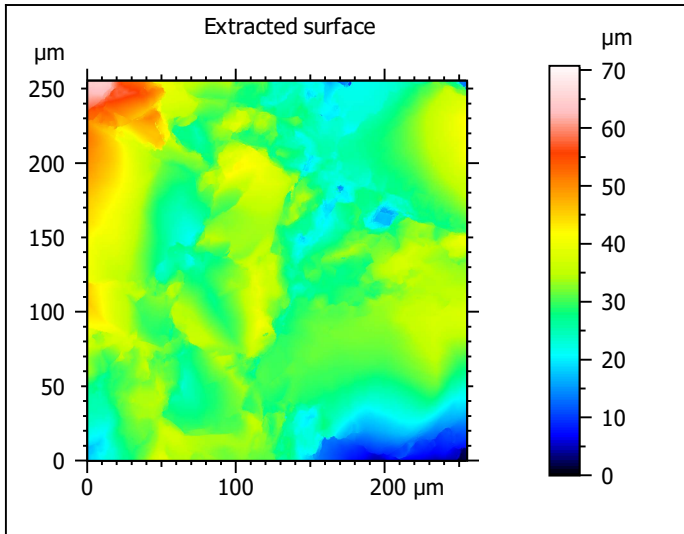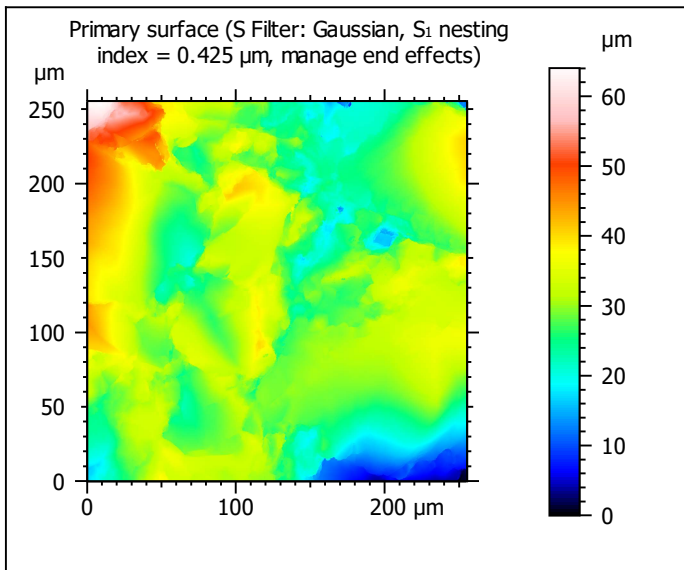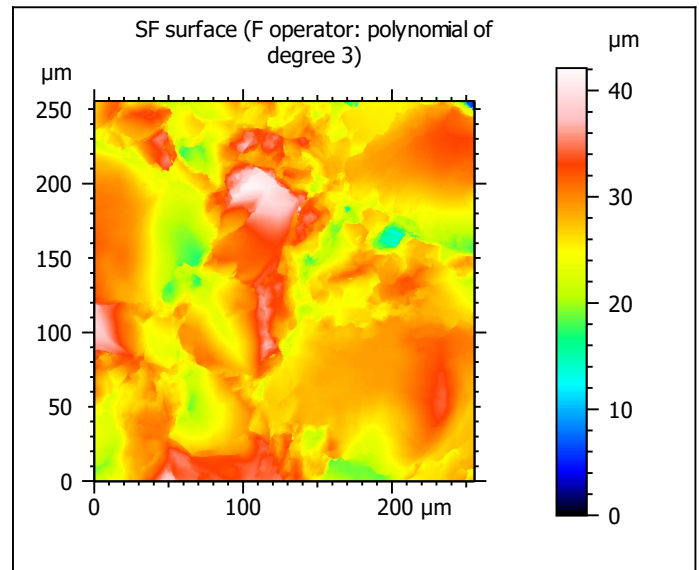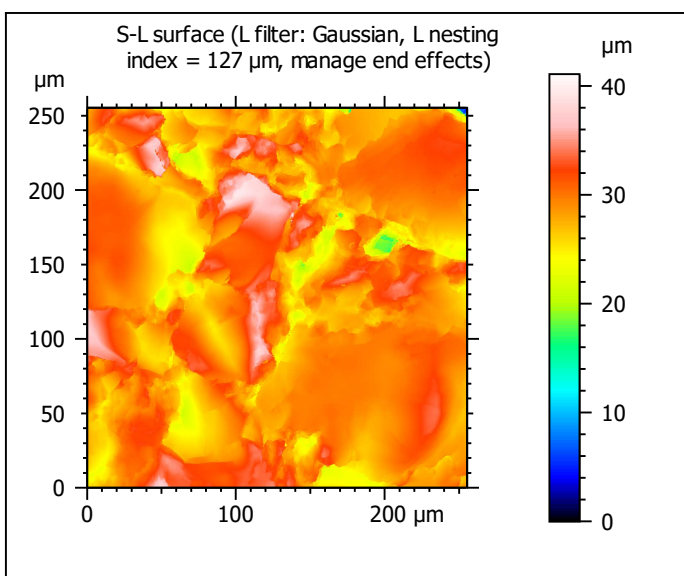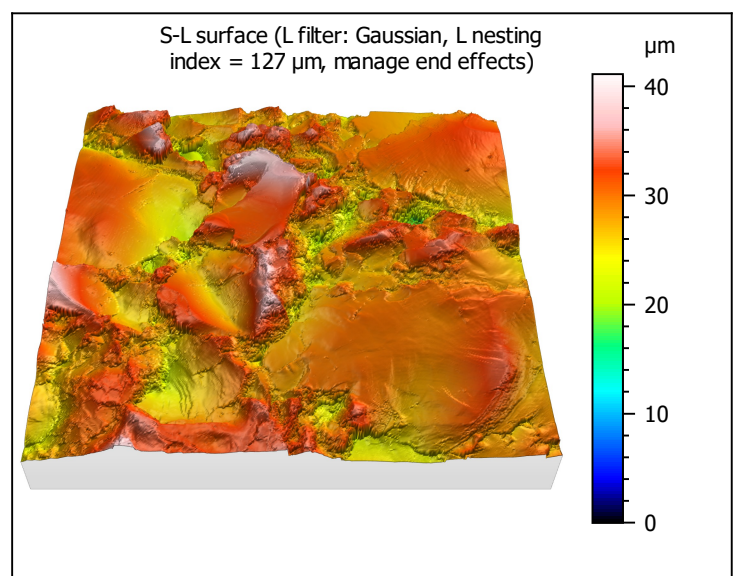

| ISO 25178                             |                                     |
|---------------------------------------|-------------------------------------|
| <b>Height Parameters</b>              |                                     |
| Sq                                    | 2.91 $\mu\text{m}$                  |
| Ssk                                   | -0.25                               |
| Sku                                   | 5.22                                |
| Sp                                    | 12.0 $\mu\text{m}$                  |
| Sv                                    | 29.2 $\mu\text{m}$                  |
| Sz                                    | 41.1 $\mu\text{m}$                  |
| Sa                                    | 2.22 $\mu\text{m}$                  |
| <b>Functional Parameters</b>          |                                     |
| Smr                                   | 0.000137 %                          |
| Smc                                   | 3.35 $\mu\text{m}$                  |
| Sxp                                   | 6.02 $\mu\text{m}$                  |
| <b>Spatial Parameters</b>             |                                     |
| Sal                                   | 16.7 $\mu\text{m}$                  |
| Str                                   | 0.645                               |
| Std                                   | 51.5 $^{\circ}$                     |
| <b>Hybrid Parameters</b>              |                                     |
| Sdq                                   | 1.91                                |
| Sdr                                   | 40.7 %                              |
| <b>Functional Parameters (Vol...)</b> |                                     |
| Vm                                    | 0.176 $\mu\text{m}^3/\mu\text{m}^2$ |
| Vv                                    | 3.52 $\mu\text{m}^3/\mu\text{m}^2$  |
| Vmp                                   | 0.176 $\mu\text{m}^3/\mu\text{m}^2$ |
| Vmc                                   | 2.42 $\mu\text{m}^3/\mu\text{m}^2$  |
| Vvc                                   | 3.15 $\mu\text{m}^3/\mu\text{m}^2$  |
| Vvv                                   | 0.372 $\mu\text{m}^3/\mu\text{m}^2$ |
| <b>Functional Parameters (Str...)</b> |                                     |
| Sk                                    | 3.92 $\mu\text{m}$                  |
| Spk                                   | 2.73 $\mu\text{m}$                  |
| Svk                                   | 2.83 $\mu\text{m}$                  |
| Smr1                                  | 13.0 %                              |
| Smr2                                  | 84.0 %                              |
| Spq                                   | *****                               |
| Svq                                   | *****                               |
| Smq                                   | *****                               |

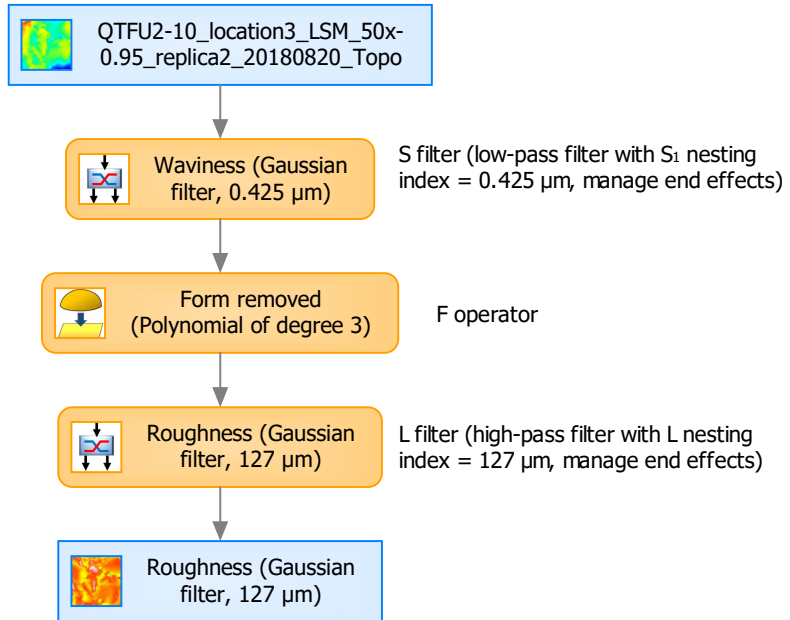

**Quartzite QTFU2-10**  
**50x objective, NA = 0.75 or 0.95**

| Identity card - QTFU2-10_location3_LSM_5... |                                                |        |  |
|---------------------------------------------|------------------------------------------------|--------|--|
| Name:                                       | QTFU2-10_location3_LSM_50x-0.95_replica3_20... |        |  |
| Created on:                                 | 8/20/2018 3:06:11 PM                           |        |  |
| <b>Axis: X</b>                              |                                                |        |  |
| Length:                                     | 255                                            | μm     |  |
| Size:                                       | 3000                                           | points |  |
| Spacing:                                    | 85.2                                           | nm     |  |
| <b>Axis: Y</b>                              |                                                |        |  |
| Length:                                     | 255                                            | μm     |  |
| Size:                                       | 3000                                           | points |  |
| Spacing:                                    | 85.2                                           | nm     |  |
| <b>Axis: Z</b>                              |                                                |        |  |
| Length:                                     | 66.9                                           | μm     |  |
| Size:                                       | 65532                                          | digits |  |
| Spacing:                                    | 1.02                                           | nm     |  |
| NMP ratio:                                  | 0.00 % (0 Pts)                                 |        |  |

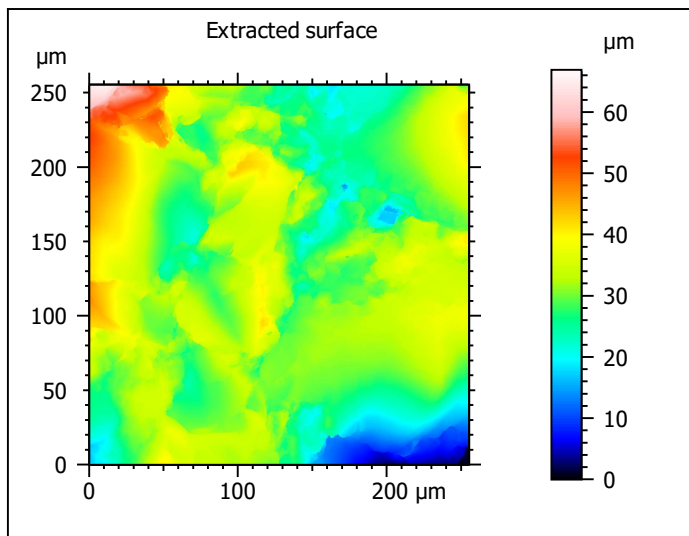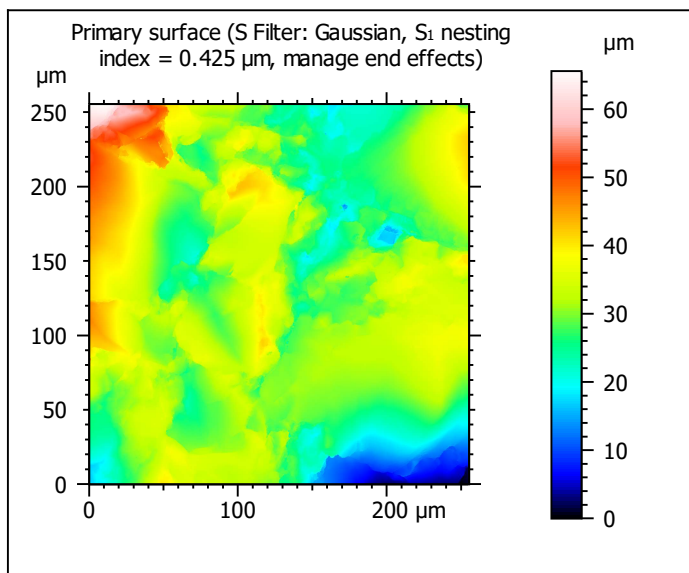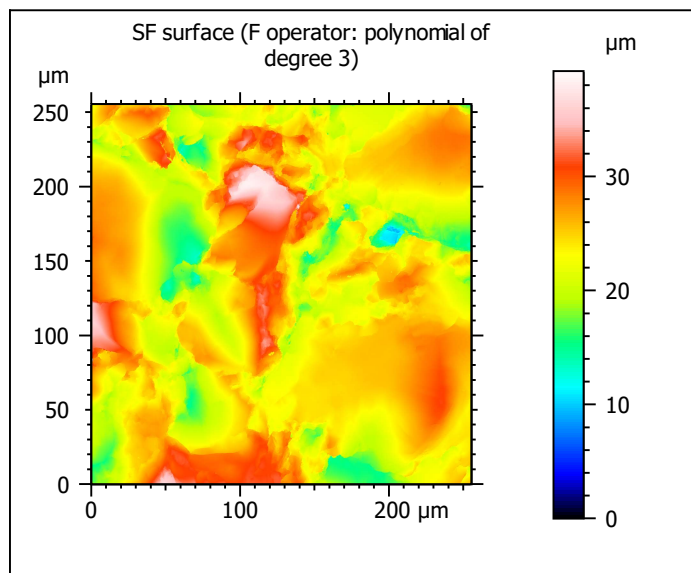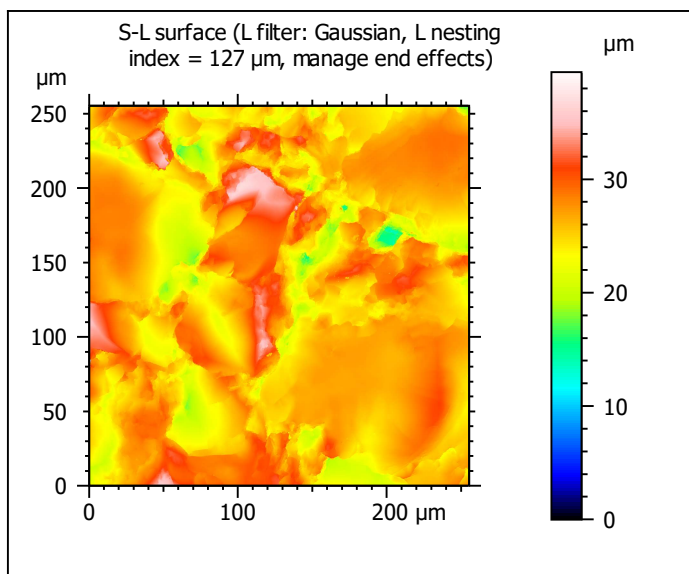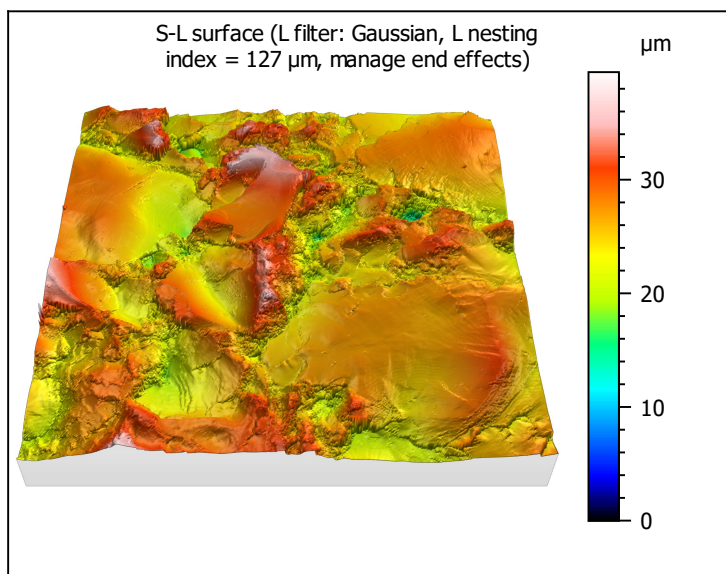



| ISO 25178                             |                                     |
|---------------------------------------|-------------------------------------|
| <b>Height Parameters</b>              |                                     |
| Sq                                    | 2.94 $\mu\text{m}$                  |
| Ssk                                   | -0.0327                             |
| Sku                                   | 3.88                                |
| Sp                                    | 13.2 $\mu\text{m}$                  |
| Sv                                    | 26.2 $\mu\text{m}$                  |
| Sz                                    | 39.5 $\mu\text{m}$                  |
| Sa                                    | 2.27 $\mu\text{m}$                  |
| <b>Functional Parameters</b>          |                                     |
| Smr                                   | 0.00224 %                           |
| Smc                                   | 3.42 $\mu\text{m}$                  |
| Sxp                                   | 6.10 $\mu\text{m}$                  |
| <b>Spatial Parameters</b>             |                                     |
| Sal                                   | 17.0 $\mu\text{m}$                  |
| Str                                   | 0.595                               |
| Std                                   | 51.5 $^\circ$                       |
| <b>Hybrid Parameters</b>              |                                     |
| Sdq                                   | 1.89                                |
| Sdr                                   | 41.1 %                              |
| <b>Functional Parameters (Vol...)</b> |                                     |
| Vm                                    | 0.183 $\mu\text{m}^3/\mu\text{m}^2$ |
| Vv                                    | 3.61 $\mu\text{m}^3/\mu\text{m}^2$  |
| Vmp                                   | 0.183 $\mu\text{m}^3/\mu\text{m}^2$ |
| Vmc                                   | 2.51 $\mu\text{m}^3/\mu\text{m}^2$  |
| Vvc                                   | 3.24 $\mu\text{m}^3/\mu\text{m}^2$  |
| Vvv                                   | 0.365 $\mu\text{m}^3/\mu\text{m}^2$ |
| <b>Functional Parameters (Str...)</b> |                                     |
| Sk                                    | 3.96 $\mu\text{m}$                  |
| Spk                                   | 2.85 $\mu\text{m}$                  |
| Svk                                   | 2.86 $\mu\text{m}$                  |
| Smr1                                  | 13.0 %                              |
| Smr2                                  | 84.0 %                              |
| Spq                                   | *****                               |
| Svq                                   | *****                               |
| Smq                                   | *****                               |

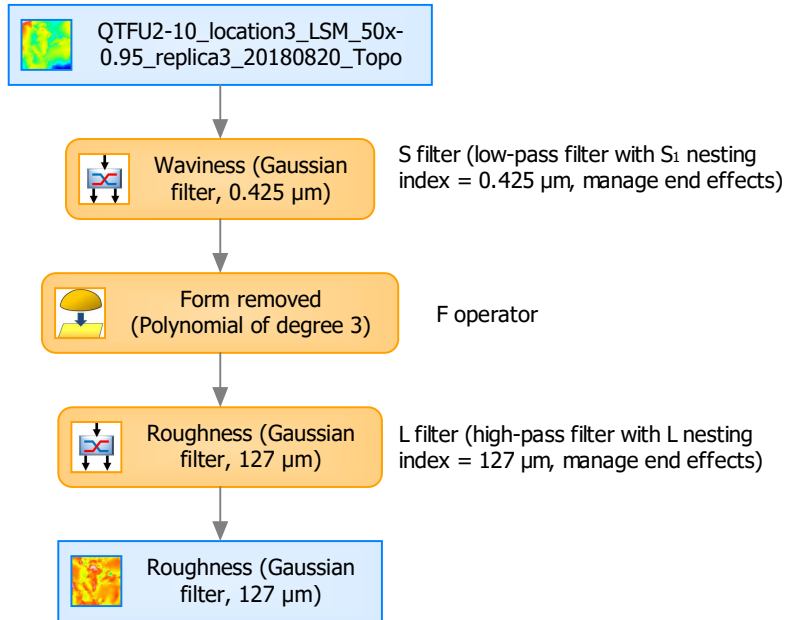

**Roughness standard  $Ra = 0.4 \mu\text{m}$   
50x objective, NA = 0.75 or 0.95, 4x1 tiles**

**Identity card - roughnessStandard0.4um\_locat...**

Name: roughnessStandard0.4um\_location1\_LSM\_50x-0.75\_...  
Created on: 8/15/2018 12:52:07 PM

**Axis: X**  
Length: 950  $\mu\text{m}$   
Size: 7617 points  
Spacing: 0.125  $\mu\text{m}$

**Axis: Y**  
Length: 258  $\mu\text{m}$   
Size: 2069 points  
Spacing: 0.125  $\mu\text{m}$

**Axis: Z**  
Length: 12.1  $\mu\text{m}$   
Size: 65532 digits  
Spacing: 0.185 nm  
NMP ratio: 0.989 % (155932 Pts)

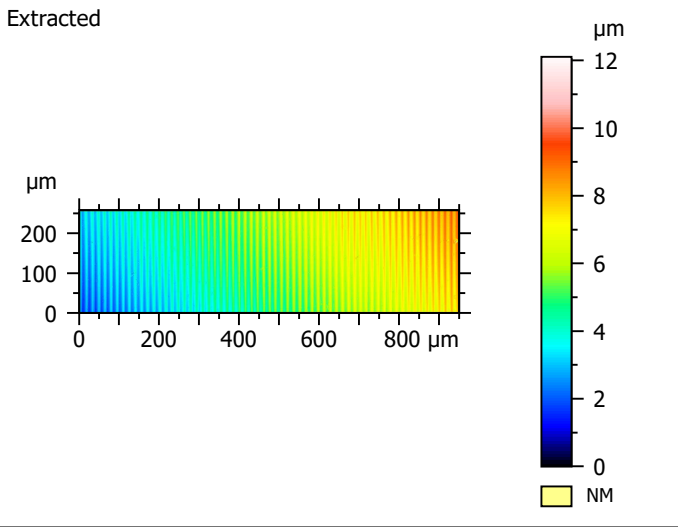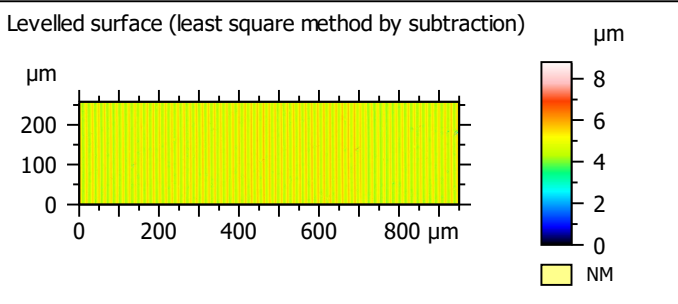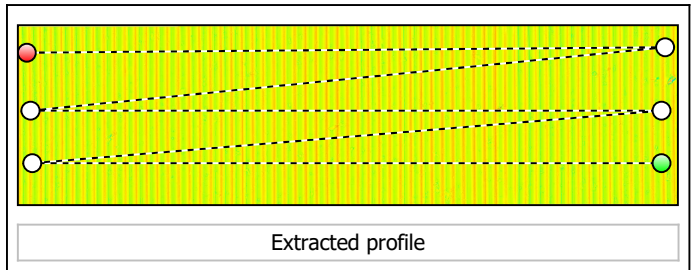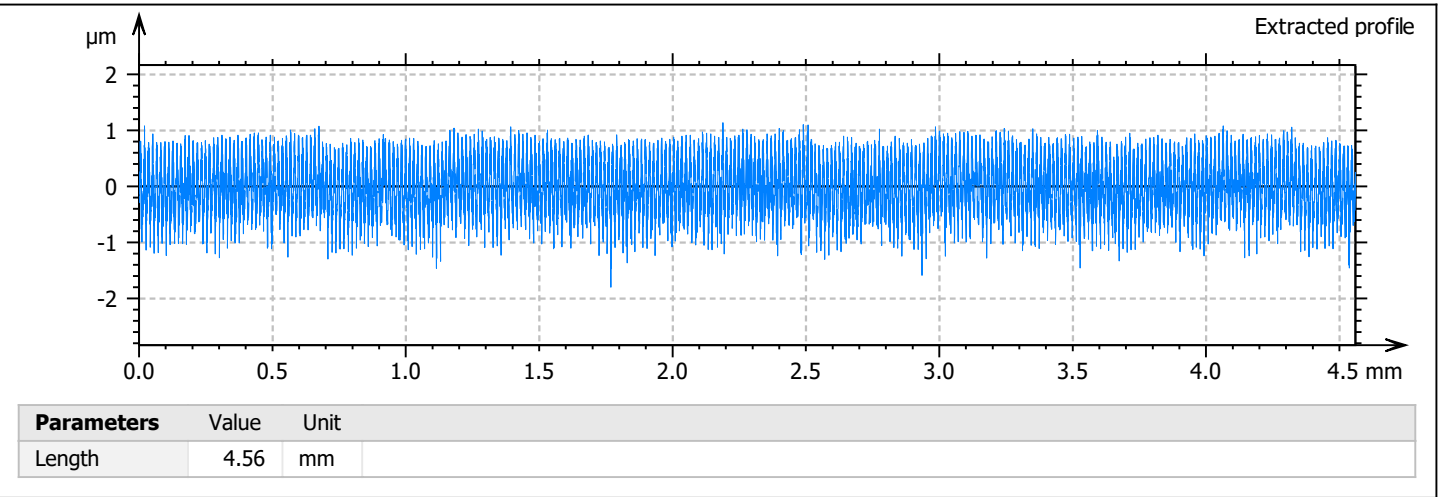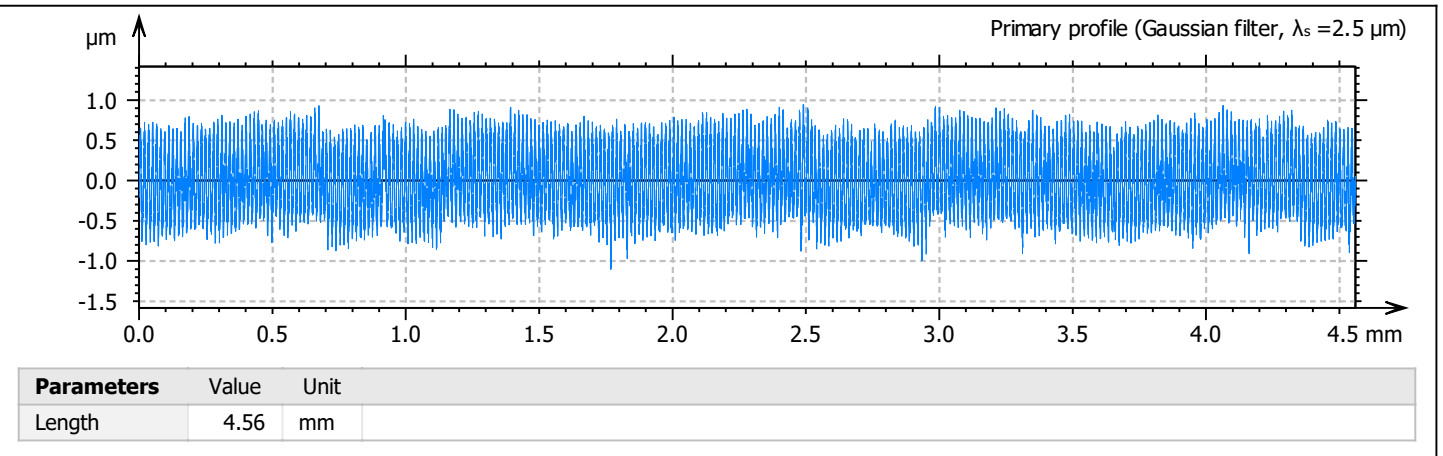

## ISO 4287

### Amplitude parameters - Roughness profile

|    |       |    |                         |                                                     |
|----|-------|----|-------------------------|-----------------------------------------------------|
| Ra | 0.396 | μm | Gaussian filter, 0.8 mm | Arithmetic mean deviation of the roughness profile. |
|----|-------|----|-------------------------|-----------------------------------------------------|

| Parameters                                               | Value | Unit | Tolerance                                                                                               |
|----------------------------------------------------------|-------|------|---------------------------------------------------------------------------------------------------------|
| Ra - Amplitude parameters - Roughness profile - ISO 4287 | 0.396 | μm   | 0.400 μm ± 0.050 μm  |

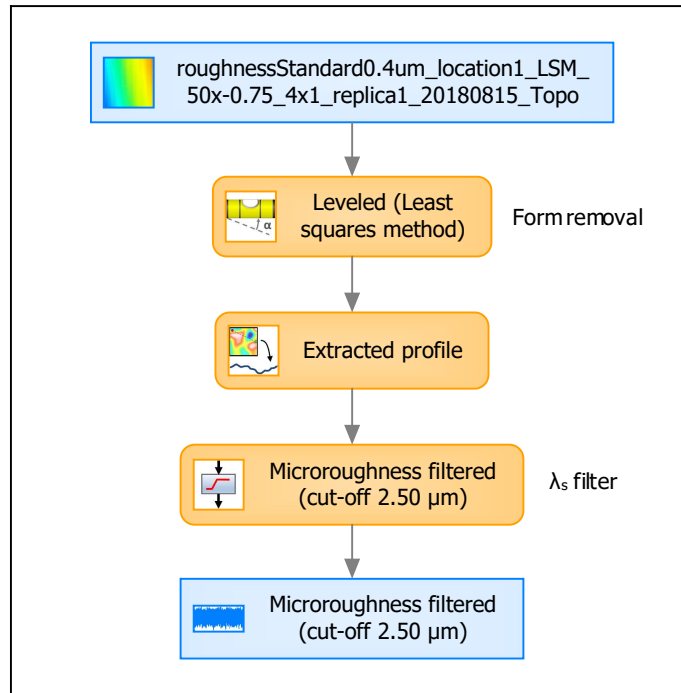

**Roughness standard  $Ra = 0.4 \mu\text{m}$   
50x objective, NA = 0.75 or 0.95, 4x1 tiles**

**Identity card - roughnessStandard0.4um\_locat...**

Name: roughnessStandard0.4um\_location1\_LSM\_50x-0.75\_...  
Created on: 8/15/2018 1:11:25 PM

**Axis: X**  
Length: 950  $\mu\text{m}$   
Size: 7617 points  
Spacing: 0.125  $\mu\text{m}$

**Axis: Y**  
Length: 258  $\mu\text{m}$   
Size: 2069 points  
Spacing: 0.125  $\mu\text{m}$

**Axis: Z**  
Length: 11.9  $\mu\text{m}$   
Size: 65532 digits  
Spacing: 0.181 nm  
NMP ratio: 0.989 % (155932 Pts)

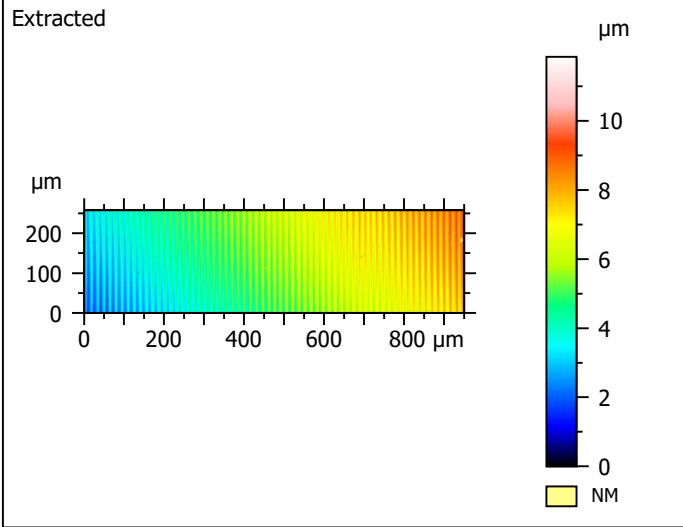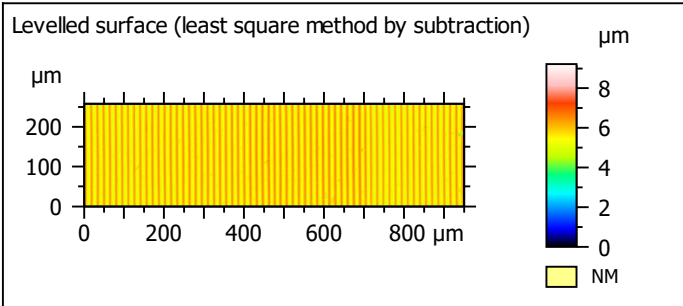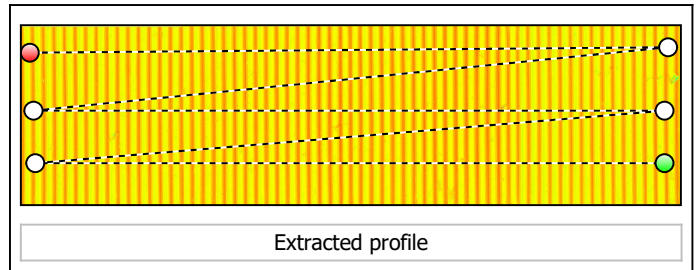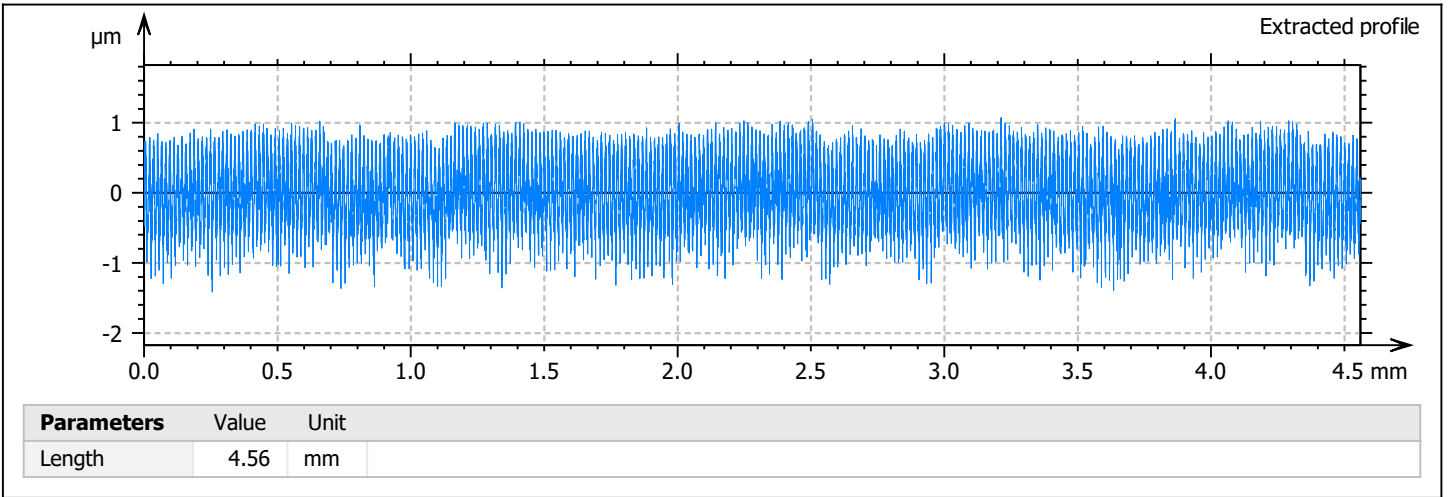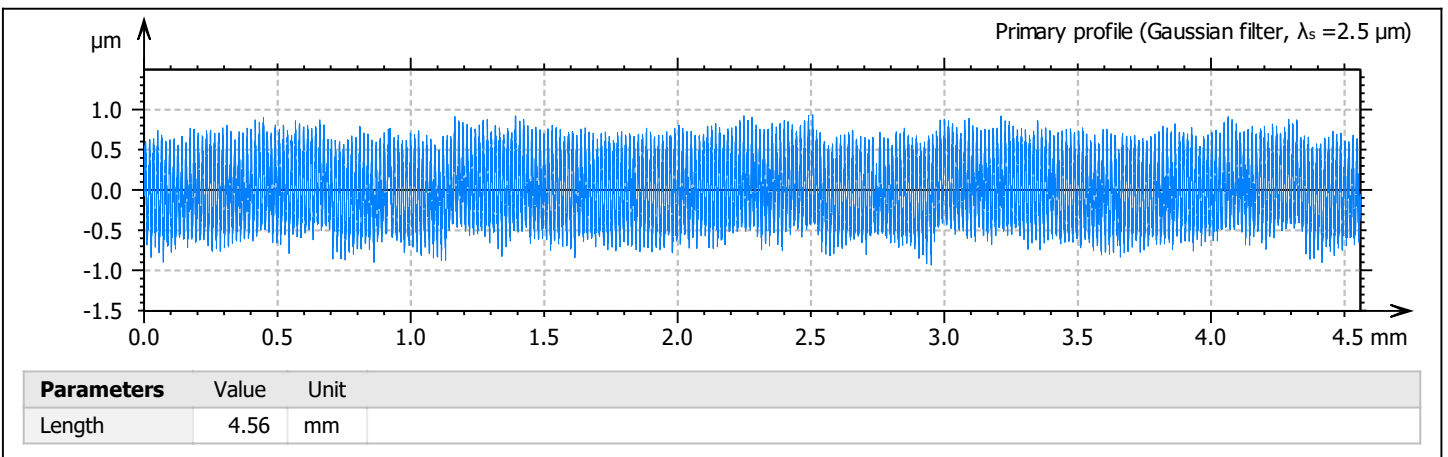

# ISO 4287

## Amplitude parameters - Roughness profile

|    |       |    |                         |                                                     |
|----|-------|----|-------------------------|-----------------------------------------------------|
| Ra | 0.395 | µm | Gaussian filter, 0.8 mm | Arithmetic mean deviation of the roughness profile. |
|----|-------|----|-------------------------|-----------------------------------------------------|

| Parameters                                               | Value | Unit | Tolerance           |
|----------------------------------------------------------|-------|------|---------------------|
| Ra - Amplitude parameters - Roughness profile - ISO 4287 | 0.395 | µm   | 0.400 µm ± 0.050 µm |

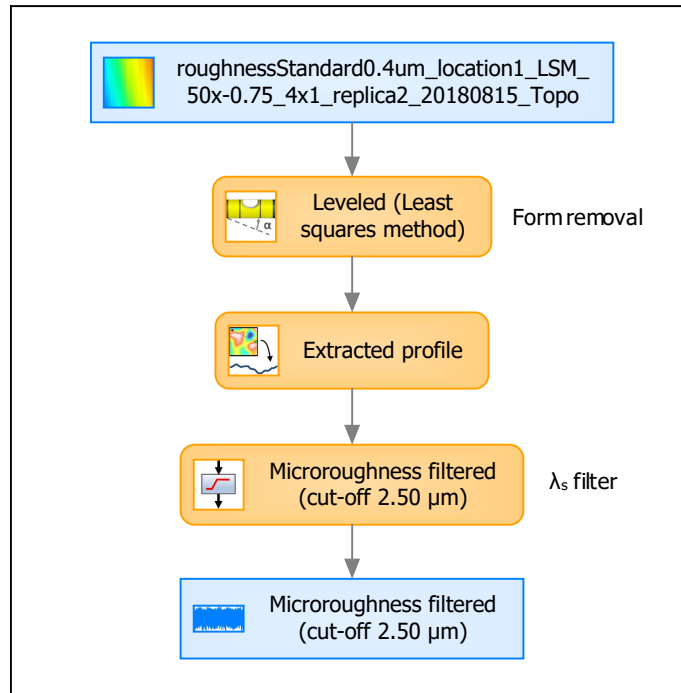

**Roughness standard  $Ra = 0.4 \mu\text{m}$   
50x objective, NA = 0.75 or 0.95, 4x1 tiles**

**Identity card - roughnessStandard0.4um\_locat...**

Name: roughnessStandard0.4um\_location1\_LSM\_50x-0.75\_...  
Created on: 8/15/2018 1:30:08 PM

**Axis: X**  
Length: 950  $\mu\text{m}$   
Size: 7617 points  
Spacing: 0.125  $\mu\text{m}$

**Axis: Y**  
Length: 258  $\mu\text{m}$   
Size: 2069 points  
Spacing: 0.125  $\mu\text{m}$

**Axis: Z**  
Length: 12.4  $\mu\text{m}$   
Size: 65532 digits  
Spacing: 0.189 nm  
NMP ratio: 0.989 % (155932 Pts)

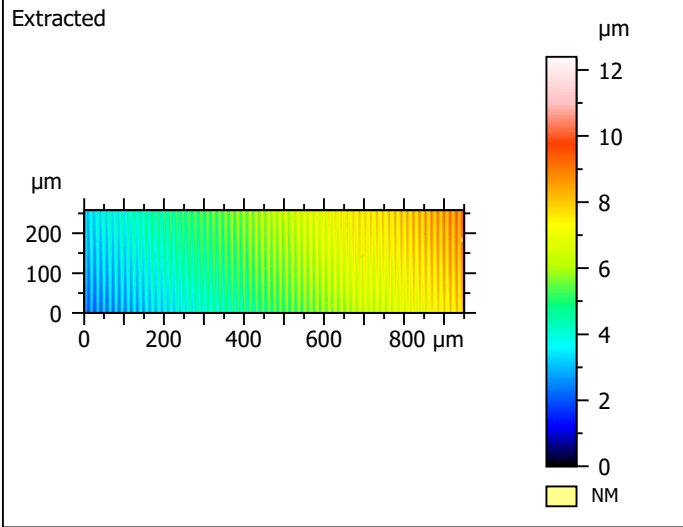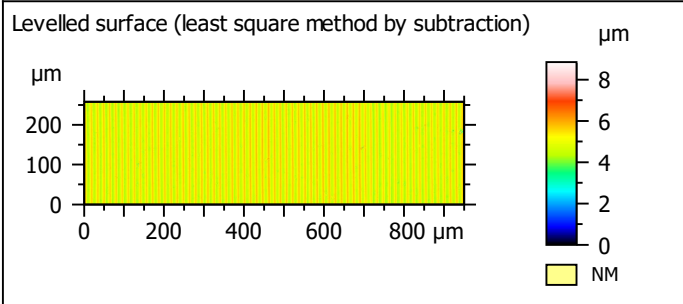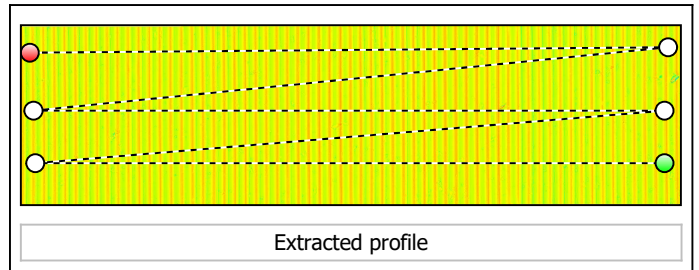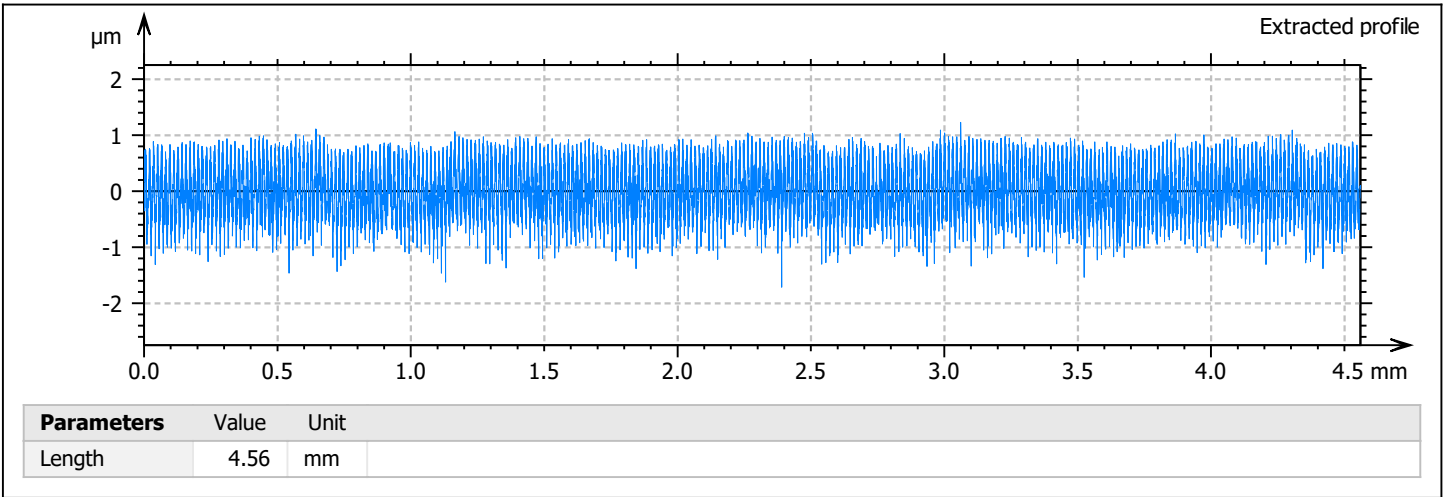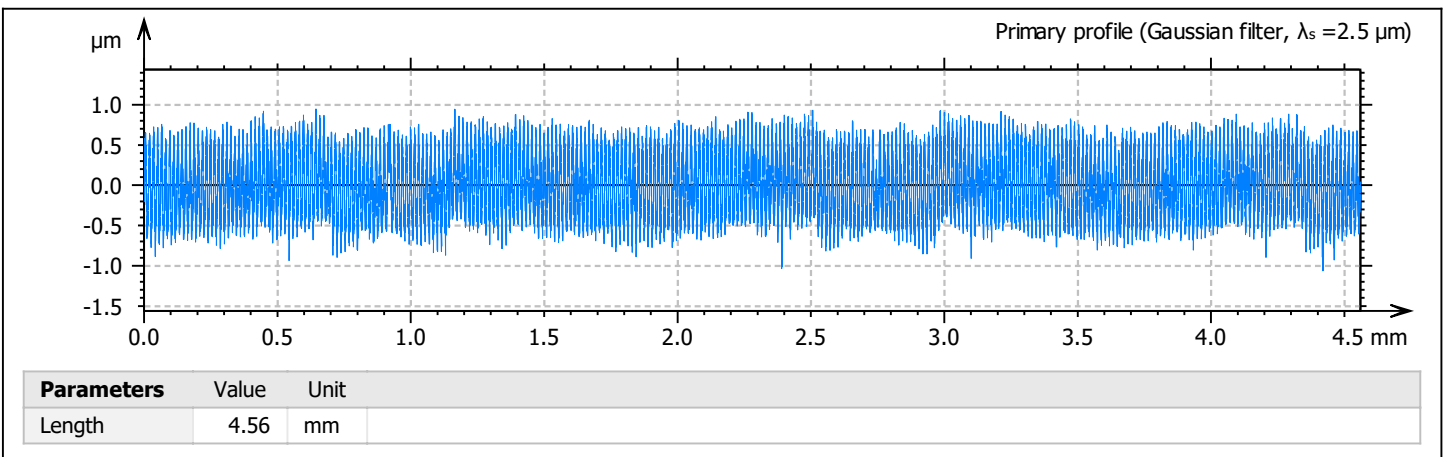

## ISO 4287

### Amplitude parameters - Roughness profile

|    |       |    |                         |                                                     |
|----|-------|----|-------------------------|-----------------------------------------------------|
| Ra | 0.396 | μm | Gaussian filter, 0.8 mm | Arithmetic mean deviation of the roughness profile. |
|----|-------|----|-------------------------|-----------------------------------------------------|

| Parameters                                               | Value | Unit | Tolerance                                                                                               |
|----------------------------------------------------------|-------|------|---------------------------------------------------------------------------------------------------------|
| Ra - Amplitude parameters - Roughness profile - ISO 4287 | 0.396 | μm   | 0.400 μm ± 0.050 μm  |

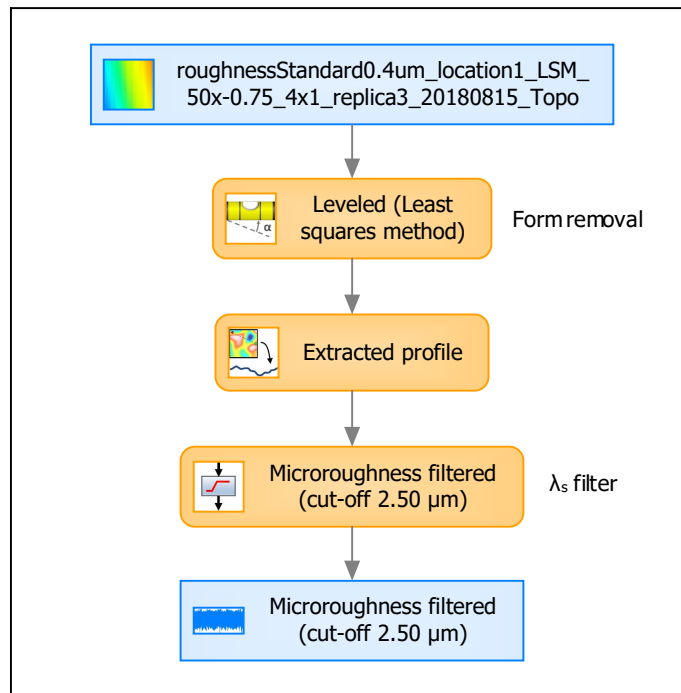

**Roughness standard  $Ra = 0.4 \mu\text{m}$   
50x objective, NA = 0.75 or 0.95, 4x1 tiles**

**Identity card - roughnessStandard0.4um\_locat...**

Name: roughnessStandard0.4um\_location1\_LSM\_50x-0.95\_...  
Created on: 8/15/2018 12:35:19 PM

**Axis: X**  
Length: 944  $\mu\text{m}$   
Size: 7569 points  
Spacing: 0.125  $\mu\text{m}$

**Axis: Y**  
Length: 258  $\mu\text{m}$   
Size: 2069 points  
Spacing: 0.125  $\mu\text{m}$

**Axis: Z**  
Length: 10.5  $\mu\text{m}$   
Size: 65531 digits  
Spacing: 0.160 nm  
NMP ratio: 0.987 % (154588 Pts)

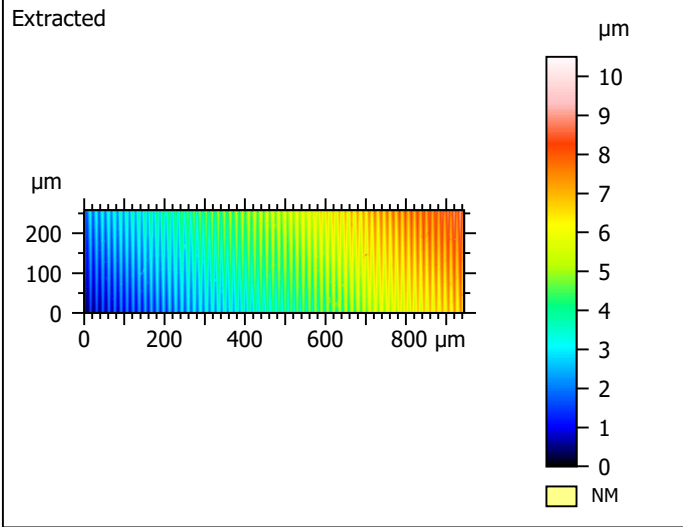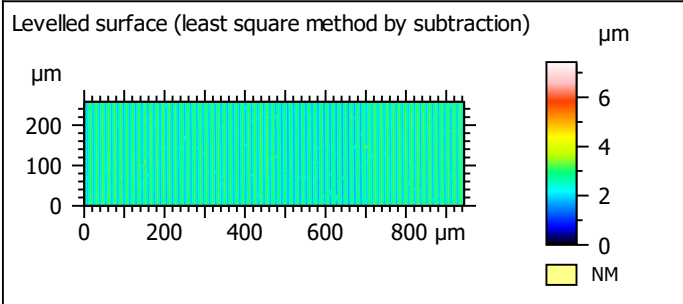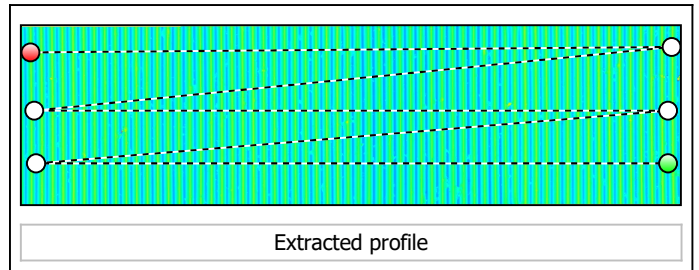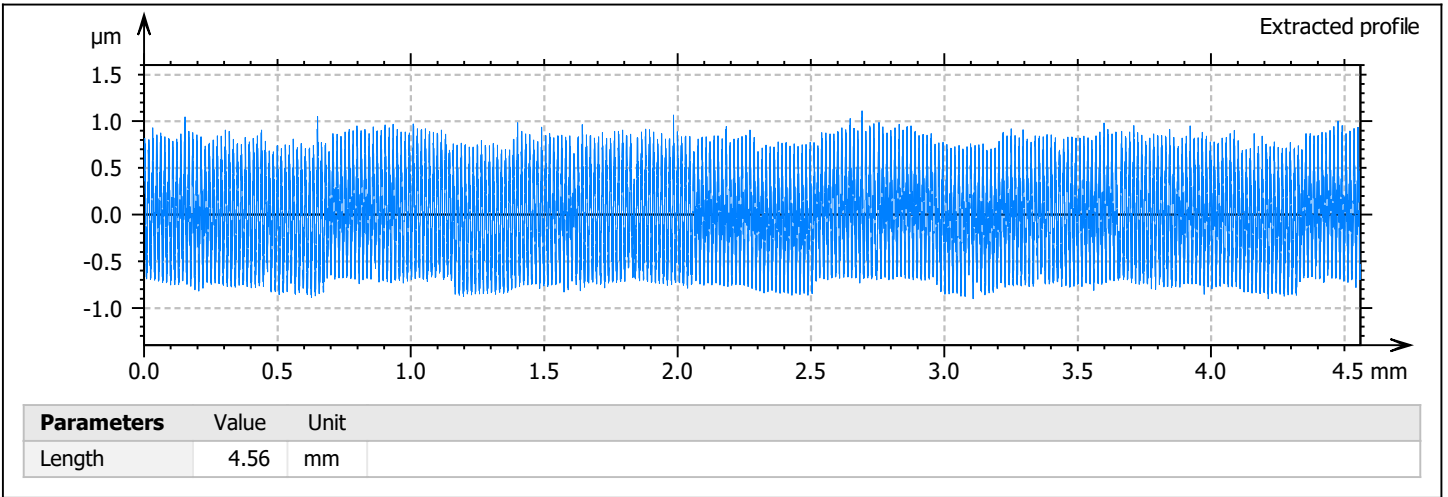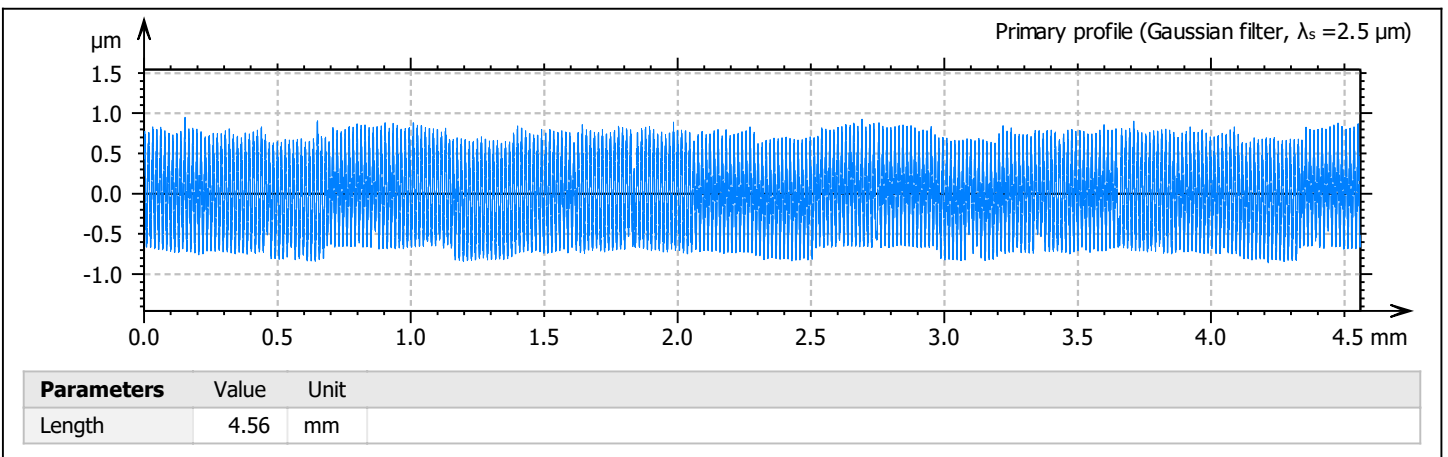



## ISO 4287

### Amplitude parameters - Roughness profile

|    |       |    |                         |                                                     |
|----|-------|----|-------------------------|-----------------------------------------------------|
| Ra | 0.418 | μm | Gaussian filter, 0.8 mm | Arithmetic mean deviation of the roughness profile. |
|----|-------|----|-------------------------|-----------------------------------------------------|

| Parameters                                               | Value | Unit | Tolerance                                                                                               |
|----------------------------------------------------------|-------|------|---------------------------------------------------------------------------------------------------------|
| Ra - Amplitude parameters - Roughness profile - ISO 4287 | 0.418 | μm   | 0.400 μm ± 0.050 μm  |

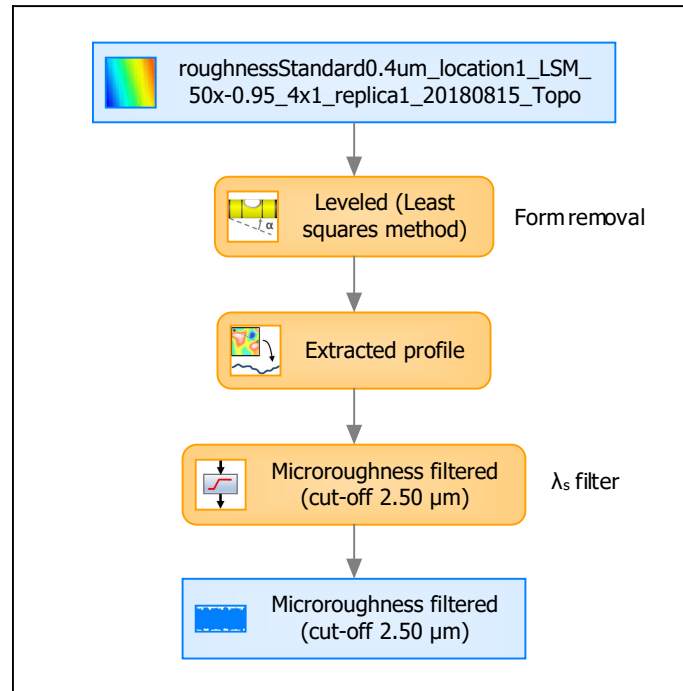

**Roughness standard  $Ra = 0.4 \mu\text{m}$   
50x objective, NA = 0.75 or 0.95, 4x1 tiles**

**Identity card - roughnessStandard0.4um\_locat...**

Name: roughnessStandard0.4um\_location1\_LSM\_50x-0.95\_...  
Created on: 8/15/2018 1:02:18 PM

**Axis: X**  
Length: 944  $\mu\text{m}$   
Size: 7569 points  
Spacing: 0.125  $\mu\text{m}$

**Axis: Y**  
Length: 258  $\mu\text{m}$   
Size: 2069 points  
Spacing: 0.125  $\mu\text{m}$

**Axis: Z**  
Length: 11.5  $\mu\text{m}$   
Size: 65532 digits  
Spacing: 0.176 nm  
NMP ratio: 0.987 % (154588 Pts)

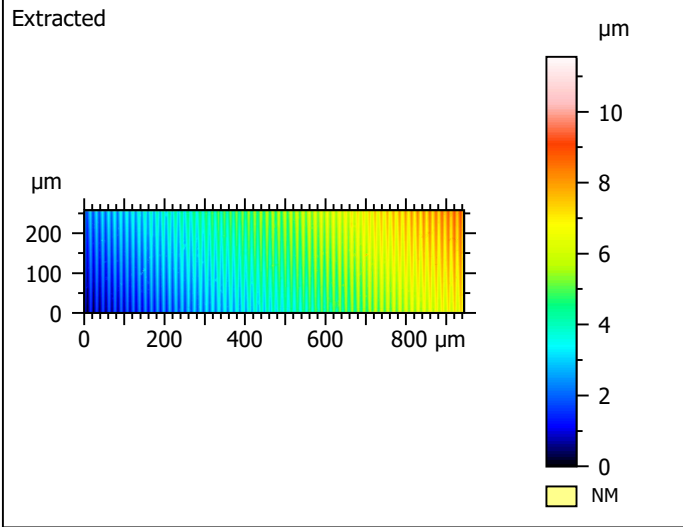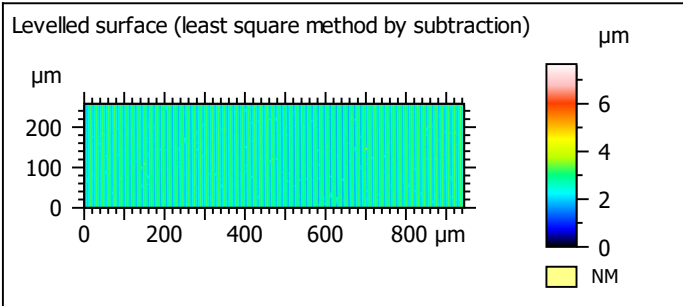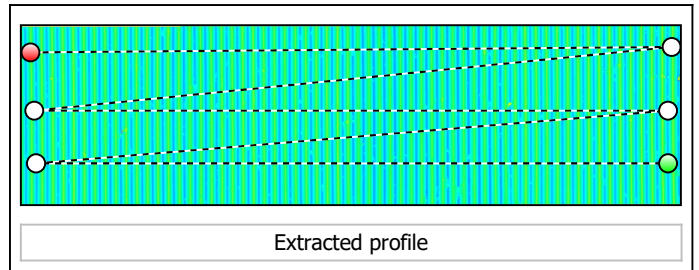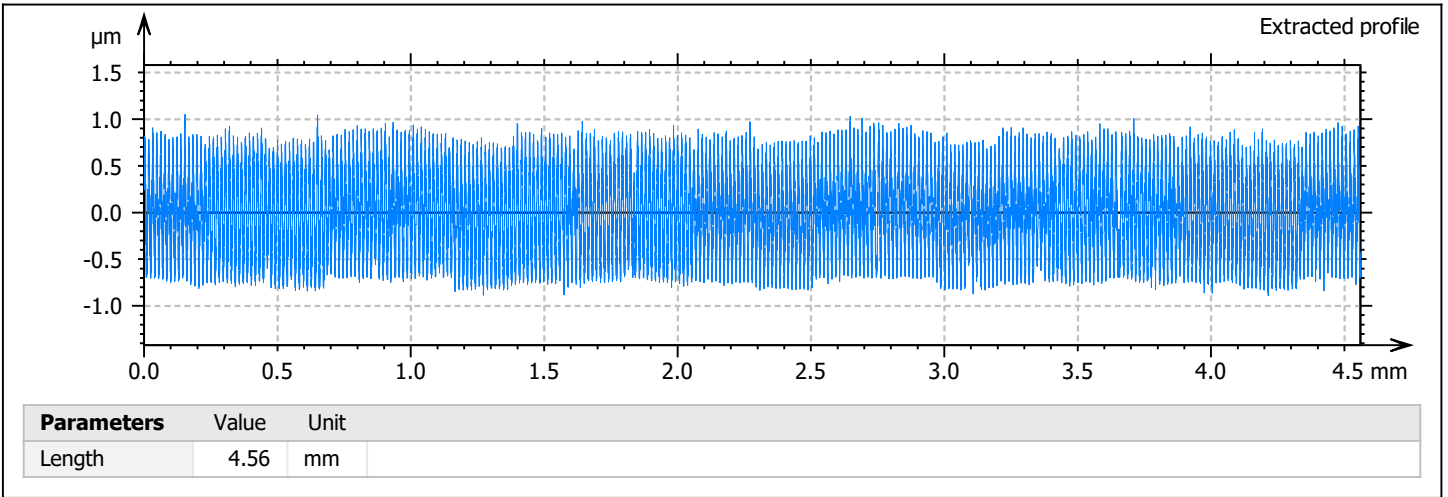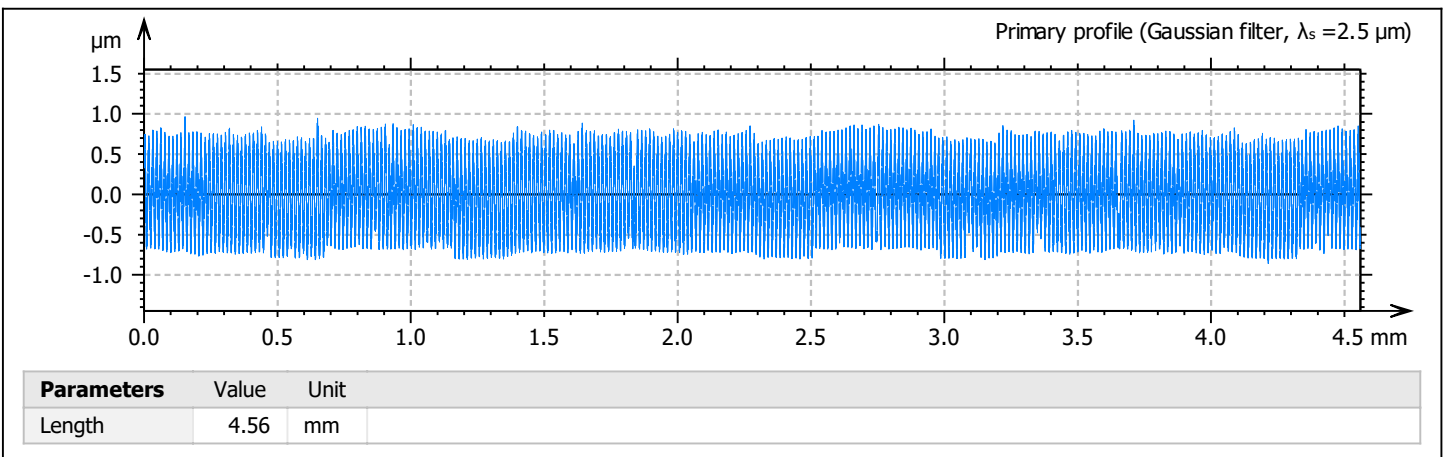

# ISO 4287

## Amplitude parameters - Roughness profile

|    |       |    |                         |                                                     |
|----|-------|----|-------------------------|-----------------------------------------------------|
| Ra | 0.415 | μm | Gaussian filter, 0.8 mm | Arithmetic mean deviation of the roughness profile. |
|----|-------|----|-------------------------|-----------------------------------------------------|

| Parameters                                               | Value | Unit | Tolerance           |
|----------------------------------------------------------|-------|------|---------------------|
| Ra - Amplitude parameters - Roughness profile - ISO 4287 | 0.415 | μm   | 0.400 μm ± 0.050 μm |

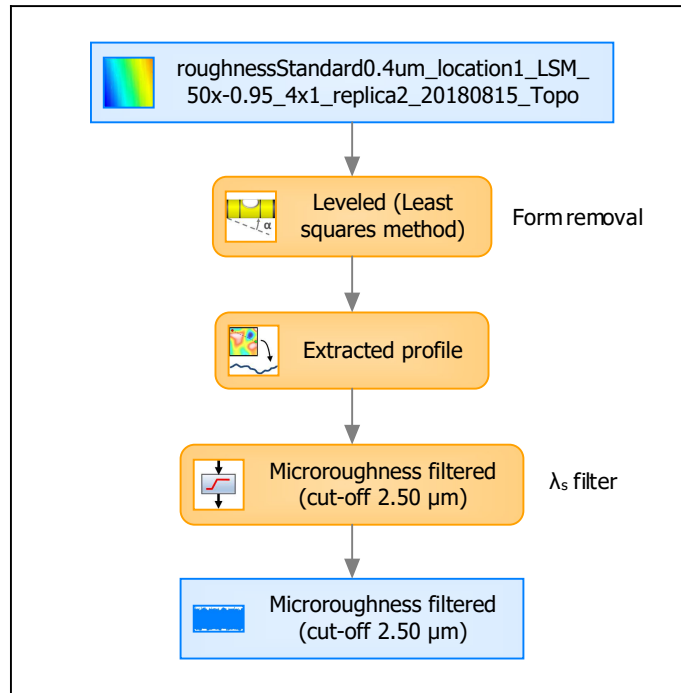

**Roughness standard  $Ra = 0.4 \mu\text{m}$   
50x objective, NA = 0.75 or 0.95, 4x1 tiles**

**Identity card - roughnessStandard0.4um\_locat...**

Name: roughnessStandard0.4um\_location1\_LSM\_50x-0.95\_...  
Created on: 8/15/2018 1:21:05 PM

**Axis: X**  
Length: 944  $\mu\text{m}$   
Size: 7569 points  
Spacing: 0.125  $\mu\text{m}$

**Axis: Y**  
Length: 258  $\mu\text{m}$   
Size: 2069 points  
Spacing: 0.125  $\mu\text{m}$

**Axis: Z**  
Length: 11.3  $\mu\text{m}$   
Size: 65531 digits  
Spacing: 0.173 nm  
NMP ratio: 0.987 % (154588 Pts)

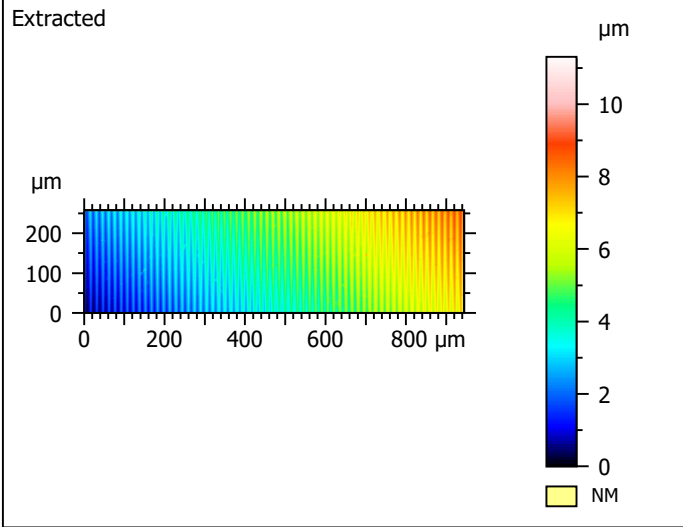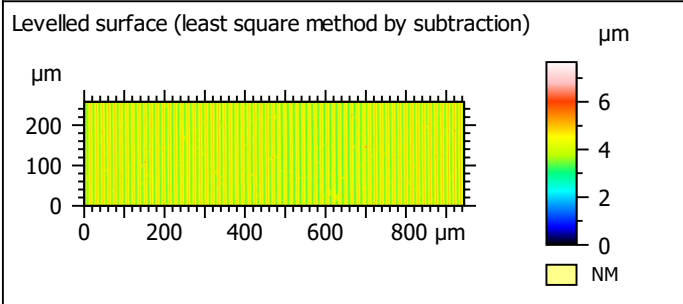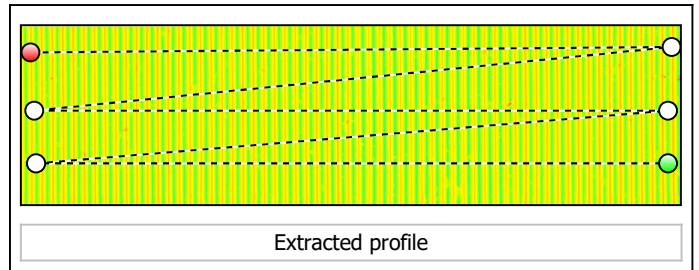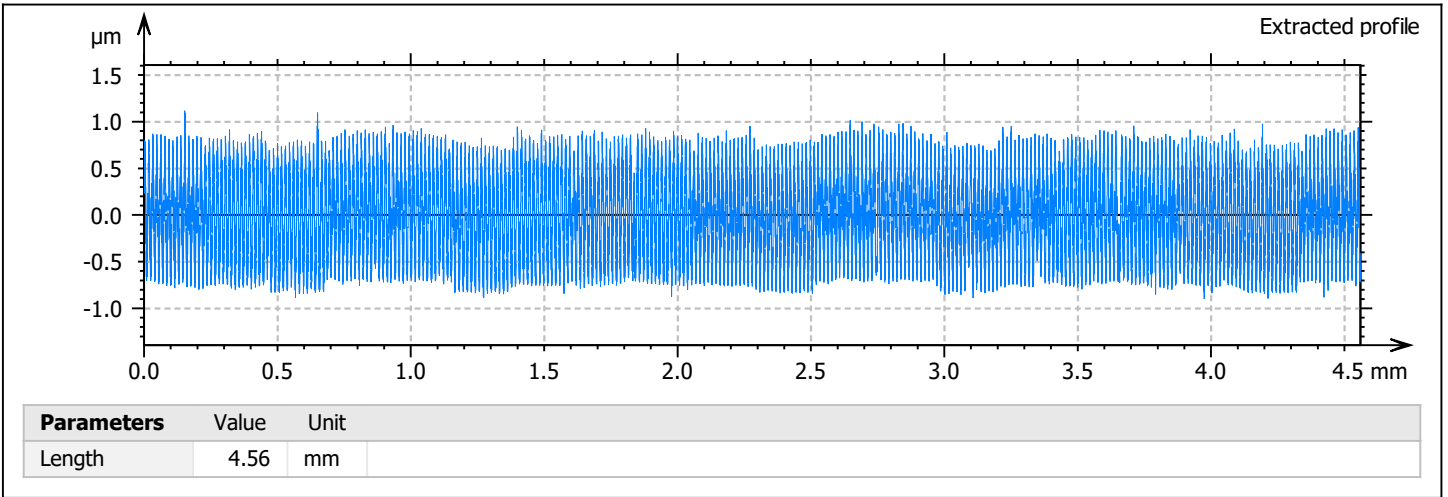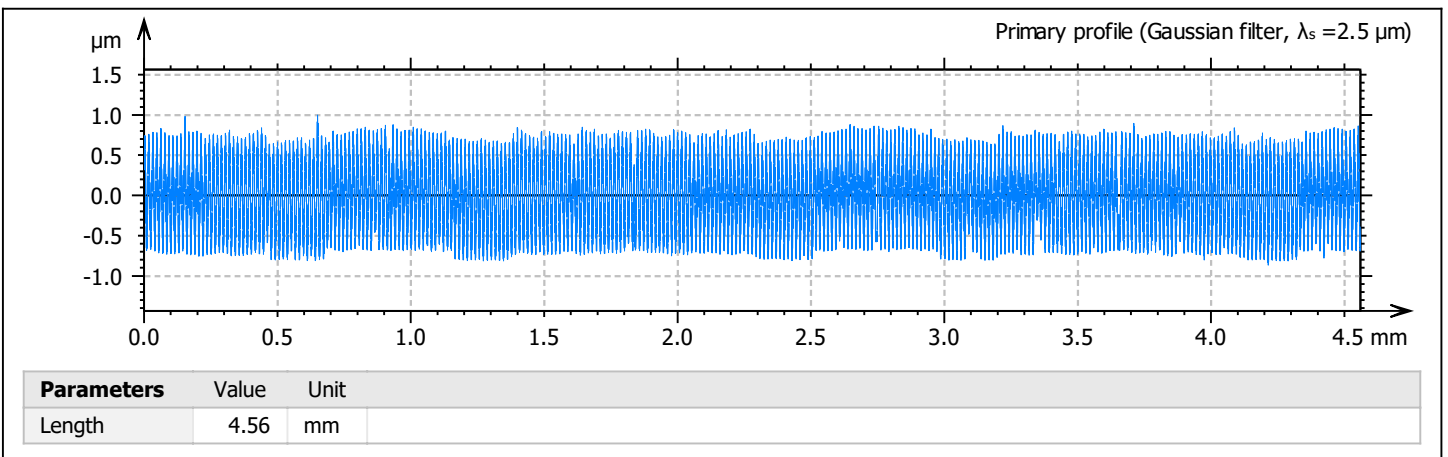

## ISO 4287

### Amplitude parameters - Roughness profile

|    |       |    |                         |                                                     |
|----|-------|----|-------------------------|-----------------------------------------------------|
| Ra | 0.417 | µm | Gaussian filter, 0.8 mm | Arithmetic mean deviation of the roughness profile. |
|----|-------|----|-------------------------|-----------------------------------------------------|

| Parameters                                               | Value | Unit | Tolerance                                                                                               |
|----------------------------------------------------------|-------|------|---------------------------------------------------------------------------------------------------------|
| Ra - Amplitude parameters - Roughness profile - ISO 4287 | 0.417 | µm   | 0.400 µm ± 0.050 µm  |

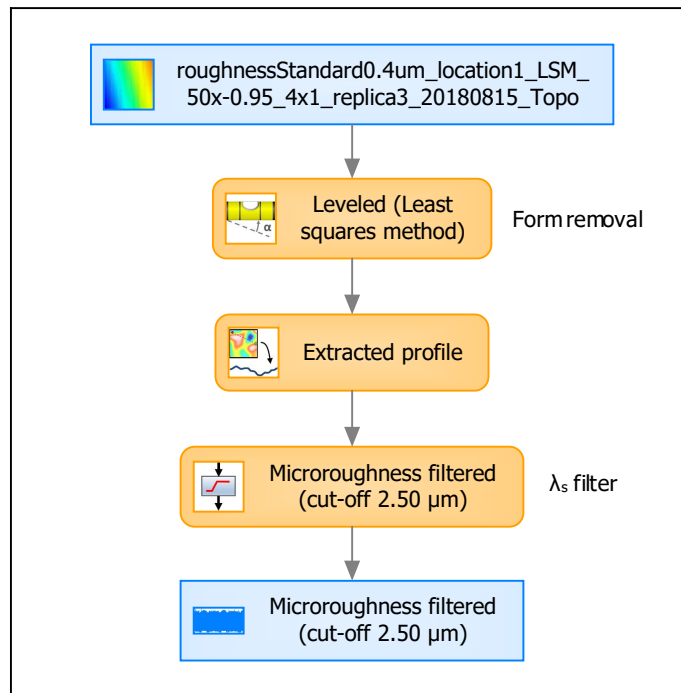

**Roughness standard  $Ra = 0.4 \mu\text{m}$   
50x objective, NA = 0.75 or 0.95, 4x1 tiles**

**Identity card - roughnessStandard0.4um\_locat...**

Name: roughnessStandard0.4um\_location2\_LSM\_50x-0.75\_...  
Created on: 8/16/2018 1:50:21 PM

**Axis: X**  
Length: 951  $\mu\text{m}$   
Size: 7625 points  
Spacing: 0.125  $\mu\text{m}$

**Axis: Y**  
Length: 258  $\mu\text{m}$   
Size: 2069 points  
Spacing: 0.125  $\mu\text{m}$

**Axis: Z**  
Length: 12.4  $\mu\text{m}$   
Size: 65532 digits  
Spacing: 0.189 nm  
NMP ratio: 0.990 % (156156 Pts)

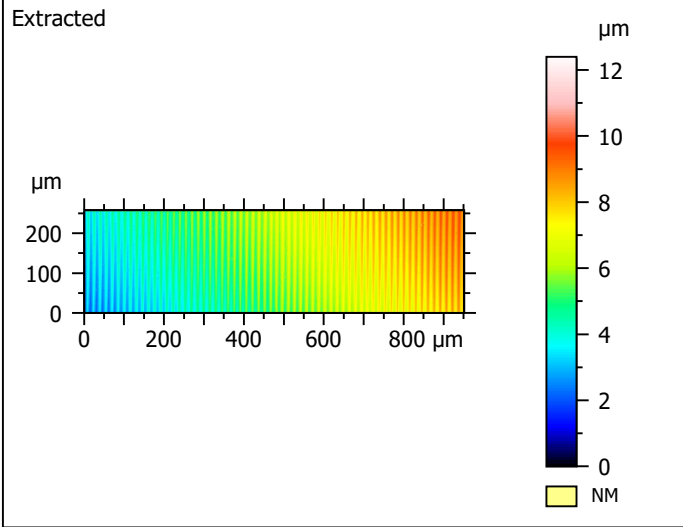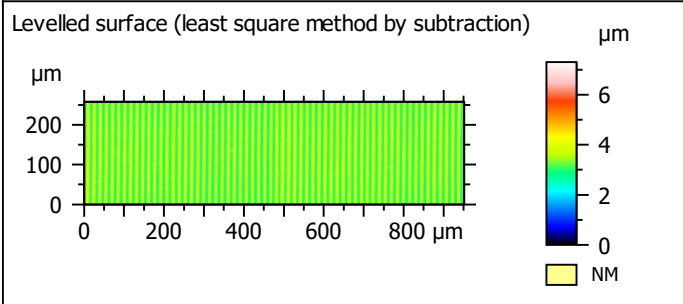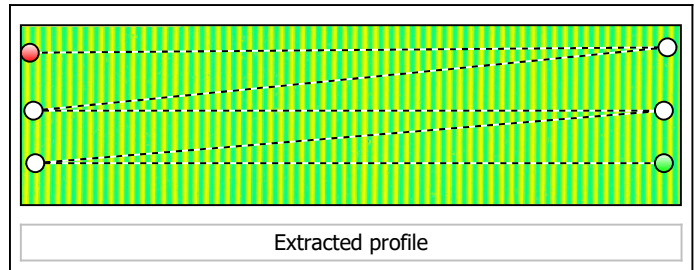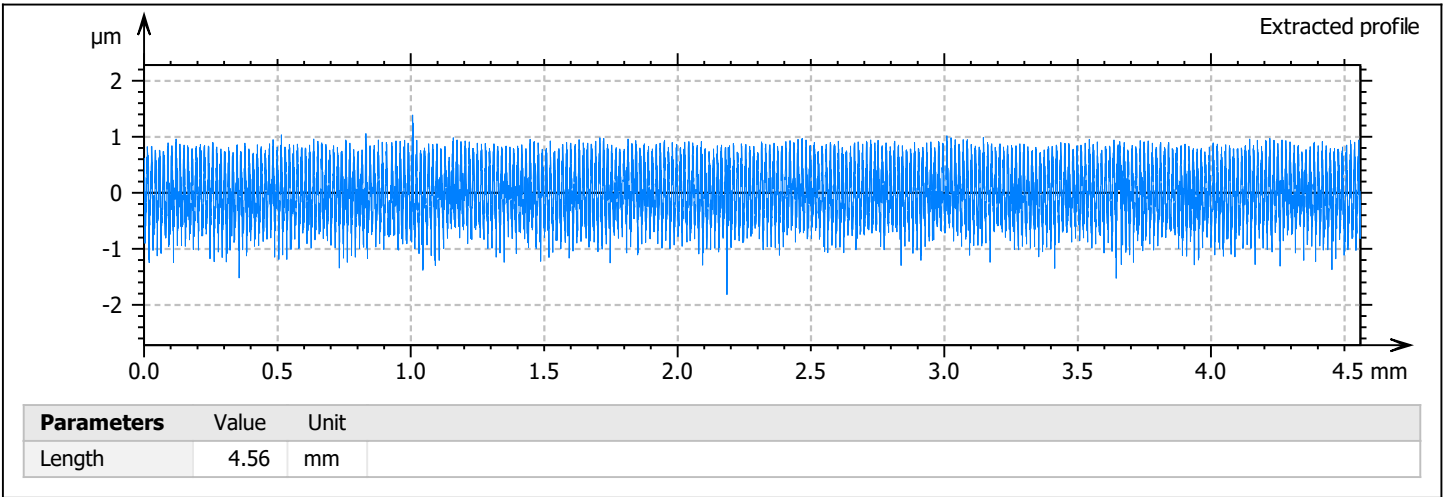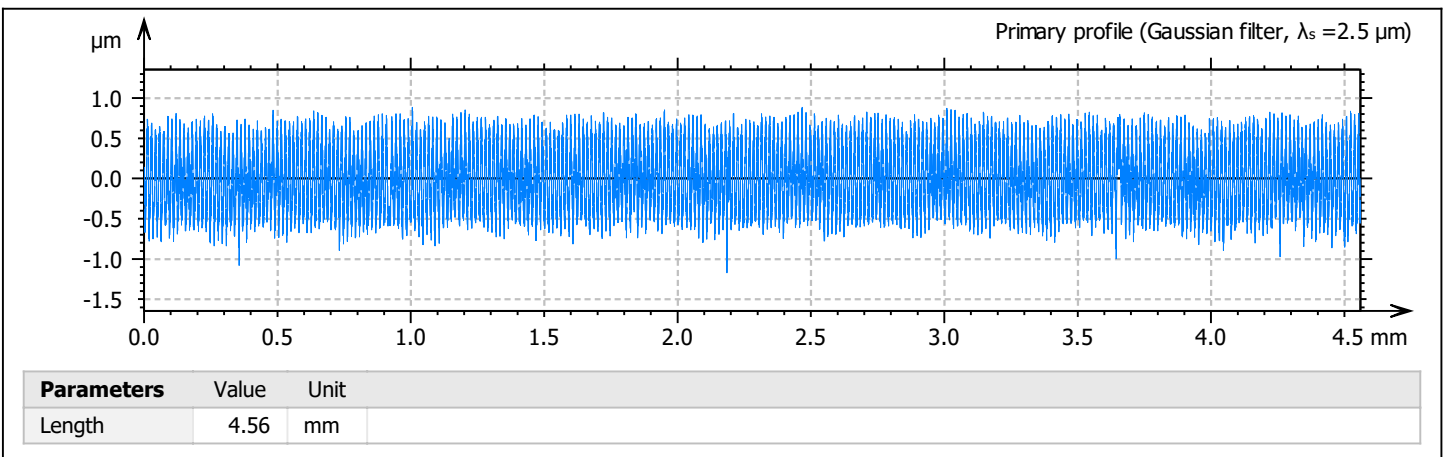

# ISO 4287

## Amplitude parameters - Roughness profile

|    |       |    |                         |                                                     |
|----|-------|----|-------------------------|-----------------------------------------------------|
| Ra | 0.396 | μm | Gaussian filter, 0.8 mm | Arithmetic mean deviation of the roughness profile. |
|----|-------|----|-------------------------|-----------------------------------------------------|

| Parameters                                               | Value | Unit | Tolerance           |
|----------------------------------------------------------|-------|------|---------------------|
| Ra - Amplitude parameters - Roughness profile - ISO 4287 | 0.396 | μm   | 0.400 μm ± 0.050 μm |

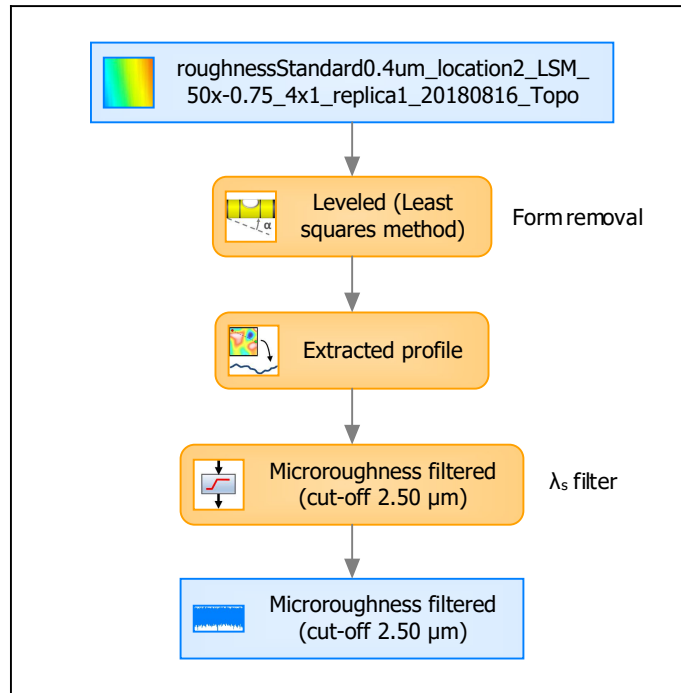

**Roughness standard  $Ra = 0.4 \mu\text{m}$   
50x objective, NA = 0.75 or 0.95, 4x1 tiles**

**Identity card - roughnessStandard0.4um\_locat...**

Name: roughnessStandard0.4um\_location2\_LSM\_50x-0.75\_...  
Created on: 8/16/2018 2:05:37 PM

**Axis: X**  
Length: 951  $\mu\text{m}$   
Size: 7622 points  
Spacing: 0.125  $\mu\text{m}$

**Axis: Y**  
Length: 258  $\mu\text{m}$   
Size: 2069 points  
Spacing: 0.125  $\mu\text{m}$

**Axis: Z**  
Length: 12.0  $\mu\text{m}$   
Size: 65532 digits  
Spacing: 0.184 nm  
NMP ratio: 0.990 % (156072 Pts)

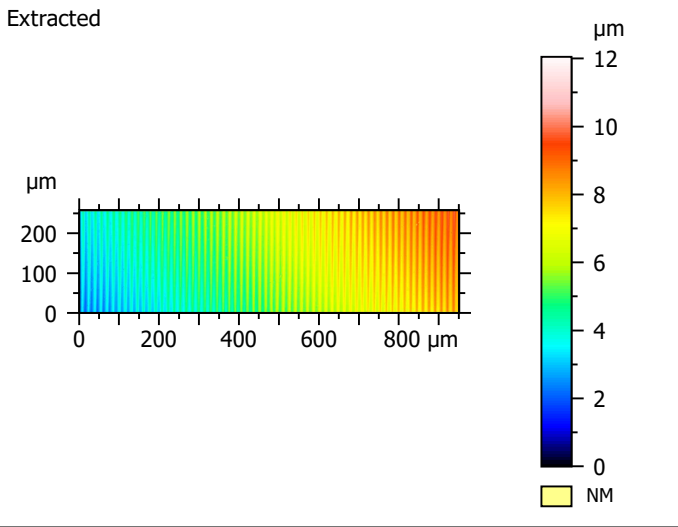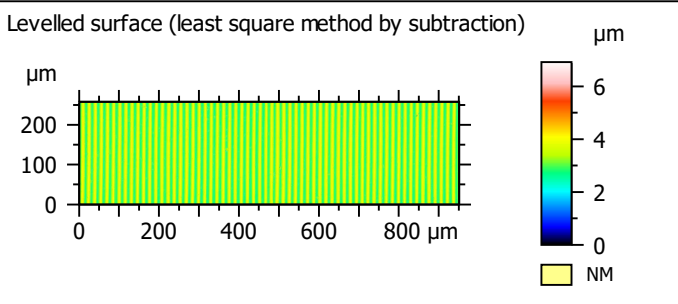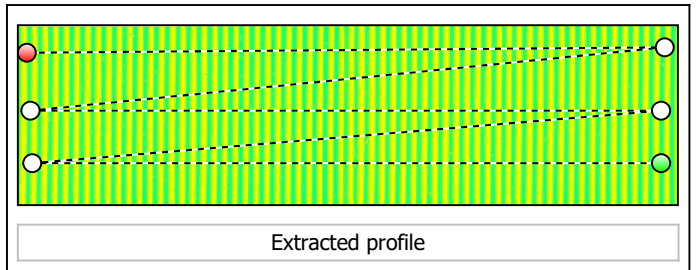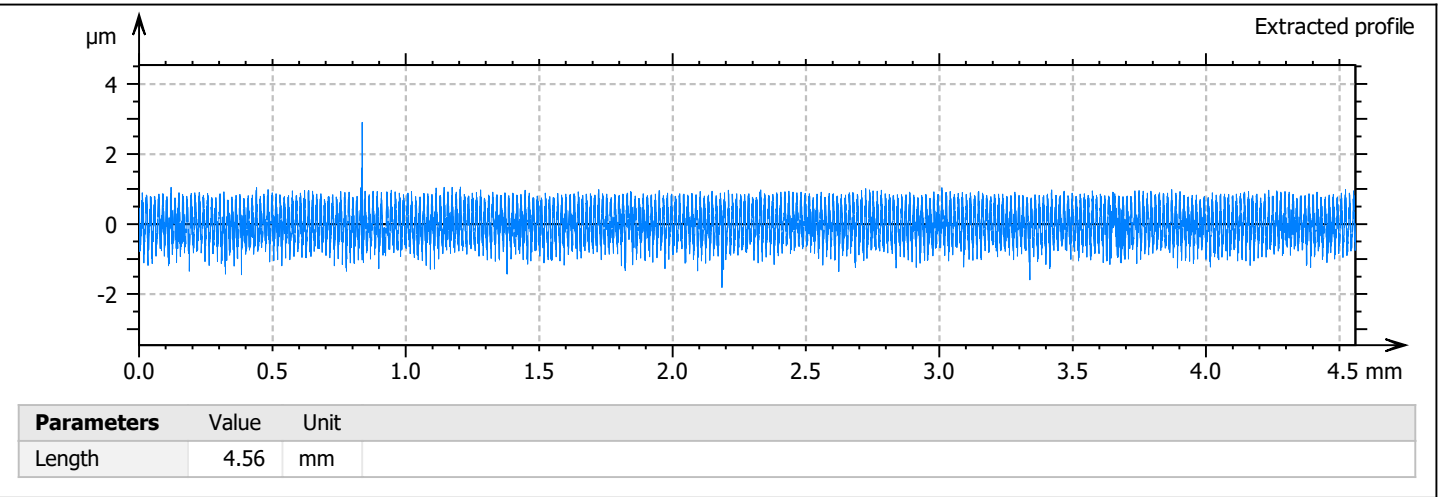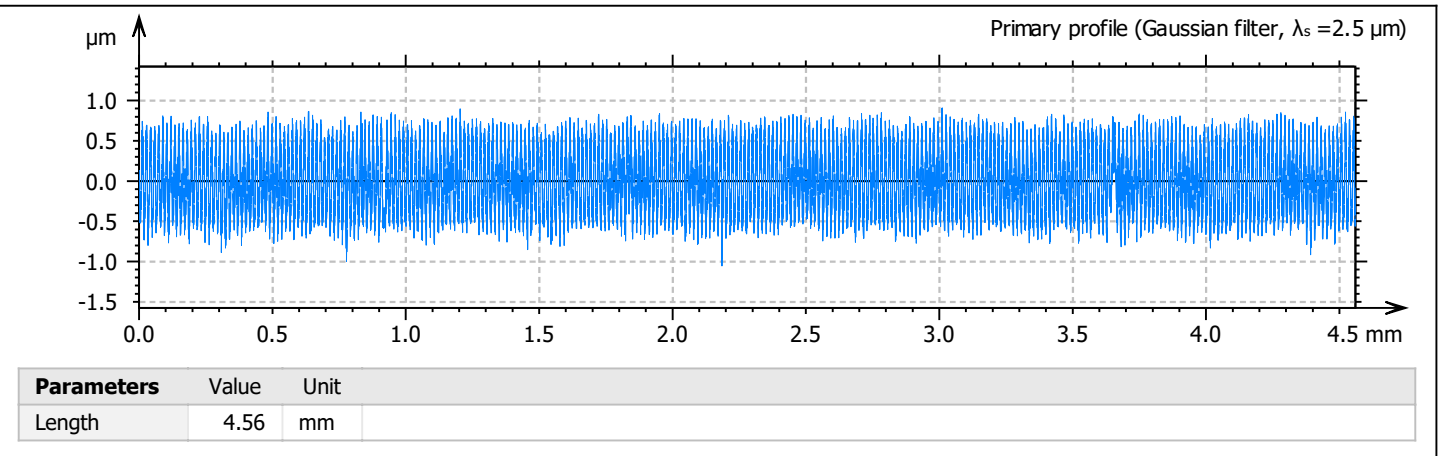



# ISO 4287

## Amplitude parameters - Roughness profile

|    |       |    |                         |                                                     |
|----|-------|----|-------------------------|-----------------------------------------------------|
| Ra | 0.398 | μm | Gaussian filter, 0.8 mm | Arithmetic mean deviation of the roughness profile. |
|----|-------|----|-------------------------|-----------------------------------------------------|

| Parameters                                               | Value | Unit | Tolerance           |
|----------------------------------------------------------|-------|------|---------------------|
| Ra - Amplitude parameters - Roughness profile - ISO 4287 | 0.398 | μm   | 0.400 μm ± 0.050 μm |

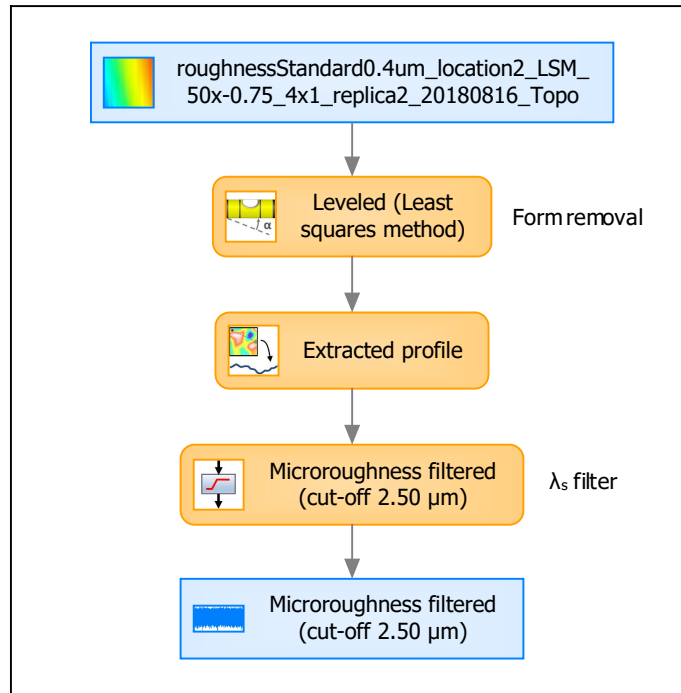

**Roughness standard  $Ra = 0.4 \mu\text{m}$   
50x objective, NA = 0.75 or 0.95, 4x1 tiles**

**Identity card - roughnessStandard0.4um\_locat...**

Name: roughnessStandard0.4um\_location2\_LSM\_50x-0.75\_...  
Created on: 8/16/2018 2:21:48 PM

**Axis: X**  
Length: 951  $\mu\text{m}$   
Size: 7625 points  
Spacing: 0.125  $\mu\text{m}$

**Axis: Y**  
Length: 258  $\mu\text{m}$   
Size: 2069 points  
Spacing: 0.125  $\mu\text{m}$

**Axis: Z**  
Length: 11.9  $\mu\text{m}$   
Size: 65531 digits  
Spacing: 0.181 nm  
NMP ratio: 0.990 % (156156 Pts)

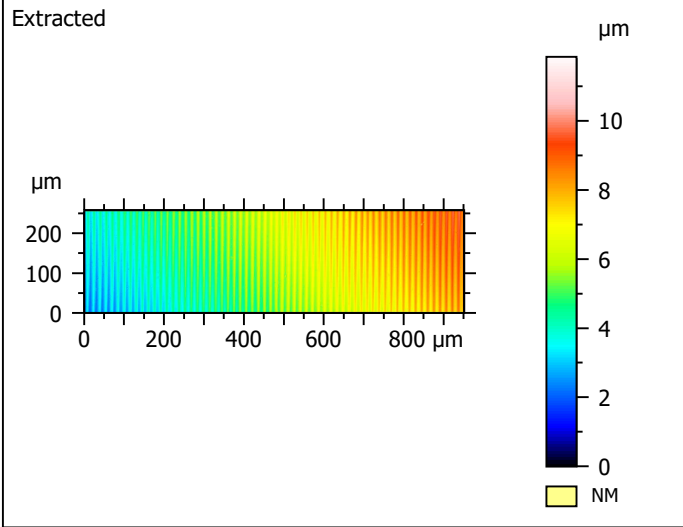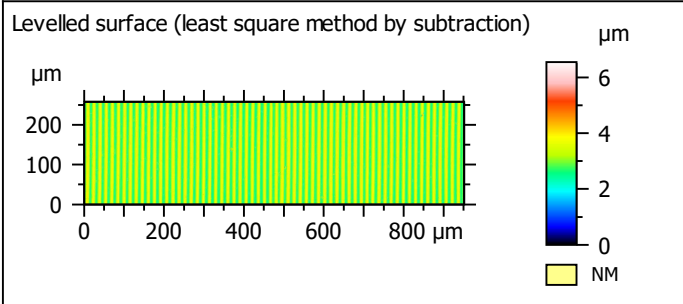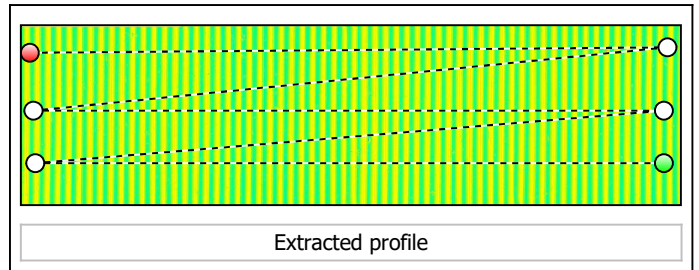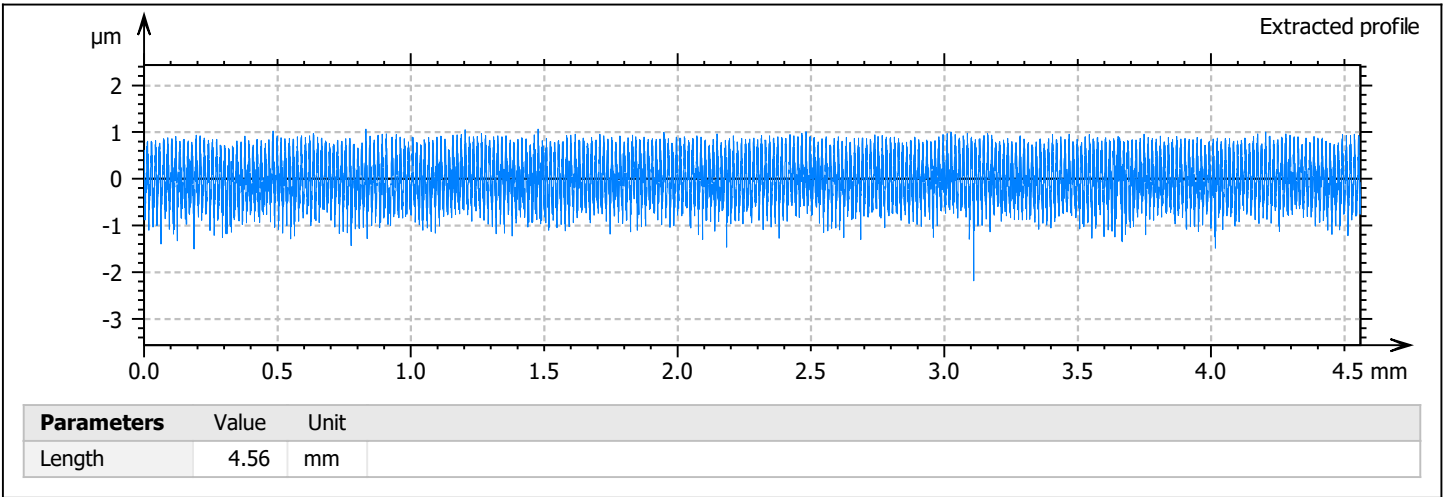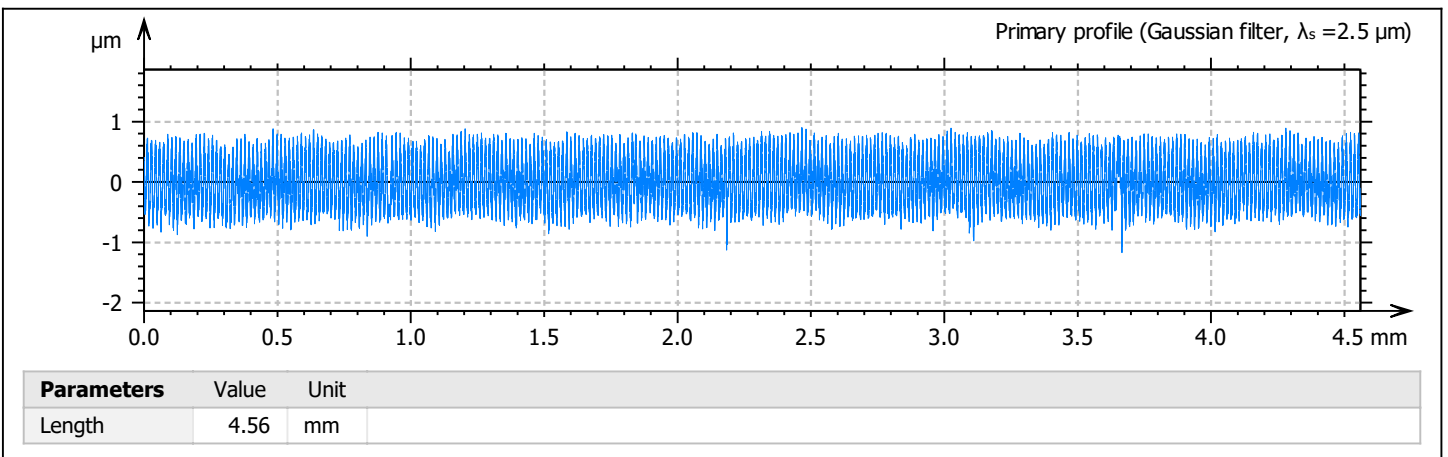

## ISO 4287

### Amplitude parameters - Roughness profile

|    |       |    |                         |                                                     |
|----|-------|----|-------------------------|-----------------------------------------------------|
| Ra | 0.398 | μm | Gaussian filter, 0.8 mm | Arithmetic mean deviation of the roughness profile. |
|----|-------|----|-------------------------|-----------------------------------------------------|

| Parameters                                               | Value | Unit | Tolerance                                                                                               |
|----------------------------------------------------------|-------|------|---------------------------------------------------------------------------------------------------------|
| Ra - Amplitude parameters - Roughness profile - ISO 4287 | 0.398 | μm   | 0.400 μm ± 0.050 μm  |

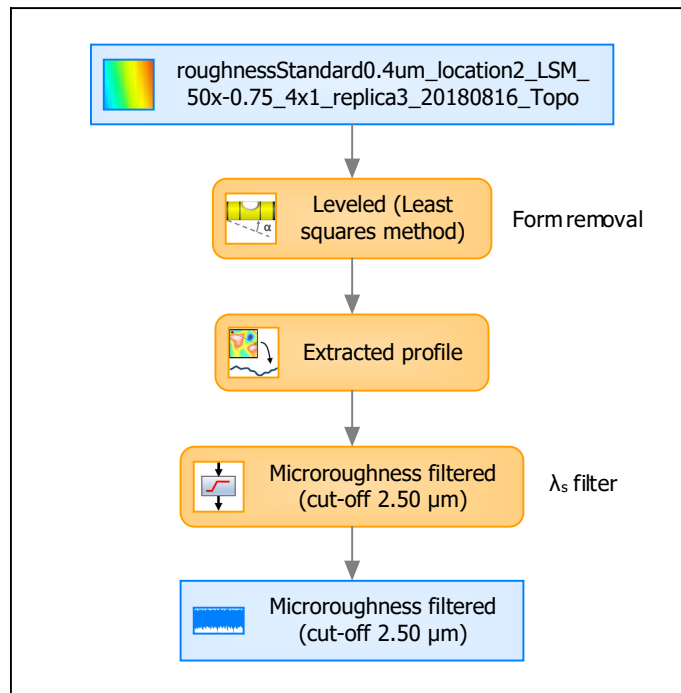

**Roughness standard  $Ra = 0.4 \mu\text{m}$   
50x objective, NA = 0.75 or 0.95, 4x1 tiles**

**Identity card - roughnessStandard0.4um\_locat...**

Name: roughnessStandard0.4um\_location2\_LSM\_50x-0.95\_...  
Created on: 8/16/2018 1:40:35 PM

**Axis: X**  
Length: 945  $\mu\text{m}$   
Size: 7574 points  
Spacing: 0.125  $\mu\text{m}$

**Axis: Y**  
Length: 258  $\mu\text{m}$   
Size: 2069 points  
Spacing: 0.125  $\mu\text{m}$

**Axis: Z**  
Length: 11.2  $\mu\text{m}$   
Size: 65531 digits  
Spacing: 0.170 nm  
NMP ratio: 0.987 % (154728 Pts)

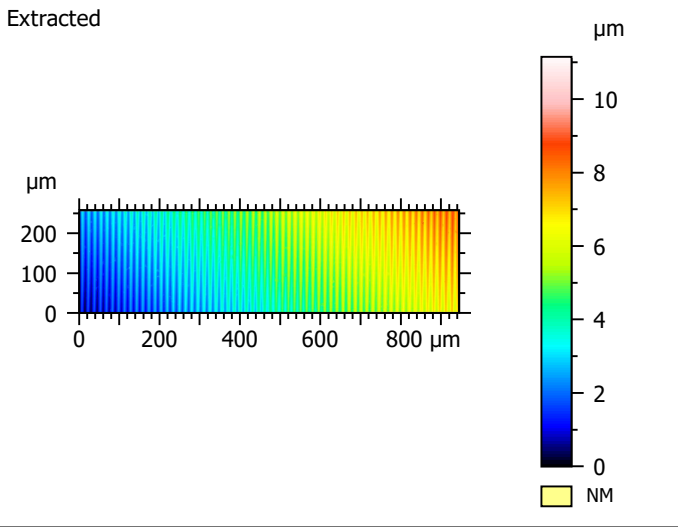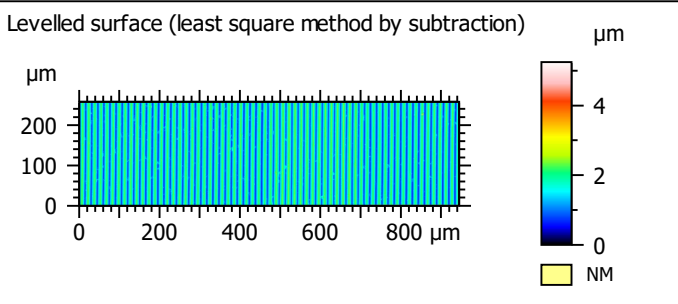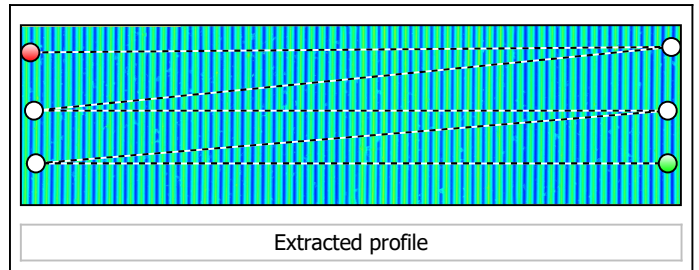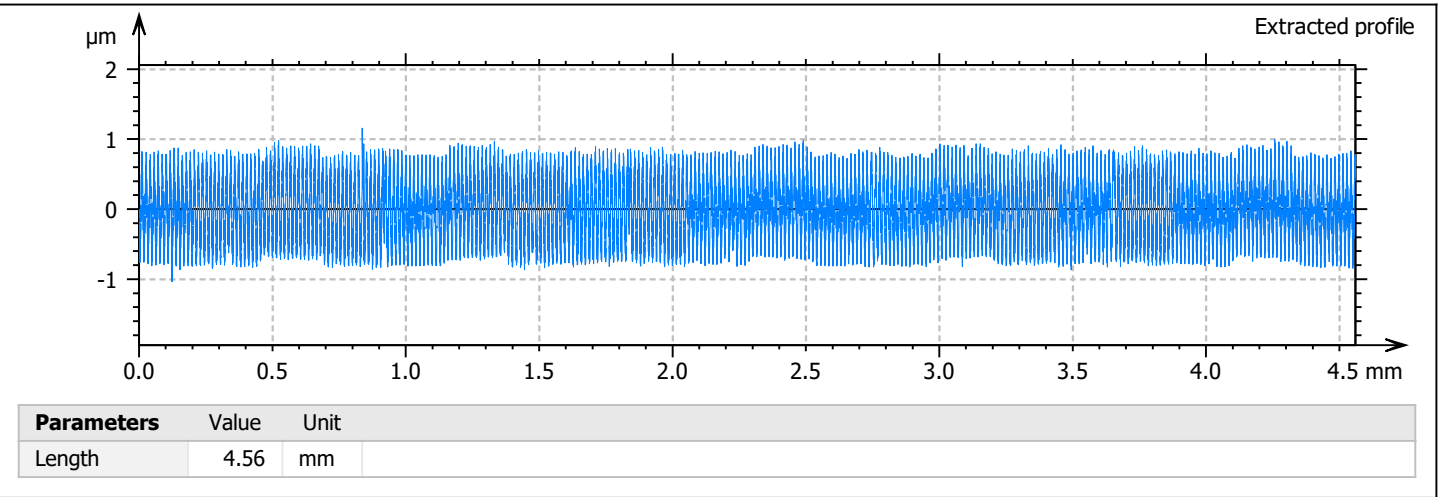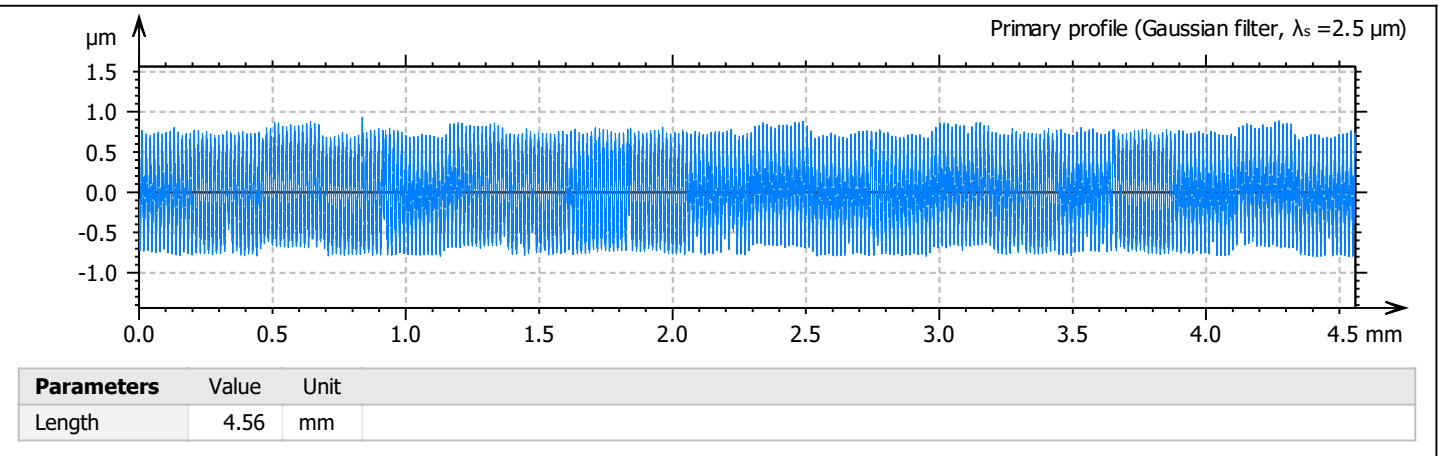

## ISO 4287

### Amplitude parameters - Roughness profile

|    |       |    |                         |                                                     |
|----|-------|----|-------------------------|-----------------------------------------------------|
| Ra | 0.419 | μm | Gaussian filter, 0.8 mm | Arithmetic mean deviation of the roughness profile. |
|----|-------|----|-------------------------|-----------------------------------------------------|

| Parameters                                               | Value | Unit | Tolerance                                                                                               |
|----------------------------------------------------------|-------|------|---------------------------------------------------------------------------------------------------------|
| Ra - Amplitude parameters - Roughness profile - ISO 4287 | 0.419 | μm   | 0.400 μm ± 0.050 μm  |

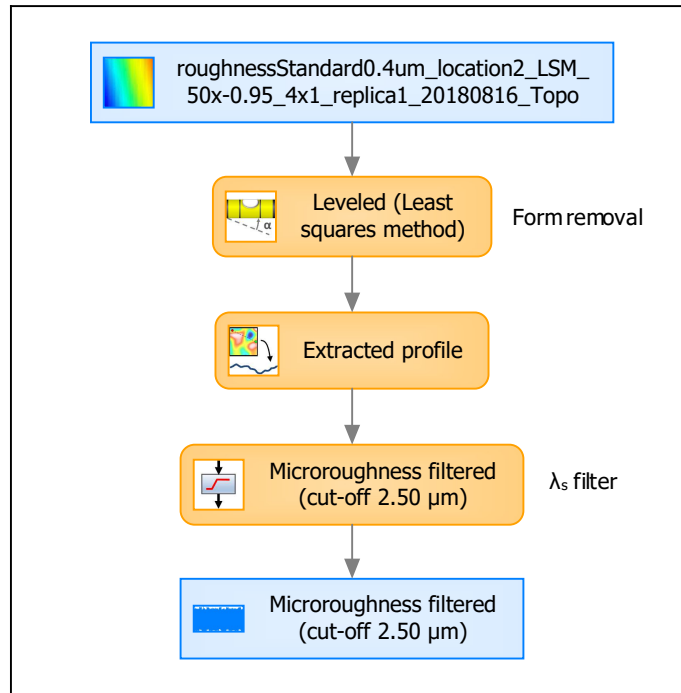

**Roughness standard  $Ra = 0.4 \mu\text{m}$   
50x objective, NA = 0.75 or 0.95, 4x1 tiles**

**Identity card - roughnessStandard0.4um\_locat...**

Name: roughnessStandard0.4um\_location2\_LSM\_50x-0.95\_...  
Created on: 8/16/2018 1:58:03 PM

**Axis: X**  
Length: 945  $\mu\text{m}$   
Size: 7577 points  
Spacing: 0.125  $\mu\text{m}$

**Axis: Y**  
Length: 258  $\mu\text{m}$   
Size: 2069 points  
Spacing: 0.125  $\mu\text{m}$

**Axis: Z**  
Length: 11.0  $\mu\text{m}$   
Size: 65531 digits  
Spacing: 0.168 nm  
NMP ratio: 0.988 % (154812 Pts)

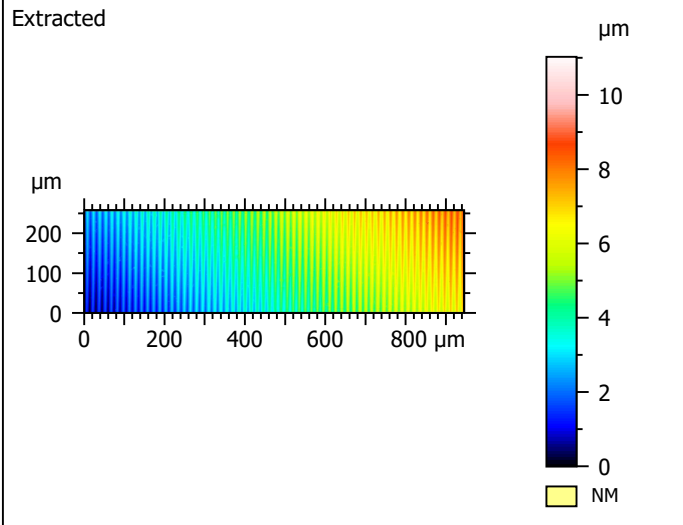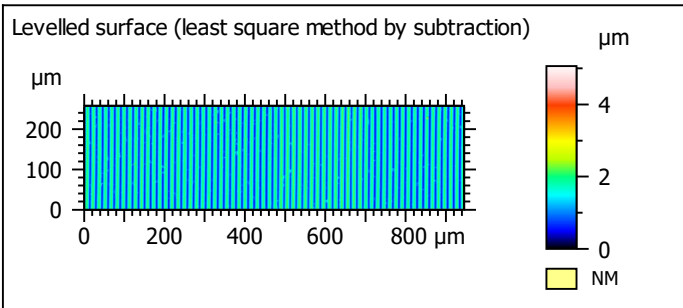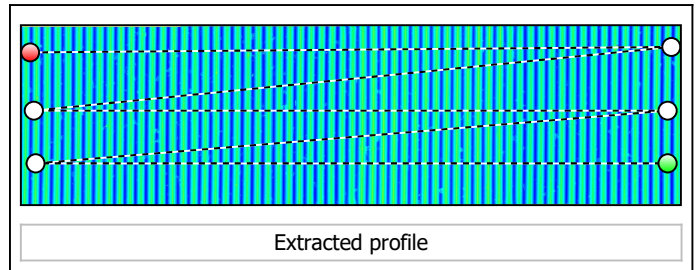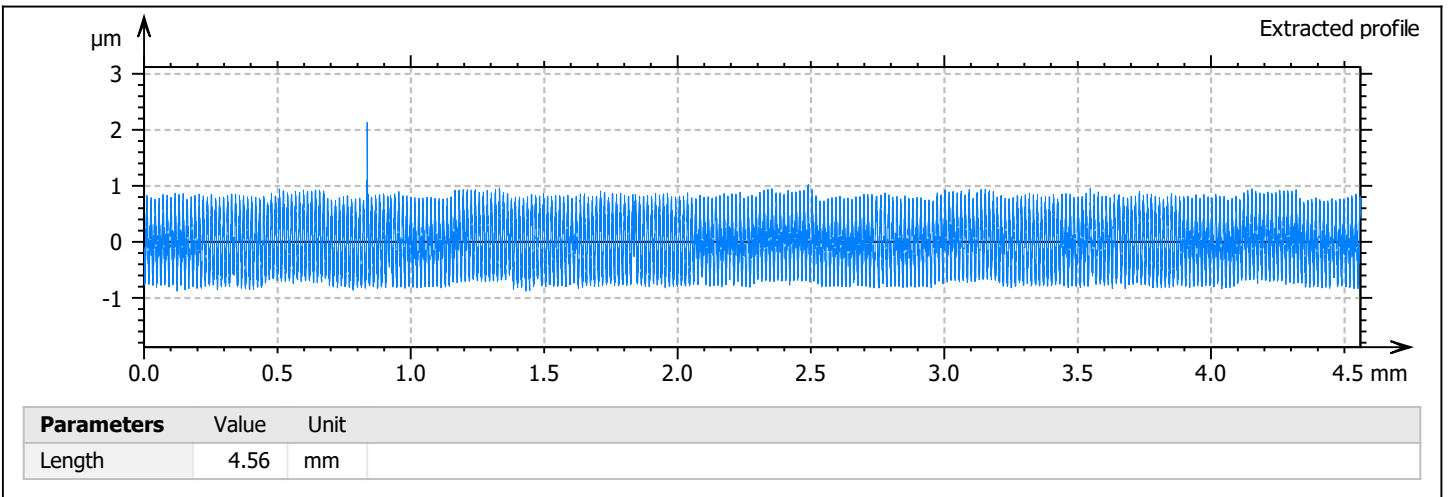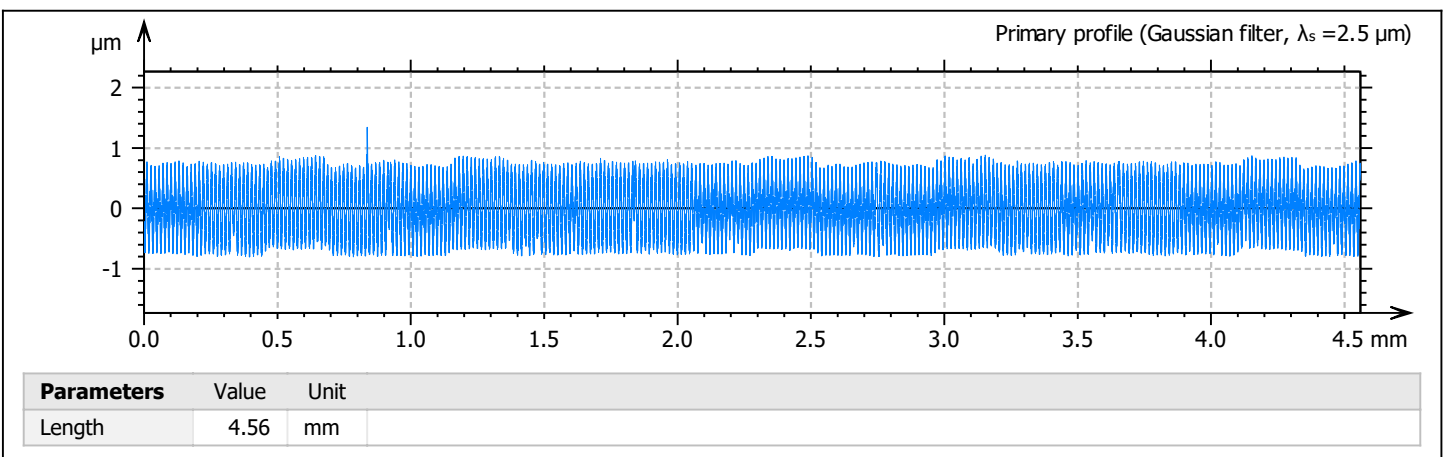

## ISO 4287

### Amplitude parameters - Roughness profile

|    |       |    |                         |                                                     |
|----|-------|----|-------------------------|-----------------------------------------------------|
| Ra | 0.420 | μm | Gaussian filter, 0.8 mm | Arithmetic mean deviation of the roughness profile. |
|----|-------|----|-------------------------|-----------------------------------------------------|

| Parameters                                               | Value | Unit | Tolerance           |
|----------------------------------------------------------|-------|------|---------------------|
| Ra - Amplitude parameters - Roughness profile - ISO 4287 | 0.420 | μm   | 0.400 μm ± 0.050 μm |

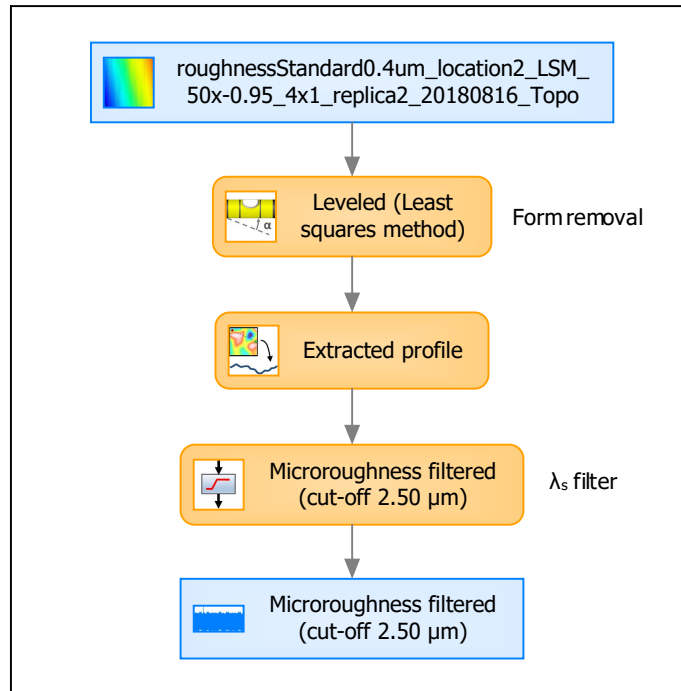

**Roughness standard  $Ra = 0.4 \mu\text{m}$   
50x objective, NA = 0.75 or 0.95, 4x1 tiles**

**Identity card - roughnessStandard0.4um\_locat...**

Name: roughnessStandard0.4um\_location2\_LSM\_50x-0.95\_...  
Created on: 8/16/2018 2:13:32 PM

**Axis: X**  
Length: 945  $\mu\text{m}$   
Size: 7574 points  
Spacing: 0.125  $\mu\text{m}$

**Axis: Y**  
Length: 258  $\mu\text{m}$   
Size: 2069 points  
Spacing: 0.125  $\mu\text{m}$

**Axis: Z**  
Length: 10.3  $\mu\text{m}$   
Size: 65532 digits  
Spacing: 0.157 nm  
NMP ratio: 0.987 % (154728 Pts)

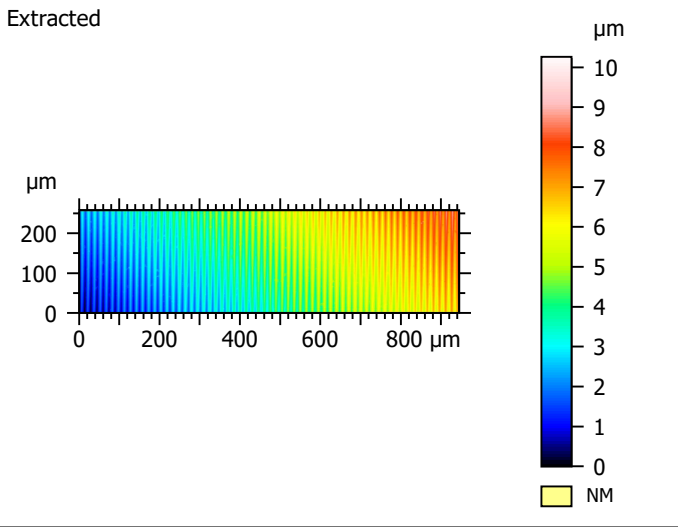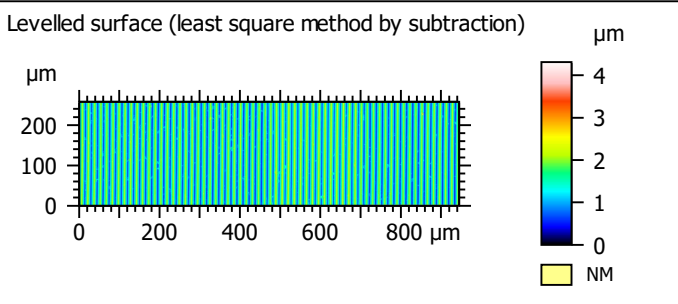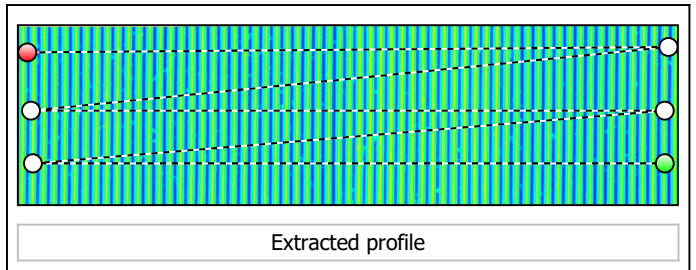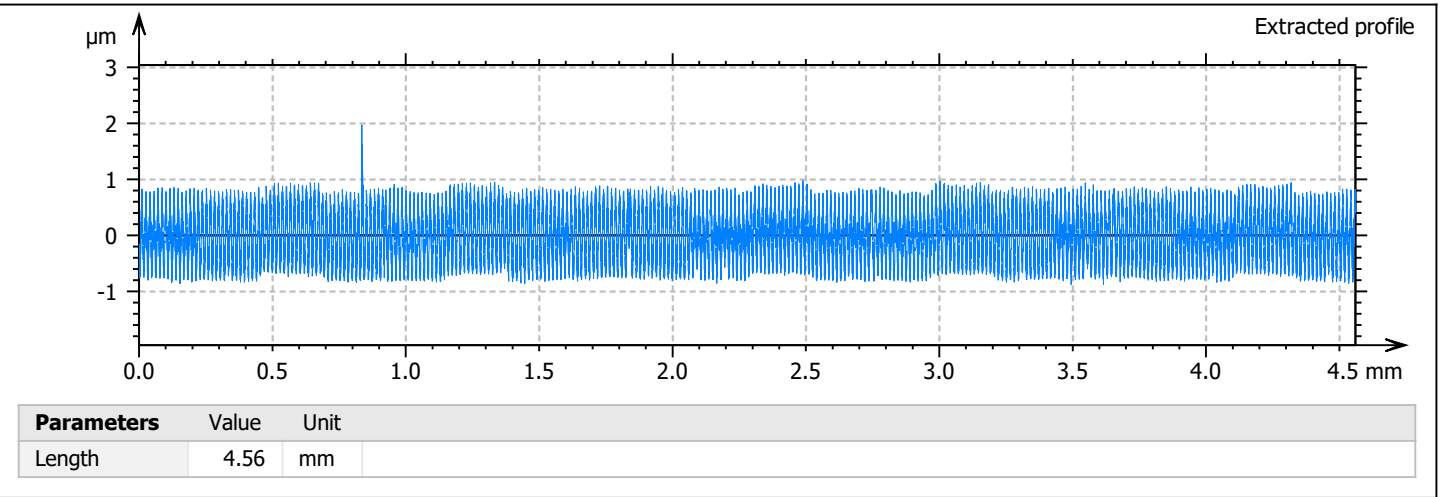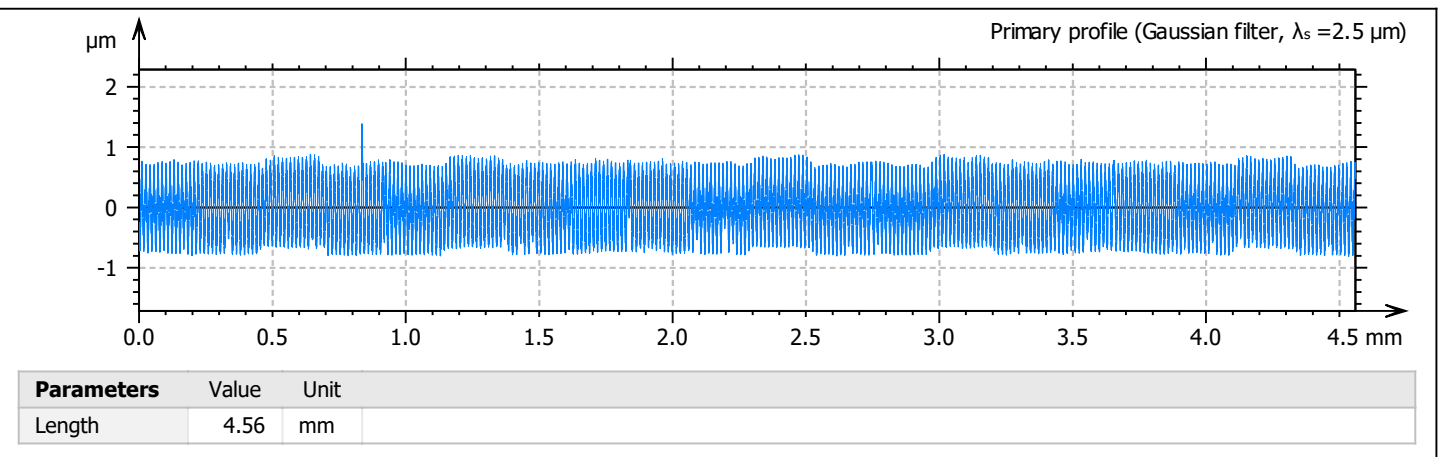



## ISO 4287

### Amplitude parameters - Roughness profile

|    |       |    |                         |                                                     |
|----|-------|----|-------------------------|-----------------------------------------------------|
| Ra | 0.418 | μm | Gaussian filter, 0.8 mm | Arithmetic mean deviation of the roughness profile. |
|----|-------|----|-------------------------|-----------------------------------------------------|

| Parameters                                               | Value | Unit | Tolerance                                                                                               |
|----------------------------------------------------------|-------|------|---------------------------------------------------------------------------------------------------------|
| Ra - Amplitude parameters - Roughness profile - ISO 4287 | 0.418 | μm   | 0.400 μm ± 0.050 μm  |

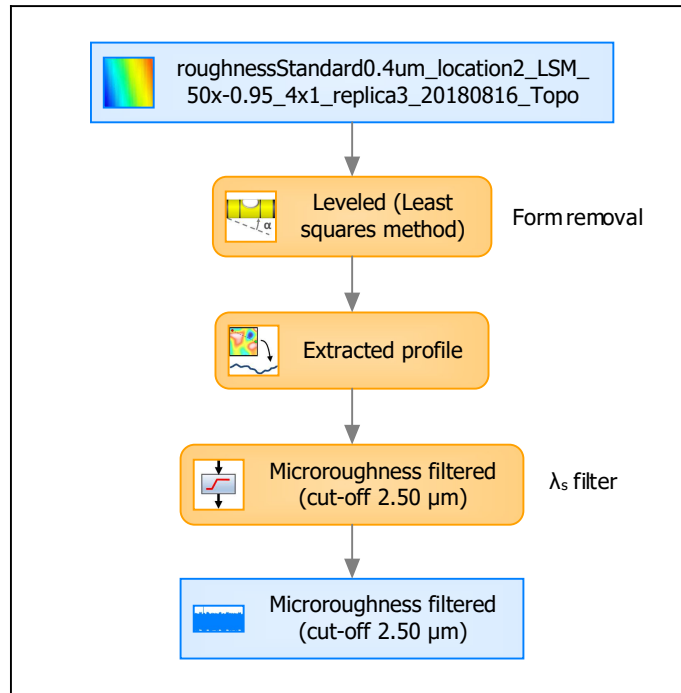

**Roughness standard  $Ra = 0.4 \mu\text{m}$   
50x objective, NA = 0.75 or 0.95, 4x1 tiles**

**Identity card - roughnessStandard0.4um\_locat...**

Name: roughnessStandard0.4um\_location3\_LSM\_50x-0.75\_...  
Created on: 8/17/2018 2:05:20 PM

**Axis: X**  
Length: 950  $\mu\text{m}$   
Size: 7611 points  
Spacing: 0.125  $\mu\text{m}$

**Axis: Y**  
Length: 258  $\mu\text{m}$   
Size: 2069 points  
Spacing: 0.125  $\mu\text{m}$

**Axis: Z**  
Length: 12.2  $\mu\text{m}$   
Size: 65531 digits  
Spacing: 0.186 nm  
NMP ratio: 0.989 % (155764 Pts)

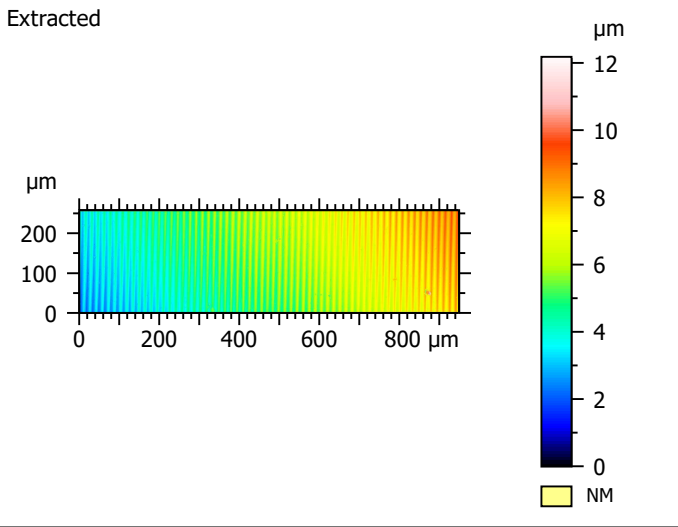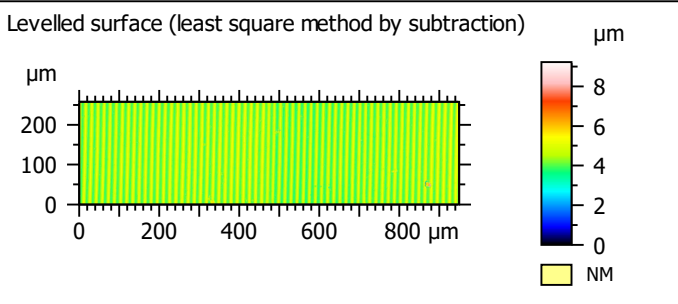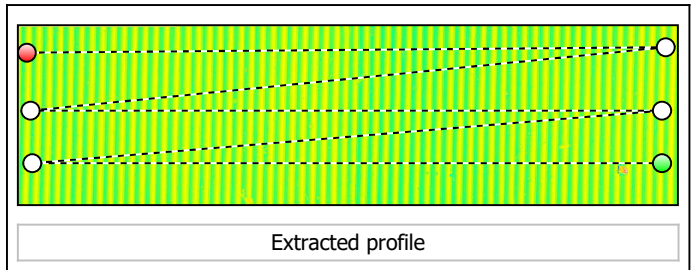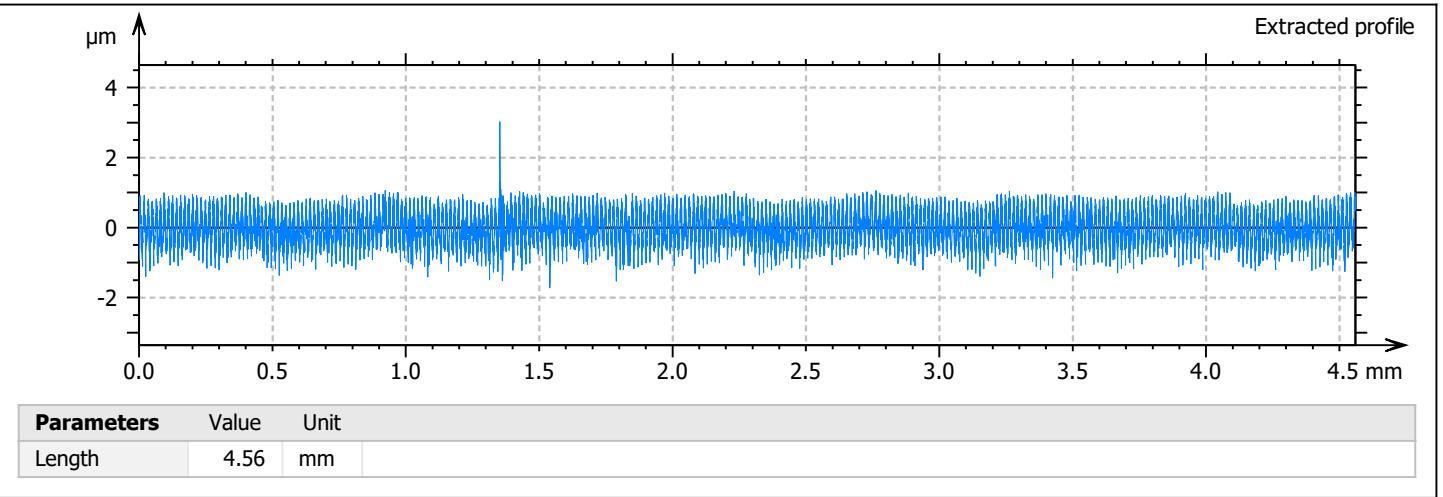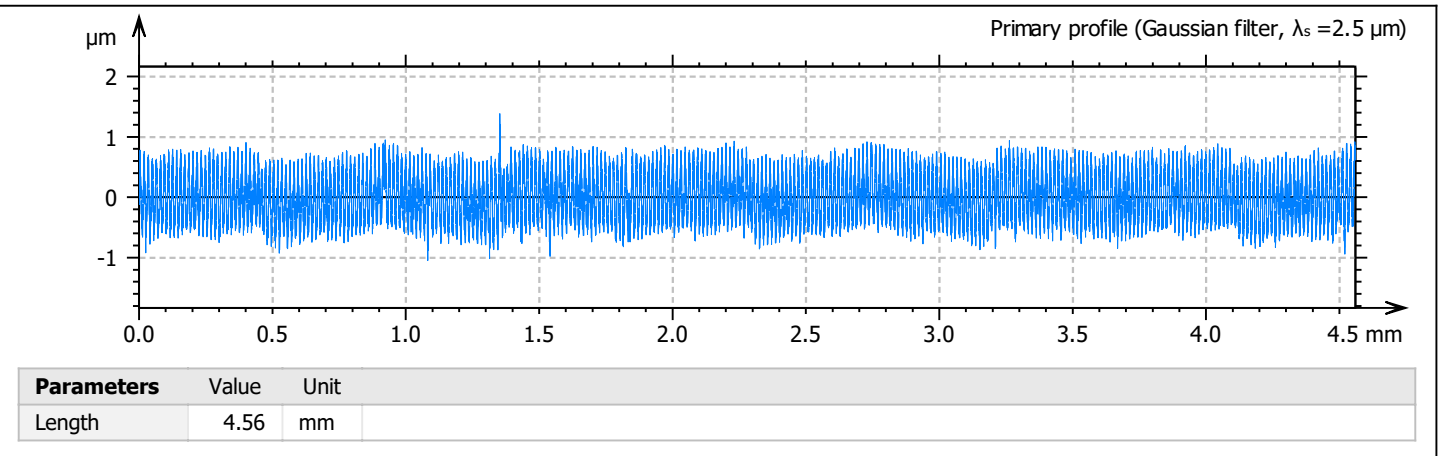

# ISO 4287

## Amplitude parameters - Roughness profile

|    |       |    |                         |                                                     |
|----|-------|----|-------------------------|-----------------------------------------------------|
| Ra | 0.397 | µm | Gaussian filter, 0.8 mm | Arithmetic mean deviation of the roughness profile. |
|----|-------|----|-------------------------|-----------------------------------------------------|

| Parameters                                               | Value | Unit | Tolerance           |
|----------------------------------------------------------|-------|------|---------------------|
| Ra - Amplitude parameters - Roughness profile - ISO 4287 | 0.397 | µm   | 0.400 µm ± 0.050 µm |

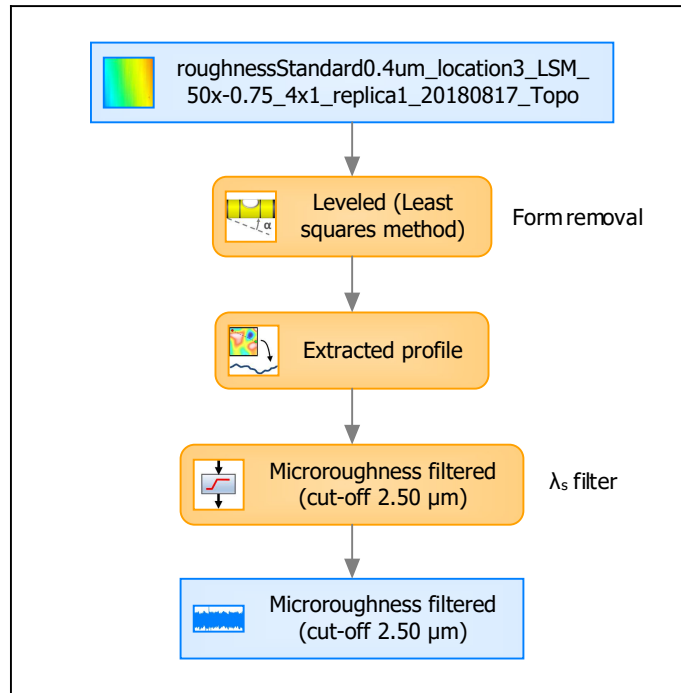

**Roughness standard  $Ra = 0.4 \mu\text{m}$   
50x objective, NA = 0.75 or 0.95, 4x1 tiles**

**Identity card - roughnessStandard0.4um\_locat...**

Name: roughnessStandard0.4um\_location3\_LSM\_50x-0.75\_...  
Created on: 8/17/2018 2:24:37 PM

**Axis: X**  
Length: 950  $\mu\text{m}$   
Size: 7611 points  
Spacing: 0.125  $\mu\text{m}$

**Axis: Y**  
Length: 258  $\mu\text{m}$   
Size: 2069 points  
Spacing: 0.125  $\mu\text{m}$

**Axis: Z**  
Length: 12.4  $\mu\text{m}$   
Size: 65532 digits  
Spacing: 0.190 nm  
NMP ratio: 0.989 % (155764 Pts)

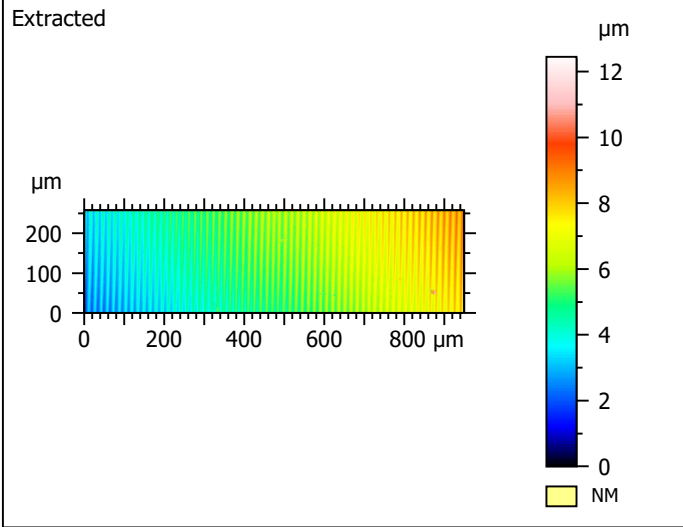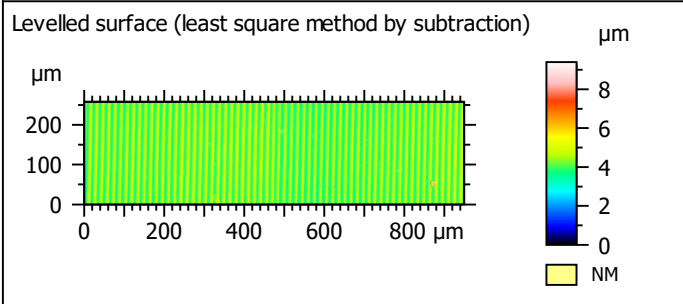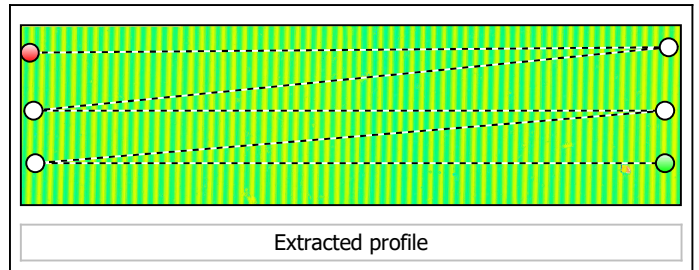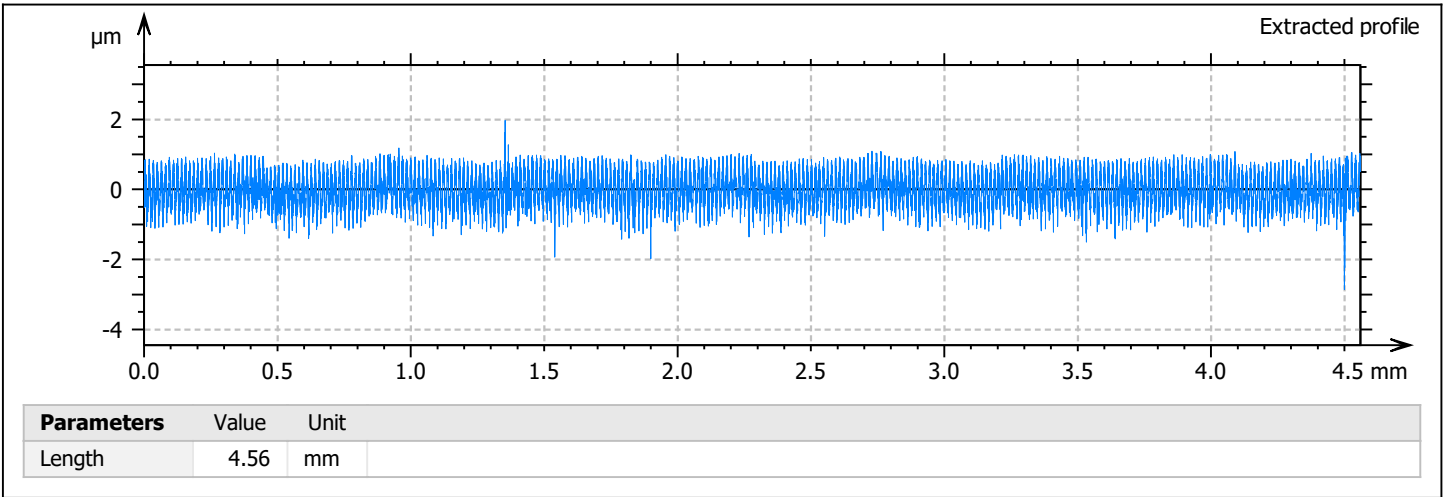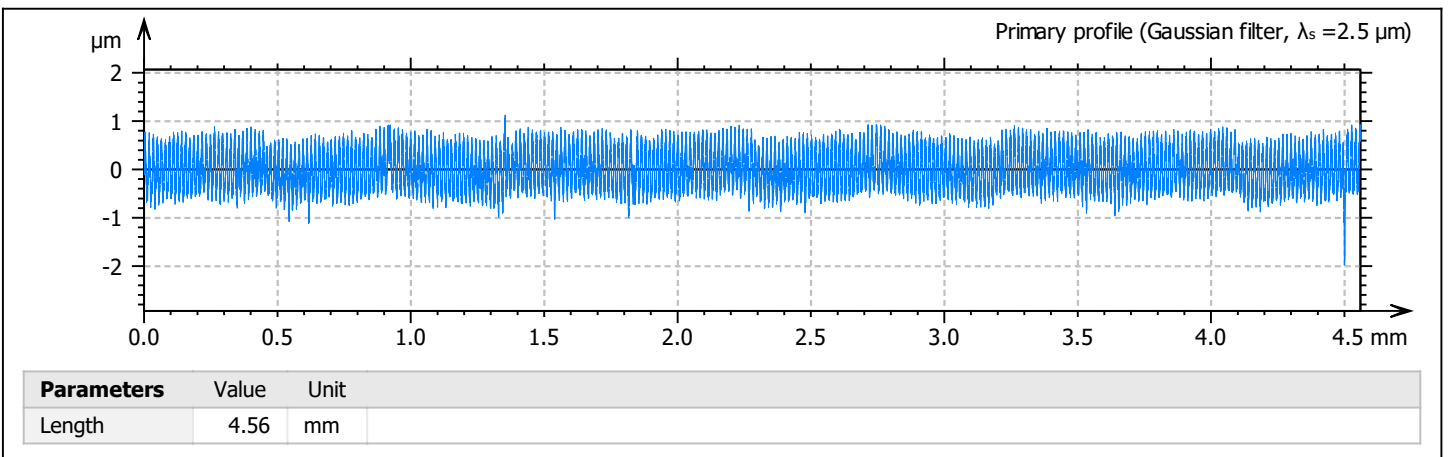

## ISO 4287

### Amplitude parameters - Roughness profile

|    |       |    |                         |                                                     |
|----|-------|----|-------------------------|-----------------------------------------------------|
| Ra | 0.398 | μm | Gaussian filter, 0.8 mm | Arithmetic mean deviation of the roughness profile. |
|----|-------|----|-------------------------|-----------------------------------------------------|

| Parameters                                               | Value | Unit | Tolerance                                                                                               |
|----------------------------------------------------------|-------|------|---------------------------------------------------------------------------------------------------------|
| Ra - Amplitude parameters - Roughness profile - ISO 4287 | 0.398 | μm   | 0.400 μm ± 0.050 μm  |

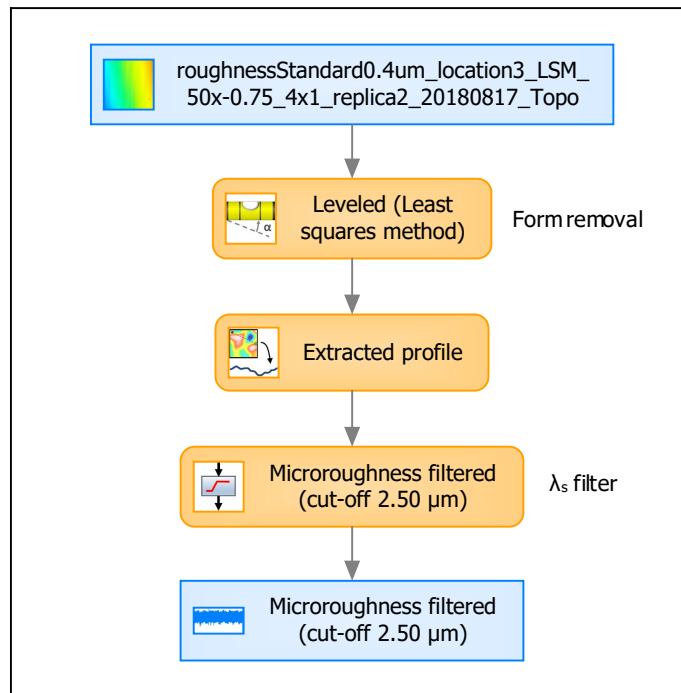

**Roughness standard  $Ra = 0.4 \mu\text{m}$   
50x objective, NA = 0.75 or 0.95, 4x1 tiles**

**Identity card - roughnessStandard0.4um\_locat...**

Name: roughnessStandard0.4um\_location3\_LSM\_50x-0.75\_...  
Created on: 8/17/2018 2:41:54 PM

**Axis: X**  
Length: 950  $\mu\text{m}$   
Size: 7611 points  
Spacing: 0.125  $\mu\text{m}$

**Axis: Y**  
Length: 258  $\mu\text{m}$   
Size: 2069 points  
Spacing: 0.125  $\mu\text{m}$

**Axis: Z**  
Length: 11.8  $\mu\text{m}$   
Size: 65532 digits  
Spacing: 0.180 nm  
NMP ratio: 0.989 % (155764 Pts)

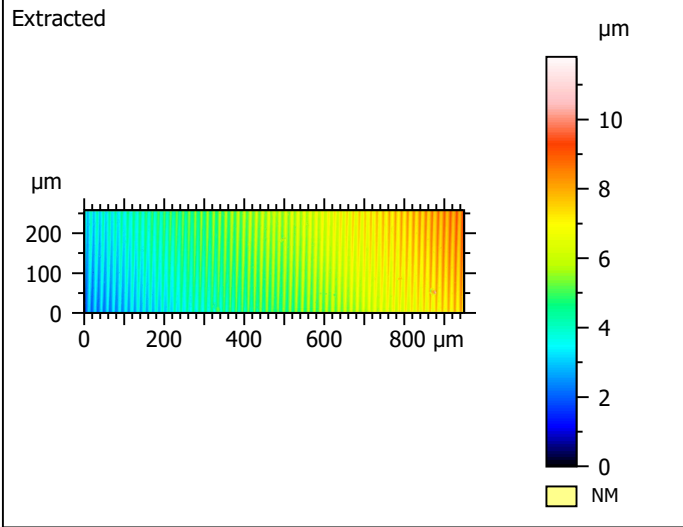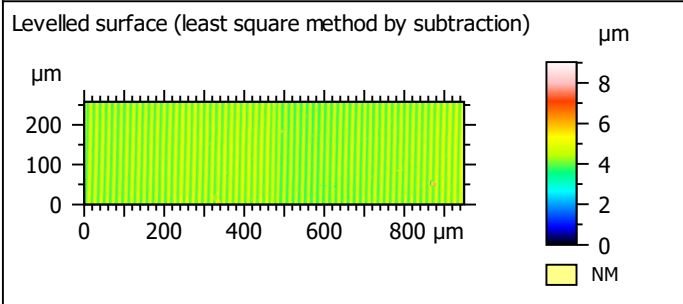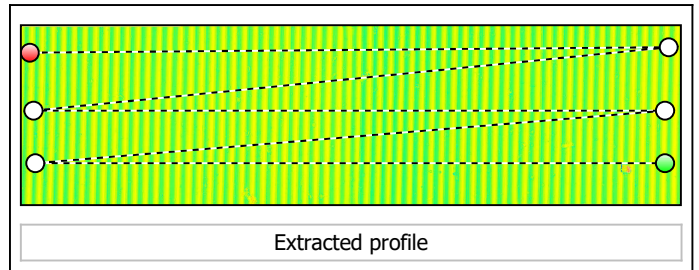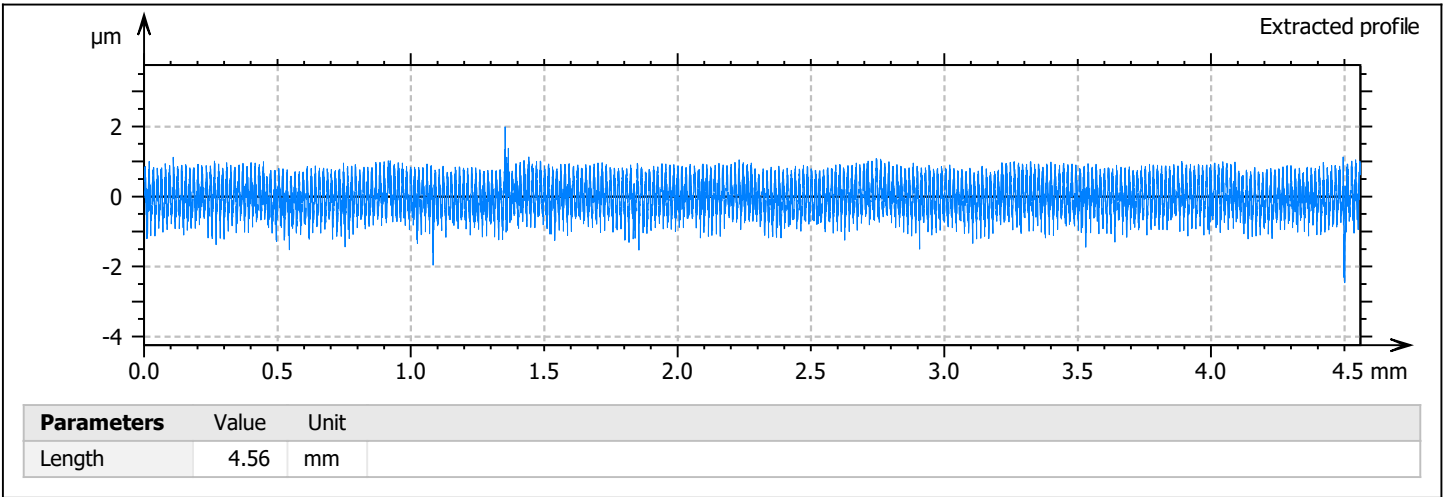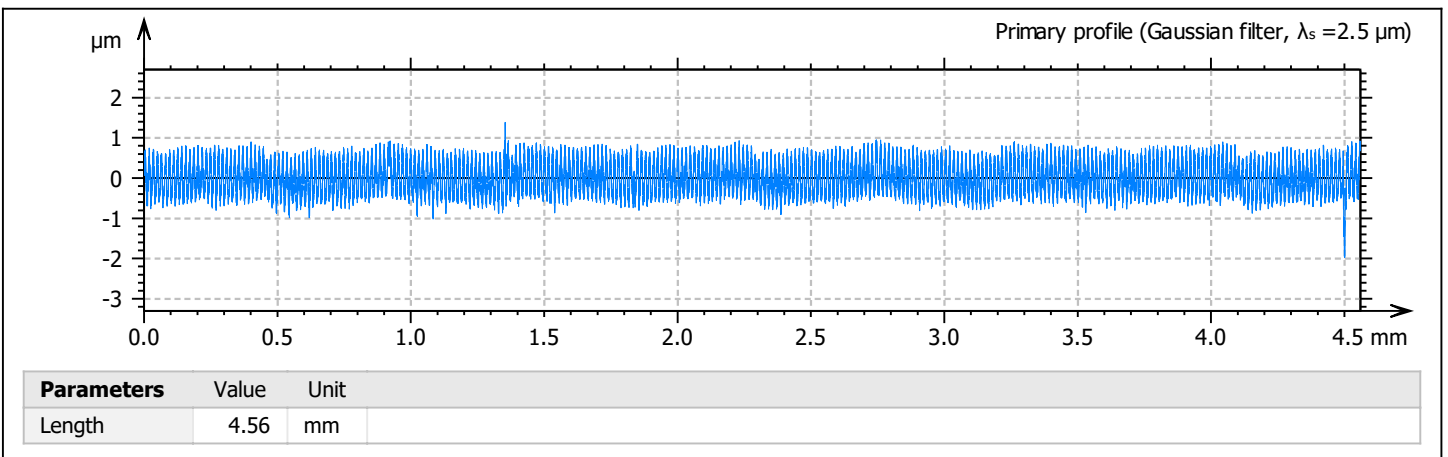

# ISO 4287

## Amplitude parameters - Roughness profile

|    |       |    |                         |                                                     |
|----|-------|----|-------------------------|-----------------------------------------------------|
| Ra | 0.398 | µm | Gaussian filter, 0.8 mm | Arithmetic mean deviation of the roughness profile. |
|----|-------|----|-------------------------|-----------------------------------------------------|

| Parameters                                               | Value | Unit | Tolerance                                                                                               |
|----------------------------------------------------------|-------|------|---------------------------------------------------------------------------------------------------------|
| Ra - Amplitude parameters - Roughness profile - ISO 4287 | 0.398 | µm   | 0.400 µm ± 0.050 µm  |

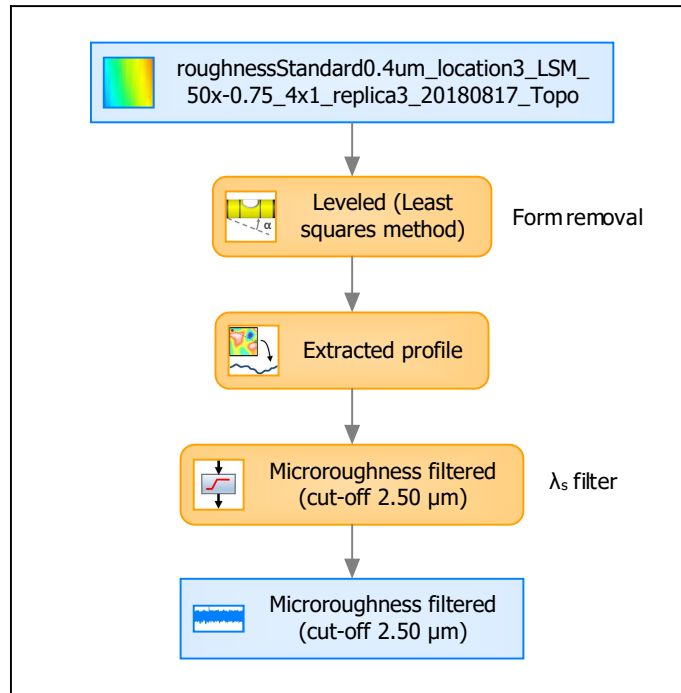

**Roughness standard  $Ra = 0.4 \mu\text{m}$   
50x objective, NA = 0.75 or 0.95, 4x1 tiles**

**Identity card - roughnessStandard0.4um\_locat...**

Name: roughnessStandard0.4um\_location3\_LSM\_50x-0.95\_...  
Created on: 8/17/2018 1:55:40 PM

**Axis: X**  
Length: 944  $\mu\text{m}$   
Size: 7563 points  
Spacing: 0.125  $\mu\text{m}$

**Axis: Y**  
Length: 258  $\mu\text{m}$   
Size: 2069 points  
Spacing: 0.125  $\mu\text{m}$

**Axis: Z**  
Length: 10.4  $\mu\text{m}$   
Size: 65531 digits  
Spacing: 0.158 nm  
NMP ratio: 0.987 % (154420 Pts)

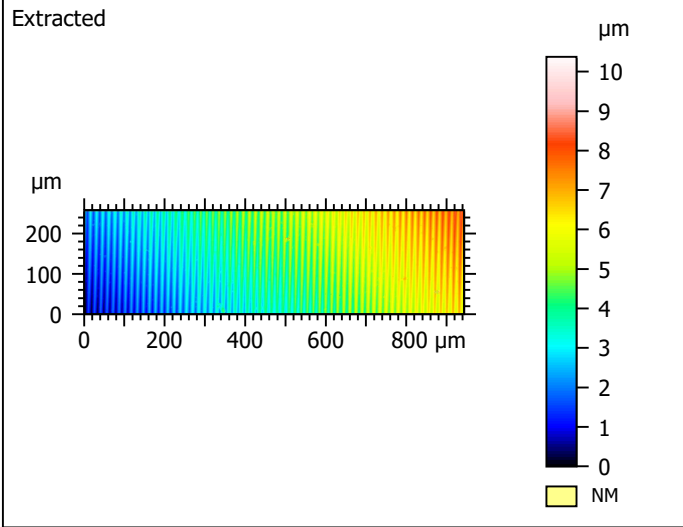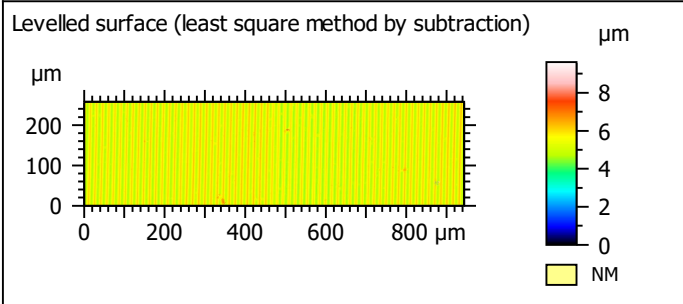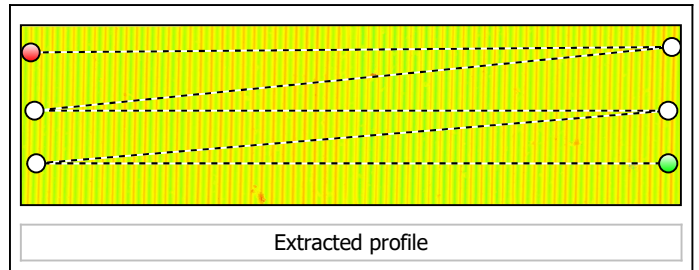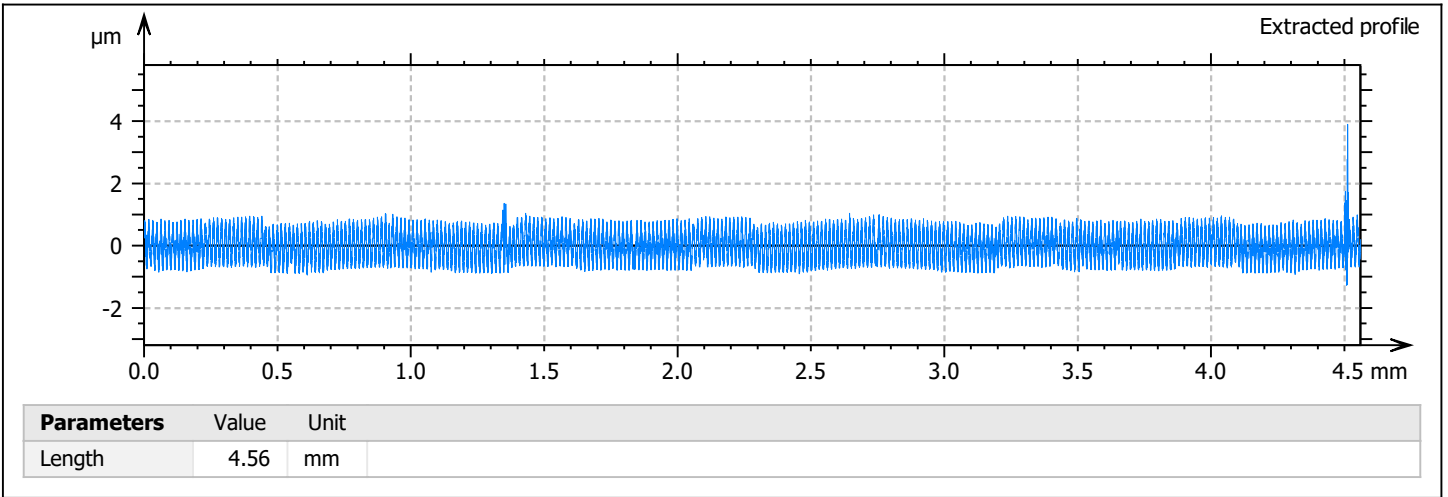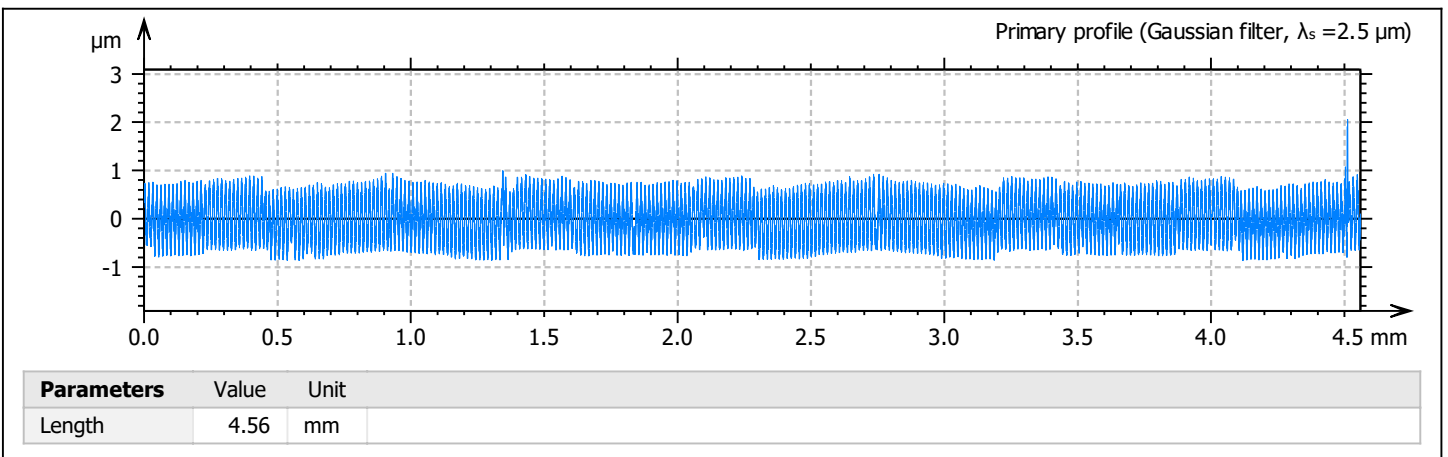



## ISO 4287

### Amplitude parameters - Roughness profile

|    |       |    |                         |                                                     |
|----|-------|----|-------------------------|-----------------------------------------------------|
| Ra | 0.420 | μm | Gaussian filter, 0.8 mm | Arithmetic mean deviation of the roughness profile. |
|----|-------|----|-------------------------|-----------------------------------------------------|

| Parameters                                               | Value | Unit | Tolerance           |
|----------------------------------------------------------|-------|------|---------------------|
| Ra - Amplitude parameters - Roughness profile - ISO 4287 | 0.420 | μm   | 0.400 μm ± 0.050 μm |

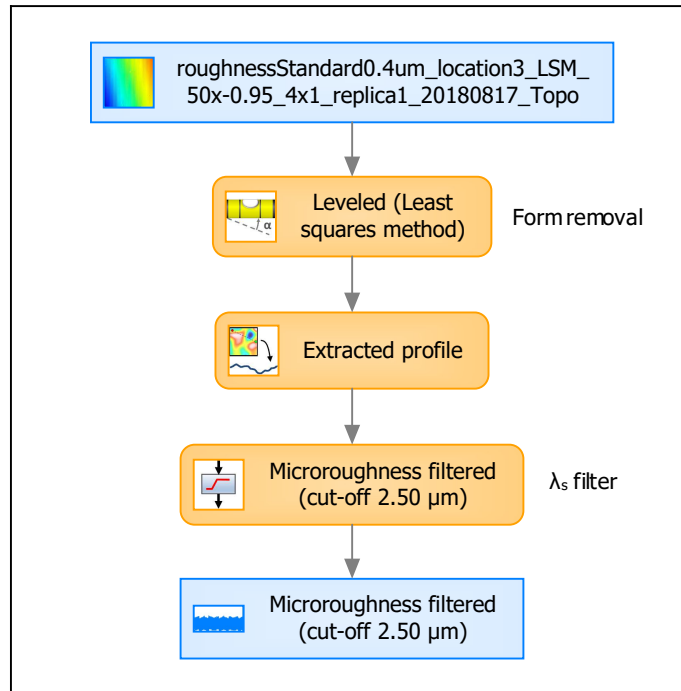

**Roughness standard  $Ra = 0.4 \mu\text{m}$   
50x objective, NA = 0.75 or 0.95, 4x1 tiles**

**Identity card - roughnessStandard0.4um\_locat...**

Name: roughnessStandard0.4um\_location3\_LSM\_50x-0.95\_...  
Created on: 8/17/2018 2:14:19 PM

**Axis: X**  
Length: 944  $\mu\text{m}$   
Size: 7563 points  
Spacing: 0.125  $\mu\text{m}$

**Axis: Y**  
Length: 258  $\mu\text{m}$   
Size: 2069 points  
Spacing: 0.125  $\mu\text{m}$

**Axis: Z**  
Length: 10.6  $\mu\text{m}$   
Size: 65532 digits  
Spacing: 0.162 nm  
NMP ratio: 0.987 % (154420 Pts)

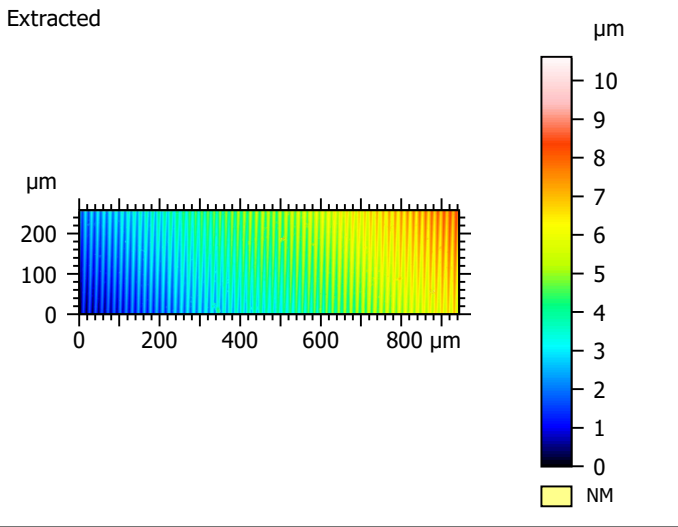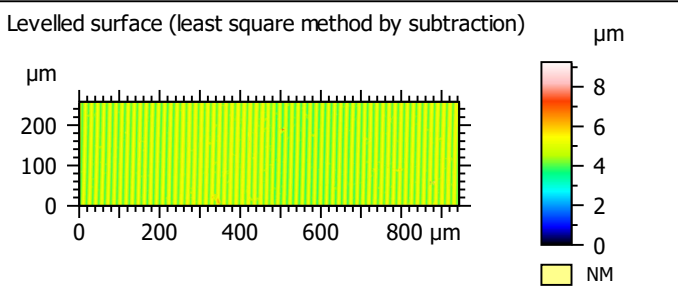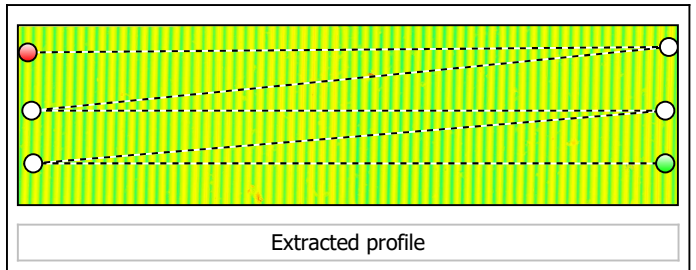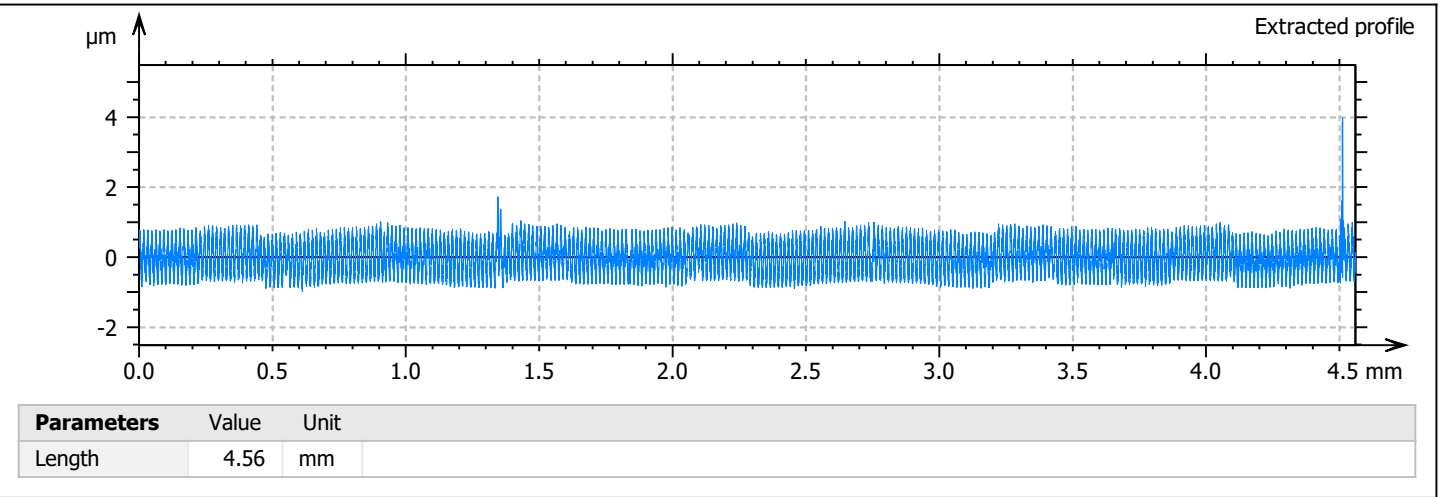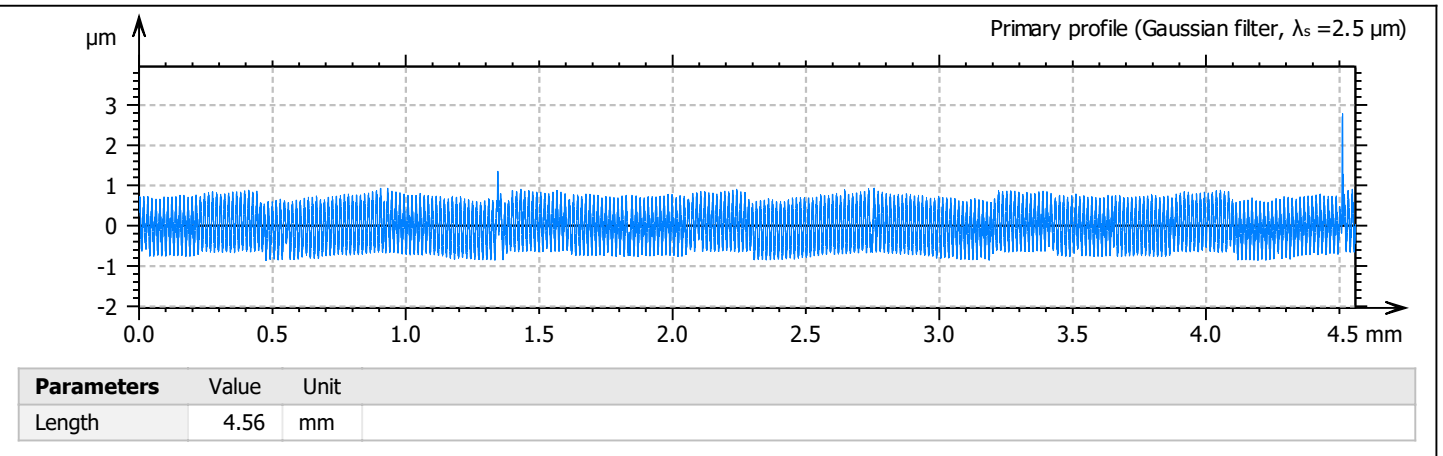

## ISO 4287

### Amplitude parameters - Roughness profile

|    |       |    |                         |                                                     |
|----|-------|----|-------------------------|-----------------------------------------------------|
| Ra | 0.418 | μm | Gaussian filter, 0.8 mm | Arithmetic mean deviation of the roughness profile. |
|----|-------|----|-------------------------|-----------------------------------------------------|

| Parameters                                               | Value | Unit | Tolerance                                                                                               |
|----------------------------------------------------------|-------|------|---------------------------------------------------------------------------------------------------------|
| Ra - Amplitude parameters - Roughness profile - ISO 4287 | 0.418 | μm   | 0.400 μm ± 0.050 μm  |

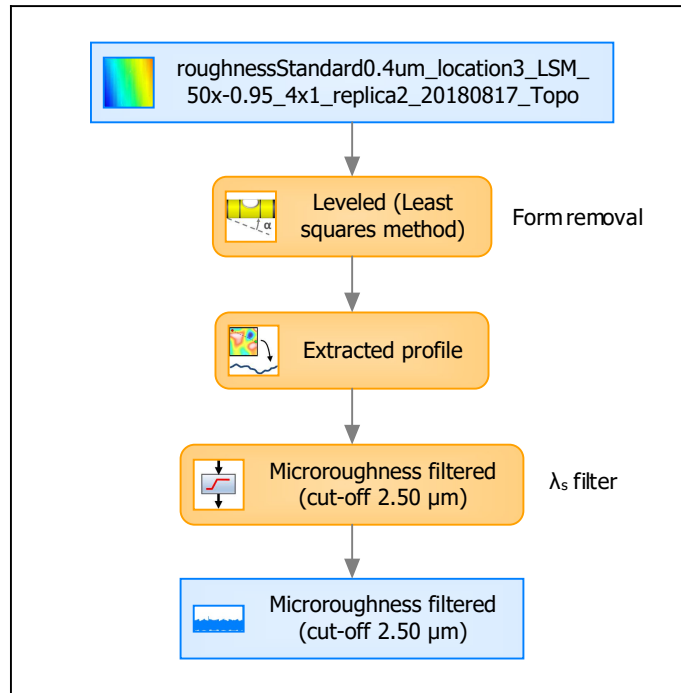

**Roughness standard  $Ra = 0.4 \mu\text{m}$   
50x objective, NA = 0.75 or 0.95, 4x1 tiles**

**Identity card - roughnessStandard0.4um\_locat...**

Name: roughnessStandard0.4um\_location3\_LSM\_50x-0.95\_...  
Created on: 8/17/2018 2:33:55 PM

**Axis: X**  
Length: 944  $\mu\text{m}$   
Size: 7563 points  
Spacing: 0.125  $\mu\text{m}$

**Axis: Y**  
Length: 258  $\mu\text{m}$   
Size: 2069 points  
Spacing: 0.125  $\mu\text{m}$

**Axis: Z**  
Length: 10.7  $\mu\text{m}$   
Size: 65532 digits  
Spacing: 0.163 nm  
NMP ratio: 0.987 % (154420 Pts)

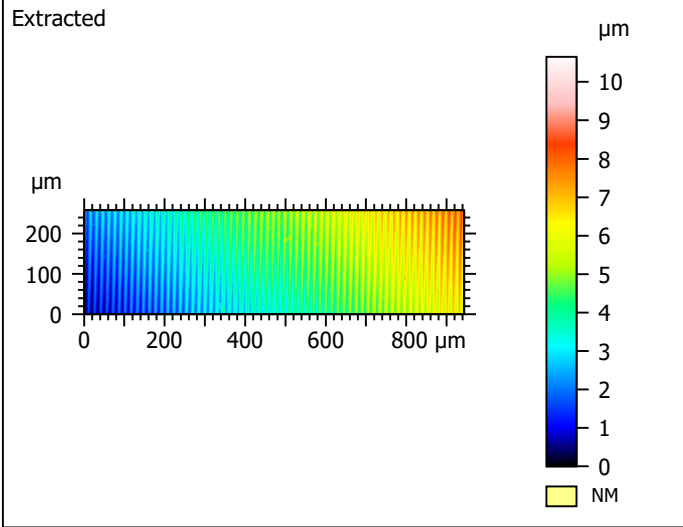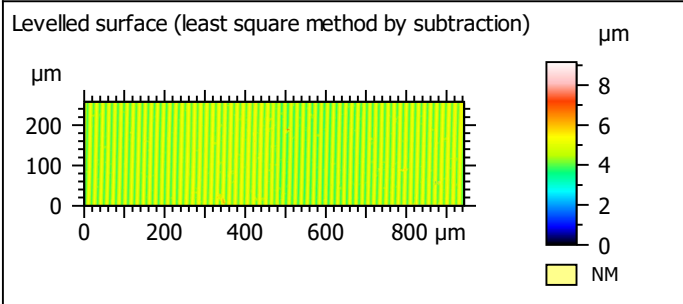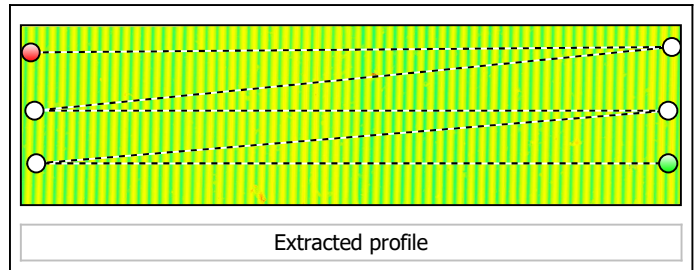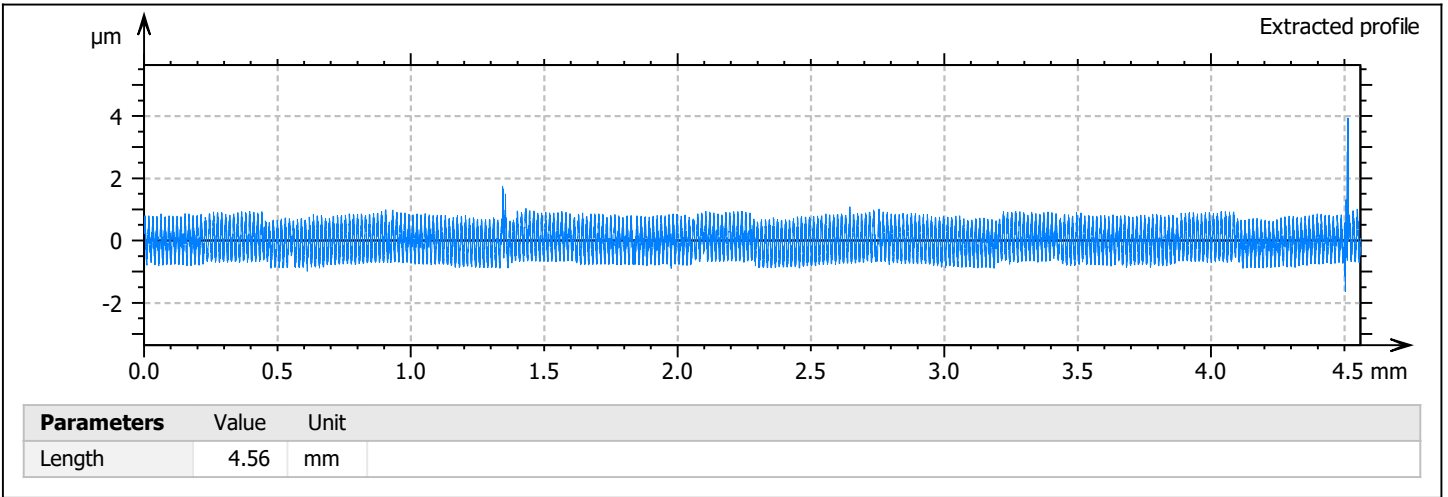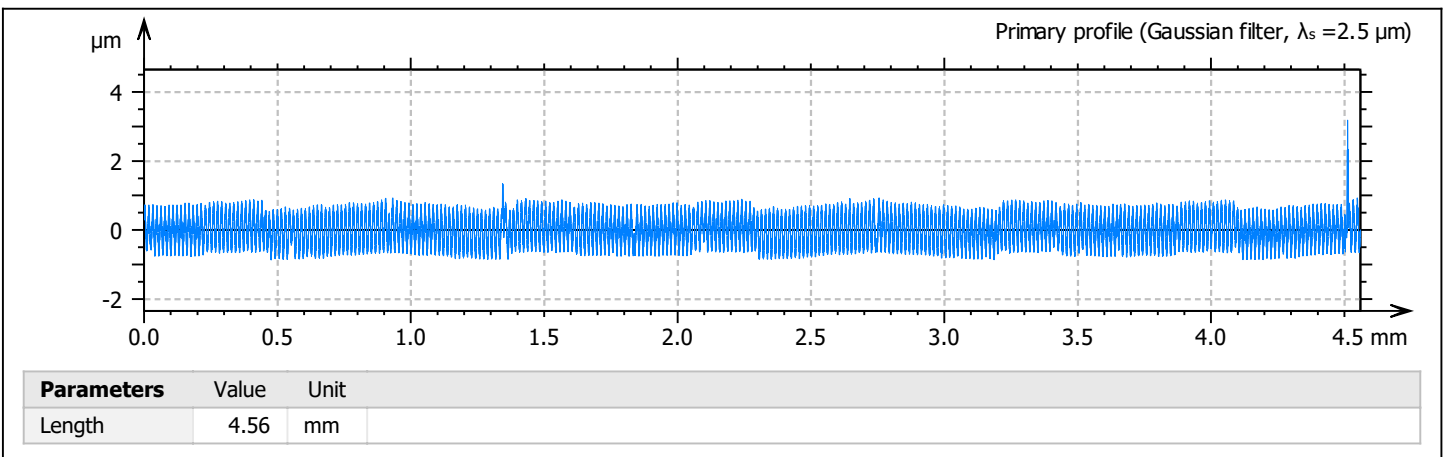

# ISO 4287

## Amplitude parameters - Roughness profile

|    |       |    |                         |                                                     |
|----|-------|----|-------------------------|-----------------------------------------------------|
| Ra | 0.418 | μm | Gaussian filter, 0.8 mm | Arithmetic mean deviation of the roughness profile. |
|----|-------|----|-------------------------|-----------------------------------------------------|

| Parameters                                               | Value | Unit | Tolerance           |
|----------------------------------------------------------|-------|------|---------------------|
| Ra - Amplitude parameters - Roughness profile - ISO 4287 | 0.418 | μm   | 0.400 μm ± 0.050 μm |

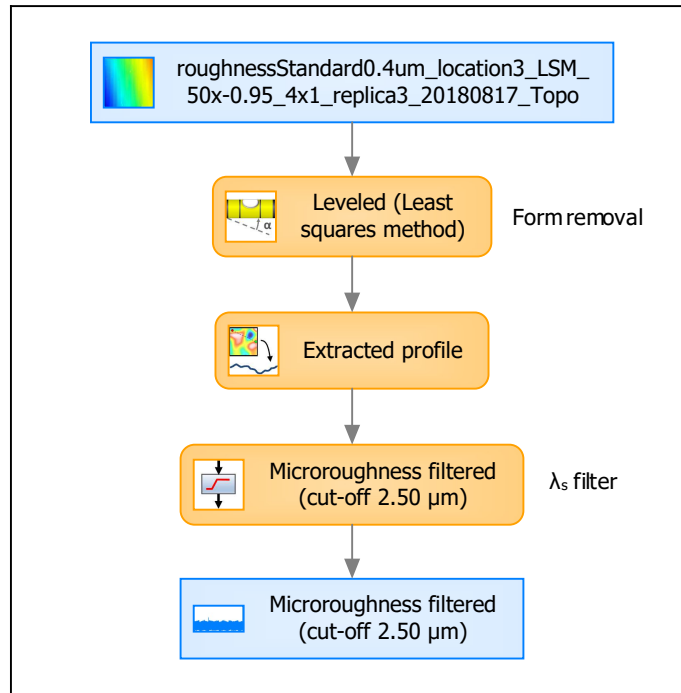

Supplement: 41598_2019_42713_MOESM2_ESM.pdf [file 41598_2019_42713_MOESM2_ESM.pdf]
