# Supplementary material for: The effect of numerical aperture on quantitative use-wear studies and its implication on reproducibility
Source: PubMed Central journal article supplement (PMC6474883; doi:10.1038/s41598-019-42713-w), 2019-04-19
Supplement: 41598_2019_42713_MOESM3_ESM.pdf [file 41598_2019_42713_MOESM3_ESM.pdf]

## **The effect of numerical aperture on quantitative use-wear studies and its implication on reproducibility**

Ivan Calandra, Lisa Schunk, Konstantin Bob, Walter Gneisinger, Antonella Pedernana, Eduardo Paixao, Andreas Hildebrandt, Joao Marreiros

*Scientific Reports*

**Supplementary Material 3.** Raw data, and RStudio project, R markdown scripts and HTML outputs of the statistical procedures.

All files are available on Zenodo (DOI: <https://doi.org/10.5281/zenodo.2594755>).

‘Acquisition paper.Rproj’: RStudio project of the analysis.

‘\*.csv’: CSV files of raw data used for scripts #1 (one file per sample); scripts #2-3 used data in \*.Rbin format created during script #1 (section 5.3).

They should be placed in a folder ‘Data’ within the analysis directory. Note that the ‘last status change’ (= ‘creation’ on Windows) and last access times from these files are different from the files used in the analysis (see section 3 of script #1) because it is a copy of the latter; the modification date/time shows that these files are identical to the ones used for the analysis.

Scripts #1 (Rmd scripts + HTML outputs): Read data from ConfoMap’s batch processing (in CSV format) into R, format the data and save the formatted data (one file per sample).

Script #2 (Rmd scripts + HTML outputs): Calculate descriptive statistics for each location on the sample and objective (one file per sample).

Script #3 (Rmd scripts + HTML outputs): Scatter plots for all ISO 25178-2 parameters and for ISO 4287 *Ra* for each objective (one file per sample).
