# Supplementary material for: The effect of numerical aperture on quantitative use-wear studies and its implication on reproducibility
Source: PubMed Central journal article supplement (PMC6474883; doi:10.1038/s41598-019-42713-w), 2019-04-19
Supplement: 41598_2019_42713_MOESM4_ESM.pdf [file 41598_2019_42713_MOESM4_ESM.pdf]

## **The effect of numerical aperture on quantitative use-wear studies and its implication on reproducibility**

Ivan Calandra, Lisa Schunk, Konstantin Bob, Walter Gneisinger, Antonella Pedernana, Eduardo Paixao, Andreas Hildebrandt, Joao Marreiros

*Scientific Reports*

**Supplementary Material 4.** Python script and results of the Bayesian Multi-factor ANOVA.

All files are available on Zenodo (DOI: <https://doi.org/10.5281/zenodo.2594746>).

'analysisRestrictedModel.py': Python script of the analysis procedure.

'\*\_Auto.pdf': Energy plots of Hamiltonian Monte Carlo for the 26 ISO 25178-2 parameters and for ISO 4287 *Ra*.

'\*\_Contrasts.pdf': Contrast plots between  $50\times/0.75$  and  $50\times/0.95$  objectives for the 26 ISO 25178-2 parameters and for ISO 4287 *Ra*. See also Fig. 3 for *Sa*, *Sdr*, *Sku*, *Sq*, *Std*, *Str*, *Sxp* and *Vmc* and Fig. 5b for *Ra*.

'\*\_HistoMatrix.pdf': Histograms of posterior for the 26 ISO 25178-2 parameters and for ISO 4287 *Ra*.

'\*\_Trace.pdf': Trace plots for the 26 ISO 25178-2 parameters and for ISO 4287 *Ra*.
